# Supplementary material for: Sleep habits and pattern in 1-14 years old children and relationship with video devices use and evening and night child activities
Source: Ital J Pediatr. 2017 Jan 13;43:7. doi: 10.1186/s13052-016-0324-x (PMC5347825; doi:10.1186/s13052-016-0324-x)
Supplement: Additional file 1: — Dataset. (XLS 4134 kb) [file 13052_2016_324_MOESM1_ESM.xls]

## Sheet: Sheet1
id	region	did	interview_date	birth_date	birth_weight	gender	mo_birth_year	mo_job	mo_edu	fa_birth_year	fa_job	fa_edu	lives_with_mo	lives_with_fa	has_older_brothers	has_younger_brothers	has_other_family_members	fa_data_available	weight	wt	stature	ht	sleeps_starts_at_hr	sleeps_starts_at_min	m1	sleeps_ends_at_hr	sleeps_ends_at_min	has_own_room	where_falls_asleep	where_sleeps	dines_at_hr	o_dines	dines_at_min	m_dines	drinks_before_sleep	eats_before_sleep	drinks_during_night	eats_during_night	awakening	sleep_not_night	uses_now_melatonin	uses_now_phytotherapy	uses_now_try	uses_now_b6	uses_now_omeopathy	uses_now_other	uses_now_does_not_remember	place	male
94	9	503	2015-04-01	2006-11-21	3700	f	1974	Employed	Middle	1982	Employed	Middle	y	y	1	0	0		32.000	32	132.0	1.32	22	00	0	7	15	c	parents' bed	own bed	21	21	0	0	other	nothing	nothing	nothing	0	0								North	No
98	9	484	2015-04-01	2002-05-02	3250	m	1963	Employed	University	1963	Employed	High	y	y	1	0	0		39.600	39.6	149.5	1.495	23	00	0	7	15	y	own bed	own bed	20	20	0	0	nothing	sweet	nothing	nothing	0	0								North	Yes
99	9	510	2015-04-01	2003-05-06	3000	m	1977	Employed	Middle	1979	Employed	Middle	y	y	1	2	0		41.000	41	148.0	1.48	22	45	45	7	30	c	own bed	own bed	20	20	0	0	nothing	fruit	nothing	nothing	1	0								North	Yes
100	9	484	2015-04-01	2013-12-26	3200	m	1981	Employed	High	1980	Employed	High	y	y	0	0	0		12.800	12.8	85.0		21	15	15	7	0	y	parents' bed	parents' bed	19	19	15	15	nothing	nothing	nothing	nothing	1	2.25								North	Yes
101	9	515	2015-04-01	2013-12-15	3800	f	1982	Employed	University	1980	Employed	University	y	y	1	0	0		10.000	10	76.0		20	30	30	7	30	c	own bed	own bed	19	19	0	0	milk	nothing	nothing	nothing	4	2								North	No
102	9	515	2015-04-01	2012-09-30	3950	m	1981	Employed	High	1979	Employed	Middle	y	y	0	1	0		10.200	10.2	86.0	0.86	21	15	15	7	15	c	own bed	own bed	20	20	0	0	milk	nothing	nothing	nothing	2	2								North	Yes
104	15	506	2015-04-02	2011-04-17	4400	m	1978	Unemployed	Middle	1982	Other	University	y	y	1	0	4		17.000	17	105.0	1.05	21	30	30	6	30	y	own bed	own bed	20	20	30	30	nothing	nothing	nothing	nothing	0	0								South	Yes
105	9	510	2015-04-02	2014-02-15	2645	f	1980	Employed	University	1977	Employed	University	y	y	0	0	0		9.900	9.9	73.0		21	15	15	6	45	y	other room	own bed	19	19	30	30	nothing	nothing	nothing	nothing	0	3								North	No
108	9	510	2015-04-02	2006-07-20	2580	f	1979	Employed	High	1973	Employed	High	y	y	0	2	1		28.000	28	125.5	1.255	21	00	0	7	0	c	own bed	own bed	19	19	30	30	nothing	fruit	nothing	nothing	0	0								North	No
109	15	497	2015-04-02	2012-11-05	4100	m	1975	Employed	Middle	1979	Employed	High	y	y	2	0	0		14.000	14	98.0	0.98	22	30	30	8	0	n	parents' bed	own bed	20	20	15	15	nothing	nothing	nothing	nothing	4	1.5	y							South	Yes
110	15	497	2015-04-01	2014-03-20	2640	f	1989	Unemployed	High	1988	Unemployed	Middle	y	y	0	0	0		8.500	8.5	74.0		23	00	0	8	30	y	own bed	parents' bed	22	22	45	45	nothing	nothing	nothing	nothing	2	3								South	No
111	15	497	2015-04-02	2003-07-25	3450	m	1975	Employed	Middle	1968	Unemployed	Middle	y	n	1	1	0		50.000	50	151.0	1.51	22	30	30	7	15	y	own bed	own bed	21	21	0	0	nothing	nothing	nothing	nothing	1	0								South	Yes
113	9	503	2015-04-03	2008-08-14	3100	f	1976	Employed	University	1979	Employed	High	y	y	0	1	0		26.000	26	115.0	1.15	22	15	15	8	30	c	own bed	own bed	19	19	45	45	nothing	nothing	nothing	nothing	0	0								North	No
115	9	510	2015-04-02	2014-02-15	2645	f	1980	Employed	University	1977	Employed	University	y	y	0	0	0		9.900	9.9	73.0		21	15	15	6	15	y	other room	own bed	19	19	30	30	nothing	nothing	nothing	nothing	0	3								North	No
116	9	510	2015-04-03	2009-10-06	3200	f	1979	Employed	High	1973	Employed	High	y	y	1	1	1		18.500	18.5	112.0	1.12	21	00	0	8	0	c	own bed	own bed	19	19	30	30	nothing	nothing	nothing	nothing	0	0								North	No
119	9	517	2015-04-07	2011-11-20	2700	m	1983	Employed	High	1976	Employed	High	y	y	0	0	0		14.000	14	101.0	1.01	22	30	30	9	0	y	own bed	own bed	19	19	30	30	nothing	nothing	nothing	nothing	1	1.5								North	Yes
121	9	517	2015-04-08	2012-04-06	2970	f	1977	Employed	High	1965	Employed	High	y	y	1	0	0		16.000	16	100.0	1	21	30	30	8	0	y	own bed	own bed	19	19	30	30	nothing	nothing	nothing	nothing	0	2								North	No
122	9	484	2015-04-08	2013-12-19	2140	m	1980	Unemployed	High	1980	Employed	Middle	y	y	0	0	0		9.000	9	76.5		23	30	30	9	45	y	own bed	own bed	20	20	0	0	nothing	nothing		nothing	1	2								North	Yes
123	9	517	2015-04-08	2011-04-15	3450	m	1980	Employed	High	1978	Employed	High	y	y	0	0	0		18.000	18	104.0	1.04	22	00	0	8	15	y	own bed	own bed	19	19	30	30	milk	nothing	nothing	nothing	1	1.25								North	Yes
124	9	484	2015-04-08	2001-04-23	3220	m	1965	Employed	High	1961	Employed	Middle	y	y	0	1	0		58.300	58.3	175.5	1.755	23	30	30	7	0	c	own bed	own bed	19	19	45	45	nothing	nothing	nothing	nothing	0	0								North	Yes
125	9	515	2015-04-08	2012-04-08	3080	m	1980	Employed	High	1971	Employed	High	y	y	0	0	0		15.000	15	95.0	0.95	21	00	0	8	0	y	own bed	own bed	18	18	45	45	nothing	nothing	nothing	nothing	0	2								North	Yes
126	9	515	2015-04-08	2005-04-24	3200	m	1970	Employed	High	1973	Employed	High	y	y	0	1	0		42.400	42.4	145.0	1.45	23	15	15	7	15	y	own bed	own bed	19	19	30	30	nothing	sweet	nothing	nothing	0	0								North	Yes
129	15	508	2015-04-09	2008-06-05	3520	m	1985	Works at home	High	1978	Employed	Middle	y	y	0	1	0		22.000	22	116.0	1.16	22	00	0	7	30	y	own bed	own bed	20	20	30	30	nothing	nothing	nothing	nothing	0	0.75								South	Yes
130	9	521	2015-04-09	2013-03-23	3120	m	1980	Employed	High	1978	Employed	High	y	y	1	0	0		11.000	11	83.0	0.83	21	30	30	7	0	c	own bed	own bed	19	19	0	0	milk	nothing	nothing	nothing	4	1.5								North	Yes
131	15	504	2015-04-09	2013-03-04	2600	f	1980	Works at home	High	1976	Employed	High	y	y	1	0	0		9.800	9.8	81.0	0.81	20	00	0	7	0	y	parents' bed	parents' bed	19	19	15	15	milk	nothing	nothing	nothing	0	1								South	No
132	15	508	2015-04-09	2013-11-09	3500	f	1992	Employed	Middle	1987	Employed	Middle	y	y	0	0	0		9.500	9.5	77.0		23	00	0	7	45	n	parents' bed	parents' bed	19	19	45	45	nothing	nothing	nothing	nothing	1	1.25								South	No
133	15	508	2015-04-09	2013-11-09	2820	f	1992	Employed	Middle	1987	Employed	Middle	y	y	0	0	0		9.500	9.5	77.0		23	00	0	7	45	n	parents' bed	parents' bed	19	19	45	45	nothing	nothing	nothing	nothing	0	1.25								South	No
135	9	510	2015-04-09	2013-02-20	2530	m	1992	Employed	High	1991	Employed	High	y	y	0	0	4		13.500	13.5	89.5	0.895	22	00	0	7	30	n	parents' bed	parents' bed	18	18	30	30	milk	nothing	nothing	nothing	0	1.5								North	Yes
136	9	510	2015-04-09	2004-01-16	3150	m	1970	Employed	University	1964	Employed	University	y	y	0	1	0		30.500	30.5	139.0	1.39	21	30	30	7	0	c	own bed	own bed	20	20	0	0	nothing	nothing	nothing	nothing	0	0								North	Yes
137	15	497	2015-04-08	2013-05-12	3150	f	1980	Employed	High	1978	Employed	University	y	y	0	0	0		12.000	12	89.0		23	30	30	9	0	y	parents' bed	parents' bed	21	21	0	0	milk	fruit & sweet & salad	milk	nothing	3	1.25								South	No
138	9	517	2015-04-09	2008-10-11	3600	m	1975	Employed	University	1973	Employed	High	y	y	1	0	0		30.000	30	125.0	1.25	21	30	30	7	15	c	own bed	own bed	19	19	30	30	nothing	nothing	nothing	nothing	0	0								North	Yes
139	9	517	2015-04-09	2014-02-08	3630	m	1978	Employed	High	1977	Employed	High	y	y	0	0	0		11.300	11.3	79.0		23	00	0	10	0	n	parents' bed	parents' bed	20	20	15	15	milk	fruit	nothing	nothing	0	1								North	Yes
140	9	510	2015-04-10	2011-11-07	3830	m	1977	Employed	High	1975	Employed	High	y	y	1	1	0		15.000	15	94.5	0.945	21	00	0	8	0	c	own bed	parents' bed	19	19	0	0	nothing	nothing	nothing	nothing	3	0								North	Yes
141	9	517	2015-04-10	2012-10-20	2930	f	1980	Employed	High	1977	Employed	Middle	y	y	0	0	0		13.000	13	88.0	0.88	22	00	0	8	0	y	own bed	parents' bed	19	19	15	15	milk	nothing	nothing	nothing	0	0								North	No
142	9	521	2015-04-10	2012-04-08	3100	f	1978	Employed	High	1975	Employed	Middle	y	y	1	0	0		14.000	14	93.0	0.93	21	00	0	7	15	c	parents' bed	own bed	19	19	0	0	milk	nothing	nothing	nothing	0	3								North	No
145	9	522	2015-04-10	2011-06-10	3850	f	1985	Employed	High	1970	Employed	High	y	y	0	1	0		15.000	15	103.0	1.03	22	30	30	8	0	n	parents' bed	parents' bed	19	19	15	15	nothing	sweet	nothing	nothing	4	1.5								North	No
146	15	508	2015-04-10	2009-07-03	3000	m	1971	Employed	High	1970	Employed	High	y	y	1	0	0		29.000	29	119.0	1.19	21	30	30	7	45	y	own bed	own bed	20	20	0	0	nothing	nothing	nothing	nothing	0	1								South	Yes
147	15	508	2015-04-10	2010-03-18	4400	m	1981	Employed	Middle	1971	Employed	Middle	y	y	0	1	0		28.500	28.5	120.0	1.2	1	30	30	7	30	y	own bed	own bed	21	21	30	30	nothing	nothing	nothing	nothing	0	1								South	Yes
148	9	510	2015-04-10	2003-10-20	2900	f	1961	Employed	University	1960	Employed	University	y	y	2	0	0		42.000	42	154.5	1.545	22	00	0	7	15	c	own bed	own bed	20	20	0	0	nothing	nothing	nothing	nothing	3	0								North	No
149	9	507	2015-04-10	2012-02-16	2970	f	1986	Employed	High	1982	Employed	High	y	y	0	0	0		12.000	12	87.5	0.875	22	15	15	7	15	y	own bed	own bed	20	20	0	0	nothing	fruit & sweet	nothing	nothing	3	1.5								North	No
154	15	497	2015-04-10	2011-03-30	3640	m	1979	Employed	High	1975	Employed	Middle	y	y	1	0	0		22.000	22	105.0	1.05	21	30	30	7	0	n	parents' bed	own bed	20	20	0	0	nothing	nothing	nothing	nothing	0	2								South	Yes
155	15	497	2015-04-09	2009-12-29	3420	m	1992	Works at home	Middle	1987	Employed	Middle	y	y	0	1	0		21.000	21	109.0	1.09	20	45	45	7	30	y	other room	own bed	19	19	45	45	nothing	sweet	nothing	nothing	1	1								South	Yes
156	9	513	2015-04-09	2010-02-12	3470	m	1976	Employed	High	1972	Employed	High	y	y	1	0	0		16.000	16	103.0	1.03	20	45	45	6	30	c	own bed	own bed	19	19	0	0	nothing	nothing	nothing	nothing	1	0.5								North	Yes
157	9	510	2015-04-14	2009-12-21	3000	m	1970	Works at home	High	1970	Employed	Middle	y	y	2	0	0		22.000	22	115.0	1.15	22	30	30	7	0	c	own bed	own bed	20	20	0	0	juice	nothing	nothing	nothing	1	0.5								North	Yes
158	9	522	2015-04-14	2010-03-03	3450	f	1977	Employed	University	1976	Employed	High	y	y	0	1	0		17.000	17	111.5	1.115	21	00	0	6	0	y	parents' bed	own bed	19	19	0	0	nothing	nothing	nothing	nothing	0	0								North	No
159	15	504	2015-04-14	2012-06-30	3090	f	1981	Works at home	Middle	1976	Employed	Middle	y	n	2	0	0		10.500	10.5	83.0	0.83	23	00	0	9	30	na	parents' bed	own bed	20	20	0	0	nothing	salted	nothing	nothing	0	1.5								South	No
160	15	504	2015-04-14	2012-12-26	2460	m	1980	Works at home	High	1982	Employed	High	y	y	0	0	0		11.000	11	82.0	0.82	23	00	0	8	0	na	own bed	own bed	20	20	30	30	nothing	nothing	nothing	nothing	3	2								South	Yes
161	9	514	2015-04-14	2014-01-12	3280	f	1985	Employed	High	1986	Employed	Middle	y	y	0	0	0		9.000	9	75.5		21	00	0	6	45	n	own bed	own bed	18	18	45	45	juice	sweet	nothing	nothing	0	2								North	No
162	9	503	2015-04-14	2010-05-04	3510	f	1972	Employed	High	1968	Employed	High	y	y	1	0	0		17.800	17.8	109.0	1.09	21	30	30	8	45	c	own bed	own bed	19	19	30	30	nothing	nothing	nothing	nothing	0	0								North	No
163	9	503	2015-04-14	2011-03-22	2880	m	1987	Works at home	Middle	1985	Employed	High	y	y	0	1	0		17.000	17	101.0	1.01	23	00	0	7	0	c	parents' bed	own bed	20	20	0	0	milk	nothing	nothing	nothing	0	0								North	Yes
166	9	518	2015-04-14	2013-07-09	4080	f	1969	Unemployed	High	1971	Employed	University	y	y	0	0	0		12.500	12.5	90.0		23	00	0	8	45	y		own bed	20	20	15	15	milk	nothing	nothing	nothing	1	3								North	No
167	9	542	2015-04-14	2008-04-27	3250	m	1971	Employed	University	1969	Employed	University	y	y	1	0	0		22.000	22	125.0	1.25	21	30	30	7	30	c	own bed	own bed	20	20	0	0	nothing	nothing	nothing	nothing	0	0								North	Yes
168	9	522	2015-04-14	2011-11-22	2300	f	1978	Employed	High	1976	Employed	High	y	y	0	1	0		14.000	14	99.0	0.99	21	30	30	8	0	y	own bed	own bed	19	19	45	45	milk	nothing	nothing	nothing	0	1								North	No
169	10	505	2015-04-14	2009-08-03	3650	m	1977	Employed	High	1978	Employed	High	y	y	0	1	0		19.300	19.3	112.3	1.123	22	00	0	7	30	c	parents' bed	own bed	20	20	30	30	nothing	nothing	nothing	nothing	0	0								Center	Yes
170	9	485	2015-04-14	2004-06-14	3280	m	1966	Works at home	Middle	1966	Employed	High	y	y	1	0	0		34.000	34	147.0	1.47	22	45	45	9	30	c	own bed	own bed	19	19	15	15	nothing	nothing	nothing	nothing	0	0								North	Yes
171	9	485	2015-04-14	2013-03-13	3710	m	1976	Employed	High	1968	Employed	High	y	y	1	0	0		14.000	14	89.0	0.89	22	00	0	8	0	c	parents' bed	own bed	18	18	45	45	nothing	nothing	nothing	nothing	0	3								North	Yes
172	9	484	2015-04-14	2014-03-03	3955	f	1976	Unemployed	University	1973	Employed	High	y	y	0	0	0		9.200	9.2	74.3		22	15	15	8	0	y	other room	parents' bed	20	20	30	30	nothing	nothing	nothing	nothing	2	1								North	No
173	15	508	2015-04-14	2013-04-27	3240	f	1973	Employed	University	1965	Employed	High	y	y	0	0	0		11.200	11.2	83.0		22	45	45	7	30	n	own bed	own bed	20	20	0	0	nothing	nothing	nothing	nothing	5	0.75	y							South	No
174	15	508	2015-04-14	2008-07-27	2450	m	1984	Works at home	Elementary	1980	Employed	Elementary	y	y	0	0	0		23.000	23	118.0	1.18	20	30	30	7	0	y	own bed	own bed	19	19	30	30	nothing	nothing	nothing	nothing	0	0.75								South	Yes
175	9	542	2015-04-14	2013-12-14	3260	m	1988	Works at home	High	1980	Employed	High	y	y	1	0	0		11.700	11.7	79.0		23	00	0	7	45	y	own bed	own bed	18	18	45	45	milk	nothing	nothing	nothing	2	2								North	Yes
176	9	510	2015-04-14	2013-04-07	2780	m	1976	Employed	University	1977	Employed	High	y	y	0	0	0		11.900	11.9	85.0	0.85	22	30	30	7	30	n	parents' bed	own bed	19	19	30	30	nothing	fruit	nothing	fruit	1	1.5								North	Yes
177	9	532	2015-04-14	2005-09-08	1950	f	1975	Employed	High	1974	Employed	High	y	y	0	1	0		32.200	32.2	144.4	1.444	21	30	30	7	0	c	own bed	own bed	19	19	0	0	nothing	nothing	nothing	nothing	0	0								North	No
178	9	532	2015-04-14	2006-10-02	2720	f	1975	Employed	High	1974	Employed	High	y	y	1	0	0		27.400	27.4	129.4	1.294	21	30	30	7	15	c	own bed	own bed	19	19	0	0	nothing	nothing	nothing	nothing	1	0								North	No
180	9	513	2015-04-09	2007-05-08	2780	f	1976	Employed	High	1972	Employed	High	y	y	0	1	0		28.500	28.5	126.5	1.265	20	45	45	6	30	c	own bed	own bed	19	19	0	0	nothing	nothing	nothing	nothing	0	0								North	No
181	9	513	2015-04-09	2010-04-08	3750	f	1975	Employed	High	1973	Employed	High	y	y	1	0	0		17.700	17.7	105.5	1.055	21	45	45	8	0	c	own bed	own bed	20	20	0	0	nothing	nothing	nothing	nothing	1	0								North	No
182	9	507	2015-04-14	2003-10-02	4050	m	1973	Employed	High	1973	Employed	Middle	y	y	0	1	0		39.000	39	149.5	1.495	22	00	0	6	45	y	own bed	own bed	19	19	30	30	nothing	nothing	nothing	nothing	0	0	y							North	Yes
183	9	513	2015-04-14	2007-12-03	3570	m	1967	Employed	Middle	1972	Employed	High	y	y	0	0	0		24.500	24.5	125.0	1.25	22	00	0	7	30	y	parents' bed	parents' bed	19	19	15	15	nothing	nothing	nothing	nothing	0	0								North	Yes
184	9	507	2015-04-14	2009-11-30	2400	f	1979	Employed	High	1974	Employed	University	y	y	0	0	0		18.000	18	114.5	1.145	21	00	0	9	45	y	other room	parents' bed	20	20	0	0	nothing	nothing	nothing	nothing	0	0.5								North	No
185	9	503	2015-04-14	2010-02-28	3200	m	1979	Employed	University	1967	Employed	High	y	y	1	1	0		24.500	24.5	116.0	1.16	21	30	30	7	0	c	own bed	own bed	19	19	15	15	nothing	nothing	nothing	nothing	0	0								North	Yes
186	9	517	2015-04-14	2013-08-19	3800	m	1984	Works at home	University	1980	Employed	University	y	y	0	0	0		12.000	12	81.0		21	30	30	6	30	y	own bed	own bed	19	19	30	30	nothing	nothing	nothing	nothing	0	2.5								North	Yes
187	9	517	2015-04-14	2004-05-14	3600	f	1973	Employed	University	1973	Employed	University	y	y	0	1	0		50.000	50	150.0	1.5	22	45	45	7	15	y	parents' bed	parents' bed	19	19	45	45	nothing	nothing	nothing	nothing	5	0								North	No
188	9	522	2015-04-14	2011-11-22	2300	f	1978	Employed	University	1976	Employed	High	y	y	0	1	0		14.000	14	99.0	0.99	21	30	30	8	0	y	own bed	own bed	19	19	45	45	milk	nothing	nothing	nothing	0	1								North	No
189	9	522	2015-04-14	2010-03-03	3450	f	1977	Employed	University	1976	Employed	High	y	y	0	1	0		17.000	17	111.5	1.115	21	00	0	6	0	y	parents' bed	own bed	19	19	0	0	nothing	nothing	nothing	nothing	0	0								North	No
191	10	505	2015-04-15	2010-04-13	3690	m	1979	Employed	High	1978	Employed	High	y	y	1	0	0		18.700	18.7	113.6	1.136	21	45	45	6	45	c	other room	own bed	20	20	30	30	nothing	nothing	nothing	nothing	0	0								Center	Yes
192	10	505	2015-04-15	2013-10-13	3800	f	1984	Works at home	Middle	1972	Employed	High	y	y	2	0	0		11	11	82.5		21	00	0	6	45	c	parents' bed	own bed	19	19	30	30	milk	nothing	nothing	nothing	0	1								Center	No
193	9	532	2015-04-15	2013-06-30	3200	f	1973	Employed	University	1970	Employed	University	y	y	1	0	0		12.000	12	84.0		22	00	0	8	0	y	own bed	own bed	19	19	30	30	milk	nothing	nothing	nothing	0	1								North	No
196	15	508	2015-04-15	2009-06-24	2960	f	1968	Employed	High	1966	Employed	High	y	y	0	0	0		32.500	32.5	124.5	1.245	22	00	0	8	0	y	own bed	own bed	20	20	45	45	nothing	nothing	nothing	nothing	0	1								South	No
198	9	517	2015-04-15	2012-05-17	3970	f	1979	Works at home	High	1977	Employed	High	y	y	0	0	0		16.000	16	100.0	1	23	00	0	9	30	y	parents' bed	parents' bed	20	20	0	0	milk	nothing	nothing	nothing	0	1								North	No
199	9	517	2015-04-15	2010-01-08	2800	f	1974	Employed	University	1972	Employed	University	y	y	0	1	0		18.000	18	106.0	1.06	21	15	15	8	0	c	own bed	own bed	19	19	30	30	nothing	nothing	nothing	nothing	0	0								North	No
200	9	522	2015-04-15	2011-04-04	2700	f	1978	Employed	High	1975	Employed	High	y	y	0	1	0		14.100	14.1	101.0	1.01	21	00	0	6	45	y	own bed	own bed	19	19	30	30	nothing	nothing	nothing	nothing	1	0	y							North	No
201	9	525	2015-04-15	2009-10-13	3200	m	1977	Works at home	High	1973	Other	Middle	y	y	0	1	0		17.800	17.8	107.0	1.07	22	30	30	7	30	y	own bed	own bed	19	19	30	30	nothing	nothing	nothing	nothing	0	0								North	Yes
202	9	525	2015-04-15	2013-12-11	3200	m	1977	Works at home	High	1973	Other	Middle	y	y	1	0	0		12.200	12.2	80.0		21	30	30	7	0	y	own bed	own bed	19	19	30	30	nothing	salted & sweet	nothing	nothing	1	2								North	Yes
203	9	484	2015-04-15	2013-11-04	3750	f	1975	Works at home	University	1976	Employed	Middle	y	y	1	0	0		10.200	10.2	81.0		23	00	0	9	0	c	other room	own bed	20	20	45	45	milk	nothing	nothing	nothing	2	2								North	No
204	9	484	2015-04-15	2001-05-08	2840	m	1964	Works at home	High	1960	Employed	High	y	y	2	0	0		42.900	42.9	157.4	1.574	22	30	30	7	0	y	own bed	own bed	19	19	15	15	nothing	nothing	nothing	nothing	0	0								North	Yes
206	9	513	2015-04-15	2012-01-17	3400	m	1971	Employed	High	1975	Employed	High	y	y	1	0	0		14.400	14.4	99.0	0.99	21	45	45	7	15	c	own bed	own bed	19	19	30	30	nothing	nothing	nothing	nothing	1	2								North	Yes
207	4	491	2015-04-15	2013-04-09	3370	m	1990	Works at home	Middle	1985	Employed	Middle	y	y	1	0	0		16.500	16.5	99.0	0.99	22	15	15	8	0	n	parents' bed	parents' bed	19	19	30	30	nothing	sweet	nothing	nothing	4	0								South	Yes
208	9	485	2015-04-15	2004-02-24	3360	m	1973	Employed	Middle	1970	Employed	Middle	y	y	0	1	0		45.900	45.9	140.5	1.405	23	00	0	7	45	c	parents' bed	own bed	20	20	0	0	nothing	nothing	nothing	nothing	1	0								North	Yes
209	9	522	2015-04-15	2012-03-17	2760	f	1981	Employed	High	1977	Employed	High	y	y	0	0	0		14.000	14	93.0	0.93	21	30	30	7	0	y	parents' bed	own bed	19	19	30	30	nothing	nothing	nothing	nothing	0	1								North	No
211	15	516	2015-04-15	2012-09-24	2840	f	1976	Other	High	1977	Other	Middle	y	y	2	0	4		11.400	11.4	88.0	0.88	22	30	30	9	30	n	parents' bed	parents' bed	20	20	0	0	nothing	nothing	nothing	nothing	2	0								South	No
212	20	489	2015-04-15	2004-03-01	3720	m	1970	Works at home	High	1971	Employed	University	y	y	0	1	0		42.000	42	145.0	1.45	21	30	30	7	15	y	own bed	own bed	19	19	30	30	nothing	nothing	nothing	nothing	0	0								North	Yes
213	9	503	2015-04-15	2010-01-14	3000	f	1977	Employed	University	1975	Employed	High	y	y	1	0	0		19.000	19	108.0	1.08	21	30	30	8	0	c	own bed	own bed	19	19	0	0	nothing	nothing	nothing	nothing	5	0	y							North	No
214	9	503	2015-04-15	2007-12-21	2800	m	1977	Employed	University	1975	Employed	High	y	y	0	1	0		22.000	22	120.0	1.2	21	45	45	7	0	c	own bed	parents' bed	19	19	0	0	nothing	nothing	nothing	nothing	1	0								North	Yes
215	4	491	2015-04-15	2005-09-29	3450	m	1973	Works at home	High	1969	Employed	Middle	y	y	2	0	0		42.500	42.5	142.6	1.426	22	30	30	7	0	y	own bed	own bed	19	19	30	30	nothing	nothing	nothing	nothing	0	0								South	Yes
216	9	510	2015-04-15	2009-07-17	3530	m	1970	Employed	University	1965	Employed	University	y	y	1	0	0		24.000	24	116.0	1.16	22	45	45	7	30	c	other room	own bed	20	20	0	0	milk & juice	nothing	nothing	nothing	0	0								North	Yes
217	9	503	2015-04-15	2001-08-27	3100	f	1975	Employed	Middle	1960	Employed	High	y	y	0	0	0		45.500	45.5	158.0	1.58	23	00	0	7	15	y	own bed	own bed	20	20	0	0	nothing	nothing	nothing	nothing	0	0								North	No
218	9	518	2015-04-15	2013-09-28	3260	m	1975	Employed	High	1974	Employed	High	y	y	1	0	0		14.300	14.3	87.0		22	00	0	6	45	na		own bed	19	19	45	45	nothing	fruit	milk	nothing	2	2.25								North	Yes
219	15	519	2015-04-15	2013-04-02	2950	m	1988	Works at home	High	1984	Employed	High	y	y	0	0	0		14.000	14	97.0	0.97	22	00	0	6	30	y	parents' bed	own bed	20	20	30	30	nothing	nothing	nothing	nothing	2	1								South	Yes
220	9	513	2015-04-15	2007-11-18	2990	f	1980	Employed	High	1974	Employed	High	y	y	0	1	0		23.000	23	125.5	1.255	21	15	15	7	30	c	own bed	own bed	20	20	0	0	nothing	nothing	nothing	nothing	0	0								North	No
221	15	519	2015-04-15	2012-12-29	2280	f	1990	Works at home	Middle	1986	Employed	Middle	y	y	0	1	0		11.900	11.9	91.0	0.91	21	30	30	7	0	c	own bed	own bed	20	20	0	0	milk	salted & sweet	nothing	nothing	2	1								South	No
222	9	513	2015-04-15	2012-12-10	3270	m	1980	Employed	High	1974	Employed	High	y	y	1	0	0		11.400	11.4	88.0	0.88	21	30	30	7	45	c	own bed	own bed	20	20	0	0	nothing	nothing	nothing	nothing	1	1.5								North	Yes
223	15	519	2015-04-15	2011-10-31	2745	f	1986	Employed	High	1984	Employed	High	y	y	0	0	0		12.000	12	91.0	0.91	22	00	0	6	15	y	parents' bed	parents' bed	21	21	0	0	milk	nothing	nothing	nothing	2	0								South	No
224	9	503	2015-04-15	2004-02-06	2700	f	1963	Employed	High	1961	Employed	High	y	n	0	0	0		29.300	29.3	134.6	1.346	22	00	0	7	30	y	parents' bed	parents' bed	20	20	15	15	nothing	sweet	nothing	nothing	0	0								North	No
226	9	485	2015-04-15	2009-06-30	3200	m	1976	Employed	High	1972	Employed	High	y	y	2	0	0		19.500	19.5	111.0	1.11	21	30	30	7	45	y	own bed	own bed	19	19	45	45	juice	nothing	nothing	nothing	2	0.5								North	Yes
228	9	518	2015-04-16	2009-07-21	3310	f	1982	Works at home	High	1979	Employed	University	y	y	1	0	0		24.300	24.3	118.5	1.185	21	15	15	7	0	y	own bed	own bed	20	20	0	0	nothing	nothing	nothing	nothing	0	0								North	No
229	9	553	2015-04-16	2014-04-13	3290	m	1979	Employed	Middle	1979	Employed	Middle	y	y	1	0	0		9.600	9.6	76.4		21	30	30	7	45	c	own bed	own bed	19	19	0	0	milk	nothing	nothing	nothing	2	2.5								North	Yes
230	15	508	2015-04-16	2012-10-29	3590	m	1982	Employed	High	1981	Employed	Middle	y	y	0	0	0		12.600	12.6	89.0	0.89	23	30	30	7	30	y	parents' bed	parents' bed	19	19	30	30	nothing	nothing	nothing	nothing	0	1								South	Yes
231	15	508	2015-04-16	2013-12-12	2980	m	1983	Employed	High	1985	Employed	Middle	y	y	0	0	0		12.000	12	81.0		22	45	45	10	15	n	own bed	own bed	20	20	30	30	nothing	nothing	nothing	nothing	0	1								South	Yes
232	9	553	2015-04-16	2013-10-23	3510	f	1980	Employed	University	1978	Employed	University	y	y	1	0	0		10.700	10.7	81.1		22	30	30	8	0	c	parents' bed	parents' bed	19	19	30	30	nothing	nothing	nothing	nothing	2	2								North	No
233	20	489	2015-04-16	2012-04-12	3000	f	1975	Employed	High	1972	Employed	University	y	y	1	0	0		19.900	19.9	99.2	0.992	23	45	45	8	30	y	own bed	own bed	20	20	0	0	milk & juice	nothing	nothing	nothing	0	2								North	No
234	9	522	2015-04-16	2011-10-25	4000	f	1980	Employed	High	1981	Employed	High	y	y	0	0	0		14.000	14	95.0	0.95	21	00	0	8	0	y	parents' bed	parents' bed	20	20	0	0	nothing	nothing	nothing	nothing	1	0								North	No
235	4	491	2015-04-16	2014-01-16	3160	m	1975	Works at home	Middle	1971	Employed	High	y	y	3	0	1		13.000	13	76.5		20	30	30	6	45	n	parents' bed	parents' bed	19	19	0	0	nothing	fruit	nothing	nothing	0	2								South	Yes
236	9	485	2015-04-16	2013-04-09	3940	m	1974	Employed	University	1970	Employed	University	y	y	1	0	0		14.400	14.4	88.0	0.88	22	30	30	7	30	c	other room	own bed	19	19	30	30	nothing	nothing	nothing	nothing	0	1.5								North	Yes
237	9	485	2015-04-16	2003-07-05	3330	f	1968	Works at home	High	1966	Employed	High	y	y	1	0	0		43.600	43.6	148.0	1.48	22	00	0	7	0	y	own bed	own bed	20	20	30	30	nothing	nothing	nothing	nothing	0	0								North	No
238	9	522	2015-04-16	2009-07-04	3330	f	1975	Employed	High	1968	Employed	High	y	y	0	0	0		20.000	20	117.0	1.17	21	15	15	6	30	y	other room	parents' bed	19	19	0	0	nothing	nothing	nothing	nothing	0	0								North	No
239	9	525	2015-04-16	2013-09-01	3330	f	1979	Other	University	1976	Other	High	y	y	0	0	0		11.100	11.1	85.0		21	00	0	7	0	y	own bed	own bed	19	19	30	30	nothing	nothing	nothing	nothing	2	1.5								North	No
242	9	532	2015-04-16	2010-02-27	3050	f	1970	Employed	High	1974	Employed	High	y	y	1	0	0		17.800	17.8	110.8	1.108	22	00	0	8	0	c	own bed	own bed	20	20	0	0	nothing	nothing	nothing	nothing	1	0								North	No
243	9	542	2015-04-16	2008-05-05	2720	f	1977	Works at home	High	1972	Employed	Middle	y	y	0	1	0		20.000	20	118.0	1.18	22	00	0	8	30	n	own bed	own bed	19	19	30	30	nothing	nothing	nothing	nothing	0	0								North	No
244	9	513	2015-04-16	2010-04-08	3450	f	1972	Employed	University	1972	Employed	University	y	y	0	0	0		20.000	20	116.0	1.16	21	30	30	7	0	y	own bed	own bed	19	19	30	30	nothing	nothing	nothing	nothing	0	0								North	No
245	9	510	2015-04-16	2006-02-19	3330	m	1983	Employed	Middle	1979	Unemployed	Middle	y	y	0	2	0		26.500	26.5	130.5	1.305	23	30	30	7	15	c	own bed	own bed	19	19	30	30	other	nothing	nothing	nothing	0	0								North	Yes
246	9	513	2015-04-16	2004-04-12	3680	f	1973	Employed	Middle	1966	Employed	Middle	y	y	1	1	0		49.000	49	149.0	1.49	22	00	0	7	15	c	own bed	own bed	19	19	45	45	nothing	nothing	nothing	nothing	1	0								North	No
247	9	542	2015-04-16	2002-01-28	3320	m	1966	Works at home	Middle	1964	Employed	High	y	y	0	1	0		76.000	76	174.0	1.74	22	00	0	7	15	y	own bed	own bed	19	19	30	30	nothing	nothing	nothing	nothing	0	0								North	Yes
248	9	513	2015-04-16	2005-03-07	2910	f	1966	Employed	High	1961	Employed	Middle	y	y	0	1	0		32.000	32	142.0	1.42	23	15	15	7	15	c	own bed	own bed	19	19	30	30	nothing	nothing	nothing	nothing	0	0								North	No
249	9	513	2015-04-16	2007-04-26	4210	m	1966	Employed	High	1961	Employed	Middle	y	y	1	0	0		25.400	25.4	132.5	1.325	21	45	45	7	30	c	own bed	own bed	19	19	30	30	nothing	fruit	nothing	nothing	0	0								North	Yes
251	15	516	2015-04-16	2013-02-25	3400	f	1975	Other	University	1975	Other	High	y	y	1	0	4		13.000	13	94.0	0.94	2	00	0	10	30	n	parents' bed	parents' bed	19	19	45	45	nothing	salted & sweet	nothing	nothing	1	2								South	No
253	15	497	2015-04-15	2008-08-17	2000	m	1976	Employed	University	1966	Employed	High	y	y	1	1	0		19.000	19	115.5	1.155	22	00	0	7	15	y	own bed	own bed	20	20	0	0	nothing	nothing	nothing	nothing	0	0								South	Yes
254	15	516	2015-04-16	2008-04-12	3380	f	1975	Other	University	1975	Other	High	y	y	0	1	0		22.000	22	130.0	1.3	23	00	0	7	45	y	own bed	own bed	20	20	30	30	nothing	nothing	nothing	nothing	1	0								South	No
255	15	516	2015-04-16	2005-07-23	3350	m	1974	Works at home	Middle	1970	Other	Elementary	y	y	0	1	0		35.000	35	145.0	1.45	22	00	0	7	0	y	own bed	own bed	21	21	0	0	nothing	nothing	nothing	nothing	0	0								South	Yes
256	9	553	2015-04-17	2012-02-21	3030	f	1969	Employed	High	1968	Employed	University	y	y	0	0	0		15.200	15.2	95.8	0.958	21	30	30	7	15	y	parents' bed	parents' bed	20	20	0	0	milk	nothing	nothing	nothing	0	1								North	No
257	9	510	2015-04-17	2012-03-19	2820	f	1974	Employed	University	1970	Employed	High	y	y	0	0	0		15.200	15.2	90.0	0.9	21	15	15	6	45	y	parents' bed	own bed	20	20	15	15	nothing	nothing	nothing	nothing	1	1.75								North	No
258	20	489	2015-04-17	2012-05-04	3710	m	1981	Employed	University	1975	Employed	High	y	y	2	0	0		16.900	16.9	95.4	0.954	22	00	0	7	30	y	other room	parents' bed	20	20	0	0	nothing	nothing	nothing	nothing	1	1								North	Yes
259	4	491	2015-04-17	2014-01-15	3070	m	1973	Works at home	Middle	1967	Employed	High	y	y	2	0	0		12.200	12.2	80.5		0	15	15	7	0	n	parents' bed	parents' bed	18	18	30	30	milk	nothing	milk	nothing	3	2								South	Yes
261	9	517	2015-04-16	2004-03-18	2750	f	1970	Employed	High	1968	Employed	High	y	y	1	0	0		35.000	35	140.0	1.4	21	00	0	7	0	y	own bed	own bed	19	19	30	30	nothing	nothing	nothing	nothing	0	0								North	No
262	9	517	2015-04-17	2009-04-05	3780	f	1974	Employed	University	1975	Employed	High	y	y	0	1	0		20.000	20	113.0	1.13	22	30	30	7	15	n	other room	own bed	20	20	30	30	nothing	nothing	nothing	nothing	0	0								North	No
263	9	522	2015-04-17	2013-03-14	3390	m	1975	Works at home	Middle	1975	Employed	Middle	y	y	1	0	0		17.000	17	96.0	0.96	22	00	0	7	45	n	other room	own bed	19	19	0	0	nothing	nothing	nothing	nothing	1	1.5								North	Yes
264	9	517	2015-04-17	2010-09-03	3000	m	1976	Works at home	University	1970	Employed	High	y	y	1	1	0		14.000	14	103.0	1.03	21	30	30	8	30	c	own bed	own bed	19	19	0	0	nothing	nothing	nothing	nothing	0	0								North	Yes
265	9	522	2015-04-17	2006-07-13	3230	m	1976	Works at home	High	1975	Employed	High	y	y	0	1	0		29.500	29.5	130.0	1.3	22	00	0	7	15	y	own bed	own bed	20	20	0	0	nothing	nothing	nothing		0	0								North	Yes
266	9	507	2015-04-17	2011-08-24	3650	m	1981	Employed	High	1978	Employed	High	y	y	0	1	0		18.500	18.5	107.3	1.073	24	00	0	10	30	y	own bed	own bed	19	19	30	30	nothing	nothing	nothing	nothing	0	0								North	Yes
268	9	531	2015-04-10	2012-11-30	3190	f	1981	Employed	University	1969	Employed	High	y	y	0	1	0		13.000	13	90.0	0.9	22	00	0	8	0	n	parents' bed	parents' bed	20	20	0	0	nothing	sweet	nothing	nothing	0	2								North	No
269	9	531	2015-04-14	2009-04-23	3750	f	1971	Works at home	High	1969	Employed	University	y	y	0	0	0		17.000	17	110.0	1.1	21	45	45	7	45	n	parents' bed	parents' bed	20	20	0	0	nothing	sweet	nothing	nothing	0	0								North	No
270	9	531	2015-04-14	2014-01-22	3000	f	1983	Works at home	Middle	1976	Employed	Middle	y	y	0	0	2		9.000	9	79.0		22	00	0	8	0	n	own bed	own bed	19	19	30	30	nothing	nothing	milk	nothing	3	1.5								North	No
271	9	531	2015-04-14	2006-03-23	3940	f	1984	Employed	Middle	1978	Employed	Middle	y	n	0	1	0		34.000	34	130.0	1.3	22	00	0	7	0	y	parents' bed	parents' bed	20	20	0	0	nothing	nothing	nothing	nothing	1	0								North	No
272	9	484	2015-04-17	2013-12-31	3525	m	1980	Employed	Middle	1966	Employed	Middle	y	y	0	0	0		9.200	9.2	77.2		22	30	30	8	0	n	parents' bed	own bed	19	19	30	30	milk	sweet	nothing	nothing	3	2.5								North	Yes
273	9	531	2015-04-14	2008-02-12	4150	m	1966	Employed	University				y	y	1	0	0	n	29.000	29	135.0	1.35	22	15	15	7	0	n	own bed	own bed	19	19	15	15	nothing	nothing	nothing	nothing	0	0								North	Yes
274	9	531	2015-04-14	2003-10-20	3100	f	1972	Employed	High	1971	Employed	High	y	y	1	0	0		52.000	52	154.0	1.54	21	30	30	7	0	y	own bed	own bed	19	19	15	15	nothing	nothing	nothing	nothing	0	0								North	No
276	9	510	2015-04-17	2009-02-12	2920	f	1962	Employed	High	1960	Employed	High	y	y	0	0	1		21.000	21	116.0	1.16	22	00	0	7	45	n	own bed	own bed	19	19	45	45	nothing	nothing	nothing	nothing	0	0								North	No
277	16	548	2015-04-17	2011-03-31	3200	f	1977	Employed	Middle	1964	Unemployed	Middle	y	y	0	0	0		20.500	20.5	109.5	1.095	22	30	30	7	45	n	own bed	own bed	20	20	15	15	nothing	nothing	nothing	nothing	0	2								Center	No
278	9	542	2015-04-17	2012-05-14	2400	m	1973	Employed	University	1973	Employed	University	y	y	1	0	0		14.000	14	99.0	0.99	21	30	30	7	30	y	own bed	own bed	19	19	30	30	milk	nothing	nothing	nothing	1	2								North	Yes
279	9	542	2015-04-17	2012-01-12	2890	m	1985	Employed	Elementary	1985	Employed	High	y	y	1	0	0		15.000	15	101.0	1.01	22	15	15	7	0	n	parents' bed	own bed	19	19	30	30	nothing	salted	nothing	nothing	3	0								North	Yes
280	9	507	2015-04-17	2007-11-16	3520	f	1983	Employed	High	1985	Employed	Middle	y	n	0	0	0		33.000	33	132.0	1.32	22	00	0	7	30	y	own bed	outside home	19	19	30	30	nothing	nothing	nothing	nothing	0	0								North	No
281	16	548	2015-04-17	2005-04-29	3400	f	1960	Works at home	High	1957	Employed	Middle	y	y	2	0	0		31.500	31.5	128.0	1.28	22	00	0	7	30	n	own bed	own bed	20	20	15	15	milk	other	nothing	nothing	0	0								Center	No
282	9	485	2015-04-17	2007-01-10	3180	f	1987	Works at home	High	1979	Employed	High	y	y	0	1	0		31.000	31	128.0	1.28	22	00	0	6	30	y	own bed	own bed	20	20	0	0	nothing	nothing	nothing	nothing	0	0								North	No
283	9	510	2015-04-16	2008-11-09	3590	f	1971	Employed	University	1975	Employed	University	y	y	1	0	0		26.500	26.5	120.0	1.2	22	00	0	7	0	c	own bed	own bed	20	20	15	15	milk & juice	nothing	nothing	nothing	0	0								North	No
284	9	515	2015-04-14	2002-11-12	4300	m	1978	Works at home	Middle	1971	Employed	Middle	y	y	1	2	0		31.000	31	139.5	1.395	24	00	0	8	0	c	own bed	own bed	20	20	0	0	nothing	nothing	nothing	nothing	0	0								North	Yes
285	9	484	2015-04-17	2001-05-09	4050	m	1965	Employed	High	1963	Employed	High	y	y	0	1	0		51.000	51	168.0	1.68	22	30	30	7	0	c	own bed	own bed	19	19	15	15	nothing	nothing	nothing	nothing	1	0								North	Yes
286	9	515	2015-04-15	2011-11-09	3650	m	1978	Employed	University	1975	Employed	High	y	y	0	0	0		16.000	16	104.5	1.045	21	30	30	6	30	y	own bed	own bed	19	19	30	30	nothing	nothing	nothing	nothing	2	1								North	Yes
287	9	518	2015-04-17	2005-10-30	3250	m	1974	Employed	High	1972	Employed	High	y	y	0	2	0		31.700	31.7	138.0	1.38	22	30	30	7	45	y	own bed	own bed	20	20	0	0	nothing	sweet	nothing	nothing	0	0								North	Yes
288	9	518	2015-04-17	2006-11-04	3470	f	1974	Employed	High	1973	Employed	High	y	y	1	0	0		26.800	26.8	129.5	1.295	21	45	45	7	30	y	own bed	own bed	19	19	45	45	nothing	nothing	nothing	nothing	0	0								North	No
289	15	497	2015-04-16	2013-04-11	3190	f	1993	Works at home	Middle	1983	Employed	Middle	y	y	1	0	2		9.800	9.8	80.0	0.8	22	00	0	9	30	n	own bed	own bed	21	21	0	0	nothing	salted	nothing	nothing	3	1								South	No
290	15	497	2015-04-17	2001-04-22	3230	m	1974	Works at home	Middle				y	n	0	0	0		53.000	53	163.0	1.63	22	30	30	6	45	y	own bed	own bed	20	20	15	15	nothing	nothing	nothing	nothing	0	0								South	Yes
291	15	497	2015-04-17	2006-12-30	2990	f	1974	Works at home	Middle	1967	Employed	High	y	y	1	0	0		26.000	26	122.0	1.22	22	00	0	6	45	y	own bed	own bed	20	20	15	15	nothing	nothing	nothing	nothing	0	0								South	No
292	4	502	2015-04-17	2009-05-22	3150	f	1973	Employed	High	1965	Employed	High	y	y	2	0	2		25.000	25	119.0	1.19	22	30	30	7	45	c	own bed	other room	20	20	15	15	milk	nothing	nothing	nothing	0	2								South	No
293	4	491	2015-04-21	2012-11-30	3270	m	1983	Works at home	Middle	1976	Employed	High	y	y	1	0	0		15.000	15	91.0	0.91	22	30	30	7	0	n	parents' bed	own bed	18	18	30	30	milk	sweet	nothing	nothing	1	2								South	Yes
294	4	491	2015-04-21	2002-07-01	1750	m	1958	Employed	University	1963	Employed	University	y	y	0	0	0		53.000	53	165.0	1.65	23	00	0	6	45	y	own bed	own bed	18	18	45	45	milk	sweet	nothing	nothing	0	0								South	Yes
295	9	511	2015-04-21	2014-02-04	3050	f	1982	Employed	High	1977	Employed	High	y	y	1	0	0		10.400	10.4	78.5		21	45	45	8	30	y	own bed	own bed	19	19	30	30	nothing		nothing	nothing	1	2								North	No
297	9	514	2015-04-21	2008-03-14	3700	f	1966	Works at home	High	1967	Employed	High	y	y	1	0	0		25.500	25.5	123.0	1.23	22	00	0	7	30	n	own bed	parents' bed	19	19	30	30	nothing	nothing	nothing	nothing	5	0								North	No
298	9	507	2015-04-21	2012-12-20	3120	f	1977	Unemployed	Middle	1973	Employed	Middle	y	y	1	0	0		11.600	11.6	87.0	0.87	21	30	30	7	45	y	parents' bed	own bed	19	19	0	0	nothing	nothing	nothing	nothing	0	2								North	No
299	9	514	2015-04-15	2007-01-24	3300	f	1974	Employed	High	1970	Employed	High	y	y	0	0	0		32.500	32.5	123.5	1.235	22	00	0	7	30	y	own bed	own bed	19	19	30	30	nothing	nothing	nothing	nothing	0	0								North	No
300	15	508	2015-04-21	2013-05-12	3760	m	1978	Employed	University	1976	Employed	University	y	y	2	0	0		14.400	14.4	88.0		22	30	30	8	0	n	parents' bed	parents' bed	19	19	0	0	nothing	nothing	nothing	nothing	2	1.5								South	Yes
301	4	523	2015-04-21	2012-10-10	3650	m	1981	Works at home	Middle	1986	Employed	Middle	y	y	0	1	3		17.000	17	93.0	0.93	22	00	0	8	0	n	parents' bed	parents' bed	19	19	0	0	other	sweet	nothing	nothing	3	2								South	Yes
302	9	525	2015-04-21	2009-05-19	3320	m	1980	Employed	High	1976	Employed	High	y	y	1	0	0		19.000	19	112.0	1.12	21	30	30	7	15	y	own bed	own bed	19	19	45	45	nothing	nothing	nothing	nothing	1	0								North	Yes
303	9	525	2015-04-21	2004-03-28	2550	f	1980	Employed	High	1976	Employed	High	y	y	0	1	0		32.000	32	139.5	1.395	21	30	30	7	30	y	own bed	own bed	19	19	45	45	nothing	nothing	nothing	nothing	2	0								North	No
304	9	484	2015-04-21	2009-05-02	3350	m	1970	Employed	High	1969	Employed	High	y	y	1	0	0		18.600	18.6	116.0	1.16	22	00	0	7	45	c	own bed	own bed	20	20	0	0	nothing	nothing	nothing	nothing	1	0								North	Yes
305	9	525	2015-04-16	2011-03-16	2780	f	1976	Employed	Middle	1976	Employed	Middle	y	y	4	1	0		16.000	16	99.0	0.99	22	00	0	8	30	y	parents' bed	parents' bed	20	20	0	0	nothing	sweet	nothing	nothing	0	0								North	No
307	9	525	2015-04-10	2007-11-17	3450	m	1970	Employed	High	1969	Employed	Middle	y	y	1	0	0		21.800	21.8	116.5	1.165	22	00	0	7	30	y	own bed	parents' bed	20	20	0	0	nothing	nothing	nothing	nothing	1	0								North	Yes
308	10	505	2015-04-21	2010-03-20	3120	f	1975	Works at home	High	1973	Employed	Middle	y	y	2	0	0		21.000	21	113.6	1.136	22	15	15	8	30	c	own bed	own bed	20	20	0	0	milk	nothing	nothing	nothing	2	0								Center	No
309	4	502	2015-04-22	2009-09-04	3400	f	1977	Works at home	Middle	1966	Employed	High	y	y	1	0	0		22.000	22	115.0	1.15	21	00	0	7	45	y	own bed	own bed	20	20	0	0	milk	nothing	nothing	nothing	0	1								South	No
311	4	502	2015-04-22	2002-07-28	3280	f	1973	Employed	High	1965	Employed	High	y	y	1	1	0		49.000	49	155.0	1.55	22	30	30	7	15	y	own bed	own bed	19	19	30	30	milk	sweet	nothing	nothing	0	0								South	No
312	10	505	2015-04-21	2006-04-12	4560	m	1980	Works at home	High	1968	Employed	High	y	y	1	0	0		35.100	35.1	140.3	1.403	21	30	30	6	30	c	own bed	own bed	19	19	30	30	milk	sweet	nothing	nothing	0	0								Center	Yes
313	4	502	2015-04-22	2009-12-12	2650	f	1969	Employed	High	1970	Employed	High	y	y	0	0	0		20.000	20	108.0	1.08	22	00	0	5	30	n	parents' bed	parents' bed	19	19	15	15	nothing	nothing	nothing	nothing	1	0								South	No
314	9	503	2015-04-21	2008-05-12	2850	f	1969	Employed	University	1970	Employed	High	y	y	0	0	0		22.500	22.5	121.0	1.21	22	00	0	6	45	y	own bed	own bed	19	19	30	30	nothing	nothing	nothing	nothing	0	0								North	No
315	9	513	2015-04-21	2012-09-17	2700	m	1979	Employed	University	1977	Employed	Middle	y	y	0	0	0		12.000	12	90.0	0.9	21	45	45	6	45	y	parents' bed	own bed	19	19	45	45	nothing	salted	nothing	nothing	1	2								North	Yes
316	9	503	2015-04-21	2007-06-15	3310	f	1979	Employed	Middle	1974	Employed	High	y	y	0	1	2		23.500	23.5	128.0	1.28	21	45	45	7	15	y	own bed	own bed	19	19	30	30	nothing	nothing	nothing	nothing	0	0								North	No
317	9	513	2015-04-21	2006-02-23	2920	f	1965	Works at home	High	1961	Employed	High	y	y	0	0	0		27.400	27.4	136.0	1.36	21	45	45	7	30	y	own bed	own bed	20	20	15	15	milk	sweet	nothing	nothing	0	0								North	No
318	9	542	2015-04-21	2014-01-09	2800	f	1984	Employed	High	1982	Employed	High	y	y	0	0	0		9.000	9	75.0		21	30	30	7	0	y	parents' bed	own bed	19	19	15	15	milk	nothing	nothing	nothing	1	2								North	No
319	9	542	2015-04-21	2012-10-23	2400	m	1980	Employed	Middle	1964	Employed	High	y	y	1	0	0		12.000	12	87.0	0.87	22	30	30	7	30	c	own bed	own bed	19	19	0	0	nothing	sweet	nothing	nothing	0	0.5								North	Yes
320	9	554	2015-04-21	2008-02-08	1920	f	1978	Works at home	High	1976	Employed	High	y	y	0	1	0		22.500	22.5	121.5	1.215	21	15	15	7	0	c	parents' bed	own bed	19	19	30	30	milk	sweet	nothing	nothing	1	0								North	No
321	4	523	2015-04-21	2009-06-10	3290	f	1984	Unemployed	High	1980	Employed	High	y	y	0	1	4		38.500	38.5	123.0	1.23	22	45	45	8	30	y	parents' bed	parents' bed	19	19	0	0	nothing	nothing	nothing	nothing	0	0								South	No
322	9	554	2015-04-21	2012-07-20	3200	m	1984	Employed	University	1978	Employed	High	y	y	1	0	0		11.000	11	86.7	0.867	20	00	0	7	0	c	own bed	own bed	19	19	0	0	nothing	nothing	nothing	nothing	1	1								North	Yes
323	15	497	2015-04-21	2013-07-16	2850	f	1979	Works at home	Middle	1971	Unemployed	Middle	y	y	0	1	0		11.000	11	86.0		21	30	30	7	15	n	parents' bed	own bed	19	19	30	30	milk	nothing	nothing	nothing	1	1.25								South	No
324	9	542	2015-04-22	2008-07-19	3790	m	1976	Works at home	High	1969	Employed	High	y	y	1	1	0		24.000	24	125.0	1.25	21	45	45	7	30	y	own bed	own bed	19	19	15	15	nothing	nothing	nothing	nothing	0	0								North	Yes
325	9	542	2015-04-22	2012-02-16	3250	m	1979	Employed	High	1973	Employed	High	y	y	0	0	0		16.000	16	98.0	0.98	20	45	45	7	45	y	own bed	parents' bed	19	19	0	0	nothing	nothing	nothing	nothing	1	0.5								North	Yes
326	9	554	2015-04-22	2011-01-10	4310	m	1988	Works at home	Middle	1981	Employed	Middle	y	y	1	0	0		18.000	18	109.0	1.09	22	30	30	7	45	c	own bed	own bed	21	21	0	0	nothing	sweet	nothing	nothing	0	0.5								North	Yes
327	20	489	2015-04-22	2013-04-01	3250	f	1974	Employed	High	1974	Employed	University	y	y	2	0	0		11.400	11.4	85.0	0.85	21	00	0	7	15	c	own bed	own bed	18	18	45	45	nothing	nothing	nothing	nothing	1	2								North	No
330	9	511	2015-04-22	2012-08-30	2910	m	1976	Works at home	High	1973	Employed	High	y	y	1	0	0		14.800	14.8	92.0	0.92	21	00	0	8	0	c	own bed	own bed	19	19	15	15	nothing	nothing	nothing	nothing	0	2								North	Yes
332	9	522	2015-04-22	2010-10-22	3000	f	1973	Employed	Middle	1972	Employed	Middle	y	y	0	0	0		16.500	16.5	108.0	1.08	23	15	15	8	15	n	other room	parents' bed	19	19	30	30	nothing	nothing	nothing	nothing	1	0								North	No
334	9	517	2015-04-21	2008-07-21	3100	f	1974	Employed	University	1969	Employed	High	y	y	0	1	0		25.000	25	124.0	1.24	20	45	45	7	30	y	parents' bed	parents' bed	19	19	0	0	nothing	nothing	nothing	nothing	0	0								North	No
335	9	517	2015-04-22	2011-09-02	3090	f	1971	Employed	University	1965	Employed	High	y	y	0	0	0		16.000	16	104.0	1.04	21	00	0	7	0	y	parents' bed	parents' bed	19	19	0	0	nothing	nothing	nothing	nothing	0	0.75								North	No
336	9	517	2015-04-22	2012-05-04	4000	m	1982	Other	High	1974	Other	High	y	y	0	0	0		15.000	15	100.0	1	20	30	30	7	30	y	own bed	own bed	18	18	45	45	nothing	nothing	nothing	nothing	0	2								North	Yes
338	9	514	2015-04-22	2012-12-26	4010	m	1975	Employed	High	1968	Employed	Middle	y	y	0	0	0		15.000	15	90.0	0.9	22	30	30	8	0	y	parents' bed	own bed	19	19	30	30	milk	sweet	nothing	nothing	0	3								North	Yes
339	9	515	2015-04-22	2007-02-27	2500	f	1972	Employed	University	1972	Employed	University	y	y	0	1	0		24.000	24	124.0	1.24	21	15	15	6	30	c	own bed	own bed	19	19	0	0	nothing	nothing	nothing	nothing	0	0								North	No
340	9	522	2015-04-22	2010-02-17	2890	f	1976	Employed	University	1973	Employed	High	y	y	1	0	0		18.000	18	107.5	1.075	21	00	0	6	45	y	other room	parents' bed	19	19	30	30	other	nothing	nothing	nothing	1	0								North	No
341	9	515	2015-04-22	2012-06-16	3000	f	1972	Employed	High	1977	Employed	High	y	y	0	0	0		11.200	11.2	86.5	0.865	21	00	0	7	0	n	parents' bed	parents' bed	19	19	30	30	nothing	nothing	nothing	nothing	1	1								North	No
342	9	515	2015-04-21	2006-12-11	3850	m	1975	Employed	High	1970	Employed	Middle	y	y	1	0	0		33.600	33.6	138.0	1.38	21	30	30	7	30	c	own bed	own bed	20	20	0	0	nothing	nothing	nothing	nothing	0	0								North	Yes
345	9	515	2015-04-16	2003-06-17	3100	m	1971	Employed	Middle	1966	Employed	High	y	y	0	1	0		43.500	43.5	154.0	1.54	22	30	30	7	0	c	own bed	own bed	20	20	0	0	nothing	nothing	nothing	nothing	0	0								North	Yes
346	4	491	2015-04-22	2009-06-17	3580	f	1980	Unemployed	High	1979	Employed	High	y	y	0	1	0		17.000	17	108.0	1.08	22	00	0	8	0	n	parents' bed	own bed	19	19	0	0	nothing	nothing	nothing	nothing	0	0								South	No
347	9	515	2015-04-16	2002-08-23	3650	f	1971	Employed	High	1969	Employed	High	y	y	1	1	0		47.600	47.6	163.0	1.63	22	30	30	7	0	c	own bed	own bed	20	20	0	0	nothing	nothing	nothing	nothing	0	0								North	No
348	9	485	2015-04-22	2004-03-23	3200	m	1968	Employed	High	1966	Employed	University	y	y	0	0	0		40.300	40.3	141.5	1.415	23	00	0	8	15	y	own bed	own bed	19	19	45	45	nothing	nothing	nothing	nothing	2	0								North	Yes
349	10	505	2015-04-22	2013-08-13	4000	m	1976	Works at home	Elementary	1964	Unemployed	Elementary	y	y	3	0	0		13.500	13.5	93.0		22	30	30	7	30	n	parents' bed	own bed	20	20	45	45	milk	nothing	milk	nothing	3	2.5								Center	Yes
350	17	534	2015-04-22	2013-08-31	2270	m	1982	Employed	High	1981	Employed	High	y	y	1	0	2		10.500	10.5	76.0		21	30	30	6	30	y	own bed	own bed	19	19	15	15	milk	fruit & salted	nothing	nothing	5	2	y	y						North	Yes
351	4	491	2015-04-22	2009-09-28	2700	f	1979	Works at home	High	1976	Employed	High	y	y	1	0	0		21.000	21	116.0	1.16	23	15	15	7	30	y	own bed	own bed	20	20	0	0	nothing	sweet	nothing	nothing	1	0								South	No
352	4	523	2015-04-22	2011-08-02	3390	f	1983	Works at home	Middle	1977	Employed	High	y	y	1	0	2		17.000	17	99.5	0.995	22	30	30	8	30	y	parents' bed	parents' bed	19	19	45	45	nothing	sweet	nothing	nothing	0	0								South	No
354	15	504	2015-04-23	2013-02-27	2350	f	1979	Works at home	High	1978	Employed	High	y	y	0	0	0		9.000	9	71.0	0.71	23	30	30	8	0	y	own bed	own bed	20	20	30	30	nothing	nothing	nothing	nothing	0	2								South	No
355	9	515	2015-04-23	2007-07-28	3200	m	1973	Employed	High	1969	Employed	High	y	y	1	0	0		24.000	24	122.0	1.22	21	30	30	7	15	c	own bed	own bed	20	20	15	15	nothing	nothing	nothing	nothing	0	0								North	Yes
356	9	546	2015-04-23	2009-07-05	3910	f	1975	Employed	High	1973	Employed	High	y	y	1	0	0		24.100	24.1	117.5	1.175	22	30	30	7	15	y	own bed	own bed	20	20	15	15	milk	nothing	nothing	nothing	0	0								North	No
357	9	515	2015-04-23	2004-06-25	3920	f	1975	Employed	University	1976	Employed	High	y	y	0	1	0		45.000	45	160.0	1.6	22	30	30	7	0	c	own bed	own bed	20	20	0	0	nothing	nothing	nothing	nothing	0	0								North	No
359	9	546	2015-04-23	2013-12-14	2850	f	1988	Student	University	1989	Employed	High	y	y	0	0	0		9.700	9.7	76.0		21	30	30	7	45	n	own bed	own bed	19	19	0	0	milk	nothing	milk	nothing	2	2								North	No
360	9	514	2015-04-23	2013-01-29	1800	m	1977	Works at home	University	1980	Employed	Middle	y	y	1	0	0		12.000	12	82.5	0.825	21	15	15	7	30	c	other room	parents' bed	20	20	0	0	nothing	nothing	nothing	nothing	1	1.5								North	Yes
361	9	515	2015-04-15	2011-11-15	2900	f	1977	Unemployed	University	1977	Employed	High	y	y	0	0	0		11.600	11.6	92.0	0.92	22	00	0	7	45	y	own bed	own bed	19	19	0	0	nothing	nothing	nothing	nothing	2	1.75		y						North	No
363	9	515	2015-04-10	2009-11-28	3150	f	1979	Unemployed	High	1980	Employed	High	y	y	0	2	2		18.500	18.5	114.0	1.14	21	30	30	7	45	y	own bed	own bed	19	19	30	30	nothing	nothing	nothing	nothing	0	0								North	No
364	9	484	2015-04-23	2012-01-12	3330	m	1979	Works at home	High	1980	Employed	High	y	y	0	0	0		14.400	14.4	95.0	0.95	21	15	15	8	0	y	other room	own bed	19	19	15	15	juice	nothing	nothing	nothing	0	0								North	Yes
365	9	484	2015-04-23	2001-05-01	4030	m	1972	Employed	High	1975	Employed	High	y	y	0	2	0		59.000	59	178.0	1.78	23	15	15	7	15	c	own bed	own bed	20	20	0	0	nothing	sweet	nothing	nothing	2	0								North	Yes
366	9	542	2015-04-23	2006-10-13	2750	m	1974	Works at home	Middle	1969	Employed	Middle	y	y	0	1	0		34.000	34	132.0	1.32	22	00	0	7	15	c	own bed	own bed	19	19	15	15	nothing	nothing	nothing	nothing	3	0								North	Yes
367	16	548	2015-04-22	2010-04-23	3720	m	1976	Employed	Middle	1976	Employed	High	y	y	0	1	0		22.000	22	109.0	1.09	21	00	0	7	45	y	other room	own bed	19	19	30	30	nothing	nothing	nothing	nothing	1	0								Center	Yes
368	9	542	2015-04-23	2013-06-23	3190	m	1988	Employed	High	1987	Employed	High	y	y	0	0	0		11.000	11	80.0		22	00	0	8	0	n	own bed	parents' bed	19	19	0	0	milk	sweet	nothing	nothing	3	3								North	Yes
369	9	559	2015-04-23	2011-02-02	3700	m	1971	Works at home	Middle	1973	Employed	Middle	y	y	1	0	0		17.000	17	100.0	1	23	00	0	7	45	c	own bed	parents' bed	20	20	15	15	nothing	nothing	nothing	nothing	1	2								North	Yes
370	9	511	2015-04-23	2006-07-08	3900	m	1972	Employed	University	1974	Employed	High	y	y	0	1	0		28.000	28	135.5	1.355	21	30	30	7	30	c	own bed	own bed	19	19	0	0	nothing	nothing	nothing	nothing	0	0								North	Yes
371	17	534	2015-04-23	2005-11-26	3480	m	1976	Employed	Middle	1974	Employed	High	y	y	0	1	0		61.000	61	142.5	1.425	22	00	0	7	15	y	own bed	parents' bed	19	19	0	0	nothing	nothing	nothing	nothing	1	0								North	Yes
372	20	565	2015-04-23	2013-11-24	3450	m	1987	Student	High	1984	Employed	High	y	y	0	0	0		9.000	9	76.0		21	00	0	7	0	y	own bed	own bed	19	19	0	0	milk	nothing	milk	nothing	4	2								North	Yes
373	9	511	2015-04-23	2011-04-21	3400	m	1971	Employed	University	1965	Employed	High	y	y	1	0	0		17.000	17	107.0	1.07	22	30	30	6	45	c	other room	parents' bed	20	20	15	15	nothing	nothing	nothing	nothing	2	0								North	Yes
374	9	531	2015-04-16	2012-03-27	3400	m	1985	Employed	University				y	y	0	0	0	n	15.500	15.5	100.0	1	22	30	30	7	30	y	parents' bed	own bed	19	19	0	0	milk	nothing	nothing	nothing	0	1								North	Yes
375	9	531	2015-04-16	2003-02-26	3000	m	1961	Other	High				y	y	3	0	0	n	50.000	50	163.0	1.63	23	15	15	7	0	c	own bed	own bed	20	20	30	30	nothing	nothing	nothing	nothing	0	0								North	Yes
377	9	531	2015-04-17	2007-06-18	2800	m	1981	Works at home	High	1974	Employed	High	y	y	0	1	0		34.000	34	133.0	1.33	21	00	0	7	30	n	own bed	own bed	19	19	0	0	nothing	nothing	nothing	nothing	1	0								North	Yes
378	9	531	2015-04-21	2013-04-16	3240	m	1981	Works at home	Middle	1979	Employed	High	y	y	0	1	0		13.000	13	89.0	0.89	22	30	30	8	45	y	own bed	own bed	20	20	0	0	nothing	nothing	nothing	nothing	0	1.5								North	Yes
379	9	531	2015-04-21	2007-11-10	3400	m	1979	Employed	High	1955	Employed	University	y	y	0	1	0		25.000	25	122.0	1.22	22	00	0	7	0	c	own bed	own bed	19	19	30	30	nothing	nothing	nothing	nothing	0	0								North	Yes
380	9	531	2015-04-21	2005-05-23	2300	f	1973	Works at home	High	1970	Employed	High	y	y	1	0	0		33.000	33	130.0	1.3	22	15	15	7	30	y	own bed	own bed	20	20	0	0	nothing	nothing	nothing	nothing	1	0								North	No
381	9	531	2015-04-21	2006-10-22	3470	m	1980	Works at home	High	1979	Other	Middle	y	y	0	2	0		26.000	26	145.0	1.45	21	30	30	7	30	c	own bed	own bed	20	20	0	0	nothing	nothing	nothing	nothing	0	0								North	Yes
383	9	531	2015-04-24	2008-11-21	4040	m	1975	Employed	University	1975	Employed	University	y	y	1	1	0		26.000	26	125.0	1.25	21	30	30	7	0	c	own bed	own bed	19	19	30	30	nothing	nothing	nothing	nothing	0	0								North	Yes
384	9	531	2015-04-24	2007-09-09	3000	m	1974	Employed	High	1971	Employed	High	y	y	1	0	0		27.000	27	135.0	1.35	21	30	30	6	30	c	own bed	own bed	19	19	30	30	nothing	fruit	nothing	nothing	0	0								North	Yes
385	9	531	2015-04-24	2009-03-02	2700	m	1975	Employed	High	1978	Employed	High	y	y	0	0	0		22.000	22	118.0	1.18	22	00	0	7	30	y	own bed	own bed	19	19	0	0	nothing	nothing	nothing	nothing	0	0								North	Yes
386	9	531	2015-04-24	2010-02-02	3500	m	1975	Employed	University	1975	Employed	University	y	y	1	0	0		18.000	18	108.0	1.08	21	30	30	7	30	c	own bed	own bed	19	19	30	30	nothing	nothing	nothing	nothing	1	0								North	Yes
388	17	534	2015-04-24	2011-06-12	3480	f	1971	Employed	University	1972	Employed	High	y	y	0	0	0		13.500	13.5	100.0	1	22	00	0	7	0	y	parents' bed	own bed	19	19	0	0	nothing	nothing	nothing	nothing	5	0								North	No
390	4	502	2015-04-24	2011-08-30	2650	f	1984	Works at home	High	1983	Employed	High	y	y	1	0	3		20.000	20	91.0	0.91	21	30	30	8	0	y	own bed	own bed	19	19	0	0	milk	nothing	nothing	nothing	1	2								South	No
391	4	502	2015-04-24	2010-11-12	2930	m	1975	Unemployed	High	1970	Employed	High	y	y	1	0	0		19.000	19	105.0	1.05	22	30	30	7	0	y	parents' bed	parents' bed	19	19	0	0	milk	other	nothing	nothing	0	2								South	Yes
392	15	497	2015-04-21	2004-04-23	3400	f	1980	Unemployed	High	1977	Employed	High	y	y	0	1	0		38.000	38	144.0	1.44	23	00	0	7	0	c	other room	own bed	20	20	30	30	nothing	nothing	nothing	nothing	0	0								South	No
393	15	497	2015-04-22	2010-05-21	3960	m	1975	Works at home	High	1970	Employed	High	y	y	1	0	0		20.500	20.5	114.0	1.14	21	30	30	7	30	n	parents' bed	parents' bed	19	19	30	30	nothing	nothing	nothing	nothing	0	0								South	Yes
394	4	491	2015-04-24	2013-07-19	3330	f	1975	Works at home	Middle	1974	Employed	High	y	y	0	0	0		12.200	12.2	83.0		22	00	0	7	30	n	parents' bed	parents' bed	19	19	30	30	nothing	fruit	nothing	nothing	0	2								South	No
395	15	497	2015-04-22	2008-09-15	3180	m	1975	Works at home	High	1970	Employed	High	y	y	1	0	0		21.000	21	120.0	1.2	21	30	30	7	30	n	parents' bed	parents' bed	19	19	30	30	nothing	nothing	nothing	nothing	0	1.5								South	Yes
396	15	497	2015-04-23	2002-12-03	3960	m	1970	Works at home	Middle	1968	Employed	Middle	y	y	1	0	0		53.000	53	158.5	1.585	21	00	0	7	30	y	own bed	own bed	20	20	30	30	nothing	nothing	nothing	nothing	0	0								South	Yes
397	15	516	2015-04-24	2013-09-03	3600	m	1977	Works at home	High	1978	Other	High	y	y	1	0	0		11.000	11	80.0		24	00	0	7	30	y	own bed	own bed	21	21	30	30	nothing	fruit	nothing	nothing	2	0.5								South	Yes
398	9	510	2015-04-21	2003-05-29	3150	m	1966	Employed	Middle	1964	Employed	Middle	y	y	1	0	0		36.700	36.7	151.0	1.51	22	00	0	7	0	c	own bed	own bed	19	19	30	30	nothing	sweet	nothing	nothing	0	0								North	Yes
399	9	510	2015-04-23	2009-08-13	3370	m	1973	Employed	University	1972	Employed	University	y	y	0	1	0		23.800	23.8	122.0	1.22	21	30	30	7	15	c	own bed	own bed	20	20	0	0	nothing	nothing	nothing	nothing	0	0								North	Yes
401	9	510	2015-04-23	2011-05-19	2450	f	1973	Employed	University	1972	Employed	University	y	y	1	0	0		15.000	15	100.0	1	21	30	30	7	15	c	own bed	own bed	20	20	0	0	nothing	nothing	nothing	nothing	1	0.75								North	No
402	15	541	2015-04-23	2012-03-02	3100	m	1979	Works at home	High	1976	Employed	High	y	y	0	0	0		13.000	13	93.0	0.93	21	00	0	8	0	y	parents' bed	parents' bed	20	20	15	15	juice	salted	nothing	nothing	0	1								South	Yes
403	15	541	2015-04-23	2005-10-21	3670	m	1977	Works at home	Middle	1975	Employed	Middle	y	y	1	0	0		38.000	38	144.0	1.44	21	00	0	7	15	c	other room	other room	20	20	30	30	nothing	salted	nothing	nothing	0	0								South	Yes
404	15	541	2015-04-24	2004-11-13	3600	m	1977	Works at home	Middle	1974	Employed	Middle	y	y	0	0	0		33.500	33.5	138.0	1.38	23	00	0	7	15	n	own bed	own bed	20	20	30	30	nothing	nothing	nothing	nothing	0	0								South	Yes
405	9	542	2015-04-24	2003-10-18	2750	f	1975	Unemployed	Middle	1970	Employed	Middle	y	y	0	0	0		34.000	34	138.0	1.38	22	30	30	7	0	y	parents' bed	parents' bed	19	19	30	30	nothing	sweet	nothing	nothing	1	0								North	No
407	9	517	2015-04-24	2002-05-14	2850	f	1971	Employed	University	1966	Employed	University	y	y	0	1	0		37.000	37	136.0	1.36	21	45	45	7	0	c	own bed	own bed	20	20	0	0	nothing	nothing	nothing	nothing	0	0								North	No
408	9	517	2015-04-24	2008-02-01	3770	m	1975	Employed	High	1973	Employed	Middle	y	y	0	0	0		22.000	22	125.0	1.25	21	30	30	7	15	y	own bed	own bed	19	19	30	30	nothing	nothing	nothing	nothing	0	0								North	Yes
409	9	517	2015-04-23	2008-07-29	3280	m	1966	Employed	University	1964	Employed	High	y	y	0	0	0		30.000	30	129.0	1.29	21	30	30	6	45	y	own bed	own bed	19	19	30	30	nothing	nothing	nothing	nothing	0	0								North	Yes
410	4	502	2015-04-24	2013-04-09	2340	f	1984	Works at home	High	1983	Employed	High	y	y	1	0	2		12.000	12	97.0	0.97	22	15	15	7	30	n	parents' bed	parents' bed	19	19	0	0	milk	nothing	nothing	nothing	2	1.75								South	No
411	20	565	2015-04-28	2012-12-23	3480	f	1979	Works at home	Middle	1977	Employed	Middle	y	y	3	0	1		14.000	14	88.0	0.88	21	15	15	5	45	c	own bed	own bed	19	19	0	0	milk	nothing	nothing	nothing	1	3								North	No
412	20	489	2015-04-28	2012-03-04	3080	f	1975	Employed	High	1978	Employed	High	y	y	1	0	0		16.000	16	101.0	1.01	21	30	30	6	45	y	own bed	own bed	19	19	0	0	nothing	nothing	nothing	nothing	1	1.5								North	No
413	9	510	2015-04-28	2009-12-23	3450	f	1980	Works at home	University	1980	Employed	High	y	y	0	2	0		17.000	17	107.5	1.075	20	30	30	7	30	c	own bed	own bed	17	17	45	45	nothing	nothing	nothing	nothing	0	0								North	No
415	9	503	2015-04-28	2012-01-12	3950	f	1984	Employed	Middle	1981	Employed	High	y	y	1	0	0		13.000	13	94.5	0.945	20	30	30	8	30	c	parents' bed	parents' bed	19	19	0	0	nothing	nothing	nothing	nothing	0	2								North	No
416	15	516	2015-04-28	2014-03-21	3150	f	1977	Works at home	University	1971	Other	Middle	y	y	1	0	4		10.000	10	80.0		22	00	0	7	0	n	own bed	parents' bed	20	20	45	45	nothing	nothing	nothing	nothing	5	0.5								South	No
417	20	489	2015-04-28	2014-04-09	3550	m	1986	Unemployed	High	1980	Employed	High	y	y	0	0	0		10.100	10.1	79.0		22	00	0	7	0	y	parents' bed	own bed	19	19	30	30	milk	nothing	milk	nothing	1	2								North	Yes
418	9	514	2015-04-28	2012-10-09	3600	f	1974	Employed	High	1974	Employed	University	y	y	2	0	0		15.000	15	96.0	0.96	23	15	15	8	30	n	parents' bed	own bed	19	19	0	0	nothing	nothing	nothing	nothing	0	1.5								North	No
419	15	516	2015-04-28	2013-04-25	3200	m	1983	Works at home	Middle	1979	Employed	Middle	y	y	3	0	0		12.000	12	83.0	0.83	24	00	0	10	45	n	parents' bed	own bed	21	21	0	0	nothing	nothing	nothing	fruit & sweet	0	2								South	Yes
420	9	559	2015-04-28	2013-10-17	3400	f	1976	Employed	High	1976	Employed	High	y	y	1	0	0		11.000	11	82.0		21	00	0	6	45	n	own bed	own bed	19	19	30	30	nothing	nothing	nothing	nothing	0	1.5								North	No
421	9	507	2015-04-28	2013-01-10	2500	f	1981	Works at home	Middle	1976	Employed	Middle	y	y	2	0	0		10.000	10	84.0	0.84	22	30	30	8	0	n	own bed	own bed	19	19	30	30	milk	nothing	nothing	nothing	2	2								North	No
422	15	516	2015-04-28	2006-10-13	5200	m	1976	Works at home	Middle	1971	Unemployed	Middle	y	y	3	0	0		30.000	30	136.0	1.36	23	15	15	7	0	y	own bed	own bed	22	22	0	0	nothing	nothing	nothing	nothing	1	0								South	Yes
423	9	484	2015-04-28	2014-01-15	3490	m	1980	Employed	High	1980	Employed	High	y	y	1	0	0		11.700	11.7	79.0		21	30	30	7	0	c	parents' bed	parents' bed	19	19	0	0	juice	nothing	nothing	nothing	4	1.75								North	Yes
424	9	484	2015-04-28	2009-03-17	3000	f	1989	Employed	High	1985	Employed	High	y	y	0	0	1		16.900	16.9	116.0	1.16	21	15	15	7	0	n	parents' bed	own bed	20	20	0	0	nothing	nothing	nothing	nothing	1	0								North	No
425	9	521	2015-04-28	2007-04-23	3070	m	1979	Employed	Middle	1967	Employed	Middle	y	y	1	0	0		23.000	23	127.0	1.27	21	00	0	6	45	c	own bed	own bed	19	19	30	30	nothing	nothing	nothing	nothing	2	0								North	Yes
426	9	554	2015-04-28	2002-05-19	3440	m	1968	Employed	High	1966	Employed	Middle	y	n	1	1	0		54.800	54.8	156.0	1.56	23	00	0	7	15	c	own bed	own bed	19	19	30	30	nothing	nothing	nothing	fruit	0	0.5								North	Yes
427	9	554	2015-04-28	2005-01-18	3450	f	1963	Works at home	Middle	1974	Employed	High	y	y	0	0	0		45.800	45.8	138.5	1.385	21	30	30	7	15	y	own bed	own bed	19	19	30	30	nothing	sweet	nothing	nothing	0	0								North	No
428	9	503	2015-04-28	2001-06-18	4150	m	1962	Employed	High	1958	Employed	High	y	y	1	0	0		60.000	60	162.0	1.62	22	00	0	7	15	y	own bed	own bed	19	19	15	15	nothing	nothing	nothing	nothing	0	0								North	Yes
429	17	534	2015-04-28	2006-08-05	3750	m	1969	Employed	High	1972	Employed	High	y	y	1	0	0		32.000	32	136.0	1.36	21	30	30	6	0	c	parents' bed	parents' bed	20	20	0	0	nothing	nothing	nothing	nothing	1	0								North	Yes
431	17	534	2015-04-28	2009-02-10	3720	f	1979	Employed	High	1976	Employed	High	y	y	1	0	0		19.000	19	116.0	1.16	21	00	0	7	0	c	other room	own bed	19	19	30	30	nothing	nothing	nothing	nothing	0	0								North	No
432	9	542	2015-04-28	2008-06-13	3980	m	1981	Works at home	Middle	1975	Employed	Elementary	y	y	0	3	0		23.000	23	121.0	1.21	22	00	0	7	0	c	own bed	own bed	19	19	0	0	nothing	nothing	nothing	nothing	0	0								North	Yes
433	9	542	2015-04-28	2008-07-23	3450	m	1978	Employed	High	1975	Employed	High	y	y	1	0	0		26.000	26	120.0	1.2	22	00	0	7	15	c	parents' bed	parents' bed	20	20	0	0	milk	sweet	nothing	nothing	1	0								North	Yes
434	4	491	2015-04-28	2004-12-29	2400	f	1974	Works at home	Middle	1970	Employed	High	y	y	2	0	0		40.500	40.5	150.0	1.5	22	15	15	7	0	y	own bed	own bed	19	19	15	15	nothing	nothing	nothing	nothing	2	0								South	No
435	4	491	2015-04-28	2004-12-29	2030	m	1974	Works at home	Middle	1970	Employed	High	y	y	2	0	0		28.000	28	134.0	1.34	21	15	15	6	30	y	own bed	own bed	19	19	15	15	nothing	nothing	nothing	nothing	1	0								South	Yes
436	9	531	2015-04-16	2006-12-02	2820	f	1974	Works at home	Middle	1970	Employed	High	y	y	1	0	0		30.000	30	130.0	1.3	21	30	30	7	30	c	parents' bed	parents' bed	19	19	30	30	nothing	fruit & salted	nothing	nothing	0	0								North	No
437	9	531	2015-04-16	2008-08-28	2785	f	1980	Employed	High	1977	Employed	High	y	y	1	0	0		22.500	22.5	119.0	1.19	21	00	0	8	0	y	own bed	own bed	19	19	0	0		sweet	nothing	nothing	0	0								North	No
438	9	531	2015-04-16	2010-04-04	3300	m	1982	Employed	High	1972	Employed	High	y	n	0	0	0		18.000	18	110.0	1.1	21	30	30	6	45	y	own bed	own bed	19	19	30	30	nothing	other	nothing	nothing	0	0								North	Yes
439	9	531	2015-04-23	2011-11-09	2750	m	1986	Employed	High	1981	Employed	High	y	y	0	0	0		15.000	15	90.0	0.9	22	00	0	8	0	n	parents' bed	parents' bed	18	18	45	45		nothing	nothing	nothing	0	0.25								North	Yes
440	9	546	2015-04-29	2014-01-05	2060	m	1980	Employed	University	1979	Employed	University	y	y	0	0	0		10.600	10.6	80.0		22	00	0	6	45	y	parents' bed	parents' bed	19	19	15	15	nothing	nothing	nothing	nothing	1	2								North	Yes
441	17	534	2015-04-29	2013-09-17	3590	m	1984	Employed	High	1978	Employed	High	y	y	0	0	0		11.200	11.2	85.0		20	15	15	5	30	y	parents' bed	parents' bed	18	18	30	30	juice	nothing	nothing	nothing	5	2.5								North	Yes
442	9	546	2015-04-29	2014-01-14	3990	m	1975	Works at home	Middle	1970	Unemployed	Middle	y	y	2	0	1		11.700	11.7	82.5		23	15	15	7	45	n	own bed	own bed	20	20	0	0	milk	nothing	juice	nothing	3	0.5								North	Yes
444	17	534	2015-04-29	2005-04-22	3500	m	1975	Employed	Middle	1973	Employed	Middle	y	y	0	1	0		39.000	39	146.0	1.46	21	00	0	8	30	c	own bed	own bed	19	19	30	30	nothing	nothing	nothing	nothing	0	0								North	Yes
445	9	559	2015-04-29	2009-10-16	3610	m	1974	Employed	University	1970	Employed	High	y	y	0	1	0		21.000	21	111.0	1.11	21	45	45	7	45	c	own bed	own bed	20	20	15	15	nothing	nothing	nothing	nothing	1	0								North	Yes
446	9	558	2015-04-29	2007-09-20	3190	m	1975	Employed	High	1973	Employed	High	y	y	1	0	4		28.000	28	117.5	1.175	22	00	0	7	0	y	own bed	own bed	20	20	0	0	nothing	nothing	nothing	nothing	0	0								North	Yes
447	9	517	2015-04-28	2003-09-30	4150	m	1970	Employed	High	1967	Employed	High	y	y	1	0	0		68.000	68	166.0	1.66	21	30	30	6	15	c	own bed	own bed	19	19	30	30	nothing	nothing	nothing	nothing	1	0.75								North	Yes
449	9	525	2015-04-29	2012-07-09	2050	m	1975	Works at home	Middle	1973	Employed	High	y	y	1	0	0		15.900	15.9	100.0	1	20	45	45	8	15	c	other room	own bed	19	19	0	0	milk	sweet	nothing	nothing	0	0								North	Yes
450	9	525	2015-04-29	2012-12-28	1980	f	1983	Employed	University	1976	Employed	High	y	y	0	0	0		11.800	11.8	90.0	0.9	23	00	0	7	30	y	parents' bed	own bed	19	19	0	0	nothing	nothing	nothing	nothing	0	1.5								North	No
451	9	521	2015-04-29	2004-04-15	2900	f	1970	Employed	University	1968	Employed	University	y	y	2	1	1		54.000	54	150.0	1.5	22	15	15	6	45	c	own bed	own bed	20	20	0	0	nothing	nothing	nothing	nothing	1	0								North	No
452	9	518	2015-04-29	2013-06-25	3600	f	1972	Employed	University	1971	Employed	University	y	y	0	0	0		12.500	12.5	87.5		21	45	45	7	15	y	parents' bed	own bed	19	19	30	30	nothing	nothing	nothing	nothing	2	2	y							North	No
453	9	521	2015-04-29	2001-12-06	3500	f	1970	Works at home	Middle	1969	Employed	Middle	y	y	1	0	0		46.000	46	150.0	1.5	22	30	30	7	30	y	parents' bed	parents' bed	19	19	0	0	nothing	nothing	nothing	nothing	0	0								North	No
454	9	503	2015-04-29	2011-04-13	3420	m	1979	Employed	Middle	1975	Employed	High	y	y	1	0	0		18.500	18.5	103.0	1.03	20	30	30	6	0	c	own bed	own bed	19	19	0	0	nothing	nothing	nothing	nothing	0	0								North	Yes
455	9	503	2015-04-29	2008-09-12	3280	m	1979	Employed	Middle	1975	Employed	High	y	y	0	1	0		25.000	25	123.0	1.23	21	30	30	6	0	c	other room	own bed	19	19	0	0	nothing	nothing	nothing	nothing	2	0								North	Yes
456	4	491	2015-04-29	2009-09-04	3300	f	1977	Employed	University	1980	Employed	University	y	y	1	0	1		20.000	20	117.0	1.17	21	00	0	7	0	y	own bed	own bed	20	20	15	15	nothing	nothing	nothing	nothing	0	0								South	No
457	9	510	2015-04-29	2002-09-20	2730	f	1970	Works at home	High	1970	Employed	Middle	y	y	0	2	0		45.000	45	158.5	1.585	22	30	30	6	45	c	own bed	own bed	20	20	0	0	nothing	nothing	nothing	nothing	0	0								North	No
458	4	491	2015-04-29	2008-07-15	3600	m	1977	Employed	University	1980	Employed	University	y	y	0	1	1		22.500	22.5	120.3	1.203	21	30	30	7	0	y	own bed	own bed	20	20	15	15	nothing	nothing	nothing	nothing	0	0								South	Yes
459	9	518	2015-04-29	2012-06-14	3660	m	1980	Employed	University	1979	Employed	University	y	y	0	0	0		12.800	12.8	96.5	0.965	23	15	15	8	0	y	own bed	parents' bed	20	20	30	30	milk	nothing	nothing	nothing	1	3								North	Yes
460	16	548	2015-04-29	2005-09-19	3090	f	1970	Works at home	Middle	1971	Employed	Middle	y	y	0	0	0		20.500	20.5	120.0	1.2	22	00	0	7	45	y	own bed	parents' bed	19	19	45	45	nothing	nothing	nothing	nothing	1	0								Center	No
461	9	485	2015-04-29	2001-12-25	2900	m	1970	Employed	High	1970	Employed	Middle	y	y	1	0	0		30.600	30.6	144.5	1.445	22	30	30	7	30	c	own bed	own bed	20	20	0	0	nothing	nothing	nothing	nothing	1	0								North	Yes
462	9	485	2015-04-29	2002-08-02	3250	f	1972	Employed	High	1970	Employed	High	y	y	1	0	0		34.100	34.1	149.0	1.49	23	00	0	7	30	y	own bed	own bed	20	20	30	30	nothing	nothing	nothing	nothing	1	0								North	No
466	15	519	2015-04-29	2012-04-02	3280	m	1988	Employed	High	1986	Employed	High	y	y	0	1	0		12.000	12	94.0	0.94	22	30	30	6	45	y	parents' bed	own bed	20	20	45	45	juice	salted	nothing	nothing	1	0.5								South	Yes
467	15	519	2015-04-29	2010-11-19	2960	m	1987	Works at home	Middle	1986	Employed	Middle	y	y	2	0	0		17.500	17.5	102.0	1.02	22	00	0	6	15	c	own bed	own bed	21	21	0	0	juice	nothing	juice	nothing	0	0								South	Yes
468	15	519	2015-04-29	2008-05-11	2850	f	1987	Unemployed	Middle	1986	Employed	Middle	y	y	1	1	0		20.000	20	113.0	1.13	21	15	15	7	0	c	own bed	own bed	20	20	15	15	nothing	nothing	nothing	nothing	0	0								South	No
469	15	519	2015-04-28	2010-05-20	3420	f	1982	Employed	University	1983	Employed	University	y	y	0	1	0		26.000	26	114.0	1.14	22	15	15	7	0	y	own bed	own bed	20	20	0	0	nothing	sweet	nothing	nothing	0	0								South	No
470	15	519	2015-04-29	2008-09-18	3400	m	1982	Employed	High	1980	Employed	Middle	y	y	0	1	0		22.000	22	116.0	1.16	23	30	30	6	30	y	parents' bed	own bed	20	20	30	30	nothing	nothing	nothing	nothing	1	0	y							South	Yes
473	9	554	2015-04-30	2009-08-27	2710	m	1980	Works at home	High	1973	Employed	University	y	y	1	1	0		22.000	22	114.5	1.145	21	30	30	8	15	c	own bed	parents' bed	19	19	30	30	nothing	sweet	nothing	nothing	2	0								North	Yes
474	9	554	2015-04-30	2010-05-31	2690	m	1979	Employed	High	1976	Employed	High	y	y	0	1	0		16.700	16.7	101.0	1.01	21	30	30	7	15	c	own bed	own bed	19	19	0	0	nothing	nothing	nothing	nothing	0	0								North	Yes
475	9	515	2015-04-29	2007-10-07	2500	m	1973	Employed	University	1973	Employed	University	y	y	1	1	0		20.000	20	123.0	1.23	21	45	45	7	30	c	own bed	own bed	19	19	30	30	nothing	sweet	nothing	nothing	0	0								North	Yes
476	9	522	2015-04-30	2010-11-06	3130	f	1981	Works at home	University	1981	Employed	University	y	y	0	1	0		18.800	18.8	109.0	1.09	21	00	0	7	0	y	own bed	own bed	19	19	45	45	nothing	nothing	nothing	nothing	0	2								North	No
477	17	534	2015-04-30	2013-04-23	3800	f	1973	Employed	High	1972	Employed	Middle	y	y	0	0	1		10.500	10.5	85.0	0.85	22	30	30	8	0	y	parents' bed	own bed	18	18	15	15	juice	sweet	nothing		1	2								North	No
478	9	559	2015-04-30	2011-10-27	3300	m	1982	Other	University	1976	Employed	University	y	y	0	1	0		16.000	16	100.0	1	23	30	30	9	0	n	own bed	own bed	21	21	0	0	juice	nothing	nothing	nothing	1	1								North	Yes
479	9	522	2015-04-30	2011-02-10	3380	f	1977	Employed	High	1978	Employed	High	y	y	0	0	0		16.100	16.1	101.0	1.01	22	00	0	7	15	y	own bed	own bed	19	19	45	45	nothing	nothing	nothing	nothing	1	0								North	No
480	9	522	2015-04-29	2011-02-12	3170	f	1974	Works at home	High	1980	Employed	High	y	y	0	1	0		14.000	14	93.0	0.93	21	30	30	8	15	y	other room	own bed	19	19	45	45	milk	nothing	nothing	nothing	1	0								North	No
481	9	522	2015-04-29	2011-01-04	3630	f	1982	Employed	High	1969	Employed	High	y	y	0	0	0		17.000	17	105.0	1.05	20	00	0	6	30	y	other room	own bed	19	19	15	15	nothing	sweet	other	nothing	1	0								North	No
482	15	508	2015-04-30	2011-05-29	3350	f	1972	Employed	High	1970	Employed	High	y	y	0	0	0		14.700	14.7	97.0	0.97	22	00	0	7	30	n	parents' bed	parents' bed	20	20	0	0	nothing	nothing	nothing	nothing	1	0								South	No
483	9	558	2015-04-30	2013-09-02	4100	m	1980	Employed	University	1979	Employed	University	y	y	0	0	0		14.500	14.5	88.0		21	15	15	7	30	y	other room	own bed	19	19	30	30	milk	nothing	milk	nothing	1	2								North	Yes
484	9	517	2015-04-30	2002-05-16	2800	f	1969	Employed	High	1966	Employed	High	y	y	1	0	0		47.000	47	155.0	1.55	21	30	30	6	30	y	own bed	own bed	19	19	30	30	nothing	nothing	nothing	nothing	0	0								North	No
485	9	558	2015-04-30	2013-12-02	3050	m	1970	Employed	University	1968	Employed	University	y	y	0	0	0		10.100	10.1	78.0		22	00	0	7	15	y	parents' bed	own bed	19	19	15	15	nothing	nothing	nothing	nothing	2	2								North	Yes
486	15	508	2015-04-30	2011-06-03	3470	m	1980	Works at home	Middle	1975	Employed	Middle	y	y	1	0	0		15.300	15.3	98.5	0.985	22	00	0	7	30	y	own bed	own bed	20	20	30	30	nothing	nothing	nothing	nothing	0	3								South	Yes
487	9	558	2015-04-30	2010-10-12	2650	f	1987	Unemployed	Middle	1987	Employed	High	n	n	0	0	4		14.200	14.2	100.0	1	22	00	0	7	30	y	other room	own bed	20	20	0	0	milk	nothing	nothing	nothing	0	0								North	No
488	4	491	2015-04-30	2003-06-30	3250	m	1972	Works at home	High	1968	Employed	University	y	y	0	1	0		37.000	37	157.0	1.57	23	00	0	6	0	y	own bed	own bed	20	20	0	0	nothing	sweet	nothing	fruit	1	0								South	Yes
489	9	559	2015-04-30	2004-03-26	4060	f	1971	Employed	High	1969	Employed	High	y	y	1	0	0		55.000	55	147.0	1.47	22	30	30	6	0	y	own bed	own bed	20	20	30	30	nothing	nothing	nothing	nothing	1	0								North	No
490	4	491	2015-04-30	2006-05-04	3200	f	1977	Works at home	Middle	1974	Employed	Middle	y	y	2	0	0		32.100	32.1	135.0	1.35	22	30	30	7	0	y	other room	own bed	20	20	0	0	milk	sweet	nothing	nothing		0								South	No
492	4	491	2015-04-30	2004-07-03	3350	f	1983	Works at home	Middle	1976	Employed	High	y	y	0	1	0		37.500	37.5	141.0	1.41	22	30	30	7	0	y	other room	own bed	20	20	0	0	nothing	nothing	nothing	nothing	2	0		y						South	No
493	15	508	2015-04-30	2002-08-26	3300	f	1969	Works at home	High	1972	Employed	Middle	y	y	0	1	0		68.500	68.5	147.5	1.475	23	00	0	7	15	y	own bed	own bed	19	19	30	30	nothing	nothing	nothing	nothing	0	0								South	No
494	9	525	2015-04-23	2011-12-27	3770	m	1981	Employed	High	1979	Employed	High	y	y	1	0	0		15.000	15	100.0	1	23	00	0	7	30	c	other room	own bed	19	19	30	30	nothing	nothing	nothing	nothing	1	1.5								North	Yes
495	9	542	2015-04-29	2010-09-06	2760	f	1980	Employed	High	1977	Employed	High	y	y	0	0	0		16.000	16	103.0	1.03	22	00	0	7	0	y	parents' bed	own bed	20	20	0	0	nothing	nothing	nothing	nothing	1	0								North	No
496	9	542	2015-04-29	2012-01-03	3640	m	1977	Employed	High	1977	Employed	Middle	y	y	1	0	0		14.500	14.5	95.0	0.95	21	30	30	6	30	c	parents' bed	own bed	19	19	0	0	nothing	salted	nothing	nothing	0	1								North	Yes
497	9	542	2015-04-30	2008-10-06	2700	m	1971	Employed	High	1953	Employed	High	y	y	0	0	0		21.000	21	116.0	1.16	21	30	30	7	0	y	parents' bed	own bed	18	18	0	0	juice	nothing	nothing	nothing	0	0								North	Yes
498	9	522	2015-04-24	2011-05-06	3200	f	1972	Employed	High	1968	Employed	High	y	y	0	1	0		14.000	14	98.0	0.98	21	30	30	7	30	y	own bed	own bed	19	19	15	15	nothing	nothing	nothing	nothing	0	0								North	No
499	9	542	2015-04-30	2005-08-30	3250	f	1974	Employed	Middle	1970	Employed	Middle	y	y	1	0	0		44.000	44	145.0	1.45	21	00	0	7	15	c	parents' bed	own bed	19	19	30	30	nothing	nothing	nothing	nothing	0	0								North	No
501	9	522	2015-04-24	2011-12-08	3320	m	1981	Employed	University	1980	Employed	University	y	y	0	1	0		14.000	14	95.0	0.95	22	00	0	7	30	y	parents' bed	own bed	19	19	30	30	milk	nothing	nothing	nothing	1	2								North	Yes
505	20	499	2015-04-23	2011-03-18	2890	m	1974	Unemployed	High	1969	Employed	High	y	y	1	0	0		16.000	16	103.0	1.03	21	30	30	7	30	c	own bed	own bed	19	19	15	15	nothing	nothing	nothing	nothing	1	0.75								North	Yes
507	9	546	2015-04-29	2014-02-01	2000	m	1979	Employed	High	1976	Employed	High	y	y	0	0	0		9.200	9.2	76.0		23	00	0	6	30	y	own bed	own bed	19	19	30	30	juice	nothing	milk	nothing	5	2.5								North	Yes
510	9	542	2015-04-09	2013-11-28	4220	m	1982	Employed	University	1977	Employed	University	y	y	0	0	0		12.500	12.5	75.0		21	30	30	8	0	n	parents' bed	own bed	19	19	30	30	nothing	nothing	nothing	nothing	0	1.5								North	Yes
511	9	542	2015-04-09	2007-01-31	3780	m	1980	Employed	High	1975	Employed	High	y	y	0	1	0		38.000	38	131.0	1.31	23	00	0	8	30	c	own bed	own bed	20	20	30	30	nothing	nothing	nothing	nothing	0	0								North	Yes
512	9	542	2015-04-10	2010-08-13	3020	f	1972	Employed	High	1968	Employed	University	y	y	0	0	0		16.000	16	102.0	1.02	23	00	0	8	0	n	parents' bed	own bed	19	19	30	30	nothing	nothing	nothing	nothing	0	0								North	No
513	9	560	2015-04-30	2013-12-26	1900	m	1973	Employed	High	1958	Employed	Middle	y	y	0	0	0		9.600	9.6	78.0		21	30	30	8	15	y	other room	own bed	19	19	0	0	milk	nothing	nothing	nothing	3	1								North	Yes
514	9	559	2015-04-30	2009-10-31	2940	f	1978	Employed	University	1980	Employed	University	y	y	0	1	0		19.000	19	112.0	1.12	21	30	30	9	30	y	other room	own bed	20	20	0	0	nothing	nothing	nothing	nothing	0	0								North	No
515	9	559	2015-04-30	2013-12-14	3080	m	1978	Unemployed	High	1984	Employed	High	y	y	0	1	0		10.000	10	78.0		0	15	15	8	45	n	parents' bed	own bed	20	20	30	30	juice	nothing	nothing	sweet	1	2								North	Yes
516	9	484	2015-05-06	2014-01-17	3100	f	1985	Employed	Middle	1972	Employed	Middle	y	y	0	0	0		10.100	10.1	79.0		22	45	45	6	30	n	other room	own bed	19	19	15	15	juice	nothing	nothing	nothing	1	1.25								North	No
517	15	504	2015-05-06	2011-07-03	3395	f	1984	Employed	Middle	1976	Employed	High	y	y	0	0	0		14.500	14.5	97.0	0.97	21	00	0	7	0	y	other room	own bed	20	20	0	0	nothing	nothing	nothing	nothing	4	1								South	No
518	9	521	2015-05-06	2009-03-29	3110	m	1986	Employed	High	1983	Employed	High	y	y	0	1	0		23.000	23	118.0	1.18	21	30	30	7	30	y	own bed	own bed	19	19	30	30	nothing	nothing	nothing	nothing	1	0								North	Yes
519	9	522	2015-04-28	2011-04-17	2890	m	1982	Employed	High	1980	Employed	High	y	y	0	1	0		15.000	15	103.5	1.035	22	00	0	7	45	y	own bed	own bed	19	19	15	15	nothing	nothing	nothing	nothing	1	0.25								North	Yes
520	9	521	2015-05-06	2006-12-19	3300	m	1977	Employed	High	1976	Employed	Middle	y	y	0	1	0		26.000	26	128.0	1.28	22	00	0	7	15	c	parents' bed	parents' bed	19	19	30	30	nothing	nothing	nothing	nothing	0	0								North	Yes
521	9	485	2015-04-30	2012-07-19	3010	m	1972	Employed	University	1970	Employed	High	y	y	1	0	0		13.900	13.9	98.0	0.98	21	45	45	8	15	c	parents' bed	own bed	19	19	45	45	juice	nothing	nothing	nothing	2	0.5		y						North	Yes
522	9	485	2015-04-30	2012-07-19	2990	f	1972	Employed	University	1970	Employed	High	y	y	1	0	0		12.200	12.2	95.0	0.95	21	00	0	8	15	c	own bed	own bed	19	19	45	45	juice	nothing	juice	nothing	2	0.75		y						North	No
523	9	484	2015-05-06	2014-01-14	3410	m	1974	Unemployed	High	1971	Employed	High	y	y	0	0	0		10.400	10.4	82.0		22	00	0	8	0	y	own bed	own bed	19	19	45	45	milk	nothing	nothing	nothing	1	2.5								North	Yes
526	9	518	2015-05-06	2001-07-12	3660	m	1970	Employed	High	1969	Employed	High	y	n	0	0	0		55.800	55.8	170.0	1.7	0	15	15	7	30	y	own bed	own bed	20	20	15	15	juice	sweet	nothing	nothing	1	0								North	Yes
527	9	558	2015-05-06	2013-02-18	3990	m	1978	Employed	High	1970	Employed	High	y	y	1	0	4		12.500	12.5	87.0	0.87	21	00	0	7	30	c	own bed	own bed	19	19	0	0	nothing	nothing	nothing	nothing	0	0								North	Yes
528	9	558	2015-05-06	2011-05-03	3870	f	1973	Employed	Middle	1971	Employed	Middle	y	y	1	0	0		17.500	17.5	100.5	1.005	22	30	30	7	0	c	own bed	own bed	20	20	0	0	juice	nothing	nothing	nothing	1	0								North	No
531	13	561	2015-05-06	2013-09-23	3200	f	1982	Employed	High	1983	Employed	High	y	y	0	0	0		9.400	9.4	76.5		22	30	30	7	30	n	parents' bed	parents' bed	20	20	0	0	nothing	nothing	nothing	nothing	0	3.5								South	No
532	15	572	2015-05-06	2013-05-17	3150	f	1986	Employed	High	1982	Employed	Middle	y	y	0	0	0		15.500	15.5	86.5		23	00	0	7	0	n	parents' bed	parents' bed	20	20	30	30	milk	other	nothing	other	2	2								South	No
533	15	572	2015-05-06	2009-11-21	2760	f	1981	Employed	Middle	1974	Employed	High	y	y	0	0	0		22.000	22	113.5	1.135	21	30	30	7	30	y	own bed	own bed	20	20	45	45	nothing		nothing	nothing	3	0								South	No
534	15	572	2015-05-05	2013-09-14	4500	m	1981	Works at home	University	1980	Other	High	y	y	0	0	0		15.000	15	87.0		22	00	0	7	0	y	parents' bed	parents' bed	20	20	0	0	milk	other	milk	other	4	1.5								South	Yes
535	15	572	2015-05-06	2013-12-04	3040	m	1986	Other	High	1989	Other	University	y	y	0	0	0		11.800	11.8	80.0		20	30	30	6	0	y	own bed	own bed	19	19	30	30	nothing	nothing	nothing	nothing	2	1								South	Yes
537	20	574	2015-05-07	2013-09-18	2880	m	1976	Employed	University	1978	Employed	High	y	y	0	0	0		12.000	12	84.0		22	00	0	7	15	y	own bed	own bed	19	19	0	0	nothing	nothing	nothing	nothing	1	1.5								North	Yes
541	15	508	2015-04-30	2011-06-28	2640	m	1980	Works at home	High	1972	Employed	Middle	y	y	0	0	0		16.600	16.6	100.5	1.005	21	30	30	8	0	n	parents' bed	parents' bed	20	20	30	30	nothing	nothing	nothing	nothing	0	1.5								South	Yes
543	15	508	2015-04-30	2011-08-12	3250	f	1976	Works at home	Middle	1965	Employed	Middle	y	y	0	0	0		15.200	15.2	101.5	1.015	0	15	15	7	30	y	own bed	own bed	20	20	30	30	nothing	nothing	nothing	nothing	0	2.5								South	No
544	9	510	2015-05-06	2009-11-08	3560	m	1984	Employed	High	1973	Employed	Middle	y	y	0	1	0		20.000	20	115.0	1.15	21	15	15	7	15	c	parents' bed	own bed	19	19	45	45	milk	nothing	nothing	nothing	0	0								North	Yes
545	15	508	2015-04-30	2010-01-26	2800	f	1979	Employed	High	1980	Employed	High	y	y	0	0	0		19.200	19.2	111.0	1.11	0	30	30	8	0	n	parents' bed	parents' bed	20	20	0	0	nothing	nothing	nothing	nothing	1	0								South	No
546	9	510	2015-05-06	2002-11-11	3460	m	1965	Works at home	University	1962	Employed	High	y	y	1	0	0		43.000	43	161.0	1.61	22	00	0	6	45	c	own bed	own bed	21	21	15	15	nothing	nothing	nothing	nothing	0	0								North	Yes
547	15	508	2015-04-30	2013-06-08	3435	f	1980	Works at home	Middle	1973	Employed	Middle	y	y	0	0	0		12.200	12.2	82.0		23	30	30	8	15	n	own bed	own bed	20	20	15	15	nothing	nothing	nothing	nothing	1	2.5								South	No
548	15	508	2015-04-30	2011-09-26	3050	f	1987	Works at home	Middle	1980	Employed	Middle	y	y	0	0	0		15.000	15	97.0	0.97	21	30	30	7	0	y	own bed	own bed	19	19	30	30	nothing	nothing	nothing	nothing	3	1.5								South	No
549	15	508	2015-04-30	2011-03-04	2840	f	1982	Works at home	High	1980	Employed	Middle	y	y	0	0	0		15.600	15.6	101.5	1.015	22	45	45	8	0	n	own bed	own bed	20	20	30	30	nothing	nothing	nothing	nothing	0	0								South	No
550	15	508	2015-04-30	2011-04-20	2500	m	1972	Employed	High	1970	Employed	High	y	y	1	0	0		17.500	17.5	108.0	1.08	23	30	30	8	0	n	own bed	own bed	21	21	30	30	nothing	nothing	nothing	nothing	0	2								South	Yes
551	15	508	2015-04-30	2011-08-05	3400	f	1973	Works at home	Middle	1972	Employed	High	y	y	1	0	0		14.800	14.8	97.5	0.975	22	30	30	7	45	y	own bed	own bed	19	19	0	0	nothing	nothing	nothing	nothing	1	0.75								South	No
552	15	508	2015-04-30	2010-07-07	3200	m	1981	Works at home	Middle	1978	Employed	Middle	y	y	1	0	0		15.000	15	107.0	1.07	23	00	0	7	0	y	own bed	own bed	20	20	30	30	nothing	nothing	nothing	nothing	1	2								South	Yes
553	15	508	2015-04-30	2007-07-26	2100	f	1981	Works at home	Middle	1978	Employed	Middle	y	y	0	1	0		24.500	24.5	124.0	1.24	22	30	30	7	0	y	own bed	own bed	20	20	15	15	nothing	nothing	nothing	nothing	1	0.5								South	No
554	9	507	2015-05-07	2009-07-17	3030	m	1974	Employed	University	1975	Employed	High	y	y	0	1	0		19.500	19.5	115.5	1.155	21	45	45	7	30	y	own bed	own bed	19	19	30	30	nothing	nothing	nothing	nothing	0	0								North	Yes
555	9	507	2015-05-07	2012-12-28	3110	f	1974	Employed	University	1975	Employed	High	y	y	1	0	0		11.500	11.5	86.0	0.86	21	45	45	6	0	c	own bed	own bed	19	19	30	30	nothing	nothing	nothing	nothing	0	3								North	No
556	9	514	2015-05-07	2013-03-04	3250	f	1976	Employed	High	1976	Employed	University	y	y	1	0	0		12.000	12	79.0	0.79	23	15	15	8	0	n	parents' bed	parents' bed	20	20	0	0	milk	fruit	nothing	nothing	0	2								North	No
557	20	574	2015-05-07	2003-02-22	3370	m	1972	Works at home	High	1972	Employed	Middle	y	y	0	1	0		40.000	40	155.0	1.55	22	15	15	7	15	c	own bed	own bed	20	20	15	15	nothing	nothing	nothing	nothing	0	0								North	Yes
559	20	489	2015-05-07	2009-08-21	3950	m	1978	Employed	High	1978	Employed	High	y	y	0	1	0		19.500	19.5	111.2	1.112	21	30	30	7	15	y	own bed	own bed	19	19	45	45	nothing	nothing	nothing	nothing	0	0								North	Yes
560	9	559	2015-04-30	2011-07-06	3300	f	1988	Works at home	Middle	1982	Employed	Middle	y	y	0	1	0		19.000	19	105.0	1.05	22	30	30	8	30	n	own bed	own bed	20	20	30	30	nothing	nothing	nothing	nothing	1	1.5								North	No
561	20	489	2015-05-07	2013-05-04	2890	f	1984	Employed	Middle	1984	Employed	Middle	y	y	0	0	0		15.000	15	93.5	0.935	22	00	0	7	15	y	own bed	other room	20	20	0	0	milk	nothing	nothing	nothing	3	0.5								North	No
563	20	499	2015-04-30	2002-08-12	4980	m	1974	Employed	High	1972	Employed	High	y	y	0	1	0		59.200	59.2	170.0	1.7	23	00	0	7	0	y	own bed	own bed	19	19	30	30	nothing	nothing	nothing	nothing	0	0								North	Yes
564	20	574	2015-05-07	2003-12-29	3850	m	1967	Employed	University	1965	Employed	University	y	y	2	0	0		33.000	33	141.0	1.41	21	30	30	7	0	c	parents' bed	own bed	19	19	30	30	nothing	nothing	nothing	nothing	0	0								North	Yes
565	9	558	2015-05-07	2009-01-24	3560	f	1969	Employed	University	1968	Employed	High	y	y	0	1	4		21.800	21.8	116.0	1.16	21	00	0	7	30	y	own bed	own bed	19	19	30	30	nothing	nothing	nothing	nothing	0	0								North	No
566	9	558	2015-05-07	2002-09-19	3610	f	1964	Employed	High	1964	Employed	High	y	y	2	0	2		53.500	53.5	155.0	1.55	22	30	30	7	0	y	own bed	own bed	20	20	0	0	milk	nothing	nothing	nothing	0	0								North	No
567	20	571	2015-05-07	2010-06-04	3250	f	1972	Employed	University	1963	Employed	University	y	y	0	1	0		21.800	21.8	107.0	1.07	21	30	30	7	30	y	own bed	own bed	19	19	0	0	milk	nothing	nothing	nothing	1	0								North	No
568	9	484	2015-05-07	2001-06-01	3560	m	1969	Works at home	High	1971	Employed	Middle	y	y	0	0	0		57.700	57.7	166.2	1.662	21	45	45	6	0	c	own bed	own bed	20	20	30	30	nothing	nothing	nothing	nothing	0	0								North	Yes
569	20	499	2015-05-07	2007-03-23	3390	m	1973	Unemployed	High	1968	Employed	Middle	y	y	1	0	0		30.500	30.5	131.5	1.315	21	30	30	6	30	c	other room	own bed	19	19	30	30	nothing	nothing	nothing	nothing	3	0	y							North	Yes
570	20	499	2015-05-07	2004-02-23	3530	f	1970	Works at home	High	1964	Employed	High	y	y	0	1	0		37.400	37.4	142.0	1.42	21	15	15	7	0	c	own bed	own bed	19	19	30	30	nothing	nothing	nothing	nothing	0	0								North	No
571	17	534	2015-05-07	2011-04-29	2700	f	1978	Employed	High	1964	Employed	University	y	y	1	0	0		15.200	15.2	103.0	1.03	21	00	0	8	0	y	own bed	own bed	19	19	15	15	milk	nothing	nothing	nothing	1	0								North	No
572	9	503	2015-05-07	2001-05-19	3800	m	1972	Works at home	High	1970	Employed	Middle	y	y	0	1	0		40.000	40	160.0	1.6	22	30	30	6	45	c	own bed	own bed	21	21	45	45	nothing	nothing	nothing	nothing	0	0								North	Yes
573	9	503	2015-05-07	2003-05-14	3700	m	1972	Works at home	High	1970	Employed	Middle	y	y	1	0	0		43.000	43	152.0	1.52	22	30	30	6	45	c	own bed	own bed	19	19	30	30	nothing	nothing	nothing	nothing	0	0								North	Yes
574	9	560	2015-05-07	2013-11-22	2800	f	1971	Employed	Middle	1968	Employed	High	y	y	0	0	0		11.400	11.4	82.5		21	30	30	6	15	y	other room	own bed	19	19	0	0	nothing	nothing	nothing	nothing	1	2								North	No
575	20	499	2015-04-30	2012-12-26	3320	m	1976	Employed	High	1973	Employed	Middle	y	y	1	0	1		13.700	13.7	90.0	0.9	20	30	30	6	30	c	other room	own bed	19	19	0	0	nothing	nothing	nothing	nothing	1	1								North	Yes
576	17	534	2015-05-07	2013-06-22	3060	m	1984	Employed	High	1979	Employed	High	y	y	2	1	0		12.900	12.9	87.0		20	00	0	7	0	y	own bed	own bed	19	19	0	0	milk	nothing	nothing	nothing	0	2								North	Yes
577	9	525	2015-05-07	2013-04-20	3130	f	1976	Employed	University	1975	Employed	High	y	y	1	0	0		12.000	12	86.5	0.865	22	00	0	7	0	c	own bed	own bed	19	19	30	30	nothing	nothing	nothing	nothing	1	3								North	No
578	9	525	2015-05-07	2007-10-31	2950	m	1976	Employed	High	1969	Employed	Middle	y	y	0	0	0		21.500	21.5	123.0	1.23	22	15	15	7	0	y	own bed	own bed	19	19	0	0		nothing	nothing	nothing	0	0.5								North	Yes
580	9	511	2015-05-07	2001-06-24	3370	m	1965	Employed	High	1967	Employed	High	y	y	0	1	0		59.500	59.5	177.0	1.77	22	00	0	6	45	c	own bed	own bed	18	18	45	45	milk	other	nothing	nothing	0	0								North	Yes
581	17	534	2015-05-07	2006-12-28	3960	f	1988	Employed	High				y	n	0	0	1	n	27.000	27	128.0	1.28	21	00	0	7	0	n	parents' bed	parents' bed	19	19	0	0	nothing	nothing	nothing	nothing	0	0								North	No
582	9	525	2015-05-06	2014-05-04	3170	f	1978	Employed	High	1976	Employed	High	y	y	0	0	0		9.300	9.3	78.0		23	45	45	8	0	n	other room	own bed	19	19	30	30	nothing	nothing	nothing	nothing	1	1								North	No
584	20	499	2015-04-30	2005-01-14	3200	f	1970	Employed	University	1965	Employed	Middle	y	y	0	1	0		32.300	32.3	134.0	1.34	21	30	30	7	0	c	own bed	own bed	19	19	30	30	nothing	nothing	nothing	fruit	0	0								North	No
586	9	560	2015-05-07	2013-11-15	2930	f	1973	Works at home	High	1970	Employed	High	y	y	0	0	0		11.200	11.2	87.0		21	30	30	8	30	y	parents' bed	parents' bed	19	19	30	30	nothing	nothing	nothing	nothing	1	2								North	No
587	17	534	2015-05-06	2010-10-20	3230	f	1973	Employed	High	1970	Employed	High	y	y	1	0	0		20.000	20	113.0	1.13	21	00	0	6	45	y	parents' bed	parents' bed	19	19	0	0	nothing	nothing	nothing	nothing	2	0								North	No
588	15	508	2015-05-07	2005-12-30	3600	m	1975	Employed	High	1974	Employed	High	y	y	0	1	0		29.500	29.5	134.0	1.34	23	00	0	7	0	y	own bed	own bed	21	21	0	0	nothing	nothing	nothing	nothing	1	0								South	Yes
589	20	571	2015-05-07	2011-09-26	3380	m	1988	Works at home	University	1976	Employed	High	y	y	0	1	0		14.500	14.5	97.0	0.97	22	15	15	7	45	c	own bed	own bed	20	20	30	30	nothing	fruit	nothing	nothing	0	1								North	Yes
590	15	508	2015-05-07	2010-07-29	2950	f	1975	Employed	High	1974	Employed	High	y	y	0	1	0		14.700	14.7	103.0	1.03	23	00	0	7	0	y	own bed	own bed	21	21	0	0	nothing	nothing	nothing	nothing	0	2								South	No
591	15	508	2015-05-07	2011-05-18	2120	f	1984	Employed	High	1982	Employed	High	y	y	0	1	0		14.800	14.8	100.0	1	21	30	30	8	0	c	own bed	own bed	20	20	0	0	nothing	nothing	nothing	nothing	2	0								South	No
592	15	508	2015-05-07	2011-05-18	2220	m	1984	Employed	High	1982	Employed	High	y	y	1	0	0		16.300	16.3	105.0	1.05	21	30	30	8	0	c	own bed	own bed	20	20	0	0	nothing	nothing	nothing	nothing	1	0								South	Yes
593	9	513	2015-05-07	2013-09-14	3000	f	1978	Employed	High	1974	Employed	High	y	y	0	0	0		9.000	9	78.5		22	30	30	8	0	y	other room	own bed	19	19	0	0	milk	nothing	milk	nothing	4	2								North	No
594	9	513	2015-05-07	2004-02-23	3060	f	1972	Employed	High	1966	Employed	University	y	y	2	0	0		38.600	38.6	155.0	1.55	22	00	0	7	30	c	own bed	own bed	19	19	30	30	nothing	nothing	nothing	nothing	0	0								North	No
595	15	572	2015-05-08	2013-05-21	4000	m	1985	Unemployed	High	1970	Employed	High	y	y	0	1	0		17.000	17	93.0		23	00	0	9	30	y	own bed	own bed	21	21	0	0	milk	nothing	nothing	nothing	1	2								South	Yes
597	17	534	2015-05-08	2013-10-13	2900	m	1983	Employed	University	1972	Employed	High	y	y	0	0	0		9.000	9	81.0		22	30	30	8	0	y	parents' bed	parents' bed	20	20	0	0	nothing	nothing	nothing	nothing	0	2								North	Yes
598	4	523	2015-05-08	2011-08-19	3140	f	1986	Works at home	High	1983	Employed	High	y	y	0	1	0		18.000	18	105.0	1.05	22	30	30	8	30	y	parents' bed	own bed	19	19	15	15	nothing	nothing	nothing	nothing	0	0								South	No
599	10	505	2015-05-08	2009-04-21	2700	f	1973	Works at home	High	1980	Employed	High	y	y	0	0	0		18.700	18.7	107.3	1.073	22	30	30	8	30	y	other room	own bed	19	19	45	45	nothing	fruit	nothing	nothing	0	0								Center	No
600	17	534	2015-05-08	2012-03-01	3350	f	1979	Unemployed	High	1976	Employed	High	y	y	2	0	0		16.000	16	98.0	0.98	20	00	0	6	30	y	own bed	own bed	19	19	0	0	nothing	nothing	nothing	nothing	2	0								North	No
601	9	511	2015-05-08	2012-09-05	3010	m	1978	Employed	University	1978	Employed	High	y	y	2	0	0		13.000	13	92.5	0.925	20	45	45	6	45	c	own bed	own bed	19	19	30	30	nothing	nothing	nothing	nothing	2	2								North	Yes
602	9	560	2015-05-08	2013-11-21	3050	f	1987	Employed	High	1986	Employed	Middle	y	y	0	0	0		11.700	11.7	82.0		21	00	0	8	0	y	other room	own bed	19	19	45	45	juice	nothing	nothing	nothing	0	1								North	No
604	20	489	2015-05-08	2013-05-04	3560	m	1971	Employed	High	1970	Employed	High	y	y	2	0	0		12.500	12.5	85.0	0.85	21	30	30	7	0	y	own bed	own bed	20	20	0	0	milk	nothing	nothing	nothing	0	2								North	Yes
605	20	489	2015-05-08	2014-04-22	3470	m	1985	Employed	High	1977	Employed	Middle	y	y	1	0	0		8.600	8.6	71.0		22	00	0	6	30	y	own bed	own bed	19	19	45	45	milk	nothing	milk	nothing	3	0.5								North	Yes
607	20	565	2015-05-08	2007-03-06	3430	m	1969	Works at home	Middle	1964	Employed	Middle	y	y	2	0	0		30.000	30	137.0	1.37	21	45	45	7	15	y	parents' bed	own bed	20	20	30	30	nothing	nothing	nothing	nothing	0	0								North	Yes
608	9	542	2015-05-08	2013-08-03	2800	m	1974	Employed	University	1972	Employed	High	y	y	0	0	0		12.400	12.4	83.0		22	30	30	7	0	y	own bed	own bed	19	19	45	45	nothing	nothing	nothing	nothing	1	3								North	Yes
609	20	565	2015-05-08	2003-11-12	3180	f	1975	Employed	High	1971	Other	Middle	y	n	1	0	1		40.000	40	147.0	1.47	22	30	30	6	0	y	own bed	own bed	20	20	0	0	nothing	nothing	nothing	nothing	1	0								North	No
610	20	487	2015-05-08	2012-06-06	2990	m	1984	Employed	Elementary	1975	Employed	Middle	y	y	0	0	0		15.000	15	98.0	0.98	21	30	30	7	15	y	own bed	own bed	20	20	0	0	nothing	nothing	nothing	nothing	1	1.5								North	Yes
611	9	518	2015-05-08	2004-02-05	3170	f	1964	Employed	University	1965	Employed	High	y	y	1	0	0		49.800	49.8	159.0	1.59	22	15	15	7	45	c	own bed	own bed	21	21	15	15	nothing	nothing	nothing	nothing	0	0								North	No
612	20	487	2015-05-07	2011-10-07	2450	f	1976	Employed	Middle	1977	Employed	High	y	y	0	0	0		10.000	10	87.0	0.87	22	45	45	4	15	y	own bed	parents' bed	19	19	45	45	juice	nothing	juice	nothing	2	1.25								North	No
613	20	487	2015-05-08	2009-11-12	2000	m	1975	Works at home	High	1966	Employed	University	y	y	2	1	0		14.000	14	112.0	1.12	21	15	15	7	0	c	own bed	own bed	19	19	0	0	nothing	nothing	nothing	nothing	1	0								North	Yes
614	20	487	2015-05-05	2012-06-05	3120	m	1980	Employed	Middle	1968	Employed	Middle	y	y	0	0	0		14.900	14.9	104.0	1.04	21	15	15	6	30	y	own bed	own bed	19	19	15	15	nothing	nothing	nothing	nothing	2	1								North	Yes
615	9	518	2015-05-08	2006-11-10	3150	m	1972	Employed	High	1972	Employed	Middle	y	y	1	0	0		28.700	28.7	132.0	1.32	22	30	30	7	0	c	own bed	own bed	20	20	0	0	nothing	sweet	nothing	nothing	0	0								North	Yes
616	9	542	2015-05-08	2008-10-24	3460	f	1972	Works at home	Middle	1970	Employed	Middle	y	y	1	0	0		19.000	19	115.0	1.15	21	30	30	7	30	c	own bed	own bed	19	19	0	0	nothing	nothing	juice	nothing	0	0								North	No
617	9	510	2015-05-08	2005-11-21	2970	f	1970	Employed	University	1965	Employed	University	y	y	0	1	0		30.000	30	138.0	1.38	23	00	0	7	30	y	parents' bed	parents' bed	20	20	0	0	nothing	salted & sweet	nothing	nothing	0	0								North	No
618	10	505	2015-05-08	2009-05-10	3590	f	1977	Employed	High	1978	Employed	High	y	y	0	1	0		19.600	19.6	118.6	1.186	23	00	0	8	30	c	parents' bed	own bed	20	20	0	0	milk	nothing	nothing	nothing	0	0								Center	No
619	9	559	2015-04-30	2013-12-03	3140	m	1976	Employed	University	1978	Employed	Middle	y	y	0	0	0		11.000	11	87.0		23	00	0	7	30	n	parents' bed	parents' bed	20	20	30	30	nothing	nothing	juice	nothing	2	2								North	Yes
620	9	484	2015-05-08	2006-02-11	2870	m	1964	Works at home	High	1964	Employed	High	y	y	0	0	0		29.200	29.2	132.0	1.32	21	30	30	7	30	y	other room	own bed	20	20	15	15	nothing	sweet	nothing	nothing	0	0								North	Yes
621	9	485	2015-04-29	2007-01-10	3100	f	1971	Employed	University	1966	Employed	University	y	y	1	0	0		26.000	26	138.0	1.38	21	30	30	7	30	y	own bed	own bed	20	20	0	0	nothing	nothing	nothing	nothing	1	0								North	No
622	9	558	2015-05-08	2010-01-22	3900	m	1969	Employed	High	1966	Employed	University	y	y	1	0	4		22.100	22.1	118.5	1.185	22	30	30	7	30	y	own bed	own bed	20	20	0	0	juice	nothing	nothing	nothing	1	0								North	Yes
623	15	541	2015-05-26	2013-11-15	3850	m	1976	Works at home	University	1976	Employed	Middle	y	y	0	0	0		9.700	9.7	76.0		22	00	0	8	0	y	own bed	own bed	21	21	0	0	milk	nothing	nothing	nothing	1	1								South	Yes
624	15	541	2015-05-08	2006-09-21	3610	f	1974	Works at home	Middle	1972	Employed	High	y	y	1	0	0		26.000	26	130.0	1.3	22	30	30	7	0	y	own bed	own bed	20	20	0	0	nothing	other	nothing	nothing	0	0								South	No
625	15	541	2015-05-08	2012-07-24	3800	m	1984	Works at home	University	1980	Employed	Middle	y	y	0	0	0		16.500	16.5	94.5	0.945	0	00	0	7	30	y	parents' bed	parents' bed	19	19	30	30	nothing	sweet	milk	nothing	3	2								South	Yes
626	15	497	2015-05-07	2014-05-04	3300	m	1974	Employed	University	1973	Employed	High	y	y	2	0	0		9.200	9.2	76.5		23	00	0	8	0	y	parents' bed	own bed	20	20	0	0	milk	nothing	nothing	nothing	2	0.5								South	Yes
627	15	497	2015-05-07	2013-11-03	3630	f	1985	Works at home	High	1981	Employed	High	y	y	0	0	0		10.400	10.4	81.5		22	30	30	9	45	n	own bed	parents' bed	21	21	45	45	nothing	nothing	nothing	nothing	1	3								South	No
628	15	497	2015-05-06	2011-09-24	3200	m	1981	Employed	University	1979	Employed	High	y	y	0	1	1		14.000	14	97.0	0.97	23	00	0	7	0	n	parents' bed	parents' bed	20	20	0	0	milk	nothing	nothing	nothing	2	2								South	Yes
629	15	497	2015-05-06	2004-09-20	2750	f	1967	Works at home	Middle	1969	Unemployed	High	y	y	0	0	0		54.600	54.6	137.0	1.37	22	00	0	7	45	y	own bed	own bed	20	20	15	15	nothing	nothing	nothing	nothing	2	0								South	No
631	9	522	2015-05-08	2013-04-05	3200	m	1983	Employed	Middle	1980	Employed	High	y	y	1	0	0		15.000	15	90.0	0.9	21	30	30	8	15	y	other room	parents' bed	19	19	30	30	nothing	nothing	nothing	nothing	0	1								North	Yes
634	16	548	2015-05-06	2007-12-09	3240	m	1968	Employed	High	1967	Employed	Middle	y	y	1	0	0		28.000	28	128.0	1.28	23	15	15	7	15	c	own bed	own bed	20	20	30	30	nothing	nothing	nothing	nothing	1	0	y							Center	Yes
635	16	548	2015-05-06	2002-03-20	3850	m	1968	Employed	High	1967	Employed	Middle	y	y	0	1	0		32.000	32	144.0	1.44	23	15	15	6	30	c	own bed	own bed	20	20	30	30	nothing	nothing	nothing	nothing	1	0	y							Center	Yes
636	20	565	2015-05-12	2013-07-11	3730	m	1978	Employed	High	1981	Employed	Middle	y	y	1	0	0		12.600	12.6	82.0		22	15	15	8	0	n	own bed	own bed	19	19	30	30	milk	nothing	nothing	nothing	0	2								North	Yes
637	17	534	2015-05-12	2013-05-14	4010	f	1982	Employed	High	1979	Employed	High	y	y	1	0	0		11.500	11.5	87.0		21	00	0	8	0	y	own bed	own bed	19	19	0	0	milk	nothing	nothing	nothing	2	2								North	No
638	4	491	2015-05-12	2009-10-09	3800	f	1979	Unemployed	Middle	1970	Employed	High	y	y	1	0	0		27.000	27	116.0	1.16	21	30	30	7	45	n	parents' bed	parents' bed	19	19	30	30	milk	nothing	milk	nothing	3	0								South	No
639	9	511	2015-05-12	2012-12-05	3430	m	1985	Employed	Middle	1980	Unemployed	Middle	y	y	0	0	0		13.400	13.4	88.5	0.885	21	30	30	7	0	y	own bed	own bed	19	19	30	30	nothing	nothing	nothing	nothing	0	2								North	Yes
640	9	503	2015-05-12	2010-02-04	3180	m	1974	Employed	University	1970	Employed	University	y	y	1	0	0		19.000	19	111.0	1.11	21	00	0	7	0	c	own bed	own bed	20	20	0	0	nothing	nothing	nothing	nothing	1	0								North	Yes
641	9	503	2015-05-12	2009-04-17	3200	f	1975	Employed	University	1968	Employed	Middle	y	y	0	1	0		19.000	19	111.0	1.11	21	15	15	7	15	c	other room	parents' bed	20	20	0	0	milk	nothing	nothing	nothing	3	0								North	No
642	9	503	2015-05-12	2011-03-11	2820	f	1975	Employed	University	1968	Employed	Middle	y	y	1	0	0		14.000	14	98.0	0.98	21	00	0	7	15	c	other room	own bed	20	20	0	0	juice	nothing	nothing	nothing	0	0								North	No
643	9	522	2015-05-12	2012-04-19	3150	m	1977	Employed	High	1975	Employed	High	y	y	0	0	0		11.000	11	92.0	0.92	22	30	30	8	0	y	own bed	own bed	21	21	0	0	nothing	nothing	nothing	nothing	3	2								North	Yes
644	15	508	2015-05-12	2011-07-28	2500	f	1978	Employed	High	1977	Employed	High	y	y	0	0	0		17.000	17	97.0	0.97	23	30	30	8	15	n	own bed	own bed	20	20	0	0	nothing	nothing	nothing	nothing	0	2.5								South	No
645	15	508	2015-05-12	2009-10-03	3400	m	1980	Works at home	Middle	1979	Employed	Middle	y	y	1	0	0		19.000	19	115.0	1.15	23	00	0	7	45	c	own bed	own bed	21	21	30	30	nothing	nothing	nothing	nothing	0	3.5								South	Yes
646	15	508	2015-05-12	2013-04-01	4070	m	1978	Works at home	Middle	1976	Employed	Middle	y	y	2	0	0		13.700	13.7	86.0	0.86	23	30	30	8	30	n	parents' bed	parents' bed	20	20	30	30	milk	nothing	nothing	nothing	0	2								South	Yes
647	9	484	2015-05-12	2012-04-20	3060	f	1980	Employed	University	1971	Employed	University	y	y	0	1	0		14.700	14.7	95.0	0.95	23	00	0	8	0	c	other room	parents' bed	21	21	0	0	nothing	nothing	nothing	nothing	2	2.5								North	No
648	9	484	2015-05-12	2012-04-20	3410	m	1980	Employed	University	1971	Employed	University	y	y	1	0	0		14.600	14.6	95.0	0.95	23	00	0	7	45	c	other room	parents' bed	21	21	0	0	nothing	nothing	milk	nothing	0	1								North	Yes
649	9	559	2015-05-12	2009-07-24	3000	f	1981	Employed	Middle	1982	Employed	Middle	n	y	0	0	3		21.000	21	106.5	1.065	21	30	30	8	30	y	parents' bed	parents' bed	20	20	0	0	nothing	nothing	nothing	nothing	0	0								North	No
650	15	508	2015-05-12	2008-06-09	2930	f	1980	Works at home	Middle	1975	Employed	High	y	y	1	0	0		20.800	20.8	119.0	1.19	22	30	30	7	30	c	own bed	own bed	20	20	30	30	nothing	nothing	nothing	nothing	0	0								South	No
651	9	521	2015-05-12	2010-09-24	2550	f	1981	Employed	University	1976	Employed	Middle	y	y	0	1	0		18.000	18	103.0	1.03	21	15	15	7	30	c	own bed	own bed	19	19	0	0	nothing	nothing	nothing	nothing	1	0								North	No
652	15	508	2015-05-12	2012-09-24	3100	m	1979	Works at home	High	1978	Employed	Middle	y	y	1	0	0		13.300	13.3	89.5	0.895	23	00	0	6	15	c	own bed	own bed	20	20	15	15	nothing	nothing	nothing	nothing	0	2								South	Yes
654	9	521	2015-05-12	2013-06-21	3220	f	1980	Employed	High	1974	Employed	High	y	y	1	0	0		12.000	12	84.0		21	00	0	7	0	n	own bed	own bed	19	19	0	0	nothing	nothing	milk	nothing	3	3								North	No
655	9	560	2015-05-12	2011-09-18	3900	m	1990	Works at home	Middle	1980	Employed	High	y	y	0	2	0		14.600	14.6	98.6	0.986	22	30	30	7	0	na	own bed	own bed	20	20	30	30	nothing	nothing	nothing	nothing	3	0								North	Yes
657	9	521	2015-05-12	2008-01-18	3200	f	1973	Employed	Middle	1968	Employed	Middle	y	y	1	0	0		31.000	31	127.0	1.27	21	15	15	7	15	c	own bed	own bed	19	19	0	0	nothing	nothing	nothing	nothing	1	0								North	No
658	10	505	2015-05-12	2013-11-11	3780	f	1980	Employed	High	1974	Employed	High	y	y	1	0	0		11.000	11	86.0		21	30	30	7	30	n	other room	parents' bed	20	20	0	0	milk	sweet	nothing	nothing	2	2					y			Center	No
659	20	571	2015-05-12	2001-05-29	3600	f	1976	Employed	University	1972	Employed	University	y	y	0	2	0		47.200	47.2	166.0	1.66	22	30	30	6	15	y	own bed	own bed	20	20	45	45	milk	nothing	nothing	nothing	2	0								North	No
660	20	575	2015-05-12	2006-03-07	3010	f	1973	Employed	High	1972	Employed	High	y	y	0	0	0		39.000	39	146.0	1.46	22	15	15	6	45	y	parents' bed	parents' bed	20	20	15	15	nothing	nothing	nothing	nothing	0	0								North	No
662	9	507	2015-05-12	2014-01-15	2410	m	1983	Employed	High	1981	Employed	University	y	y	0	0	0		10.000	10	80.0		20	45	45	7	0	y	own bed	own bed	19	19	0	0	juice	nothing	nothing	nothing	0	3								North	Yes
663	9	513	2015-05-12	2008-02-24	3220	f	1980	Employed	High	1976	Employed	University	y	y	1	0	0		21.000	21	121.0	1.21	21	15	15	7	15	c	other room	own bed	20	20	0	0	nothing	nothing	nothing	nothing	0	0								North	No
664	10	505	2015-05-12	2009-05-07	2900	f	1980	Employed	High	1979	Employed	Middle	y	y	0	0	0		31.600	31.6	121.6	1.216	23	00	0	8	0	y	own bed	own bed	20	20	0	0	nothing	nothing	nothing	nothing	0	0.5								Center	No
665	20	571	2015-05-12	2005-02-18	2800	m	1971	Employed	University	1970	Employed	University	y	y	1	0	0		38.300	38.3	136.0	1.36	22	30	30	7	15	c	own bed	own bed	19	19	15	15	nothing	nothing	nothing	nothing	0	0								North	Yes
666	9	513	2015-05-12	2004-06-14	2600	m	1965	Employed	High	1966	Employed	High	y	y	1	0	0		33.000	33	141.0	1.41	23	00	0	7	45	c	own bed	own bed	20	20	15	15	nothing	nothing	nothing	nothing	0	0								North	Yes
667	9	517	2015-05-12	2006-04-13	2755	m	1977	Employed	High	1975	Employed	High	y	y	0	0	0		30.000	30	132.0	1.32	20	45	45	6	30	y	own bed	own bed					nothing	nothing	nothing	nothing	3	0								North	Yes
668	9	513	2015-05-12	2011-04-15	4020	f	1975	Works at home	High	1973	Employed	High	y	y	1	0	0		14.100	14.1	100.0	1	21	30	30	7	30	c	own bed	parents' bed	20	20	0	0	nothing	nothing	nothing	nothing	1	1								North	No
670	9	554	2015-05-13	2014-05-07	3650	m	1980	Employed	University	1978	Employed	University	y	y	0	0	0		10.900	10.9	76.6		22	00	0	7	0	y	own bed		19	19	15	15	nothing	nothing	nothing	nothing	1	2.5								North	Yes
671	15	508	2015-05-13	2012-09-21	3650	m	1978	Employed	University	1976	Employed	University	y	y	0	0	0		19.000	19	99.5	0.995	22	30	30	6	15	y	own bed	own bed	19	19	15	15	milk & juice	nothing	nothing	nothing	0	2								South	Yes
672	4	564	2015-04-30	2007-09-18	2965	f	1980	Unemployed	High	1971	Other	Middle	y	y	0	1	2		48.500	48.5	129.0	1.29	21	30	30	7	30	y	own bed	own bed	20	20	15	15	nothing	nothing	nothing	nothing	0	0								South	No
673	15	508	2015-05-13	2009-01-05	3320	f	1982	Works at home	High	1979	Employed	High	y	y	0	1	0		21.800	21.8	117.5	1.175	21	00	0	7	0	y	own bed	own bed	20	20	15	15	nothing	nothing	nothing	nothing	1	0								South	No
674	4	564	2015-04-30	2005-05-11	3100	m	1977	Employed	High	1975	Employed	High	y	y	0	1	0		40.300	40.3	139.0	1.39	22	00	0	8	30	c	parents' bed	parents' bed	19	19	30	30	nothing	nothing	nothing	nothing	0	0								South	Yes
675	9	553	2015-05-13	2012-04-21	1978	m	1979	Unemployed	High	1974	Other	High	y	y	0	0	0		12.800	12.8	96.3	0.963	22	00	0	7	30	y	own bed	own bed	19	19	30	30	juice	nothing	juice	nothing	1	1.5								North	Yes
676	4	564	2015-04-30	2005-03-01	2520	f	1978	Works at home	High	1977	Employed	High	y	y	0	2	0		30.000	30	140.0	1.4	22	30	30	9	0	c	own bed	own bed	20	20	30	30	nothing	nothing	nothing	nothing	0	0								South	No
677	4	564	2015-04-30	2007-06-22	2690	f	1978	Works at home	High	1977	Employed	High	y	y	1	1	0		20.300	20.3	120.0	1.2	22	30	30	9	0	c	own bed	own bed	20	20	30	30	nothing	nothing	nothing	nothing	0	0								South	No
678	10	505	2015-05-13	2013-05-16	3700	m	1977	Employed	High	1977	Employed	High	y	y	1	0	0		12.900	12.9	92.0		22	00	0	8	0	y	own bed	own bed	20	20	0	0	milk	nothing	nothing	nothing	0	2								Center	Yes
679	9	553	2015-05-13	2014-01-07	2750	m	1980	Employed	University	1971	Employed	High	y	y	1	0	0		9.000	9	77.3		21	15	15	6	15	c	own bed	own bed	19	19	15	15	nothing	nothing	nothing	nothing	3	2								North	Yes
680	9	507	2015-05-13	2009-09-15	3200	f	1974	Employed	High	1970	Employed	Middle	y	y	0	0	0		17.000	17	112.0	1.12	22	00	0	8	30	y	parents' bed	parents' bed	19	19	0	0	nothing	salted	nothing	nothing	0	0								North	No
681	9	542	2015-05-13	2006-10-02	2640	f	1966	Employed	Middle	1965	Employed	Middle	y	y	0	0	0		31.500	31.5	132.0	1.32	21	30	30	7	30	n	own bed	parents' bed	19	19	30	30	milk	nothing	nothing	nothing	1	0								North	No
682	9	507	2015-05-13	2014-01-21	2950	m	1974	Employed	University	1968	Employed	University	y	y	0	0	0		10.000	10	79.0		21	30	30	7	30	y	parents' bed	parents' bed	19	19	15	15	nothing	nothing	nothing	nothing	0	3.5								North	Yes
683	17	534	2015-05-13	2006-04-11	3820	m	1982	Employed	High	1969	Employed	University	y	y	0	1	0		29.000	29	132.0	1.32	21	30	30	7	0	y	own bed	own bed	19	19	15	15	nothing	nothing	nothing	nothing	2	0								North	Yes
684	17	534	2015-05-13	2001-07-26	3500	m	1963	Unemployed	High	1961	Employed	Middle	y	n	2	0	0		53.000	53	170.0	1.7	21	00	0	7	45	y	own bed	own bed	19	19	0	0	milk	fruit & sweet	nothing	nothing	0	0								North	Yes
685	15	497	2015-05-08	2011-09-21	3000	m	1979	Employed	Middle	1980	Employed	High	y	y	0	0	0		14.000	14	100.0	1	23	30	30	7	30	y	parents' bed	parents' bed	20	20	0	0	nothing	nothing	nothing	nothing	3	2.75								South	Yes
687	15	497	2015-05-12	2009-06-26	3420	f	1985	Works at home	Middle	1983	Employed	Middle	y	y	0	0	0		29.000	29	116.0	1.16	22	30	30	8	30	n	own bed	own bed	20	20	30	30	nothing	nothing	nothing	nothing	1	1.5								South	No
688	15	497	2015-05-12	2001-09-26	3300	f	1980	Works at home	High	1980	Employed	Middle	y	y	0	2	0		45.000	45	175.0	1.75	24	00	0	6	45	c	own bed	own bed	20	20	0	0	nothing	nothing	nothing	nothing	0	0								South	No
689	9	517	2015-05-13	2008-04-05	3900	m	1976	Employed	University	1975	Employed	High	y	y	0	2	0		36.000	36	140.0	1.4	21	00	0	6	30	c	own bed	own bed	19	19	0	0	nothing	nothing	nothing	nothing	0	0								North	Yes
690	15	497	2015-05-12	2011-03-23	3480	f	1980	Employed	High	1980	Unemployed	Elementary	y	y	0	0	0		18.000	18	100.0	1	23	00	0	8	0	n	own bed	own bed	21	21	0	0	juice	nothing	nothing	nothing	1	0.5								South	No
691	9	517	2015-05-13	2013-01-21	2900	f	1976	Employed	High	1970	Employed	Middle	y	y	1	0	0		13.000	13	93.0	0.93	21	15	15	6	0	n	own bed	own bed	19	19	0	0	milk	sweet	nothing	nothing	2	1	y						y	North	No
692	15	508	2015-05-13	2009-02-06	3000	f	1976	Employed	High	1973	Employed	High	y	y	1	0	0		18.000	18	113.0	1.13	22	30	30	7	30	c	own bed	own bed	20	20	15	15	nothing	nothing	nothing	nothing	0	0								South	No
693	9	511	2015-05-13	2004-02-16	3390	m	1972	Employed	Middle	1968	Employed	Middle	y	y	0	1	0		39.500	39.5	143.0	1.43	22	00	0	7	0	c	own bed	own bed	20	20	30	30	nothing	nothing	nothing	nothing	0	0								North	Yes
695	9	525	2015-05-13	2014-01-27	3490	m	1981	Employed	High	1979	Employed	Middle	y	y	1	0	0		12.100	12.1	81.0		22	30	30	8	0	c	own bed	own bed	19	19	30	30	milk	nothing	nothing	nothing	0	2								North	Yes
697	9	560	2015-05-13	2013-09-20	2470	m	1976	Other	Middle	1965	Employed	Middle	y	y	0	0	0		10.500	10.5	85.0		23	00	0	9	0	y	parents' bed	own bed	20	20	0	0	milk	nothing	nothing	nothing	0	2								North	Yes
701	20	565	2015-05-13	2011-02-11	3980	m	1991	Works at home	High	1988	Employed	High	y	y	0	0	0		14.000	14	86.0	0.86	21	00	0	8	30	y	own bed	own bed	19	19			nothing	nothing	nothing	nothing	1	1								North	Yes
702	9	518	2015-05-13	2008-04-04	2190	m	1969	Employed	University	1976	Employed	High	y	n	0	1	0		21.000	21	120.0	1.2	21	00	0	7	15	y	own bed	own bed	20	20	0	0	nothing	nothing	nothing	nothing	0	0								North	Yes
704	4	491	2015-05-13	2005-09-16	3300	m	1980	Works at home	Middle	1977	Employed	High	y	y	2	0	0		42.500	42.5	143.0	1.43	21	30	30	7	0	y	own bed	own bed	19	19	30	30	nothing	nothing	nothing	nothing	0	0								South	Yes
705	9	485	2015-05-13	2003-05-03	3050	f	1974	Employed	University	1971	Employed	University	y	y	0	1	0		32.800	32.8	154.0	1.54	22	00	0	7	15	y	own bed	own bed	20	20	30	30	nothing	nothing	nothing	nothing	2	0								North	No
706	9	485	2015-05-13	2003-04-26	3400	m	1971	Employed	High	1970	Employed	High	y	y	0	0	0		46.100	46.1	155.0	1.55	22	15	15	7	15	y	other room	own bed	20	20	0	0	nothing	nothing	nothing	nothing	2	0								North	Yes
707	15	504	2015-05-13	2005-02-01	3300	m	1971	Works at home	High	1968	Employed	High	y	y	0	0	0		59.000	59	142.0	1.42	22	30	30	7	0	y	own bed	own bed	20	20	30	30	nothing	sweet	nothing	nothing	0	0								South	Yes
708	9	518	2015-05-13	2008-04-04	2270	f	1969	Employed	University	1976	Employed	High	y	n	0	1	0		19.300	19.3	120.0	1.2	21	00	0	7	30	y	own bed	own bed	20	20	0	0	nothing	nothing	nothing	nothing	0	0								North	No
709	4	491	2015-05-13	2014-01-09	3230	f	1974	Unemployed	University	1977	Employed	University	y	y	2	0	0		12.200	12.2	79.5		21	15	15	6	30	n	own bed	own bed	19	19	30	30	milk	nothing	nothing	nothing	0	3								South	No
710	9	510	2015-05-13	2013-12-26	3280	m	1973	Employed	University	1961	Employed	University	y	y	0	0	0		13.200	13.2	80.0		21	30	30	7	45	y	own bed	parents' bed	19	19	30	30	milk	sweet	nothing	nothing	2	1.5								North	Yes
711	9	513	2015-05-13	2006-09-28	3350	m	1977	Employed	High	1975	Employed	High	y	y	1	1	0		26.100	26.1	126.0	1.26	22	30	30	7	0	c	own bed	own bed	20	20	30	30	nothing	sweet	nothing	nothing	0	0								North	Yes
712	9	513	2015-05-13	2004-01-17	3450	f	1977	Employed	High	1975	Employed	High	y	y	0	2	0		33.800	33.8	148.0	1.48	22	45	45	7	0	c	own bed	own bed	20	20	30	30	nothing	nothing	nothing	nothing	0	0								North	No
713	9	513	2015-05-13	2010-05-02	1600	f	1977	Employed	University	1974	Employed	High	y	y	0	0	0		18.400	18.4	109.0	1.09	21	15	15	8	15	y	parents' bed	parents' bed	19	19	30	30	nothing	nothing	nothing	nothing	1	0								North	No
714	15	519	2015-05-13	2008-04-19	3460	f	1982	Works at home	Middle	1978	Employed	High	y	y	1	0	0		19.000	19	125.0	1.25	22	30	30	7	0	c	own bed	own bed	21	21	0	0	juice	salted	nothing	nothing	0	0								South	No
715	15	519	2015-05-13	2005-02-15	2680	m	1982	Works at home	Middle	1978	Employed	High	y	y	0	1	0		34.000	34	138.0	1.38	21	00	0	7	0	y	own bed	own bed	20	20	0	0	juice	salted	nothing	nothing	0	0								South	Yes
716	15	519	2015-05-13	2012-06-21	3825	m	1985	Works at home	Middle	1976	Employed	Middle	y	y	2	0	0		14.000	14	91.0	0.91	21	45	45	7	15	c	parents' bed	own bed	20	20	0	0	juice	nothing	juice	nothing	2	1								South	Yes
717	15	519	2015-05-13	2007-09-27	3650	f	1982	Works at home	Middle	1977	Employed	Middle	y	y	1	1	0		25.000	25	116.0	1.16	22	15	15	7	15	c	own bed	own bed	21	21	0	0	nothing	nothing	nothing	nothing	0	0								South	No
718	15	519	2015-05-13	2005-06-24	2580	m	1986	Works at home	Middle	1984	Employed	Middle	y	y	0	1	0		36.000	36	137.0	1.37	23	00	0	7	0	c	own bed	own bed	21	21	0	0	nothing	nothing	nothing	nothing	0	0								South	Yes
720	9	507	2015-05-14	2009-06-11	3670	m	1976	Employed	High	1977	Employed	High	y	n	0	0	0		21.000	21	119.0	1.19	22	00	0	8	0	y	own bed	own bed	19	19	30	30	milk	other	nothing	nothing	0	0								North	Yes
721	9	507	2015-05-14	2012-11-24	3260	f	1981	Employed	High	1981	Employed	Middle	y	y	0	1	1		12.000	12	90.0	0.9	22	00	0	7	30	n	other room	own bed	20	20	0	0	nothing	nothing	nothing	nothing	1	2								North	No
722	20	575	2015-05-14	2014-04-21	4110	f	1985	Works at home	Middle	1981	Employed	Middle	y	y	1	0	0		9.800	9.8	80.0		22	30	30	7	30	n	own bed	own bed	19	19	0	0	milk	fruit & sweet	milk	nothing	1	2								North	No
723	9	515	2015-05-13	2004-04-08	2870	f	1972	Employed	High	1972	Employed	High	y	y	1	0	0		42.600	42.6	139.0	1.39	21	15	15	7	15	y	own bed	own bed	19	19	45	45	nothing	nothing	nothing	nothing	0	0								North	No
724	9	515	2015-05-13	2006-05-01	3300	m	1976	Employed	High	1972	Employed	High	y	y	0	1	0		29.100	29.1	133.0	1.33	20	45	45	7	0	c	own bed	own bed	19	19	15	15	nothing	nothing	nothing	nothing	0	0								North	Yes
725	9	515	2015-05-12	2009-04-21	3600	m	1976	Employed	High	1972	Employed	High	y	y	1	0	0		19.000	19	110.0	1.1	20	45	45	7	0	c	own bed	own bed	19	19	15	15	nothing	nothing	nothing	nothing	0	0								North	Yes
726	9	515	2015-05-07	2009-03-26	4240	m	1986	Employed	High	1984	Employed	University	y	y	0	1	0		22.300	22.3	125.0	1.25	21	30	30	7	30	c	own bed	own bed	20	20	0	0	nothing	nothing	nothing	nothing	0	0								North	Yes
727	9	515	2015-05-07	2012-08-05	4000	f	1986	Employed	High	1984	Employed	University	y	y	1	0	0		14.600	14.6	93.0	0.93	22	30	30	8	0	c	parents' bed	own bed	20	20	0	0	nothing	nothing	nothing	nothing	2	2								North	No
728	9	515	2015-05-05	2005-02-09	3075	f	1967	Employed	High	1965	Employed	High	y	y	1	1	0		41.500	41.5	147.0	1.47	21	00	0	7	0	c	own bed	own bed	19	19	0	0	nothing	nothing	nothing	nothing	0	0								North	No
729	20	489	2015-05-14	2012-05-12	3000	m	1975	Works at home	Middle	1972	Employed	High	y	y	1	0	0		15.000	15	96.0	0.96	20	30	30	7	0	y	other room	own bed	19	19	30	30	nothing	nothing	nothing	nothing	0	1								North	Yes
731	9	507	2015-05-14	2012-11-04	3450	m	1978	Employed	University	1981	Employed	University	y	y	0	1	1		15.500	15.5	96.0	0.96	22	45	45	9	0	n	own bed	own bed	20	20	30	30	milk	nothing	nothing	nothing	0	2								North	Yes
732	15	508	2015-05-14	2008-08-02	3700	m	1971	Employed	University	1972	Employed	University	y	y	0	1	0		22.500	22.5	119.5	1.195	22	30	30	7	15	y	own bed	own bed	20	20	0	0	nothing	nothing	nothing	nothing	0	0								South	Yes
733	16	548	2015-05-14	2004-04-17	3500	f	1977	Employed	High	1973	Employed	High	y	y	1	0	0		28.500	28.5	126.5	1.265	22	30	30	7	30	y	parents' bed	own bed	20	20	30	30	nothing	nothing	nothing	nothing	0	0								Center	No
735	9	485	2015-05-14	2013-08-15	3200	f	1985	Employed	University	1983	Employed	University	y	y	0	0	0		11.000	11	82.0		21	15	15	7	30	y	other room	own bed	19	19	15	15	nothing	nothing	nothing	nothing	3	0.5								North	No
736	15	508	2015-05-14	2009-09-21	3550	f	1984	Employed	High	1980	Employed	High	y	y	0	1	0		17.500	17.5	108.0	1.08	22	30	30	7	30	n	own bed	own bed	21	21	0	0	nothing	nothing	nothing	nothing	1	0								South	No
737	9	485	2015-05-14	2004-02-05	3450	m	1974	Employed	High	1969	Employed	University	y	n	0	1	1		39.500	39.5	147.5	1.475	23	00	0	7	15	y	parents' bed	parents' bed	20	20	15	15	nothing	nothing	nothing	nothing	3	0								North	Yes
739	9	484	2015-05-14	2012-04-14	3560	f	1978	Employed	University	1971	Unemployed	High	y	y	1	0	0		13.200	13.2	88.5	0.885	21	30	30	7	15	c	parents' bed	own bed	19	19	0	0	nothing	nothing	nothing	nothing	2	1.5								North	No
740	9	525	2015-05-14	2010-06-28	3490	m	1975	Works at home	Middle	1973	Employed	Middle	y	y	2	0	0		20.000	20	107.0	1.07	23	30	30	10	0	n	parents' bed	parents' bed	20	20	0	0	nothing	salted	nothing	nothing	3	0								North	Yes
741	9	484	2015-05-14	2001-07-28	3300	m	1978	Employed	Middle	1976	Employed	Middle	y	n	0	1	0		65.000	65	166.0	1.66	22	45	45	7	15	c	own bed	own bed	21	21	30	30	nothing	nothing	nothing	nothing	0	0								North	Yes
742	9	525	2015-05-08	2013-03-03	4000	m	1976	Works at home	Middle	1982	Employed	High	y	y	1	0	0		14.000	14	97.0	0.97	22	15	15	7	30	c	other room	own bed	19	19	30	30	milk	salted	milk	nothing	4	2								North	Yes
743	9	525	2015-05-08	2013-10-20	3080	m	1976	Employed	High	1975	Employed	High	y	y	0	0	0		11.400	11.4	87.0		22	00	0	7	0	y	other room	own bed	20	20	0	0	nothing	nothing	nothing	nothing	0	2								North	Yes
745	9	484	2015-05-14	2010-01-19	3330	m	1970	Employed	University	1967	Employed	High	y	y	0	0	0		20.100	20.1	115.0	1.15	21	30	30	7	30	y	own bed	own bed	19	19	15	15	nothing	nothing	nothing	nothing	0	0								North	Yes
746	9	512	2015-05-14	2013-02-22	3060	f	1980	Employed	High	1974	Employed	High	y	y	0	0	0		12.000	12	91.0	0.91	22	00	0	7	30	y	own bed	own bed	20	20	0	0	milk	nothing	nothing	nothing	0	2								North	No
747	9	559	2015-05-14	2010-05-02	2600	f	1976	Employed	High	1976	Employed	High	y	y	0	1	0		24.000	24	113.0	1.13	21	30	30	7	0	c	own bed	own bed	19	19	30	30	nothing	nothing	nothing	nothing	0	0								North	No
748	9	542	2015-05-14	2009-04-12	2900	f	1979	Employed	University	1977	Employed	High	y	y	0	1	0		22.000	22	115.0	1.15	21	00	0	7	0	c	own bed	own bed	19	19	30	30	nothing	nothing	nothing	nothing	0	0								North	No
749	9	559	2015-05-14	2005-01-27	2740	m	1967	Employed	Middle	1962	Employed	Middle	y	y	0	0	0		35.000	35	145.0	1.45	23	15	15	7	30	y	own bed	own bed	20	20	30	30	milk	sweet	nothing	nothing	0	0								North	Yes
750	9	503	2015-05-14	2004-03-19	2870	m	1963	Employed	High	1964	Other	High	y	n	1	0	0		34.000	34	143.0	1.43	23	30	30	7	45	c	parents' bed	parents' bed	19	19	45	45	nothing	nothing	nothing	nothing	0	0								North	Yes
751	9	542	2015-05-14	2011-11-04	2990	m	1977	Employed	University	1976	Unemployed	High	y	y	0	0	0		17.000	17	98.0	0.98	23	30	30	7	15	y	other room	own bed	20	20	30	30	milk	nothing	nothing	nothing	0	1.5								North	Yes
752	9	511	2015-05-14	2005-04-24	3350	f	1977	Employed	Middle	1977	Employed	Middle	y	y	0	1	0		52.000	52	154.0	1.54	22	30	30	7	30	c	own bed	own bed	20	20	15	15	nothing	nothing	nothing	nothing	0	0								North	No
753	9	525	2015-05-14	2008-10-25	3200	m	1981	Employed	Middle	1979	Unemployed	Middle	y	y	0	0	0		23.500	23.5	118.0	1.18	22	45	45	7	15	n	parents' bed	parents' bed	20	20	15	15	nothing	nothing	nothing	nothing	0	0								North	Yes
754	9	513	2015-05-14	2004-09-14	4000	m	1971	Employed	High	1967	Employed	Middle	y	y	1	0	0		28.600	28.6	136.0	1.36	22	45	45	6	45	c	own bed	own bed	19	19	15	15	nothing	nothing	nothing	nothing	0	0								North	Yes
755	9	512	2015-05-14	2011-10-14	4000	m	1977	Employed	High	1972	Employed	High	y	y	1	0	0		16.900	16.9	103.5	1.035	21	30	30	7	0	n	own bed	own bed	19	19	30	30	nothing	nothing	nothing	nothing	0	1								North	Yes
756	20	499	2015-05-14	2010-05-07	3150	f	1980	Works at home	High	1964	Employed	Middle	y	y	0	0	0		25.200	25.2	113.0	1.13	21	30	30	7	45	y	other room	parents' bed	19	19	30	30	nothing	sweet	nothing	nothing	2	0								North	No
757	15	516	2015-05-14	2009-04-30	3800	m	1980	Works at home	Middle	1980	Other	Middle	y	y	0	1	0		16.000	16	113.0	1.13	22	30	30	8	0	n	parents' bed	parents' bed	20	20	30	30	nothing	nothing	nothing	nothing	1	0								South	Yes
758	15	516	2015-05-14	2010-09-24	3200	f	1980	Works at home	Middle	1980	Other	Middle	y	y	1	0	0		15.000	15	104.0	1.04	23	00	0	9	30	n	parents' bed	parents' bed	20	20	30	30	milk	nothing	nothing	nothing	0	0								South	No
759	20	499	2015-05-14	2009-01-17	2960	f	1972	Employed	High	1972	Employed	High	y	y	0	0	0		21.600	21.6	117.0	1.17	22	00	0	7	0	y	own bed	own bed	20	20	0	0	nothing		nothing	nothing	0	0								North	No
760	15	516	2015-05-14	2005-12-22	3235	m	1976	Employed	High	1977	Employed	Middle	y	y	0	2	2		44.000	44	137.0	1.37	21	30	30	7	30	y	outside home	own bed	20	20	30	30	nothing	nothing	nothing	nothing	0	0								South	Yes
761	15	516	2015-05-14	2007-08-10	2970	f	1976	Employed	High	1977	Employed	Middle	y	y	1	1	2		26.000	26	127.0	1.27	21	30	30	7	0	c	own bed	own bed	20	20	30	30	nothing	nothing	nothing	nothing	0	0								South	No
762	9	532	2015-05-15	2012-09-22	3410	m	1980	Employed	High	1978	Employed	High	y	y	0	0	0		12.800	12.8	93.3	0.933	21	15	15	7	30	y	own bed	own bed	19	19	45	45	nothing	nothing	nothing	nothing	0	1.25								North	Yes
763	15	508	2015-05-15	2013-09-23	3240	f	1978	Employed	High	1975	Employed	High	y	y	1	0	0		13.300	13.3	85.8		22	30	30	7	30	n	own bed	own bed	20	20	0	0	nothing	nothing	nothing	nothing	0	2								South	No
764	15	516	2015-05-15	2011-03-06	3500	m	1981	Employed	Middle	1978	Other	Middle	y	y	0	0	0		18.000	18	110.0	1.1	23	30	30	7	45	y	own bed	own bed	20	20	30	30	nothing	fruit & sweet	nothing	nothing	1	2								South	Yes
765	17	534	2015-05-15	2008-04-09	2950	m	1978	Employed	High	1980	Employed	High	y	y	0	0	0		20.000	20	120.0	1.2	21	00	0	7	0	y	parents' bed	parents' bed	19	19	15	15	other	fruit	nothing	nothing	0	0								North	Yes
766	15	516	2015-05-15	2012-10-02	3750	m	1985	Employed	High	1986	Employed	High	y	y	0	1	0		13.000	13	92.0	0.92	23	30	30	8	0	y	other room	own bed	20	20	30	30	nothing	nothing	nothing	nothing	1	2								South	Yes
767	17	534	2015-05-15	2011-04-24	4200	m	1985	Unemployed	High	1983	Employed	High	y	y	1	1	0		19.000	19	108.0	1.08	20	45	45	7	15	y	own bed	own bed	19	19	45	45	nothing	nothing	nothing	nothing	0	0.5								North	Yes
768	17	534	2015-05-14	2008-03-21	3960	m	1980	Employed	University	1980	Employed	Middle	y	y	0	1	0		21.000	21	125.0	1.25	20	30	30	7	0	y	own bed	own bed	18	18	45	45	milk	sweet	nothing		0	0								North	Yes
769	9	511	2015-05-15	2014-03-08	2800	f	1980	Works at home	High	1979	Employed	High	y	y	0	0	0		8.600	8.6	77.5		21	00	0	6	30	n	own bed	own bed	19	19	0	0	nothing	nothing	nothing	nothing	0	4								North	No
770	9	525	2015-05-15	2014-01-25	3600	f	1992	Employed	High	1989	Employed	High	y	y	0	0	0		10.700	10.7	80.5		22	15	15	8	30	y	own bed	own bed	20	20	0	0	nothing	nothing	nothing	nothing	2	1								North	No
771	9	522	2015-05-15	2011-03-19	3700	m	1979	Employed	University	1975	Employed	High	y	y	0	0	0		18.000	18	108.0	1.08	21	30	30	8	0	y	parents' bed	parents' bed	19	19	30	30	nothing	sweet	nothing	nothing	0	0								North	Yes
773	15	572	2015-05-08	2008-09-25	3350	m	1974	Works at home	High	1969	Employed	High	y	y	0	1	0		20.000	20	110.0	1.1	21	00	0	7	0	c	parents' bed	own bed	20	20	0	0	juice	fruit	nothing	nothing	0	0								South	Yes
775	15	572	2015-05-13	2012-04-20	3200	f	1980	Employed	University	1977	Employed	High	y	y	0	1	0		15.000	15	95.0	0.95	0	15	15	9	30	n	other room	parents' bed	19	19	30	30	nothing	nothing	nothing	nothing	1	2.25								South	No
777	9	525	2015-05-15	2014-05-10	2920	m	1984	Employed	High	1978	Employed	University	y	y	0	0	0		8.900	8.9	73.0		22	30	30	8	30	y	parents' bed	parents' bed	19	19	0	0	milk	nothing	milk	nothing	1	2								North	Yes
778	15	572	2015-05-13	2011-12-01	3300	f	1981	Works at home	Middle	1980	Employed	Middle	y	y	0	0	0		15.000	15	97.0	0.97	22	30	30	7	45	y	parents' bed	parents' bed	20	20	0	0	nothing	nothing	nothing	nothing	0	2								South	No
779	15	572	2015-05-13	2013-06-19	4430	f	1992	Student	High	1990	Employed	High	y	y	0	0	3		11.000	11	81.0		23	30	30	8	30	n	parents' bed	parents' bed	20	20	0	0	milk	nothing	nothing	nothing	2	2								South	No
780	15	572	2015-05-13	2008-05-25	3030	f	1982	Works at home	High	1978	Employed	High	y	y	0	1	0		23.000	23	123.0	1.23	22	00	0	7	0	y	own bed	own bed	20	20	30	30	milk	other	nothing	nothing	0	0								South	No
781	15	572	2015-05-13	2007-02-21	3750	m	1972	Works at home	High	1963	Employed	High	y	y	0	0	0		41.000	41	134.0	1.34	23	30	30	7	30	y	parents' bed	parents' bed	19	19	0	0	nothing	nothing	nothing	nothing	0	0								South	Yes
782	15	572	2015-05-13	2013-10-31	3240	m	1984	Employed	University	1983	Employed	University	y	y	0	0	0		13.000	13	84.0		21	30	30	8	45	y	own bed	own bed	21	21	15	15	milk	nothing	nothing	nothing	1	1								South	Yes
783	15	572	2015-05-14	2009-10-25	2850	f	1975	Employed	Middle	1975	Employed	High	y	y	2	0	0		20.000	20	112.0	1.12	21	30	30	7	0	y	parents' bed	own bed	20	20	0	0	nothing	nothing	nothing	nothing	0	0								South	No
784	20	574	2015-05-15	2013-09-27	2790	f	1983	Employed	University	1980	Employed	High	y	y	0	0	0		9.000	9	81.0		21	00	0	8	15	y	own bed	own bed	19	19	30	30	nothing	nothing	nothing	nothing	1	2.5								North	No
786	15	572	2015-05-13	2011-07-14	2950	m	1982	Unemployed	High	1974	Employed	High	y	y	0	1	0		17.000	17	101.5	1.015	22	30	30	8	15	y	own bed	parents' bed	20	20	0	0	nothing	nothing	nothing	nothing	1	1.5								South	Yes
787	9	559	2015-05-15	2012-12-02	2750	f	1972	Employed	University	1976	Employed	High	y	y	0	1	0		12.000	12	90.0	0.9	21	30	30	8	0	c	other room	own bed	20	20	30	30	nothing	nothing	nothing	nothing	0	1								North	No
789	15	572	2015-05-07	2014-02-03	2700	m	1981	Works at home	High	1978	Employed	University	y	y	0	1	4		12.000	12	79.0		22	00	0	7	0	n	own bed	own bed	21	21	0	0	milk	nothing	nothing	nothing	1	2								South	Yes
791	20	575	2015-05-15	2011-01-17	3820	f	1971	Employed	University	1971	Unemployed	High	y	y	3	0	0		20.300	20.3	109.0	1.09	21	45	45	7	30	y	own bed	own bed	20	20	15	15	nothing	nothing	nothing	nothing	0	1								North	No
792	9	484	2015-05-15	2006-12-19	3010	f	1974	Employed	High	1980	Employed	University	y	y	0	2	0		26.100	26.1	131.0	1.31	22	30	30	6	30	c	parents' bed	own bed	20	20	0	0	nothing	sweet	nothing	nothing	1	0								North	No
793	20	574	2015-05-15	2009-01-20	3250	m	1981	Employed	High	1974	Employed	High	y	y	0	1	0		23.000	23	116.0	1.16	21	45	45	8	0	c	other room	own bed	20	20	0	0	milk	nothing	nothing		0	0								North	Yes
794	16	548	2015-05-15	2012-07-23	3380	m	1980	Employed	High	1976	Employed	High	y	y	0	0	0		14.000	14	94.0	0.94	21	45	45	7	30	y	outside home	own bed	19	19	30	30	nothing	nothing	nothing	nothing	1	2								Center	Yes
795	9	484	2015-05-15	2010-03-04	3800	f	1978	Employed	High	1974	Employed	University	y	y	1	1	0		20.500	20.5	117.0	1.17	21	30	30	7	30	c	parents' bed	own bed	20	20	0	0	nothing	sweet	nothing	nothing	0	0.25								North	No
796	20	575	2015-05-15	2013-05-12	3360	f	1978	Employed	High	1973	Employed	High	y	y	1	0	0		10.800	10.8	87.0	0.87	21	45	45	7	15	c	own bed	own bed	19	19	30	30	nothing	nothing	nothing	nothing	1	2								North	No
797	20	575	2015-05-15	2010-11-27	3450	f	1978	Employed	High	1973	Employed	High	y	y	0	1	0		20.300	20.3	111.5	1.115	21	45	45	7	0	c	own bed	own bed	19	19	30	30	nothing	nothing	nothing	nothing	0	0								North	No
798	9	507	2015-05-15	2003-03-14	3380	m	1971	Unemployed	High	1970	Employed	High	y	y	0	1	0		50.000	50	154.0	1.54	22	30	30	6	45	y	own bed	own bed	21	21	0	0	nothing	sweet	nothing	nothing	0	0								North	Yes
799	9	507	2015-05-15	2007-05-09	3900	f	1971	Unemployed	High	1970	Employed	High	y	y	1	0	0		33.000	33	133.0	1.33	22	30	30	7	15	y	own bed	own bed	19	19	30	30	nothing	sweet	nothing	nothing	0	0								North	No
800	9	484	2015-05-15	2003-12-27	3370	m	1968	Employed	Middle	1965	Employed	Middle	y	y	1	0	0		58.000	58	159.0	1.59	23	15	15	7	0	c	own bed	own bed	20	20	0	0	nothing	nothing	nothing	nothing	0	0								North	Yes
801	20	487	2015-05-15	2011-11-11	3260	f	1973	Works at home	High	1970	Employed	High	y	y	1	0	0		15.800	15.8	105.0	1.05	22	00	0	7	15	c	own bed	own bed	20	20	0	0	nothing	nothing	nothing	nothing	1	1		y						North	No
803	9	507	2015-05-15	2013-02-10	3550	m	1987	Employed	High	1985	Employed	High	y	y	0	0	0		16.000	16	93.0	0.93	21	00	0	6	30	y	parents' bed	parents' bed	20	20	0	0	nothing	nothing	nothing	nothing	1	2								North	Yes
804	15	541	2015-05-14	2012-04-24	2400	f	1990	Works at home	Middle	1984	Employed	Middle	y	y	0	1	0		13.400	13.4	89.0	0.89	23	00	0	8	0	n	other room	other room	21	21	0	0	milk	fruit	nothing	nothing	0	0.75								South	No
805	15	541	2015-05-14	2010-02-03	3550	m	1986	Employed	High	1982	Employed	High	y	y	0	1	0		29.000	29	115.0	1.15	23	00	0	7	30	y	own bed	own bed	21	21	0	0	nothing	nothing	nothing	nothing	1	0								South	Yes
806	15	541	2015-05-14	2012-05-04	3600	f	1986	Unemployed	Middle	1983	Employed	Middle	y	y	1	0	0		17.000	17	92.0	0.92	23	00	0	8	30	y	own bed	own bed	22	22	30	30	nothing	nothing	nothing	nothing	0	1.25								South	No
807	15	541	2015-05-14	2008-08-29	3010	f	1986	Unemployed	Middle	1983	Employed	Middle	y	y	0	1	0		36.000	36	128.0	1.28	22	00	0	7	0	y	own bed	own bed	21	21	30	30	nothing	nothing	nothing	nothing	0	1.25								South	No
808	15	519	2015-05-15	2002-01-11	3500	m	1990	Unemployed	Middle	1986	Unemployed	None	y	y	0	2	0		50.000	50	152.0	1.52	23	00	0	7	0	c	own bed	own bed	20	20	15	15	nothing	nothing	nothing	nothing	0	0								South	Yes
809	15	519	2015-05-15	2007-10-11	3200	m	1990	Employed	Middle	1986	Employed	None	y	y	1	1	0		20.000	20	120.0	1.2	22	15	15	7	15	c	own bed	own bed	20	20	15	15	juice	nothing	nothing	nothing	0	0								South	Yes
810	15	519	2015-05-15	2009-09-11	3000	m	1990	Unemployed	Middle	1986	Unemployed	None	y	y	1	1	0		20.000	20	112.0	1.12	21	30	30	7	15	c	parents' bed	parents' bed	20	20	15	15	juice	nothing	nothing	nothing	1	1								South	Yes
811	15	519	2015-05-15	2008-09-18	2800	m	1986	Employed	High	1986	Employed	Middle	y	y	0	1	0		21.000	21	114.0	1.14	22	15	15	7	0	c	own bed	own bed	21	21	0	0	nothing	nothing	nothing	nothing	0	0								South	Yes
812	15	519	2015-05-15	2012-10-07	3000	m	1986	Employed	High	1986	Employed	Middle	y	y	1	0	0		11.500	11.5	85.0	0.85	21	00	0	7	0	c	parents' bed	parents' bed	20	20	0	0	milk	nothing	juice	nothing	2	2	y							South	Yes
813	15	519	2015-05-15	2012-05-08	2850	m	1990	Employed	High	1989	Employed	High	y	y	0	0	0		14.000	14	98.0	0.98	22	00	0	6	30	y	parents' bed	parents' bed	20	20	0	0	milk	nothing	juice	nothing	1	0.5								South	Yes
814	15	519	2015-05-15	2010-04-18	2950	f	1988	Employed	High	1988	Employed	High	y	y	0	0	1		20.000	20	113.0	1.13	22	00	0	7	15	y	own bed	own bed	20	20	0	0	nothing	nothing	nothing	nothing	0	0								South	No
815	17	534	2015-05-14	2011-12-24	3420	f	1976	Unemployed	High	1977	Employed	High	y	y	0	1	0		15.500	15.5	99.0	0.99	21	00	0	7	45	y	parents' bed	own bed	19	19	30	30	milk	nothing	nothing	nothing	1	0								North	No
816	9	522	2015-05-15	2012-05-02	2440	m	1980	Employed	High				y	n	0	0	0	n	13.000	13	98.5	0.985	22	00	0	7	30	y	other room	own bed	19	19	30	30	milk	nothing	nothing	nothing	0	0								North	Yes
818	15	508	2015-05-19	2010-08-25	3200	f	1981	Works at home	Middle	1982	Employed	Middle	y	y	0	0	0		19.000	19	103.0	1.03	21	45	45	8	0	n	own bed	own bed	20	20	0	0	nothing	nothing	nothing	nothing	3	0								South	No
819	15	508	2015-05-19	2013-12-09	3580	f	1970	Employed	High	1970	Employed	High	y	y	2	0	0		10.300	10.3	80.0		0	30	30	7	45	n	own bed	own bed	20	20	30	30	nothing	nothing	nothing	nothing	2	3								South	No
820	17	534	2015-05-19	2005-12-18	3060	f	1980	Employed	High	1975	Employed	High	y	y	0	1	0		23.800	23.8	131.0	1.31	21	00	0	7	0	y	own bed	own bed	19	19	0	0	nothing	nothing	nothing	nothing	0	0								North	No
821	17	534	2015-05-19	2008-07-31	3150	f	1979	Employed	High	1968	Employed	High	y	y	0	1	0		24.000	24	125.0	1.25	20	30	30	7	0	y	own bed	own bed	19	19	45	45	nothing	nothing	nothing	nothing	2	0								North	No
822	15	516	2015-05-19	2013-04-26	3600	m	1985	Works at home	Middle	1982	Employed	Middle	y	y	1	1	0		14.000	14	90.0	0.9	23	00	0	7	30	n	parents' bed	parents' bed	22	22	0	0	nothing	nothing	nothing	nothing	3	1								South	Yes
823	15	508	2015-05-19	2013-05-11	2640	m	1979	Employed	Middle	1972	Employed	High	y	y	1	0	0		10.300	10.3	81.0	0.81	22	30	30	8	0	n	own bed	own bed	20	20	0	0	milk	nothing	nothing	nothing	0	0.75								South	Yes
824	9	510	2015-05-19	2013-05-07	3500	f	1984	Employed	University	1982	Employed	University	y	y	0	1	0		11.000	11	82.0	0.82	22	00	0	7	15	y	own bed	own bed	19	19	30	30	nothing	nothing	nothing	nothing	0	2								North	No
825	15	516	2015-05-19	2006-08-04	3000	f	1985	Works at home	Middle	1982	Employed	Middle	y	y	0	2	0		30.000	30	130.0	1.3	22	00	0	7	0	y	own bed	own bed	20	20	30	30	nothing	nothing	nothing	nothing	0	0								South	No
826	15	508	2015-05-19	2013-12-18	3545	f	1984	Works at home	High	1981	Employed	Middle	y	y	0	0	0		11.000	11	79.0		24	00	0	8	30	n	own bed	own bed	20	20	0	0	milk	nothing	nothing	nothing	1	1.5								South	No
827	9	510	2015-05-19	2009-11-29	3150	m	1979	Employed	High	1976	Employed	Middle	y	y	2	0	0		17.500	17.5	108.5	1.085	21	30	30	7	45	c	parents' bed	parents' bed	19	19	30	30	nothing	nothing	nothing	nothing	1	0								North	Yes
828	9	559	2015-05-19	2012-12-28	3200	f	1977	Employed	University	1976	Employed	High	y	y	1	0	0		14.000	14	95.0	0.95	22	45	45	7	15	c	parents' bed	parents' bed	20	20	0	0	nothing	nothing	nothing	nothing	2	1.5								North	No
829	9	559	2015-05-19	2009-02-16	3450	f	1980	Employed	High	1981	Employed	High	y	y	0	1	0		26.000	26	110.0	1.1	22	00	0	9	0	c	own bed	own bed	20	20	0	0	nothing	nothing	nothing	nothing	1	1								North	No
830	9	484	2015-05-19	2010-11-12	3820	m	1987	Employed	Middle	1981	Employed	Middle	y	y	0	1	0		19.900	19.9	111.0	1.11	22	30	30	8	15	c	parents' bed	parents' bed	20	20	15	15	juice	fruit	nothing	nothing	1	1								North	Yes
831	9	484	2015-05-19	2013-04-26	4245	f	1987	Employed	Middle	1981	Employed	Middle	y	y	1	0	0		15.600	15.6	93.5	0.935	22	30	30	8	45	c	parents' bed	parents' bed	20	20	15	15	nothing	nothing	nothing	nothing	0	2								North	No
832	9	525	2015-05-19	2009-11-09	3000	m	1977	Employed	High	1977	Employed	High	y	y	0	1	0		15.300	15.3	100.0	1	21	00	0	7	0	c	own bed	parents' bed	19	19	30	30	nothing	nothing	nothing	nothing	0	0								North	Yes
833	9	484	2015-05-19	2014-02-05	3090	f	1974	Works at home	Middle	1969	Employed	High	y	y	1	0	0		10.200	10.2	84.0		21	45	45	7	30	n	own bed	own bed	19	19	0	0	milk	sweet	nothing	nothing	0	2.5								North	No
834	9	525	2015-05-19	2011-09-23	2860	f	1977	Employed	High	1977	Employed	High	y	y	1	0	1		11.600	11.6	97.0	0.97	21	15	15	7	0	c	own bed	own bed	19	19	30	30	nothing	nothing	nothing	nothing	0	1.5								North	No
835	9	521	2015-05-19	2005-10-13	2980	f	1987	Employed	High	1982	Employed	High	y	n	0	1	1		31.000	31	139.0	1.39	21	15	15	7	0	y	own bed	own bed	19	19	30	30	nothing	sweet	nothing	nothing	0	0								North	No
836	20	571	2015-05-19	2004-02-09	3350	f	1968	Employed	University	1972	Other	High	y	y	0	1	0		31.900	31.9	147.0	1.47	21	30	30	7	0	c	own bed	own bed	20	20	0	0	nothing	nothing	nothing	nothing	0	0								North	No
838	9	558	2015-05-19	2013-04-09	2800	f	1970	Employed	High	1969	Employed	High	y	y	1	0	4		12.900	12.9	87.0	0.87	22	00	0	7	0	y	own bed	own bed	19	19	30	30	milk	nothing	nothing	fruit	1	0								North	No
839	9	558	2015-05-19	2003-10-02	2460	f	1975	Employed	High	1974	Employed	High	y	y	0	0	3		39.100	39.1	156.5	1.565	22	30	30	7	0	y	own bed	own bed	20	20	0	0	nothing	nothing	nothing	nothing	0	0								North	No
841	9	560	2015-05-19	2003-11-16	2770	f	1980	Employed	Middle	1977	Employed	Middle	y	y	0	2	0		76.000	76	151.0	1.51	21	00	0	6	45	c	own bed	own bed	20	20	0	0	nothing	fruit	nothing	nothing	1	0								North	No
842	20	499	2015-05-19	2010-08-06	3360	f	1978	Employed	High	1973	Employed	High	y	y	0	1	0		20.300	20.3	108.5	1.085	20	45	45	7	0	c	own bed	own bed	19	19	30	30	nothing	nothing	nothing	nothing	0	0								North	No
843	9	560	2015-05-19	2013-11-29	2935	m	1972	Employed	University	1970	Works at home	High	y	y	0	0	0		9.800	9.8	78.5		22	00	0	7	0	y	own bed	own bed	19	19	30	30	milk	nothing	milk	nothing	2	1.5								North	Yes
844	9	554	2015-05-19	2008-05-14	2970	f	1970	Employed	High	1971	Employed	University	y	y	1	0	0		26.500	26.5	124.0	1.24	21	00	0	7	15	c	own bed	own bed	19	19	0	0	nothing	sweet	nothing	nothing	0	0								North	No
845	9	521	2015-05-19	2010-05-14	2950	f	1974	Employed	High	1970	Employed	High	y	y	1	0	0		19.000	19	106.0	1.06	21	30	30	7	45	y	parents' bed	own bed	19	19	30	30	nothing	sweet	nothing	nothing	0	0								North	No
846	9	542	2015-05-19	2013-04-30	2300	f	1982	Works at home	Middle	1980	Employed	Middle	y	y	0	0	0		12.500	12.5	88.0	0.88	22	15	15	4	45	y	parents' bed	parents' bed	18	18	45	45	milk	nothing	nothing	nothing	0	2								North	No
847	9	507	2015-05-19	2011-01-24	4500	m	1972	Employed	University	1977	Employed	High	y	y	0	1	0		20.000	20	114.0	1.14	20	15	15	7	0	c	own bed	own bed	18	18	45	45	milk	nothing	nothing	nothing	0	1.5								North	Yes
849	20	499	2015-05-19	2004-09-15	3300	m	1972	Unemployed	High	1970	Employed	High	y	y	0	1	0		41.400	41.4	150.5	1.505	22	15	15	7	45	c	own bed	own bed	19	19	30	30	milk & juice	nothing	nothing	nothing	0	0								North	Yes
850	9	507	2015-05-19	2013-01-03	3800	f	1972	Employed	University	1977	Employed	High	y	y	1	0	0		12.500	12.5	88.5	0.885	20	15	15	7	0	c	own bed	own bed	18	18	45	45	milk	nothing	nothing	nothing	0	2.5								North	No
851	9	554	2015-05-19	2013-04-08	2960	m	1978	Employed	High	1977	Employed	High	y	y	0	0	0		10.800	10.8	85.0	0.85	22	45	45	8	45	n	parents' bed	own bed	19	19	30	30	nothing	nothing	nothing	nothing	2	1.5								North	Yes
852	20	499	2015-05-19	2011-06-18	3240	f	1979	Unemployed	High	1967	Employed	Middle	y	y	0	1	0		16.800	16.8	98.0	0.98	23	00	0	9	0	y	own bed	own bed	20	20	0	0	juice	sweet	nothing	nothing	0	1								North	No
853	17	534	2015-05-12	2013-05-15	3800	f	1985	Employed	High	1985	Employed	High	y	y	0	0	0		14.000	14	90.0		20	00	0	7	0	y	own bed	own bed	19	19	0	0	nothing	nothing	nothing	nothing	0	2								North	No
854	20	499	2015-05-19	2007-09-12	4100	f	1978	Employed	High	1973	Employed	Middle	y	y	1	0	0		32.000	32	132.5	1.325	22	30	30	7	0	c	own bed	own bed	19	19	30	30	nothing	sweet	nothing	nothing	0	0								North	No
855	15	508	2015-05-19	2009-11-14	3250	m	1983	Employed	High	1983	Employed	Middle	y	y	0	1	0		18.500	18.5	111.5	1.115	22	30	30	8	0	y	own bed	own bed	21	21	0	0	nothing	nothing	nothing	nothing	0	0								South	Yes
856	20	499	2015-05-19	2011-06-10	3100	f	1984	Employed	High	1983	Employed	High	y	y	0	0	0		16.300	16.3	102.0	1.02	21	30	30	7	0	y	own bed	own bed	20	20	0	0	nothing	nothing	nothing	nothing	0	0.75								North	No
857	15	497	2015-05-15	2007-03-07	3500	m	1969	Employed	University	1966	Employed	University	y	n	1	0	0		34.500	34.5	130.0	1.3	22	30	30	7	30	y	own bed	own bed	21	21	0	0	nothing	sweet	nothing	nothing	0	0								South	Yes
858	15	497	2015-05-19	2009-10-23	3100	m	1976	Works at home	High	1970	Employed	High	y	y	2	0	0		21.000	21	114.0	1.14	22	30	30	7	0	c	own bed	own bed	20	20	30	30	nothing	nothing	nothing	nothing	0	0								South	Yes
859	9	554	2015-05-20	2009-11-01	3070	f	1985	Works at home	High	1975	Employed	Middle	y	y	1	0	0		19.300	19.3	110.0	1.1	21	00	0	6	45	c	own bed	own bed	19	19	30	30	nothing	nothing	nothing	nothing	0	0								North	No
860	15	508	2015-05-20	2009-05-28	3370	f	1984	Works at home	Middle	1984	Employed	Middle	y	y	0	1	0		19.500	19.5	112.0	1.12	0	00	0	8	15	y	own bed	own bed	21	21	30	30	nothing	nothing	nothing	nothing	0	0.5								South	No
863	9	503	2015-05-20	2014-02-08	2200	f	1987	Employed	High	1985	Employed	High	y	y	0	0	0		10.000	10	82.0		21	00	0	8	0	y	parents' bed	own bed	19	19	0	0	milk	nothing	nothing	nothing	1	1.5								North	No
865	20	571	2015-05-20	2009-06-08	2700	m	1983	Employed	University	1982	Employed	High	y	y	0	1	0		18.800	18.8	113.0	1.13	21	00	0	7	15	y	own bed	own bed	19	19	15	15	nothing	nothing	nothing	nothing	0	0								North	Yes
866	17	534	2015-05-20	2012-07-02	3050	m	1971	Employed	High	1966	Employed	High	y	y	1	0	0		16.500	16.5	99.0	0.99	22	45	45	7	0	n	own bed	own bed	19	19	15	15	milk	nothing	nothing	nothing	0	2					y			North	Yes
867	9	532	2015-05-20	2012-03-20	2540	m	1971	Employed	High	1977	Employed	Middle	y	y	3	0	0		16.000	16	97.0	0.97	20	30	30	8	0	c	parents' bed	parents' bed	19	19	0	0	nothing	nothing	nothing	nothing	2	0								North	Yes
869	9	518	2015-05-20	2012-07-28	2010	f	1971	Employed	University	1974	Employed	University	y	y	0	1	0		14.300	14.3	93.0	0.93	23	30	30	8	30	y	own bed	own bed	19	19	30	30	milk	nothing	nothing	nothing	0	2								North	No
870	20	489	2015-05-20	2013-05-10	3350	f	1980	Employed	Middle	1975	Employed	High	y	y	1	0	0		12.300	12.3	86.0	0.86	20	30	30	6	30	c	other room	own bed	19	19	0	0	nothing	nothing	milk	nothing	1	2								North	No
871	9	515	2015-05-19	2007-04-17	2800	m	1968	Employed	University	1962	Employed	University	y	y	0	0	0		26.000	26	130.5	1.305	21	30	30	7	15	y	own bed	own bed	19	19	45	45	juice	nothing	nothing	nothing	0	0								North	Yes
872	9	560	2015-05-20	2013-09-10	3450	m	1976	Employed	High	1975	Employed	High	y	y	0	0	0		10.000	10	83.0		22	00	0	7	0	y	other room	parents' bed	19	19	0	0	nothing	sweet	nothing	nothing	0	2								North	Yes
873	9	554	2015-05-20	2010-09-22	3670	m	1975	Employed	University	1969	Employed	High	y	y	0	0	0		15.600	15.6	103.0	1.03	21	30	30	7	45	y	own bed	own bed	19	19	30	30	milk	sweet	nothing	nothing	2	0								North	Yes
874	9	553	2015-05-20	2013-10-24	3230	f	1980	Employed	University	1981	Employed	Middle	y	y	1	0	0		11.900	11.9	79.3		23	00	0	7	15	n	parents' bed	own bed	19	19	30	30	nothing	nothing	nothing	nothing	0	4								North	No
875	9	560	2015-05-20	2013-12-03	3240	m	1969	Employed	University	1972	Employed	Middle	y	y	1	0	0		11.700	11.7	81.0		21	30	30	7	0	n	own bed	own bed	19	19	30	30	milk	nothing	nothing	nothing	0	1.5								North	Yes
876	20	489	2015-05-20	2012-04-05	2620	m	1982	Unemployed	University	1978	Employed	University	y	y	0	0	0		13.000	13	96.0	0.96	23	15	15	6	45	y	own bed	own bed	19	19	45	45	milk	nothing	nothing	nothing	1	2.5								North	Yes
877	9	517	2015-05-19	2007-08-23	3100	f	1963	Works at home	Middle	1961	Other	University	y	y	1	0	0		29.000	29	131.0	1.31	21	30	30	7	30	y	parents' bed	parents' bed	19	19	30	30	nothing	nothing	nothing	nothing	0	0								North	No
878	9	517	2015-05-20	2010-12-20	3050	f	1976	Employed	High	1970	Employed	High	y	y	1	0	0		17.000	17	105.0	1.05	21	30	30	7	15	y	own bed	own bed	20	20	0	0	milk	nothing	nothing	nothing	1	0								North	No
879	20	571	2015-05-20	2003-11-24	3340	m	1974	Employed	High	1966	Employed	High	y	y	0	1	0		37.700	37.7	145.0	1.45	22	15	15	7	0	c	own bed	own bed	19	19	45	45	nothing	nothing	nothing	nothing	0	0								North	Yes
881	4	564	2015-04-30	2010-12-29	3100	f	1974	Unemployed	University	1972	Other	High	y	y	1	0	0		16.200	16.2	98.8	0.988	21	30	30	7	0	c	parents' bed	parents' bed	19	19	45	45	nothing	sweet	nothing	nothing	0	2								South	No
883	4	564	2015-04-30	2008-02-01	2700	f	1974	Unemployed	University	1972	Other	High	y	y	0	1	0		21.000	21	121.5	1.215	21	00	0	7	0	c	other room	own bed	19	19	45	45	nothing	nothing	nothing	nothing	0	0								South	No
884	9	559	2015-05-20	2009-07-11	3740	f	1986	Unemployed	High	1975	Employed	High	y	y	0	0	0		29.000	29	123.0	1.23	22	45	45	7	45	n	own bed	own bed	19	19	30	30	milk	nothing	nothing	nothing	1	0								North	No
885	4	564	2015-04-30	2008-09-08	3230	f	1977	Works at home	High	1974	Employed	High	y	y	0	1	0		23.000	23	115.0	1.15	22	00	0	7	15	y	parents' bed	parents' bed	19	19	30	30	nothing	nothing	nothing	nothing	0	0								South	No
886	15	508	2015-05-20	2006-02-19	2700	f	1970	Employed	Middle	1963	Employed	Elementary	y	y	2	2	0		21.700	21.7	126.5	1.265	22	15	15	7	30	c	own bed	own bed	20	20	30	30	nothing	nothing	nothing	nothing	0	0								South	No
887	9	512	2015-05-20	2011-08-02	2860	f	1977	Unemployed	High	1976	Employed	High	y	y	0	0	0		15.800	15.8	98.0	0.98	22	00	0	8	0	na	parents' bed	own bed	19	19	0	0	nothing	nothing	nothing	nothing	0	1.5								North	No
892	9	559	2015-05-20	2011-10-18	2800	m	1973	Unemployed	High	1978	Employed	High	y	y	1	0	0		17.000	17	98.0	0.98	20	15	15	6	0	c	parents' bed	parents' bed	19	19	45	45	nothing	nothing	nothing	nothing	4	1.5								North	Yes
893	9	560	2015-05-20	2013-10-10	2700	f	1984	Employed	University	1976	Employed	University	y	y	1	0	0		10.200	10.2	83.5		20	00	0	7	30	y	own bed	own bed	18	18	45	45	nothing	nothing	nothing	nothing	2	2								North	No
894	9	522	2015-05-20	2005-01-17	3730	f	1968	Employed	University	1970	Employed	High	y	y	0	1	0		31.000	31	137.0	1.37	22	30	30	7	15	c	own bed	own bed	20	20	0	0	nothing	nothing	nothing	nothing	0	0								North	No
895	9	484	2015-05-20	2003-11-11	2540	f	1975	Employed	High	1971	Employed	Middle	y	y	0	1	0		46.400	46.4	152.3	1.523	23	00	0	7	0	c	own bed	own bed	19	19	0	0	nothing	fruit	nothing	nothing	0	0								North	No
896	9	518	2015-05-20	2012-07-28	1920	f	1971	Employed	University	1974	Employed	University	y	y	1	0	0		14.300	14.3	92.0	0.92	23	30	30	8	0	y	own bed	own bed	20	20	0	0	milk	nothing	nothing	nothing	0	2								North	No
897	9	484	2015-05-20	2001-06-29	3220	f	1976	Employed	High	1968	Employed	High	y	y	0	1	0		60.000	60	163.0	1.63	23	00	0	7	0	c	own bed	own bed	19	19	30	30	nothing	sweet	nothing	nothing	0	0								North	No
898	9	510	2015-05-20	2007-05-07	3500	f	1984	Works at home	Middle	1985	Employed	Middle	y	y	1	0	1		22.500	22.5	121.0	1.21	21	00	0	7	15	y	own bed	own bed	17	17	15	15	milk	sweet	nothing	nothing	0	0								North	No
899	4	523	2015-05-20	2005-09-12	2100	f	1976	Works at home	Middle	1973	Employed	Middle	y	y	2	0	0		26.000	26	126.0	1.26	22	00	0	6	30	y	own bed	own bed	19	19	30	30	nothing	nothing	nothing	nothing	0	0								South	No
900	4	523	2015-05-20	2008-09-19	3060	m	1985	Works at home	Middle	1981	Employed	Middle	y	y	0	2	5		23.000	23	116.0	1.16	21	00	0	7	0	c	own bed	own bed	19	19	30	30	milk	nothing	nothing	nothing	0	0								South	Yes
901	9	503	2015-05-20	2014-02-12	3700	m	1975	Employed	University	1979	Employed	High	y	y	0	0	0		11.300	11.3	81.0		21	45	45	7	30	n	parents' bed	own bed	19	19	30	30	nothing	nothing	nothing	nothing	1	1.5								North	Yes
902	9	518	2015-05-20	2007-12-21	4020	m	1977	Works at home	Middle	1983	Employed	High	y	n	0	1	1		24.300	24.3	129.5	1.295	21	00	0	7	0	y	parents' bed	own bed	19	19	30	30	nothing	nothing	nothing	nothing	0	0								North	Yes
903	9	521	2015-05-20	2005-03-04	2720	f	1974	Employed	High	1972	Employed	High	y	y	0	1	0		31.000	31	138.0	1.38	22	15	15	7	15	c	own bed	own bed	19	19	15	15	nothing	nothing	nothing	nothing	0	0								North	No
904	9	522	2015-05-20	2012-04-07	4060	m	1980	Employed	University	1978	Employed	High	y	y	0	0	0		13.500	13.5	93.5	0.935	23	15	15	7	45	y	own bed	own bed	19	19	30	30	nothing	nothing	nothing	nothing	2	0								North	Yes
905	9	518	2015-05-20	2003-09-11	2650	m	1973	Employed	University	1961	Employed	University	y	y	0	1	0		37.000	37	140.0	1.4	22	00	0	7	0	y	other room	own bed	19	19	30	30	nothing	nothing	nothing	nothing	1	0								North	Yes
906	9	514	2015-05-20	2009-04-17	3370	f	1978	Employed	High	1975	Employed	University	y	y	1	0	0		27.500	27.5	121.0	1.21	21	15	15	7	0	c	parents' bed	own bed	20	20	0	0	nothing	nothing	nothing	nothing	0	0								North	No
907	4	491	2015-05-20	2013-11-25	3680	f	1976	Works at home	High	1974	Employed	University	y	y	2	0	0		12.200	12.2	88.0		23	00	0	9	15	n	parents' bed	own bed	19	19	30	30	nothing	sweet	nothing	nothing	0	1.75								South	No
908	15	504	2015-05-20	2004-10-09	3000	m	1975	Employed	University	1973	Employed	High	y	y	0	1	0		35.000	35	147.0	1.47	22	00	0	7	0	c	parents' bed	parents' bed	20	20	0	0	nothing	nothing	nothing	nothing	2	0								South	Yes
909	9	518	2015-05-20	2010-04-15	2700	f	1973	Employed	University	1961	Employed	University	y	y	1	0	0		18.000	18	106.0	1.06	21	15	15	8	0	y	own bed	own bed	19	19	30	30	nothing	nothing	nothing	nothing	0	0								North	No
910	15	504	2015-05-20	2009-05-14	3000	m	1975	Employed	University	1973	Employed	High	y	y	1	0	0		21.000	21	123.0	1.23	21	30	30	7	0	c	parents' bed	own bed	20	20	0	0	nothing	nothing	nothing	nothing	0	0								South	Yes
911	4	491	2015-05-20	2009-10-05	3150	m	1977	Employed	University	1976	Employed	University	y	y	0	1	1		26.500	26.5	116.0	1.16	22	30	30	7	30	y	parents' bed	own bed	20	20	30	30	nothing	sweet	nothing		0	0								South	Yes
912	9	513	2015-05-20	2006-08-17	3500	m	1976	Employed	High	1978	Employed	High	y	y	0	2	0		30.700	30.7	137.0	1.37	21	15	15	6	30	c	own bed	own bed	19	19	0	0	nothing	nothing	nothing	nothing	0	0								North	Yes
913	9	513	2015-05-20	2009-04-24	3550	m	1976	Employed	High	1978	Employed	High	y	y	1	1	0		21.500	21.5	122.0	1.22	21	15	15	6	30	c	own bed	own bed	19	19	0	0	nothing	nothing	nothing	nothing	0	0								North	Yes
914	9	558	2015-05-20	2013-01-26	3180	m	1979	Employed	High	1979	Employed	High	y	y	1	0	4		14.800	14.8	94.5	0.945	21	00	0	7	0	c	own bed	own bed	20	20	0	0	milk	nothing	nothing	nothing	1	1								North	Yes
915	9	485	2015-05-20	2014-04-15	3060	m	1980	Employed	High	1978	Employed	High	y	y	0	0	0		9.600	9.6	78.0		20	45	45	6	15	y	own bed	own bed	19	19	0	0	nothing	nothing	nothing	nothing	2	1								North	Yes
916	9	558	2015-05-20	2012-08-11	3830	f	1980	Employed	High	1975	Employed	Middle	y	y	1	0	4		15.000	15	96.0	0.96	21	30	30	7	30	c	own bed	own bed	19	19	30	30	milk	nothing	nothing	nothing	1	1								North	No
917	9	513	2015-05-20	2005-04-08	3705	m	1976	Employed	High	1970	Employed	High	y	y	0	0	0		29.200	29.2	144.0	1.44	21	30	30	6	45	y	own bed	own bed	18	18	45	45	nothing	salted & sweet	nothing	nothing	1	0								North	Yes
918	9	485	2015-05-20	2010-01-21	3350	m	1980	Employed	University	1979	Employed	High	y	y	0	0	0		20.700	20.7	113.0	1.13	21	45	45	6	0	y	parents' bed	own bed	20	20	0	0	nothing	fruit	nothing	nothing	1	0								North	Yes
919	9	485	2015-05-20	2006-06-08	3400	f	1970	Employed	Middle	1970	Employed	High	y	y	2	0	0		30.500	30.5	133.0	1.33	21	30	30	7	30	c	own bed	own bed	20	20	0	0	nothing	nothing	nothing	nothing	1	0								North	No
920	20	489	2015-05-20	2007-04-15	3720	m	1976	Employed	University	1976	Employed	University	y	y	0	0	0		22.000	22	119.0	1.19	21	00	0	7	30	y	own bed	own bed	20	20	0	0	nothing	nothing	nothing	nothing	0	0								North	Yes
921	20	489	2015-05-20	2009-07-12	3830	m	1981	Unemployed	University	1975	Employed	High	y	y	0	2	0		27.800	27.8	120.5	1.205	22	00	0	8	0	c	own bed	own bed	20	20	0	0	nothing	nothing	nothing	nothing	0	0								North	Yes
923	9	513	2015-05-20	2009-07-09	2470	m	1975	Employed	High	1972	Employed	High	y	y	1	0	0		20.100	20.1	115.0	1.15	21	30	30	7	15	c	own bed	own bed	20	20	0	0	nothing	nothing	nothing	nothing	1	0								North	Yes
924	9	513	2015-05-20	2009-07-09	2610	f	1975	Employed	High	1972	Employed	High	y	y	1	0	0		20.600	20.6	115.0	1.15	21	30	30	7	30	c	own bed	own bed	20	20	0	0	nothing	nothing	nothing	nothing	0	0								North	No
925	9	553	2015-05-21	2011-01-27	2170	m	1981	Employed	High	1977	Employed	University	y	y	0	1	0		15.300	15.3	101.0	1.01	20	30	30	6	0	y	other room	own bed	19	19	30	30	nothing	nothing	nothing	nothing	1	0								North	Yes
926	9	522	2015-05-21	2010-05-09	3250	f	1980	Employed	Middle	1975	Employed	High	y	y	0	1	0		17.100	17.1	106.8	1.068	21	45	45	7	0	c	own bed	own bed	20	20	0	0	nothing	nothing	nothing	nothing	0	0								North	No
927	9	507	2015-05-21	2011-08-26	2780	f	1974	Employed	High	1971	Employed	High	y	y	0	0	0		14.000	14	101.0	1.01	22	00	0	8	0	y	own bed	own bed	19	19	30	30	milk	nothing	nothing	nothing	0	1								North	No
928	9	521	2015-05-21	2010-01-11	2800	m	1993	Unemployed	Middle	1989	Employed	Middle	y	n	0	0	2		18.000	18	111.0	1.11	21	00	0	7	45	n	other room	own bed	19	19	0	0	nothing	nothing	nothing	nothing	0	1								North	Yes
929	15	508	2015-05-21	2008-08-11	3200	m	1985	Employed	Middle	1983	Employed	Middle	y	y	0	1	0		24.000	24	122.0	1.22	22	15	15	7	0	c	own bed	own bed	19	19	45	45	nothing	nothing	nothing	nothing	0	0								South	Yes
930	9	512	2015-05-21	2013-06-06	3350	m	1983	Unemployed	Middle	1979	Employed	High	y	n	0	0	0		11.500	11.5	94.0		22	00	0	9	0	n	own bed	own bed	19	19	30	30	nothing	nothing	nothing	nothing	0	1.5								North	Yes
931	9	525	2015-05-20	2010-04-17	3070	m	1979	Employed	High	1981	Employed	Middle	y	y	0	1	0		24.000	24	111.0	1.11	22	00	0	8	0	c	own bed	own bed	19	19	30	30	nothing	nothing	nothing	nothing	0	0								North	Yes
932	15	508	2015-05-21	2008-09-12	3230	f	1974	Unemployed	University	1972	Employed	University	y	y	1	0	0		21.000	21	116.0	1.16	22	30	30	7	15	c	own bed	own bed	20	20	0	0	nothing	nothing	nothing	nothing	0	1								South	No
933	9	558	2015-05-21	2014-02-06	3550	f	1984	Unemployed	Middle	1980	Employed	Middle	y	y	0	0	4		12.000	12	82.5		22	00	0	8	30	n	parents' bed	own bed	19	19	30	30	milk	nothing	nothing	nothing	1	1	y							North	No
934	9	558	2015-05-21	2005-05-30	2830	m	1977	Employed	High	1976	Employed	High	y	y	0	1	0		25.600	25.6	132.5	1.325	22	30	30	7	0	y	own bed	own bed	20	20	0	0	nothing	sweet	nothing	nothing	0	0								North	Yes
935	9	558	2015-05-21	2014-02-14	3240	f	1980	Works at home	Middle	1980	Employed	Elementary	y	y	1	0	4		9.600	9.6	77.5		21	30	30	8	0	c	other room	own bed	19	19	0	0	milk	nothing	nothing	nothing	1	1								North	No
936	9	512	2015-05-21	2011-03-04	2380	f	1973	Employed	High	1964	Employed	University	y	y	0	0	1		14.800	14.8	103.3	1.033	21	30	30	8	0	y	own bed	own bed	19	19	0	0	milk	sweet	nothing	nothing	0	1.5								North	No
937	9	560	2015-05-21	2009-02-03	3120	m	1970	Employed	High	1973	Employed	High	y	y	0	0	0		18.000	18	109.0	1.09	22	30	30	7	15	y	other room	own bed	20	20	0	0	nothing	nothing	nothing	nothing	0	0								North	Yes
938	9	511	2015-05-21	2006-05-19	3330	m	1972	Works at home	University	1966	Employed	University	y	y	0	1	0		24.000	24	131.0	1.31	22	00	0	7	15	y	own bed	own bed	19	19	45	45	nothing	nothing	nothing	nothing	0	0								North	Yes
939	17	534	2015-05-21	2008-08-20	3875	f	1970	Works at home	Middle	1970	Employed	High	y	y	1	0	0		24.000	24	124.0	1.24	21	00	0	7	0	y	own bed	own bed	19	19	15	15	nothing	nothing	nothing	nothing	0	0								North	No
940	15	508	2015-05-21	2008-02-14	3650	f	1969	Employed	University	1974	Employed	High	y	y	0	0	0		22.500	22.5	116.0	1.16	22	00	0	7	0	y	own bed	own bed	20	20	30	30	nothing	nothing	nothing	nothing	3	2								South	No
941	17	534	2015-05-21	2014-02-02	2540	m	1983	Employed	University	1978	Employed	High	y	y	0	0	0		9.500	9.5	79.0		21	00	0	7	30	y	parents' bed	parents' bed	19	19	0	0	milk	nothing	nothing	nothing	2	3								North	Yes
942	9	512	2015-05-21	2012-12-13	4060	f	1982	Employed	University	1980	Employed	High	y	y	0	0	0		13.400	13.4	96.0	0.96	21	30	30	6	45	n	own bed	own bed	19	19	45	45	nothing	nothing	nothing	nothing	1	2								North	No
943	9	525	2015-05-21	2011-09-01	3650	f	1989	Works at home	Middle	1985	Employed	Middle	y	y	0	0	0		14.000	14	97.0	0.97	22	30	30	7	30	y	parents' bed	parents' bed	19	19	30	30	nothing	sweet	nothing	nothing	1	1.5								North	No
944	9	513	2015-05-21	2006-03-11	3250	m	1979	Employed	High	1978	Employed	High	y	y	0	1	0		20.500	20.5	111.0	1.11	22	15	15	7	15	c	other room	own bed	19	19	30	30	nothing	nothing	nothing	nothing	0	0								North	Yes
945	9	513	2015-05-21	2010-02-28	3450	m	1978	Employed	High	1979	Employed	High	y	y	1	0	0		20.500	20.5	111.0	1.11	21	15	15	7	30	c	other room	own bed	19	19	30	30	nothing	nothing	nothing	nothing	1	0.5								North	Yes
946	9	525	2015-05-21	2010-07-14	3200	m	1970	Employed	High	1971	Employed	High	y	y	0	0	0		18.800	18.8	108.0	1.08	22	00	0	8	0	y	own bed	own bed	20	20	15	15	milk	nothing	nothing	nothing	2	0								North	Yes
947	9	560	2015-05-21	2014-01-21	2800	f	1980	Employed	High	1978	Employed	University	y	y	0	0	0		10.200	10.2	82.0		21	15	15	6	30	y	own bed	own bed	19	19	0	0	milk	nothing	nothing	nothing	1	1.5								North	No
948	9	525	2015-05-21	2008-10-01	2340	f	1975	Works at home	High	1972	Employed	Middle	y	y	1	0	0		25.300	25.3	118.0	1.18	22	00	0	7	15	c	other room	other room	20	20	15	15	nothing	nothing	nothing	nothing	2	0								North	No
950	15	508	2015-05-21	2002-10-10	2400	m	1973	Employed	Middle	1970	Employed	Middle	y	y	2	1	0		45.500	45.5	157.5	1.575	23	30	30	7	15	c	own bed	own bed	21	21	0	0	nothing	nothing	nothing	nothing	0	0.75								South	Yes
951	20	565	2015-05-22	2013-09-28	3100	m	1981	Employed	High	1983	Employed	High	y	y	0	0	0		11.000	11	80.0		21	30	30	8	30	y	own bed	own bed	19	19	45	45	milk	nothing	nothing	nothing	1	2								North	Yes
952	17	534	2015-05-22	2010-10-19	3140	f	1969	Employed	High	1969	Employed	University	y	y	2	0	0		17.500	17.5	110.0	1.1	20	30	30	7	30	y	parents' bed	own bed	19	19	15	15	milk	nothing	nothing	nothing	0	0								North	No
954	20	565	2015-05-22	2002-07-31	3820	m	1973	Works at home	High	1968	Employed	Middle	y	y	0	1	0		59.000	59	163.5	1.635	21	45	45	6	45	c	own bed	own bed	19	19	30	30	nothing	nothing	nothing	nothing	0	0								North	Yes
956	9	511	2015-05-22	2011-12-12	3360	m	1973	Employed	Middle	1973	Employed	Middle	y	y	2	0	0		13.200	13.2	97.5	0.975	22	30	30	6	30	n	parents' bed	parents' bed	20	20	0	0	milk	nothing	nothing	nothing	0	2								North	Yes
957	9	512	2015-05-22	2013-01-16	3550	m	1981	Employed	High	1980	Employed	High	y	y	0	1	0		13.700	13.7	90.0	0.9	22	30	30	6	30	y	own bed	own bed	19	19	0	0	nothing	nothing	nothing	nothing	1	2								North	Yes
958	15	497	2015-05-20	2009-09-09	1890	m	1979	Employed	Middle	1976	Employed	Middle	y	y	1	1	0		20.500	20.5	112.5	1.125	22	00	0	8	30	y	own bed	own bed	20	20	0	0	nothing	nothing	nothing	nothing	0	2								South	Yes
959	15	497	2015-05-20	2009-09-09	1900	f	1979	Employed	Middle	1976	Employed	Middle	y	y	1	1	0		20.000	20	111.5	1.115	22	00	0	8	30	c	own bed	own bed	20	20	0	0	nothing	nothing	nothing	nothing	0	0								South	No
960	15	508	2015-05-22	2006-08-02	3070	m	1974	Employed	University	1974	Employed	University	y	y	0	1	0		24.500	24.5	130.0	1.3	22	00	0	7	30	c	own bed	own bed	20	20	0	0	nothing	nothing	nothing	nothing	1	0								South	Yes
961	15	497	2015-05-21	2006-07-16	3400	m	1986	Unemployed	Middle	1986	Employed	Middle	y	y	0	1	0		25.000	25	130.0	1.3	22	00	0	7	0	c	own bed	own bed	20	20	0	0	nothing	nothing	nothing	nothing	1	0								South	Yes
962	15	508	2015-05-22	2014-03-16	3500	m	1986	Employed	Middle	1982	Employed	High	y	y	1	0	0		11.900	11.9	80.5		23	30	30	8	0	c	own bed	own bed	21	21	0	0	nothing	nothing	nothing	nothing	4	3								South	Yes
963	15	497	2015-05-21	2011-04-20	3800	m	1972	Works at home	High	1966	Employed	High	y	y	2	0	0		26.000	26	117.0	1.17	22	00	0	7	30	c	own bed	own bed	20	20	30	30	nothing	nothing	nothing	nothing	1	0								South	Yes
965	15	497	2015-05-21	2008-08-21	2750	m	1981	Unemployed	High	1980	Employed	High	y	y	1	0	0		20.000	20	117.5	1.175	21	30	30	7	0	c	own bed	own bed	20	20	0	0	nothing	nothing	nothing	nothing	1	0								South	Yes
966	15	508	2015-05-22	2010-05-13	3090	m	1974	Employed	University	1974	Employed	University	y	y	1	0	0		16.800	16.8	107.5	1.075	22	30	30	7	30	c	own bed	own bed	20	20	0	0	nothing	nothing	nothing	nothing	0	1.5								South	Yes
967	15	508	2015-05-22	2009-08-22	3390	m	1986	Employed	Middle	1982	Employed	High	y	y	0	1	0		25.000	25	119.0	1.19	22	00	0	7	30	c	own bed	own bed	20	20	0	0	nothing	nothing	nothing	nothing	0	0								South	Yes
969	9	559	2015-05-22	2010-02-04	3550	f	1969	Employed	University	1966	Employed	Middle	y	n	0	0	0		27.000	27	111.0	1.11	22	00	0	7	30	n	own bed	own bed	19	19	0	0	milk	nothing	nothing	nothing	1	0								North	No
970	9	542	2015-05-22	2014-03-19	3570	f	1982	Works at home	High	1981	Employed	High	y	y	1	0	0		8.600	8.6	72.0		20	30	30	7	0	c	own bed	own bed	19	19	0	0	milk	nothing	nothing	nothing	1	3								North	No
971	9	518	2015-05-22	2011-08-23	3380	m	1976	Employed	High	1976	Employed	Middle	y	y	1	0	0		14.500	14.5	101.0	1.01	21	30	30	7	30	n	parents' bed	own bed	20	20	0	0	nothing	nothing	nothing	nothing	0	1.5								North	Yes
973	9	518	2015-05-22	2004-03-17	3300	m	1964	Employed	University	1964	Employed	University	y	y	3	0	0		29.000	29	140.0	1.4	22	00	0	7	45	y	own bed	own bed	19	19	30	30	nothing	salted	nothing	nothing	0	0								North	Yes
974	9	558	2015-05-22	2002-07-05	3200	m	1975	Employed	High	1974	Employed	High	y	y	1	0	3		51.400	51.4	158.0	1.58	22	30	30	7	0	c	own bed	own bed	20	20	0	0	milk	sweet	nothing	nothing	0	0								North	Yes
975	9	558	2015-05-22	2005-06-28	2760	m	1968	Employed	High	1967	Employed	High	y	y	0	0	4		32.300	32.3	146.5	1.465	22	00	0	7	15	y	own bed	own bed	20	20	15	15	nothing	nothing	nothing	nothing	0	0								North	Yes
976	15	519	2015-05-22	2012-05-07	2900	f	1988	Works at home	Middle	1984	Employed	High	y	y	1	0	0		15.000	15	98.0	0.98	21	30	30	8	0	c	parents' bed	parents' bed	20	20	0	0	juice	nothing	nothing	nothing	1	1.5		y						South	No
977	15	519	2015-05-22	2007-05-23	3100	f	1988	Works at home	Middle	1984	Employed	High	y	y	0	1	0		24.000	24	124.0	1.24	22	30	30	7	0	c	own bed	own bed	20	20	0	0	nothing	nothing	nothing	nothing	0	0								South	No
979	15	519	2015-05-22	2004-08-28	3650	m	1985	Works at home	Middle	1981	Unemployed	Middle	y	y	0	1	0		58.000	58	152.0	1.52	23	30	30	7	0	c	own bed	own bed	20	20	30	30	nothing	salted	nothing	nothing	0	0								South	Yes
980	15	519	2015-05-22	2009-05-06	3400	m	1985	Works at home	Middle	1979	Unemployed	Middle	y	y	1	0	0		26.000	26	138.0	1.38	21	30	30	7	0	c	own bed	own bed	20	20	30	30	nothing	nothing	nothing	nothing	0	0								South	Yes
981	4	564	2015-04-30	2011-02-01	3400	f	1971	Employed	High	1974	Other	High	y	y	1	1	0		18.900	18.9	103.5	1.035	22	00	0	8	0	c	other room	own bed	19	19	30	30	nothing	nothing	nothing	nothing	0	0								South	No
983	4	564	2015-04-30	2009-09-05	3050	f	1981	Unemployed	High	1975	Other	High	y	y	0	0	0		19.900	19.9	113.5	1.135	21	45	45	7	30	n	other room	parents' bed	20	20	0	0	nothing	fruit	nothing	nothing	0	0								South	No
984	9	522	2015-05-22	2012-05-09	3730	f	1982	Employed	Middle	1980	Employed	High	y	y	0	0	0		12.500	12.5	92.0	0.92	21	45	45	8	30	y	other room	own bed	20	20	30	30	other	sweet	nothing	nothing	0	2								North	No
985	20	499	2015-05-22	2004-08-06	3100	f	1975	Employed	Middle	1970	Employed	Middle	y	n	0	0	0		45.000	45	141.0	1.41	22	15	15	7	15	y	parents' bed	parents' bed					nothing	fruit	nothing	nothing	0	0								North	No
986	20	565	2015-05-26	2014-05-08	3030	f	1982	Employed	High	1980	Employed	University	y	y	0	0	0		8.900	8.9	72.0		22	00	0	6	15	y	other room	own bed	20	20	0	0	nothing	nothing	nothing	nothing	1	2								North	No
987	20	574	2015-05-26	2011-02-24	2800	f	1979	Works at home	Middle	1962	Employed	Middle	y	y	2	0	0		22.000	22	112.5	1.125	21	15	15	8	30	y	own bed	own bed	19	19	0	0	milk	nothing	milk	nothing	1	0								North	No
988	9	507	2015-05-26	2014-01-02	3050	m	1982	Employed	High	1979	Employed	High	y	y	0	0	0		10.600	10.6	80.5		22	45	45	8	0	n	parents' bed	parents' bed	19	19	45	45	nothing	nothing	nothing	nothing	2	2								North	Yes
989	9	507	2015-05-26	2014-01-14	2600	f	1977	Employed	High	1979	Employed	High	y	y	0	0	0		9.000	9	77.0		22	30	30	7	30	n	parents' bed	own bed	19	19	15	15	nothing	nothing	nothing	nothing	1	2								North	No
990	17	534	2015-05-26	2012-05-18	4570	m	1980	Employed	High	1973	Employed	High	y	y	0	0	0		17.800	17.8	105.0	1.05	22	15	15	7	15	y	own bed	own bed	19	19	45	45	nothing	nothing	nothing	nothing	0	2								North	Yes
991	17	534	2015-05-22	2012-12-04	3680	m	1976	Employed	University	1975	Employed	University	y	y	0	1	0		15.000	15	100.0	1	21	15	15	7	0	y	own bed	own bed	20	20	0	0	nothing	nothing	nothing	nothing	0	0								North	Yes
992	9	510	2015-05-26	2012-10-01	3380	f	1975	Employed	High	1975	Unemployed	Middle	y	y	0	1	0		15.500	15.5	95.5	0.955	23	15	15	9	0	n	own bed	own bed	19	19	45	45	milk	other	nothing	nothing	2	1.5								North	No
993	17	534	2015-05-26	2012-01-25	3200	m	1979	Employed	Middle	1965	Employed	High	y	y	0	0	0		16.000	16	100.0	1	21	00	0	7	0	y	own bed	own bed	19	19	30	30	milk	nothing	milk	nothing	3	2								North	Yes
994	9	525	2015-05-26	2014-04-13	3320	f	1981	Employed	High	1981	Employed	High	y	y	0	0	0		8.700	8.7	78.0		22	30	30	8	15	y	other room	parents' bed	19	19	15	15	milk	nothing	milk	nothing	4	1								North	No
995	9	507	2015-05-26	2013-02-12	3650	f	1975	Employed	Middle	1971	Unemployed	High	y	n	2	0	0		11.500	11.5	85.0	0.85	22	00	0	9	0	n	parents' bed	parents' bed	20	20	0	0	nothing	nothing	nothing	nothing	1	1.5								North	No
996	15	508	2015-05-26	2014-05-05	3650	m	1976	Employed	High	1974	Employed	Middle	y	y	0	0	0		11.700	11.7	76.0		23	00	0	8	0	n	own bed	own bed	20	20	30	30	nothing	nothing	nothing	nothing	0	4								South	Yes
997	15	508	2015-05-26	2009-06-10	3300	f	1977	Works at home	University	1971	Employed	Middle	y	y	0	1	0		21.000	21	114.0	1.14	23	00	0	8	0	y	own bed	own bed	20	20	0	0	nothing	nothing	nothing	nothing	0	0								South	No
998	15	508	2015-05-26	2011-12-07	3300	f	1972	Works at home	Middle	1968	Employed	Middle	y	y	1	0	0		14.000	14	92.5	0.925	22	30	30	8	30	n	own bed	own bed	20	20	0	0	nothing	nothing	nothing	nothing	2	2								South	No
1001	9	507	2015-05-26	2010-08-16	2500	f	1976	Works at home	Middle	1966	Employed	High	y	y	0	2	0		17.000	17	111.0	1.11	21	30	30	8	0	n	own bed	own bed	19	19	45	45	nothing	nothing	nothing	nothing	1	0								North	No
1002	9	515	2015-05-26	2014-04-24	4500	m	1979	Employed	University	1978	Employed	High	y	y	0	0	0		10.100	10.1	77.0		20	45	45	7	0	y	other room	own bed	19	19	0	0	milk	nothing	nothing	nothing	1	2								North	Yes
1004	9	559	2015-05-26	2007-05-04	4450	m	1985	Employed	High	1980	Employed	Middle	y	y	0	1	0		41.000	41	132.0	1.32	21	30	30	7	45	c	own bed	own bed	20	20	0	0	nothing	nothing	nothing	nothing	2	0								North	Yes
1005	20	575	2015-05-26	2011-04-21	3180	f	1979	Employed	High	1975	Employed	High	y	y	0	0	0		12.400	12.4	84.5	0.845	21	00	0	8	30	y	own bed	own bed	19	19	30	30	milk	nothing	milk	nothing	3	0								North	No
1006	15	508	2015-05-26	2011-06-20	2920	m	1979	Employed	High	1975	Employed	High	y	y	0	0	0		12.400	12.4	84.5	0.845	22	00	0	8	30	y	own bed	own bed	19	19	30	30	milk	nothing	milk	nothing	3	0								South	Yes
1007	20	575	2015-05-26	2011-04-21	3180	f	1977	Employed	High	1976	Employed	High	y	y	1	0	0		16.000	16	100.0	1	21	00	0	7	0	c	outside home	outside home	19	19	15	15	nothing	nothing	nothing	nothing	0	1								North	No
1008	20	575	2015-05-26	2010-09-27	3050	f	1981	Employed	High	1978	Employed	High	y	y	0	1	0		17.000	17	101.0	1.01	20	45	45	7	0	c	own bed	own bed	18	18	45	45	nothing	nothing	nothing	nothing	1	0								North	No
1009	9	558	2015-05-26	2014-02-22	3440	m	1975	Employed	High	1973	Employed	High	y	y	0	0	4		10.400	10.4	79.0		21	00	0	7	30	y	own bed	own bed	19	19	0	0	milk	nothing	nothing	nothing	0	1.25								North	Yes
1010	9	559	2015-05-26	2010-05-25	3370	f	1975	Works at home	High	1972	Employed	High	y	y	0	1	0		20.000	20	102.0	1.02	21	00	0	8	30	n	own bed	own bed	20	20	0	0	milk	nothing	nothing	nothing	0	0.5								North	No
1011	9	485	2015-05-26	2013-01-27	3130	f	1984	Employed	High	1979	Employed	University	y	y	0	0	0		13.500	13.5	95.5	0.955	23	30	30	6	15	y	parents' bed	parents' bed	19	19	45	45	juice	nothing	nothing	nothing	4	1	y							North	No
1012	9	559	2015-05-26	2011-09-03	3480	f	1974	Employed	University	1969	Employed	University	y	y	0	1	0		19.000	19	102.0	1.02	21	30	30	7	0	c	own bed	own bed	20	20	30	30	nothing	nothing	nothing	nothing	2	1								North	No
1013	9	559	2015-05-26	2010-11-26	3120	f	1988	Works at home	Middle	1982	Employed	High	y	y	0	1	0		20.000	20	104.0	1.04	22	00	0	8	0	y	own bed	own bed	20	20	30	30	nothing	nothing	nothing	nothing	1	0								North	No
1014	9	512	2015-05-26	2011-01-06	3325	f	1983	Employed	University	1971	Employed	University	y	y	0	1	0		23.200	23.2	108.0	1.08	22	00	0	7	30	y	own bed	own bed	19	19	30	30	nothing	sweet	nothing	nothing	0	0								North	No
1015	9	559	2015-05-26	2010-12-11	3800	f	1974	Employed	High	1975	Employed	University	y	y	0	1	0		18.000	18	100.0	1	21	30	30	7	30	y	own bed	own bed	20	20	0	0	nothing	nothing	nothing	nothing	1	0								North	No
1016	9	484	2015-05-26	2001-10-23	3010	m	1970	Employed	Middle	1968	Employed	Middle	y	n	0	1	0		44.500	44.5	161.0	1.61	24	00	0	6	45	c	own bed	own bed	20	20	0	0	nothing	nothing	nothing	nothing	1	0								North	Yes
1017	9	512	2015-05-26	2014-02-24	3150	m	1982	Works at home	University	1978	Employed	Middle	y	y	0	0	0		11.500	11.5	78.0		22	00	0	8	0	n	own bed	own bed	19	19	15	15	milk	nothing	nothing	nothing	1	2								North	Yes
1018	9	558	2015-05-26	2013-11-05	2980	f	1978	Employed	Middle	1976	Employed	Middle	y	y	2	0	4		10.400	10.4	77.5		22	00	0	7	30	c	other room	own bed	19	19	30	30	milk	nothing	milk	nothing	2	0.75								North	No
1019	9	558	2015-05-26	2010-06-01	3930	m	1977	Employed	University	1975	Employed	University	y	y	2	0	4		22.000	22	110.0	1.1	21	30	30	7	30	c	own bed	own bed	19	19	30	30	nothing	nothing	nothing	nothing	0	0								North	Yes
1020	16	548	2015-05-26	2009-05-15	2780	m	1970	Employed	Middle	1971	Employed	Middle	y	y	0	0	0		24.000	24	123.0	1.23	22	00	0	7	45	y	own bed	own bed	20	20	30	30	nothing	nothing	nothing	nothing	1	0								Center	Yes
1021	9	560	2015-05-26	2009-04-22	3100	m	1973	Employed	University	1974	Employed	University	y	y	0	1	0		21.000	21	113.0	1.13	21	00	0	7	0	c	own bed	own bed	18	18	45	45	nothing	nothing	nothing	nothing	1	0								North	Yes
1022	9	560	2015-05-26	2011-06-18	2900	m	1973	Employed	University	1974	Employed	University	y	y	1	0	0		14.800	14.8	99.5	0.995	21	30	30	7	0	c	own bed	own bed	18	18	45	45	nothing	sweet	nothing	nothing	0	1.25								North	Yes
1023	9	554	2015-05-26	2009-06-23	2780	f	1972	Works at home	High	1975	Employed	University	y	y	1	1	0		18.900	18.9	116.0	1.16	22	15	15	8	0	c	parents' bed	own bed	19	19	0	0	nothing	nothing	nothing	nothing	0	0								North	No
1024	9	503	2015-05-26	2011-09-15	2920	f	1984	Employed	University	1977	Employed	High	y	y	0	1	0		15.500	15.5	97.7	0.977	20	45	45	7	0	c	own bed	own bed	19	19	30	30	nothing	nothing	nothing	nothing	0	0								North	No
1027	9	503	2015-05-26	2009-05-30	3070	f	1992	Employed	Middle				y	n	0	0	1	n	14.500	14.5	104.0	1.04	21	30	30	7	0	n	parents' bed	parents' bed	19	19	0	0	nothing	nothing	nothing	nothing	2	0								North	No
1029	9	503	2015-05-26	2010-05-03	3490	m	1990	Unemployed	High	1990	Other	High	y	n	0	0	3		26.000	26	114.2	1.142	22	00	0	6	0	n	other room	own bed	20	20	0	0	nothing	nothing	nothing	nothing	0	2.5								North	Yes
1030	9	513	2015-05-26	2010-03-27	2870	f	1976	Employed	University	1976	Employed	High	y	y	0	0	0		17.000	17	106.0	1.06	21	15	15	7	0	y	parents' bed	parents' bed	19	19	30	30	nothing	nothing	nothing	nothing	2	0								North	No
1031	9	554	2015-05-26	2008-11-22	2670	f	1978	Employed	Middle	1977	Employed	High	y	y	0	1	0		18.600	18.6	112.0	1.12	21	30	30	7	15	c	own bed	own bed	19	19	0	0	juice	nothing	nothing	nothing	1	0								North	No
1032	9	513	2015-05-26	2004-05-22	3000	f	1974	Employed	Middle	1962	Employed	Middle	y	y	1	1	0		39.000	39	147.0	1.47	23	00	0	7	30	c	own bed	own bed	20	20	0	0	juice	sweet	nothing	nothing	0	0								North	No
1033	9	513	2015-05-26	2009-07-08	2600	f	1974	Employed	Middle	1962	Employed	Middle	y	y	2	0	0		21.400	21.4	114.5	1.145	22	45	45	7	45	c	own bed	own bed	20	20	0	0	milk	sweet	nothing	nothing	0	0								North	No
1034	9	513	2015-05-26	2002-01-02	3200	f	1976	Works at home	High	1966	Employed	High	y	y	0	1	0		38.200	38.2	150.0	1.5	23	00	0	7	0	y	own bed	own bed	19	19	30	30	juice	nothing	nothing	nothing	0	0								North	No
1035	15	497	2015-05-26	2012-04-21	2530	m	1987	Unemployed	High	1984	Employed	Middle	y	y	0	0	0		12.900	12.9	96.0	0.96	23	00	0	8	30	y	other room	other room	20	20	30	30	milk	nothing	nothing	nothing	0	2.5								South	Yes
1036	9	554	2015-05-27	2008-01-22	3160	m	1975	Works at home	High	1968	Employed	High	y	y	1	1	0		24.600	24.6	126.0	1.26	23	00	0	7	30	c	other room	own bed	20	20	15	15	nothing	fruit	nothing	nothing	0	0								North	Yes
1037	20	574	2015-05-27	2013-09-01	3150	m	1983	Works at home	High	1982	Employed	High	y	y	1	0	0		10.800	10.8	81.5		21	30	30	8	0	c	other room	own bed	19	19	30	30	milk	sweet	nothing	nothing	1	2								North	Yes
1039	15	508	2015-05-27	2011-06-20	2920	m	1977	Employed	High	1971	Employed	High	y	y	0	0	0		16.000	16	103.5	1.035	24	00	0	7	0	n	own bed	own bed	22	22	0	0	nothing	nothing	nothing	nothing	0	3								South	Yes
1040	9	546	2015-05-27	2014-01-03	3560	f	1978	Unemployed	University	1981	Employed	University	y	y	1	0	0		9.500	9.5	77.5		22	30	30	7	30	n	parents' bed	parents' bed	19	19	30	30	nothing	fruit	nothing	nothing	0	2								North	No
1041	9	559	2015-05-26	2002-08-30	2850	m	1968	Employed	High	1959	Employed	Middle	y	y	1	0	0		34.000	34	130.0	1.3	23	30	30	7	0	c	own bed	own bed	20	20	30	30	other	sweet	nothing	nothing	0	0								North	Yes
1042	9	507	2015-05-27	2014-01-19	3438	m	1992	Unemployed	High	1992	Employed	Middle	y	n	0	0	2		13.000	13	81.0		22	15	15	8	30	n	other room	own bed	18	18	45	45	juice	sweet	juice	nothing	4	2								North	Yes
1044	15	508	2015-05-27	2008-06-14	3720	m	1980	Employed	High	1976	Employed	Middle	y	y	0	1	0		22.500	22.5	123.0	1.23	22	30	30	7	15	y	own bed	own bed	20	20	15	15	nothing	nothing	nothing	nothing	0	0.75								South	Yes
1045	17	534	2015-05-27	2006-01-08	3380	m	1979	Employed	High	1970	Employed	Middle	y	n	1	2	0		33.500	33.5	143.0	1.43	22	00	0	7	0	c	own bed	own bed	19	19	45	45	juice	nothing	nothing	nothing	0	0								North	Yes
1046	17	534	2015-05-27	2007-05-17	2140	f	1964	Employed	High	1965	Employed	Middle	y	y	1	0	0		25.000	25	128.0	1.28	20	45	45	7	0	y	own bed	own bed	19	19	15	15	nothing	nothing	nothing	nothing	0	0								North	No
1047	9	507	2015-05-27	2011-10-20	4350	m	1975	Employed	High	1971	Employed	High	y	y	0	0	0		16.500	16.5	102.0	1.02	23	30	30	8	45	y	parents' bed	parents' bed	19	19	0	0	nothing	nothing	nothing	nothing	1	2	y							North	Yes
1049	9	507	2015-05-27	2013-02-12	2680	f	1986	Works at home	High	1985	Employed	Middle	y	y	0	0	0		11.500	11.5	87.5	0.875	23	30	30	9	0	y	parents' bed	parents' bed	20	20	0	0	milk	nothing	nothing	nothing	1	0.5	y							North	No
1050	9	512	2015-05-27	2014-02-26	3200	m	1978	Unemployed	High	1967	Employed	High	y	y	2	0	0		10.200	10.2	79.0		22	30	30	7	0	c	own bed	own bed	20	20	0	0	juice	nothing	nothing	nothing	1	2								North	Yes
1051	9	517	2015-05-27	2009-05-27	2470	m	1987	Employed	High	1982	Employed	Middle	y	y	0	0	0		19.000	19	119.0	1.19	21	30	30	8	0	y	own bed	own bed	18	18	45	45	milk	sweet	nothing	nothing	0	0.5								North	Yes
1052	9	517	2015-05-27	2013-08-20	3700	f	1981	Employed	University	1980	Employed	University	y	y	0	1	0		12.000	12	89.0		21	30	30	8	0	y	own bed	own bed	19	19	0	0	milk & juice	nothing	milk & juice	nothing	2	2.75								North	No
1053	9	558	2015-05-27	2012-04-08	2870	m	1980	Employed	High				y	n	0	0	2	n	13.700	13.7	95.5	0.955	21	00	0	7	0	y	parents' bed	own bed	19	19	15	15	milk	nothing	nothing	nothing	1	0.5								North	Yes
1054	9	512	2015-05-27	2013-12-04	2180	f	1983	Employed	University	1979	Employed	University	y	y	1	0	0		9.400	9.4	77.2		21	15	15	7	0	c	own bed	own bed	19	19	0	0	milk	nothing	nothing	nothing	2	2.5								North	No
1055	9	512	2015-05-27	2013-12-04	2320	f	1983	Employed	University	1979	Employed	University	y	y	0	1	0		9.500	9.5	77.4		21	15	15	7	0	c	own bed	own bed	19	19	0	0	milk	nothing	nothing	nothing	3	2								North	No
1056	9	484	2015-05-27	2009-03-17	2800	f	1989	Employed	Middle	1985	Employed	Middle	y	y	0	0	1		17.400	17.4	116.0	1.16	21	45	45	7	0	n	parents' bed	parents' bed	20	20	0	0	milk	sweet	nothing	nothing	1	0.75								North	No
1057	9	518	2015-05-27	2011-08-05	2850	f	1981	Unemployed	High	1987	Employed	Middle	y	y	0	1	0		19.600	19.6	104.5	1.045	23	30	30	7	45	y	other room	own bed	20	20	0	0	milk	nothing	nothing	nothing	1	4								North	No
1058	9	518	2015-05-27	2013-05-16	3500	f	1981	Unemployed	High	1987	Employed	Middle	y	y	1	0	0		13.500	13.5	87.5	0.875	21	00	0	7	45	y	other room	own bed	20	20	0	0	milk	nothing	nothing	nothing	0	2								North	No
1059	20	489	2015-05-27	2009-04-03	4360	f	1981	Employed	University	1976	Employed	High	y	y	0	1	0		26.400	26.4	126.8	1.268	20	30	30	7	30	c	other room	own bed	19	19	45	45	nothing	nothing	nothing	nothing	0	0								North	No
1060	20	489	2015-05-27	2009-12-20	3100	f	1968	Employed	High	1971	Employed	Middle	y	y	1	0	0		16.200	16.2	107.4	1.074	21	30	30	7	0	c	other room	own bed	20	20	0	0	nothing	nothing	nothing	nothing	0	0								North	No
1061	9	514	2015-05-27	2004-08-18	3230	f	1974	Employed	High	1970	Employed	University	y	y	0	1	0		44.000	44	149.0	1.49	22	45	45	7	15	c	own bed	own bed	19	19	45	45	nothing	nothing	nothing	nothing	0	0								North	No
1062	9	485	2015-05-27	2006-06-05	2990	f	1969	Employed	High	1967	Employed	High	y	y	1	0	0		28.000	28	131.0	1.31	22	00	0	7	15	y	own bed	own bed	20	20	0	0	nothing	nothing	nothing	nothing	2	0								North	No
1063	9	510	2015-05-27	2011-06-07	3670	m	1975	Employed	High	1974	Employed	Middle	y	y	0	1	0		17.000	17	105.0	1.05	22	30	30	7	45	c	other room	parents' bed	19	19	0	0	milk	nothing	nothing	nothing	0	1								North	Yes
1064	15	504	2015-05-27	2011-10-24	2900	f	1977	Employed	High	1976	Employed	Middle	y	y	1	0	0		15.000	15	95.0	0.95	21	30	30	9	30	n	parents' bed	parents' bed	20	20	15	15	nothing	nothing	nothing	nothing	2	1.5								South	No
1065	9	521	2015-05-27	2008-08-30	1300	f	1981	Unemployed	Middle	1978	Employed	Middle	y	y	0	1	0		23.000	23	117.0	1.17	21	00	0	7	0	c	other room	own bed	19	19	30	30	nothing	nothing	nothing	nothing	0	0								North	No
1066	20	487	2015-05-27	2012-04-13	3750	m	1973	Employed	University	1970	Employed	University	y	y	1	0	0		14.700	14.7	94.0	0.94	22	30	30	7	15	y	own bed	own bed	20	20	0	0	nothing	fruit	nothing	nothing	2	0.75		y						North	Yes
1067	9	510	2015-05-27	2004-06-23	3200	m	1969	Employed	University	1967	Employed	High	y	y	0	1	0		30.700	30.7	141.5	1.415	22	30	30	6	30	c	own bed	own bed	19	19	30	30	nothing	nothing	nothing	nothing	1	0								North	Yes
1068	9	521	2015-05-27	2005-02-28	3150	f	1971	Employed	High	1967	Employed	High	y	y	2	0	0		46.000	46	151.0	1.51	22	00	0	6	45	c	own bed	own bed	20	20	0	0	nothing	nothing	nothing	nothing	0	0								North	No
1069	15	516	2015-05-27	2009-11-07	3400	m	1976	Employed	High				y	n	2	0	0	n	18.000	18	108.0	1.08	22	30	30	4	30	y	own bed	own bed	21	21	0	0	nothing	nothing	nothing	nothing	1	0								South	Yes
1070	20	565	2015-05-27	2010-12-09	4370	m	1975	Works at home	Middle	1973	Employed	Middle	y	n	1	0	0		17.000	17	104.0	1.04	22	00	0	7	15	c	other room	own bed	19	19	30	30	other	nothing	nothing	nothing	0	0								North	Yes
1071	20	565	2015-05-27	2006-08-12	3260	f	1975	Works at home	Middle	1973	Employed	Middle	y	n	0	1	0		26.000	26	131.0	1.31	21	45	45	7	30	c	own bed	own bed	19	19	30	30	nothing	nothing	nothing	nothing	0	0								North	No
1073	20	565	2015-05-27	2009-01-16	4140	f	1981	Employed	High	1976	Employed	High	y	y	0	1	0		33.500	33.5	122.5	1.225	22	00	0	7	15	y	own bed	own bed	19	19	0	0	milk & juice	nothing	nothing	nothing	0	0								North	No
1074	20	565	2015-05-27	2013-07-09	4200	m	1981	Employed	High	1976	Employed	High	y	y	1	0	0		12.000	12	83.0		22	00	0	7	0	y	own bed	own bed	19	19	0	0	milk	nothing	nothing	nothing	0	2								North	Yes
1075	16	548	2015-05-27	2009-05-31	3550	m	1966	Employed	Middle	1980	Other	High	y	n	0	0	0		25.500	25.5	121.0	1.21	21	45	45	7	15	y	own bed	own bed	19	19	30	30	nothing	nothing	nothing	nothing	0	0								Center	Yes
1076	4	491	2015-05-27	2011-12-15	3600	f	1980	Works at home	High	1979	Employed	High	y	y	1	0	0		19.000	19	98.0	0.98	22	00	0	8	0	y	own bed	own bed	19	19	0	0	nothing	sweet	nothing	nothing	0	1								South	No
1077	9	558	2015-05-27	2011-04-05	2890	f	1974	Employed	High	1970	Employed	High	y	y	1	0	4		15.400	15.4	100.0	1	21	30	30	7	30	y	own bed	own bed	20	20	0	0	nothing	nothing	nothing	nothing	0	0								North	No
1078	4	491	2015-05-27	2011-09-03	3130	m	1971	Employed	High	1967	Employed	University	y	y	0	0	1		16.000	16	100.5	1.005	22	30	30	8	30	n	parents' bed	parents' bed	19	19	0	0	milk	nothing	milk	nothing	1	0								South	Yes
1079	15	516	2015-05-27	2010-03-25	3340	m	1981	Employed	High	1980	Employed	High	y	y	0	0	0		16.000	16	108.0	1.08	23	45	45	6	0	y	parents' bed	parents' bed	21	21	45	45	juice	nothing	nothing	nothing	0	1								South	Yes
1081	17	534	2015-05-28	2012-12-29	2980	f	1975	Employed	University	1980	Employed	High	y	y	1	0	0		13.000	13	90.0	0.9	21	00	0	7	15	y	parents' bed	parents' bed	19	19	0	0	nothing	nothing	nothing	nothing	1	2								North	No
1082	9	503	2015-05-28	2010-08-13	3200	f	1967	Unemployed	High	1965	Employed	High	y	n	0	0	0		14.500	14.5	105.0	1.05	21	30	30	7	30	y	parents' bed	parents' bed	19	19	0	0	juice	sweet	nothing	nothing	0	0.75								North	No
1083	9	518	2015-05-28	2013-12-03	3350	m	1982	Unemployed	High	1974	Employed	University	y	y	0	0	0		10.900	10.9	82.0		21	30	30	7	45	y	own bed	own bed	20	20	0	0	nothing	nothing	nothing	nothing	0	3								North	Yes
1086	15	508	2015-05-28	2013-12-21	3600	m	1980	Works at home	Middle	1978	Employed	Middle	y	y	2	0	0		15.000	15	85.0		23	30	30	11	0	n	own bed	own bed	22	22	0	0	nothing	nothing	nothing	nothing	0	2								South	Yes
1087	20	575	2015-05-28	2005-09-02	2970	f	1974	Works at home	High	1972	Employed	High	y	y	1	1	0		44.200	44.2	151.0	1.51	22	00	0	7	15	c	own bed	own bed	19	19	30	30	milk	nothing	nothing	nothing	0	0								North	No
1088	15	508	2015-05-28	2010-09-07	2650	f	1973	Employed	University	1971	Employed	High	y	y	1	0	0		15.800	15.8	101.7	1.017	22	30	30	7	45	y	parents' bed	parents' bed	20	20	0	0	nothing	nothing	nothing	nothing	0	0								South	No
1089	15	508	2015-05-28	2011-04-23	3400	m	1977	Employed	Middle	1975	Employed	Middle	y	y	1	0	0		16.200	16.2	100.0	1	21	15	15	7	0	n	own bed	own bed	20	20	30	30	nothing	nothing	nothing	nothing	0	0								South	Yes
1090	15	508	2015-05-28	2011-11-20	3650	m	1984	Employed	Middle	1984	Employed	Middle	y	y	1	0	0		16.100	16.1	97.0	0.97	22	45	45	7	30	y	parents' bed	parents' bed	19	19	0	0	nothing	nothing	nothing	nothing	0	2								South	Yes
1094	9	512	2015-05-28	2002-03-10	3470	m	1971	Works at home	Middle	1971	Employed	High	y	y	1	0	0		66.600	66.6	170.2	1.702	22	30	30	7	0	y	own bed	own bed	20	20	0	0	nothing	nothing	nothing	nothing	1	0								North	Yes
1095	9	484	2015-05-28	2001-06-08	3300	f	1968	Employed	University	1962	Employed	High	y	y	0	1	0		48.700	48.7	165.0	1.65	22	30	30	6	45	c	own bed	own bed	19	19	45	45	nothing	nothing	nothing	nothing	0	0								North	No
1096	9	558	2015-05-28	2014-02-24	3560	f	1981	Employed	High	1980	Employed	High	y	y	0	0	4		10.300	10.3	77.5		21	30	30	9	0	n	own bed	own bed	19	19	30	30	nothing	nothing	nothing	nothing	4	2								North	No
1097	9	512	2015-05-28	2005-05-05	2930	f	1963	Employed	High	1971	Unemployed	Middle	y	y	0	0	0		32.200	32.2	136.0	1.36	23	00	0	7	0	y	own bed	own bed	19	19	30	30	nothing	nothing	nothing	nothing	0	0								North	No
1098	20	565	2015-05-28	2013-08-16	3720	f	1968	Employed	High	1969	Employed	Middle	y	y	0	0	0		11.600	11.6	83.0		21	45	45	6	15	y	own bed	own bed	19	19	45	45	nothing	nothing	nothing	nothing	1	3.25								North	No
1099	9	511	2015-05-28	2004-07-22	3980	m	1974	Employed	High	1966	Employed	High	y	y	0	0	0		35.500	35.5	150.5	1.505	22	15	15	7	15	y	own bed	own bed	21	21	0	0	nothing	nothing	nothing	nothing	0	0								North	Yes
1100	9	503	2015-05-28	2008-05-30	3020	f	1978	Works at home	High	1976	Employed	High	y	y	0	0	0		20.000	20	119.0	1.19	21	30	30	9	0	y	parents' bed	parents' bed	19	19	0	0	nothing	nothing	nothing	nothing	0	0								North	No
1101	9	560	2015-05-28	2013-08-20	2980	f	1983	Employed	High	1977	Employed	University	y	y	0	0	0		11.100	11.1	82.5		21	15	15	7	30	y	parents' bed	own bed	19	19	30	30	milk	nothing	nothing	nothing	0	1.75								North	No
1103	9	511	2015-05-28	2008-05-30	2900	m	1979	Unemployed	High	1969	Employed	High	y	y	1	0	0		22.500	22.5	123.5	1.235	22	00	0	7	30	c	own bed	own bed	20	20	0	0	nothing	nothing	nothing	nothing	0	0								North	Yes
1104	20	565	2015-05-28	2006-04-23	3850	f	1972	Employed	High	1972	Employed	Middle	y	y	1	0	0		29.300	29.3	136.5	1.365	21	15	15	7	15	y	parents' bed	parents' bed	19	19	30	30	nothing	nothing	nothing	nothing	0	0								North	No
1105	20	565	2015-05-28	2002-09-22	4080	m	1972	Employed	High	1972	Employed	Middle	y	y	0	1	0		64.000	64	163.0	1.63	21	15	15	7	0	y	own bed	own bed	19	19	30	30	nothing	nothing	nothing	nothing	0	0								North	Yes
1106	4	502	2015-05-28	2014-03-13	3360	f	1975	Works at home	High	1974	Employed	High	y	y	1	0	0		9.500	9.5	70.0		21	00	0	8	15	n	parents' bed	parents' bed	19	19	15	15	milk	nothing	milk	nothing	3	0.75								South	No
1107	9	513	2015-05-28	2003-07-12	2580	f	1973	Employed	High	1974	Employed	Middle	y	n	0	1	1		62.500	62.5	158.0	1.58	22	30	30	7	0	c	own bed	own bed	19	19	30	30	nothing	nothing	nothing	nothing	3	0								North	No
1108	9	507	2015-05-28	2013-01-20	3750	f	1978	Employed	University	1974	Employed	High	y	y	1	0	0		14.000	14	89.5	0.895	21	30	30	6	45	c	own bed	own bed	19	19	0	0	nothing	nothing	nothing	nothing	1	2								North	No
1109	4	502	2015-05-28	2006-01-25	3100	f	1974	Employed	High	1972	Employed	High	y	y	0	1	0		35.000	35	131.0	1.31	23	30	30	7	30	y	own bed	own bed	20	20	15	15	juice	sweet	nothing	nothing	0	0								South	No
1110	4	502	2015-05-28	2014-02-16	3190	m	1981	Works at home	High	1975	Employed	High	y	y	1	0	0		10.000	10	75.0		23	00	0	6	30	n	parents' bed	own bed	21	21	15	15	milk	sweet	milk	sweet	3	1								South	Yes
1113	20	571	2015-05-28	2013-08-31	2970	f	1982	Employed	University	1979	Employed	University	y	y	0	0	0		11.100	11.1	84.5		22	30	30	6	45	y	own bed	own bed	19	19	45	45	nothing	nothing	nothing	nothing	3	1.5								North	No
1114	9	525	2015-05-28	2006-10-28	3200	f	1973	Employed	University	1969	Employed	University	y	y	1	1	0		28.500	28.5	135.0	1.35	21	15	15	6	45	c	own bed	own bed	19	19	30	30	nothing	nothing	nothing	nothing	1	0								North	No
1115	9	525	2015-05-28	2003-11-15	4100	m	1969	Employed	University	1973	Employed	University	y	y	0	2	0		43.000	43	147.0	1.47	21	45	45	6	45	c	own bed	own bed	19	19	30	30	nothing	nothing	nothing	nothing	1	0								North	Yes
1116	15	497	2015-05-27	2012-03-26	3190	m	1980	Works at home	High	1978	Employed	Middle	y	y	1	0	0		15.000	15	99.0	0.99	23	00	0	8	0	y	own bed	own bed	20	20	0	0	nothing	nothing	nothing	nothing	0	1.5								South	Yes
1117	15	497	2015-05-27	2008-03-21	2950	f	1989	Works at home	High	1985	Employed	Middle	y	y	0	0	0		30.000	30	128.0	1.28	23	00	0	7	0	n	own bed	own bed	21	21	0	0	nothing	fruit	nothing	nothing	0	0.75								South	No
1118	15	508	2015-05-29	2012-05-26	3170	f	1981	Employed	University	1974	Employed	High	y	y	1	0	0		12.700	12.7	93.0	0.93	23	30	30	8	30	n	own bed	own bed	21	21	30	30	nothing	nothing	nothing	nothing	0	3								South	No
1120	15	508	2015-05-29	2007-05-15	3250	m	1977	Employed	Middle	1972	Employed	Middle	y	y	2	0	0		27.000	27	123.0	1.23	23	30	30	7	30	n	parents' bed	parents' bed	21	21	30	30	nothing	nothing	nothing	nothing	0	0								South	Yes
1122	20	571	2015-05-29	2008-04-30	2800	f	1983	Employed	High	1983	Employed	Middle	y	y	0	0	0		38.500	38.5	129.0	1.29	21	00	0	7	15	y	own bed	own bed	19	19	0	0	nothing	sweet	nothing	nothing	2	0								North	No
1123	9	512	2015-05-29	2012-04-25	3380	m	1980	Employed	High	1975	Employed	High	y	y	0	0	0		14.500	14.5	97.0	0.97	22	15	15	7	15	y	own bed	own bed	20	20	0	0	nothing	nothing	nothing	nothing	1	2								North	Yes
1125	17	534	2015-05-28	2014-01-20	3730	f	1989	Employed	High	1979	Employed	High	y	y	0	0	0		10.100	10.1	80.0		22	00	0	6	0	y	parents' bed	parents' bed	19	19	15	15	milk	nothing	nothing	nothing	0	0.75								North	No
1126	9	512	2015-05-29	2014-03-07	3860	m	1994	Unemployed	High	1993	Employed	Middle	y	n	0	0	2		10.700	10.7	77.5		21	15	15	7	30	na	own bed	own bed	19	19	0	0	nothing	other	nothing	nothing	0	3								North	Yes
1127	9	558	2015-05-29	2012-02-17	3140	m	1981	Employed	University	1980	Employed	University	y	y	0	0	4		16.600	16.6	102.5	1.025	22	00	0	7	30	y	own bed	own bed	19	19	30	30	milk	nothing	nothing	nothing	1	0								North	Yes
1128	15	508	2015-05-29	2012-09-24	4060	f	1988	Employed	High	1984	Employed	Middle	y	y	0	0	0		18.200	18.2	97.5	0.975	22	30	30	8	45	n	own bed	own bed	21	21	0	0	nothing	nothing	nothing	nothing	0	1								South	No
1129	9	512	2015-05-29	2013-03-06	3980	f	1989	Unemployed	High	1987	Employed	Middle	y	y	0	0	1		13.700	13.7	91.2	0.912	21	30	30	8	30	n	own bed	own bed	19	19	30	30	milk	nothing	nothing	nothing	0	2								North	No
1130	9	559	2015-05-28	2002-04-10	3280	m	1963	Employed	University	1958	Employed	University	y	y	0	0	0		58.000	58	172.0	1.72	22	15	15	6	45	y	own bed	own bed	20	20	0	0	nothing	nothing	nothing	nothing	1	0								North	Yes
1132	9	513	2015-05-29	2003-09-15	3000	m	1968	Employed	Middle	1967	Employed	Middle	y	y	1	0	0		40.000	40	154.0	1.54	21	45	45	7	15	y	own bed	own bed	19	19	15	15	nothing	nothing	nothing	nothing	0	0								North	Yes
1133	9	513	2015-05-29	2009-04-24	3380	m	1977	Employed	University	1970	Employed	Middle	y	y	0	1	0		21.500	21.5	119.0	1.19	21	30	30	7	15	c	own bed	own bed	20	20	0	0	nothing	nothing	nothing	nothing	0	0								North	Yes
1135	9	518	2015-05-29	2005-01-25	3170	f	1973	Works at home	High	1967	Employed	Middle	y	y	0	0	0		43.800	43.8	149.0	1.49	22	00	0	7	15	y	own bed	own bed	19	19	30	30	nothing	sweet	nothing	nothing	0	0								North	No
1136	9	484	2015-05-29	2014-02-21	3000	f	1975	Employed	University	1975	Employed	University	y	y	1	0	0		10.400	10.4	79.0		21	30	30	7	0	c	other room	own bed	19	19	30	30	nothing	nothing	nothing	nothing	0	3								North	No
1137	20	575	2015-05-29	2012-11-29	3640	m	1977	Employed	University	1967	Employed	High	y	y	1	0	0		14.200	14.2	92.5	0.925	20	30	30	7	30	c	parents' bed	parents' bed	19	19	15	15	nothing	nothing	milk	nothing	2	2.5								North	Yes
1138	9	518	2015-05-29	2004-05-21	2800	f	1974	Employed	Middle	1971	Employed	Middle	y	y	1	0	0		27.000	27	136.5	1.365	22	00	0	7	30	y	other room	own bed	20	20	15	15	nothing	nothing	nothing	nothing	0	0								North	No
1139	20	575	2015-05-29	2009-05-14	3460	f	1977	Employed	University	1967	Employed	High	y	y	0	1	0		25.000	25	120.0	1.2	20	45	45	7	0	c	own bed	own bed	19	19	15	15	nothing	nothing	nothing	nothing	0	0								North	No
1142	9	485	2015-05-29	2002-05-18	2550	f	1982	Employed	University	1979	Employed	High	y	y	1	0	0		42.700	42.7	156.0	1.56	22	15	15	7	45	c	own bed	own bed	20	20	0	0	nothing	nothing	nothing	nothing	2	0								North	No
1143	9	485	2015-05-29	2002-05-18	2800	f	1982	Employed	University	1979	Employed	High	y	y	0	1	0		45.600	45.6	160.0	1.6	22	15	15	7	45	c	own bed	own bed	20	20	0	0	nothing	nothing	nothing	nothing	1	0								North	No
1144	9	484	2015-05-29	2005-05-15	3500	m	1962	Works at home	High	1956	Employed	High	y	y	1	0	0		35.800	35.8	145.0	1.45	23	45	45	7	30	y	parents' bed	own bed	20	20	15	15	juice	nothing	nothing	nothing	0	0								North	Yes
1145	9	485	2015-05-29	2006-01-14	3300	f	1973	Employed	High	1970	Employed	University	y	y	1	0	0		27.100	27.1	134.0	1.34	21	45	45	7	30	y	other room	own bed	20	20	15	15	nothing	fruit	nothing	nothing	2	0								North	No
1146	9	515	2015-05-28	2014-01-01	4020	m	1981	Employed	University	1983	Employed	University	y	y	0	0	0		10.000	10	82.0		21	00	0	7	30	y	own bed	parents' bed	19	19	30	30	nothing	nothing	nothing	nothing	4	1.75								North	Yes
1147	9	515	2015-05-29	2010-09-24	2720	f	1978	Employed	University	1978	Employed	University	y	y	0	1	0		17.000	17	105.0	1.05	21	30	30	8	0	c	own bed	own bed	19	19	45	45	nothing	nothing	nothing	nothing	0	0								North	No
1148	9	515	2015-05-29	2012-11-20	3400	f	1978	Employed	University	1978	Employed	University	y	y	1	0	0		12.500	12.5	90.0	0.9	21	30	30	8	0	c	own bed	own bed	19	19	45	45	nothing	nothing	nothing	nothing	1	1.5								North	No
1149	9	485	2015-05-29	2009-04-10	3280	f	1978	Employed	High	1980	Employed	High	y	y	0	0	0		19.400	19.4	117.0	1.17	22	30	30	7	30	y	own bed	own bed	19	19	30	30	nothing	nothing	nothing	nothing	0	0								North	No
1150	9	485	2015-05-29	2002-04-11	2870	f	1969	Employed	University	1966	Employed	University	y	y	1	1	0		45.500	45.5	162.0	1.62	22	30	30	7	45	c	own bed	own bed	20	20	30	30	nothing	nothing	nothing	nothing	1	0								North	No
1151	15	519	2015-05-29	2012-07-08	3050	f	1984	Works at home	Middle	1981	Employed	Middle	y	y	1	0	0		14.000	14	100.0	1	22	00	0	8	30	c	parents' bed	parents' bed	20	20	30	30	juice	nothing	nothing	nothing	2	1		y						South	No
1152	15	519	2015-05-29	2011-06-30	3300	m	1987	Employed	Middle	1987	Employed	Middle	y	y	0	0	0		16.000	16	111.0	1.11	21	30	30	7	30	y	own bed	own bed	20	20	15	15	milk	nothing	juice	nothing	1	1.5								South	Yes
1153	15	519	2015-05-29	2010-02-28	3900	m	1988	Works at home	High	1984	Employed	High	y	y	0	0	2		20.000	20	121.0	1.21	22	30	30	7	15	y	own bed	own bed	20	20	0	0	nothing	nothing	nothing	nothing	0	0.5								South	Yes
1154	15	519	2015-05-29	2009-08-30	3200	m	1985	Works at home	High	1984	Unemployed	High	y	y	0	1	0		26.000	26	128.0	1.28	22	00	0	7	15	c	own bed	own bed	21	21	0	0	nothing	nothing	nothing	nothing	0	0								South	Yes
1155	15	519	2015-05-29	2011-09-25	3000	f	1988	Employed	Middle	1982	Employed	High	y	y	0	0	0		16.000	16	118.0	1.18	21	00	0	6	45	n	parents' bed	parents' bed	20	20	30	30	milk	nothing	nothing	nothing	1	1.25								South	No
1156	15	572	2015-05-13	2010-01-05	4000	m	1980	Works at home	High	1977	Other	Middle	y	y	2	0	0		20.000	20	117.0	1.17	21	00	0	7	0	y	own bed	own bed	20	20	0	0	nothing	nothing	nothing	nothing	0	0								South	Yes
1157	15	541	2015-06-03	2009-05-26	3420	f	1981	Employed	High	1975	Employed	High	y	y	0	0	0		32.000	32	119.0	1.19	23	00	0	8	0	y	parents' bed	own bed	20	20	30	30	nothing	salted	nothing	nothing	1	0								South	No
1158	15	572	2015-05-29	2013-11-25	3060	f	1972	Employed	University	1968	Employed	University	y	y	0	0	0		9.500	9.5	78.0		22	00	0	6	0	n	parents' bed	parents' bed	20	20	0	0	milk	nothing	nothing	nothing	0	0								South	No
1159	15	572	2015-05-28	2013-07-17	3200	f	1977	Unemployed	High	1980	Employed	High	y	y	0	0	2		11.000	11	83.0		24	00	0	8	30	n	own bed	own bed	21	21	30	30	nothing	nothing	nothing	nothing	1	2								South	No
1160	15	572	2015-05-28	2012-07-17	2880	f	1981	Works at home	University	1988	Employed	High	y	y	0	1	0		13.000	13	92.0	0.92	22	00	0	8	0	y	parents' bed	own bed	19	19	30	30	nothing	nothing	nothing	nothing	0	0								South	No
1161	15	572	2015-05-13	2011-11-08	4080	f	1985	Employed	University	1973	Employed	High	y	y	0	0	0		22.000	22	107.0	1.07	22	30	30	10	15	c	own bed	own bed	20	20	15	15	nothing	nothing	nothing	nothing	0	0								South	No
1162	15	541	2015-06-03	2013-09-06	3465	m	1973	Works at home	Middle	1973	Employed	Middle	y	y	2	0	0		12.000	12	76.0		23	30	30	7	0	n	parents' bed	own bed	21	21	15	15	nothing	nothing	nothing	nothing	3	2								South	Yes
1163	15	541	2015-06-03	2008-07-28	2960	f	1971	Works at home	High	1971	Employed	Middle	y	y	1	0	0		21.400	21.4	120.0	1.2	22	30	30	10	0	c	other room	other room	21	21	0	0	milk	nothing	nothing	nothing	2	0								South	No
1164	7	585	2015-06-04	2002-06-13	3040	f	1964	Employed	Middle	1969	Employed	Middle	y	y	1	0	0		65.000	65	167.5	1.675	22	30	30	7	0	c	own bed	own bed	19	19	0	0	nothing	nothing	nothing	nothing	0	0.5		y						Center	No
1165	9	484	2015-06-04	2002-06-03	2340	m	1978	Employed	Middle	1966	Employed	Middle	y	y	0	2	0		55.500	55.5	155.0	1.55	22	30	30	7	0	c	own bed	own bed	20	20	30	30	nothing	nothing	nothing	nothing	0	0								North	Yes
1166	10	505	2015-06-04	2009-03-22	3970	f	1973	Employed	University	1974	Employed	High	y	n	0	0	0		30.000	30	124.7	1.247	21	30	30	8	0	n	parents' bed	parents' bed	19	19	45	45	nothing	nothing	nothing	nothing	1	0								Center	No
1167	15	508	2015-06-04	2011-08-13	4000	f	1989	Works at home	Middle	1979	Employed	High	y	y	0	0	0		15.900	15.9	105.5	1.055	24	00	0	8	15	y	own bed	own bed	21	21	0	0	milk	nothing	nothing	nothing	0	0								South	No
1168	15	508	2015-06-04	2009-11-24	3330	f	1979	Employed	High	1980	Employed	High	y	y	0	0	0		21.500	21.5	120.5	1.205	22	00	0	8	0	y	own bed	own bed	20	20	30	30	nothing	nothing	nothing	nothing	0	0								South	No
1169	15	508	2015-06-04	2013-05-04	2800	f	1968	Employed	High	1962	Employed	Middle	y	y	1	0	0		11.000	11	82.0	0.82	22	00	0	8	30	n	own bed	own bed	20	20	45	45	milk	nothing	nothing	nothing	2	2								South	No
1170	7	585	2015-06-04	2006-11-10	3200	f	1980	Employed	Middle	1971	Employed	High	y	y	0	0	0		27.700	27.7	130.0	1.3	21	30	30	7	15	y	own bed	own bed	20	20	15	15	nothing	nothing	nothing	nothing	1	0								Center	No
1171	15	508	2015-06-04	2011-06-16	2850	f	1980	Employed	High	1975	Employed	Middle	y	y	1	0	0		15.000	15	100.5	1.005	22	30	30	7	45	y	own bed	own bed	20	20	0	0	nothing	nothing	nothing	nothing	0	0								South	No
1172	9	512	2015-06-04	2012-08-05	3200	f	1990	Employed	High	1982	Employed	High	y	y	0	0	0		14.500	14.5	96.0	0.96	22	00	0	7	0	n	other room	own bed	19	19	30	30	nothing	fruit	nothing	nothing	0	1.5								North	No
1173	9	484	2015-06-04	2001-06-12	2590	m	1965	Employed	High	1963	Employed	Middle	y	y	1	0	0		59.700	59.7	170.0	1.7	24	00	0	7	30	c	own bed	own bed	21	21	0	0	juice	nothing	nothing	nothing	0	0								North	Yes
1175	20	565	2015-06-04	2007-08-13	3050	f													30.000	30	128.3	1.283	23	00	0	7	0	c	own bed	own bed	19	19	30	30	nothing	nothing	nothing	nothing	0	0								North	No
1176	15	516	2015-06-04	2003-04-26	3200	m	1974	Works at home	High	1974	Employed	Middle	y	y	1	0	5		53.500	53.5	154.0	1.54	23	00	0	7	15	y	own bed	own bed	21	21	0	0	nothing	nothing	nothing	fruit & sweet	0	0								South	Yes
1177	9	512	2015-06-04	2003-06-25	3400	m	1973	Employed	Middle	1969	Employed	High	y	y	0	1	0		63.500	63.5	163.7	1.637	22	00	0	7	30	c	own bed	own bed	19	19	30	30	nothing	sweet	nothing	nothing	0	0								North	Yes
1178	9	511	2015-06-04	2011-04-29	3120	m	1971	Employed	High	1971	Employed	High	y	y	0	0	0		16.000	16	103.0	1.03	22	00	0	7	0	y	parents' bed	own bed	19	19	30	30	nothing	nothing	nothing	nothing	0	2.25								North	Yes
1179	9	511	2015-06-04	2013-01-23	3200	f	1976	Employed	High	1979	Employed	Middle	y	y	0	0	0		10.530	10.53	87.5	0.875	22	30	30	6	45	n	parents' bed	own bed	19	19	30	30	nothing	nothing	nothing	nothing	0	2								North	No
1180	9	560	2015-06-04	2008-01-24	3330	f	1987	Employed	High	1978	Employed	High	y	y	0	0	0		28.900	28.9	131.5	1.315	21	00	0	6	45	y	own bed	own bed	20	20	0	0	nothing	nothing	nothing	nothing	0	0								North	No
1181	9	503	2015-06-05	2009-11-03	1280	f	1976	Works at home	High	1966	Employed	High	y	y	0	1	0		17.600	17.6	109.0	1.09	21	30	30	6	15	c	own bed	own bed	19	19	30	30	nothing	nothing	nothing	nothing	0	0								North	No
1182	9	503	2015-06-05	2009-11-03	1420	f	1976	Works at home	High	1966	Employed	High	y	y	1	0	0		19.000	19	111.0	1.11	22	00	0	6	30	c	parents' bed	own bed	19	19	30	30	nothing	nothing	nothing	nothing	0	0								North	No
1183	9	512	2015-06-05	2012-05-16	3680	m	1982	Works at home	High	1977	Employed	High	y	y	0	0	0		15.700	15.7	96.6	0.966	21	45	45	7	30	n	parents' bed	parents' bed	20	20	0	0	nothing	sweet	nothing	nothing	1	1.5								North	Yes
1184	9	525	2015-06-04	2013-06-12	3030	m	1990	Employed	High	1980	Employed	High	y	y	0	0	0		11.700	11.7	90.5		22	00	0	7	30	n	own bed	own bed	19	19	15	15	milk	nothing	nothing		0	2								North	Yes
1185	9	525	2015-06-04	2010-02-20	3530	f	1987	Employed	High	1984	Employed	High	y	y	0	1	0		17.000	17	100.0	1	22	00	0	7	0	c	parents' bed	own bed	19	19	30	30	nothing	nothing	nothing	nothing	0	0								North	No
1186	9	525	2015-06-04	2008-05-16	3400	m	1978	Employed	University	1957	Employed	University	y	y	0	1	0		28.500	28.5	136.0	1.36	22	00	0	7	0	y	own bed	own bed	19	19	30	30	nothing	nothing	nothing	nothing	1	0								North	Yes
1187	7	585	2015-06-05	2012-07-23	3100	m	1982	Employed	University	1981	Unemployed	High	y	y	1	0	0		15.200	15.2	94.0	0.94	23	30	30	7	15	y	parents' bed	parents' bed	19	19	30	30	nothing	nothing	nothing	nothing	0	1.5								Center	Yes
1188	20	574	2015-06-05	2006-02-15	2850	f	1976	Employed	High	1973	Employed	High	y	y	0	1	0		29.000	29	135.0	1.35	21	15	15	7	15	c	own bed	own bed	19	19	30	30	nothing	nothing	nothing	nothing	0	0								North	No
1189	7	585	2015-06-05	2006-12-27	3000	m	1974	Employed	University	1972	Employed	University	y	y	0	1	0		24.000	24	123.0	1.23	21	00	0	7	15	c	own bed	own bed	20	20	30	30	nothing	nothing	nothing	nothing	0	0								Center	Yes
1190	9	485	2015-06-05	2001-06-09	3100	f	1970	Works at home	High	1967	Employed	High	y	y	0	3	0		52.800	52.8	171.0	1.71	21	30	30	7	45	c	own bed	own bed	19	19	30	30	nothing	nothing	nothing	nothing	0	0								North	No
1191	9	485	2015-06-05	2010-03-04	3300	f	1972	Works at home	High	1968	Employed	High	y	y	3	0	0		20.700	20.7	116.0	1.16	21	30	30	8	0	c	other room	own bed	19	19	30	30	nothing	nothing	nothing	nothing	1	0								North	No
1192	9	485	2015-06-05	2005-12-17	2900	f	1975	Employed	High	1975	Employed	High	y	y	1	0	0		27.200	27.2	137.5	1.375	22	00	0	7	30	c	own bed	own bed	20	20	30	30	nothing	nothing	nothing	nothing	1	0								North	No
1193	9	515	2015-06-05	2009-10-02	2480	f	1977	Employed	High	1972	Employed	High	y	y	0	0	0		19.500	19.5	115.0	1.15	21	45	45	8	0	y	own bed	own bed	20	20	0	0	nothing	nothing	nothing	nothing	1	0								North	No
1194	9	515	2015-06-05	2009-09-29	3300	f	1975	Employed	High	1964	Employed	High	y	y	1	0	0		20.300	20.3	111.0	1.11	22	00	0	7	30	c	own bed	own bed	20	20	0	0	nothing	nothing	nothing	nothing	2	0								North	No
1196	20	489	2015-06-04	2014-05-06	3320	m	1978	Employed	University	1973	Employed	High	y	y	1	0	0		9.600	9.6	76.0		22	30	30	8	30	c	own bed	own bed	20	20	0	0	nothing	nothing	nothing	nothing	2	3								North	Yes
1197	20	489	2015-06-04	2014-05-24	3720	m	1979	Works at home	High	1978	Employed	High	y	y	1	0	0		9.780	9.78	78.5		21	15	15	7	0	c	own bed	own bed	19	19	45	45	nothing	nothing	nothing	nothing	0	2.75								North	Yes
1198	20	499	2015-06-05	2012-12-05	3400	f	1979	Employed	University	1978	Employed	University	y	y	0	1	0		12.100	12.1	88.0	0.88	22	15	15	7	45	c	own bed	own bed	20	20	0	0	milk	nothing	nothing	nothing	1	2								North	No
1199	9	531	2015-06-04	2005-03-24	2830	f	1961	Employed	High	1963	Employed	University	y	y	0	0	1		32.000	32	136.0	1.36	22	00	0	7	30	y	parents' bed	parents' bed	20	20	0	0	nothing	nothing	nothing	nothing	0	0								North	No
1200	9	531	2015-06-04	2003-08-12	2130	f	1967	Employed	High	1963			y	y	0	1	0	n	48.000	48	150.0	1.5	22	00	0	6	30	c	own bed	own bed	19	19	45	45	nothing	nothing	nothing	nothing	1	0								North	No
1201	9	531	2015-06-04	2010-06-10	3300	m	1979	Employed	University	1965	Employed	High	y	y	0	0	0		15.000	15	106.0	1.06	22	00	0	7	45	y	parents' bed	parents' bed	19	19	45	45	milk	nothing	nothing	nothing	1	0.75								North	Yes
1202	9	531	2015-06-04	2009-11-21	3800	m	1980	Employed	High	1977	Employed	High	y	y	1	1	0		21.000	21	115.0	1.15	23	00	0	7	0	y	own bed	parents' bed	19	19	30	30	nothing	nothing	nothing	nothing	1	0								North	Yes
1203	9	531	2015-06-04	2014-02-02	2890	f	1976	Employed	University	1976	Employed	University	y	y	1	0	0		8.400	8.4	75.0		21	00	0	6	30	n	own bed	own bed	19	19	0	0	milk	nothing	nothing	nothing	1	1.25								North	No
1204	15	572	2015-06-05	2011-03-02	3100	m	1976	Employed	University	1978	Employed	University	y	y	1	0	0		16.500	16.5	101.0	1.01	22	00	0	7	0	y	outside home	own bed	19	19	30	30	nothing	nothing	nothing	nothing	1	2								South	Yes
1205	15	572	2015-06-05	2014-05-15	3720	f	1983	Works at home	High	1982	Employed	High	y	y	0	0	0		10.900	10.9	78.5		21	00	0	7	15	y	own bed	parents' bed	19	19	15	15	nothing	nothing	nothing	nothing	2	2								South	No
1206	15	572	2015-06-05	2011-07-14	2800	f	1996	Works at home	Middle	1992	Unemployed	Middle	y	y	0	0	0		15.000	15	94.5	0.945	21	30	30	7	0	y	parents' bed	own bed	20	20	30	30	milk	nothing	nothing	nothing	0	2.5								South	No
1207	15	572	2015-06-03	2010-12-22	4050	f	1980	Works at home	High	1977	Employed	Middle	y	y	0	1	0		20.000	20	113.0	1.13	22	30	30	7	30	y	own bed	own bed	20	20	0	0	nothing	fruit	nothing	nothing	1	2								South	No
1208	15	572	2015-06-03	2012-11-07	3930	m	1982	Works at home	High	1980	Employed	High	y	y	0	0	0		13.000	13	88.5	0.885	22	15	15	8	0	y	parents' bed	own bed	20	20	15	15	nothing	nothing	nothing	nothing	3	0								South	Yes
1209	15	572	2015-06-03	2009-10-20	3050	f	1974	Works at home	High	1966	Employed	University	y	y	1	0	0		25.500	25.5	118.0	1.18	21	00	0	7	15	y	other room	own bed	19	19	45	45	nothing	sweet	nothing	nothing	0	0								South	No
1210	9	507	2015-06-09	2010-04-25	3480	f	1989	Works at home	High	1979	Employed	High	y	y	0	1	0		17.000	17	108.5	1.085	22	30	30	7	30	y	own bed	own bed	20	20	0	0	nothing	nothing	nothing	nothing	1	0								North	No
1212	15	572	2015-06-05	2014-04-14	3360	f	1974	Employed	High	1972	Employed	University	y	y	2	0	0		9.800	9.8	70.0		22	30	30	7	30	n	parents' bed	parents' bed	20	20	0	0	milk	nothing	nothing	nothing	0	2.5								South	No
1213	15	508	2015-06-09	2009-02-22	3450	m	1974	Employed	University	1972	Employed	High	y	y	0	1	0		18.000	18	118.5	1.185	22	00	0	7	0	n	own bed	own bed	19	19	30	30	nothing	nothing	nothing	nothing	0	0								South	Yes
1214	20	574	2015-06-09	2002-05-29	2990	f	1977	Employed	High	1973	Employed	Middle	y	y	0	1	0		25.000	25	134.0	1.34	22	00	0	6	45	c	own bed	own bed	20	20	0	0	nothing	nothing	nothing	nothing	0	0								North	No
1215	15	508	2015-06-09	2010-08-04	3950	m	1974	Employed	University	1972	Employed	High	y	y	1	0	0		17.000	17	110.0	1.1	21	45	45	7	0	n	own bed	own bed	19	19	30	30	nothing	nothing	nothing	nothing	0	1.5								South	Yes
1216	20	489	2015-06-09	2013-09-17	3040	f	1976	Works at home	Middle	1975	Employed	Middle	y	y	1	0	0		10.400	10.4	82.0		21	30	30	7	15	c	own bed	own bed	20	20	15	15	nothing	nothing	nothing	nothing	1	3								North	No
1217	20	489	2015-06-09	2014-05-15	3430	f	1981	Works at home	High	1972	Employed	High	y	y	0	0	0		11.050	11.05	78.5		21	15	15	8	0	y	own bed	own bed	20	20	0	0	milk	nothing	nothing	nothing	1	2								North	No
1218	9	558	2015-06-09	2013-02-05	3330	m	1979	Employed	Middle	1977	Employed	Middle	y	y	0	0	3		12.500	12.5	88.5	0.885	21	30	30	7	30	y	own bed	own bed	20	20	0	0	nothing	nothing	nothing	nothing	2	1								North	Yes
1219	9	558	2015-06-09	2007-05-04	3270	f	1975	Employed	High	1974	Employed	High	y	y	0	1	4		26.500	26.5	133.0	1.33	23	30	30	8	0	c	own bed	parents' bed	20	20	0	0	nothing	nothing	nothing	nothing	3	0	y	y						North	No
1220	9	558	2015-06-09	2014-02-19	3400	m	1980	Employed	University	1976	Employed	University	y	y	1	0	4		9.900	9.9	78.0		21	30	30	7	0	c	own bed	own bed	19	19	30	30	milk	nothing	nothing	nothing	1	2								North	Yes
1221	15	508	2015-06-09	2004-06-19	3100	m	1976	Employed	Middle	1971	Employed	Elementary	y	y	0	1	0		47.000	47	148.0	1.48	21	45	45	7	45	c	own bed	own bed	20	20	15	15	nothing	nothing	nothing	nothing	0	0								South	Yes
1222	9	560	2015-06-09	2010-11-22	3090	f	1981	Works at home	High	1982	Employed	University	y	y	0	1	0		17.500	17.5	105.0	1.05	21	15	15	7	45	c	own bed	own bed	19	19	15	15	nothing	nothing	nothing	nothing	0	0								North	No
1223	15	508	2015-06-09	2008-10-13	3400	m	1976	Employed	Middle	1971	Employed	Elementary	y	y	0	1	0		27.000	27	122.5	1.225	21	45	45	7	30	c	own bed	own bed	20	20	15	15	nothing	nothing	nothing	nothing	2	1								South	Yes
1224	20	499	2015-06-09	2004-03-02	2690	m	1968	Employed	High	1964	Employed	High	y	y	1	0	0		46.600	46.6	147.0	1.47	22	30	30	7	30	c	own bed	own bed	20	20	15	15	nothing	nothing	nothing	nothing	1	0								North	Yes
1225	4	491	2015-06-09	2013-06-10	3500	f	1979	Works at home	High	1974	Employed	High	y	y	0	0	0		11.800	11.8	89.5		23	30	30	9	0	n	parents' bed	own bed	20	20	0	0	nothing	nothing	nothing	nothing	1	3								South	No
1226	15	541	2015-06-09	2011-04-29	3180	f	1980	Employed	High	1980	Employed	High	y	y	0	0	0		17.000	17	99.5	0.995	22	00	0	7	30	y	parents' bed	parents' bed	20	20	0	0	nothing	nothing	nothing	nothing	1	0.75								South	No
1227	15	541	2015-06-09	2004-12-20	3120	f	1978	Works at home	High	1976	Employed	High	y	y	1	2	0		35.000	35	138.0	1.38	21	00	0	7	0	y	own bed	parents' bed	20	20	0	0	nothing	nothing	nothing	nothing	1	0								South	No
1228	15	541	2015-06-09	2007-07-14	1200	m	1978	Works at home	High	1976	Employed	High	y	y	2	1	0		24.000	24	119.0	1.19	22	30	30	7	0	y	own bed	own bed	20	20	0	0	nothing	nothing	nothing	nothing	0	0								South	Yes
1229	15	508	2015-06-10	2009-04-01	2630	m	1973	Employed	High	1972	Employed	Middle	y	y	1	0	0		22.500	22.5	118.5	1.185	23	00	0	6	30	c	own bed	own bed	20	20	30	30	nothing	nothing	nothing	nothing	2	2								South	Yes
1231	15	508	2015-06-10	2008-06-30	3350	m	1978	Employed	High	1976	Employed	High	y	y	0	1	0		24.500	24.5	126.0	1.26	23	00	0	7	15	y	own bed	own bed	21	21	0	0	nothing	nothing	nothing	nothing	1	0								South	Yes
1232	20	575	2015-06-10	2013-12-09	2840	f	1974	Unemployed	University	1966	Employed	High	y	y	0	0	0		10.570	10.57	80.5		21	00	0	8	30	y	parents' bed	parents' bed	20	20	0	0	nothing	nothing	nothing	nothing	5	3								North	No
1233	9	512	2015-06-10	2013-04-25	3470	f	1984	Unemployed	Middle	1979	Employed	Middle	y	y	0	0	2		12.200	12.2	87.0	0.87	23	00	0	7	0	n	own bed	own bed	19	19	30	30	juice	nothing	nothing	nothing	1	3								North	No
1234	9	559	2015-06-09	2006-03-02	3250	f	1968	Works at home	University	1971	Employed	High	y	y	1	1	0		29.000	29	132.0	1.32	21	30	30	7	45	c	own bed	own bed	19	19	0	0	milk	nothing	nothing	nothing	0	0								North	No
1235	10	505	2015-06-10	2014-05-30	3000	f	1978	Employed	High	1977	Employed	High	y	y	1	0	0		8.200	8.2	72.5		22	00	0	7	0	n	own bed	own bed	19	19	15	15	nothing	nothing	nothing	nothing	0	2								Center	No
1236	10	505	2015-06-10	2009-09-12	2800	f	1978	Employed	High	1977	Employed	High	y	y	0	1	0		15.700	15.7	104.0	1.04	22	00	0	7	0	y	own bed	own bed	19	19	45	45	nothing	nothing	nothing	nothing	0	0								Center	No
1237	15	504	2015-06-10	2011-06-24	3320	m	1982	Employed	High	1979	Employed	High	y	y	0	0	0		16.000	16	98.0	0.98	22	00	0	7	0	y	parents' bed	own bed	20	20	30	30		nothing	nothing	nothing	0	2								South	Yes
1238	16	548	2015-06-05	2009-07-27	3550	f	1983	Works at home	University	1980	Employed	High	y	y	0	2	0		20.000	20	100.0	1	21	30	30	7	30	y	own bed	own bed	20	20	0	0	nothing	nothing	nothing	nothing	0	0								Center	No
1239	16	548	2015-06-10	2011-07-06	3580	f	1983	Works at home	University	1980	Employed	High	y	y	1	1	0		16.000	16	97.0	0.97	21	30	30	7	30	y	own bed	own bed	20	20	0	0	nothing	nothing	nothing	nothing	2	1								Center	No
1242	9	507	2015-06-11	2010-04-14	3340	f	1975	Employed	High	1975	Employed	High	y	y	1	0	0		17.000	17	113.0	1.13	21	30	30	7	15	c	own bed	own bed	19	19	0	0	nothing	sweet	nothing	nothing	0	0								North	No
1243	9	515	2015-06-09	2013-12-19	3020	m	1988	Employed	High	1985	Employed	Middle	y	y	0	0	0		12.600	12.6	85.0		22	30	30	7	30	y	own bed	own bed	20	20	0	0	milk & juice	nothing	nothing	nothing	3	3								North	Yes
1244	9	560	2015-06-11	2010-08-19	2720	m	1980	Employed	University	1983	Works at home	University	y	y	0	1	0		18.700	18.7	110.5	1.105	21	15	15	7	30	c	own bed	own bed	19	19	15	15	nothing	nothing	nothing	nothing	0	0								North	Yes
1245	9	560	2015-06-11	2012-06-27	3500	f	1980	Employed	University	1983	Works at home	University	y	y	1	0	0		14.500	14.5	92.0	0.92	21	00	0	7	30	c	own bed	own bed	19	19	15	15	nothing	nothing	nothing	nothing	1	1.5								North	No
1246	9	558	2015-06-11	2012-02-06	3100	m	1975	Employed	High	1973	Employed	High	y	y	0	0	4		16.100	16.1	101.0	1.01	21	30	30	7	30	y	own bed	parents' bed	20	20	0	0	juice	nothing	nothing	nothing	3	0								North	Yes
1247	15	508	2015-06-11	2011-11-08	3250	f	1980	Works at home	High	1972	Employed	High	y	y	1	1	0		16.000	16	99.0	0.99	22	00	0	7	30	c	own bed	own bed	20	20	0	0	nothing	nothing	nothing	nothing	1	1								South	No
1248	15	508	2015-06-11	2007-03-17	3250	m	1980	Works at home	High	1972	Employed	High	y	y	0	2	0		40.000	40	133.5	1.335	23	00	0	7	15	c	own bed	own bed	22	22	0	0	nothing	nothing	nothing	nothing	0	0								South	Yes
1249	9	511	2015-06-11	2009-06-27	3750	f	1977	Employed	High	1973	Employed	Middle	y	y	1	0	0		18.000	18	115.5	1.155	21	00	0	6	30	c	own bed	own bed	19	19	0	0	nothing	nothing	nothing	nothing	0	0								North	No
1250	9	511	2015-06-11	2009-04-02	3200	f	1981	Employed	High	1981	Employed	High	y	y	1	0	0		27.000	27	118.0	1.18	21	15	15	7	0	c	own bed	own bed	19	19	30	30	nothing	nothing	nothing	nothing	1	0								North	No
1251	9	560	2015-06-11	2011-12-09	2100	f	1977	Employed	High	1976	Employed	High	y	y	0	0	0		18.300	18.3	103.0	1.03	20	30	30	5	30	y	own bed	parents' bed	18	18	45	45	milk	nothing	milk & juice	nothing	5	0.75	y							North	No
1253	9	553	2015-06-12	2012-07-30	3410	f	1981	Employed	University	1979	Employed	University	y	y	0	0	0		14.400	14.4	95.8	0.958	22	30	30	7	30	n	own bed	own bed	19	19	30	30	nothing	nothing	nothing	nothing	0	2								North	No
1255	9	558	2015-06-12	2009-03-10	3000	m	1978	Employed	High	1970	Employed	University	y	y	0	1	4		21.700	21.7	120.0	1.2	21	30	30	7	30	y	own bed	own bed	19	19	30	30	juice	nothing	nothing	nothing	0	0								North	Yes
1259	9	518	2015-06-12	2012-06-10	3980	f	1974	Employed	University	1970	Employed	University	y	y	1	0	0		14.500	14.5	96.5	0.965	22	30	30	7	0	y	parents' bed	own bed	20	20	30	30	nothing	nothing	nothing	nothing	0	2.5								North	No
1260	9	531	2015-06-09	2003-10-30	3380	f	1970	Employed	High	1967	Employed	High	y	y	1	0	0		24.000	24	119.0	1.19	22	00	0	6	15	c	parents' bed	parents' bed	20	20	0	0	nothing	nothing	nothing	nothing	2	0.75								North	No
1261	9	531	2015-06-10	2010-01-27	2950	f	1973	Employed	High	1972	Employed	High	y	y	1	0	0		16.000	16	106.0	1.06	21	30	30	7	30	c	own bed	own bed	19	19	30	30	nothing	nothing	nothing	nothing	0	0								North	No
1262	9	531	2015-06-10	2009-04-24	3850	f	1971	Works at home	University	1973	Employed	University	y	y	0	1	0		27.000	27	119.0	1.19	21	30	30	7	15	c	own bed	own bed	20	20	0	0	juice	nothing	nothing	nothing	0	0								North	No
1265	7	585	2015-06-12	2006-09-01	3680	m	1985	Employed	High	1978	Unemployed	Middle	y	n	0	1	3		30.000	30	133.0	1.33	22	45	45	9	15	n	parents' bed	parents' bed	21	21	0	0	nothing	nothing	nothing	nothing	1	0								Center	Yes
1266	7	585	2015-06-11	2011-03-25	2970	f	1975	Works at home	High	1971	Employed	Middle	y	y	2	0	0		14.800	14.8	110.0	1.1	22	30	30	8	45	na			21	21	0	0	nothing	nothing	nothing	nothing	0	0								Center	No
1267	7	585	2015-06-12	2008-02-26	2600	f	1979	Employed	Middle	1977	Employed	Middle	y	y	1	0	0		22.400	22.4	117.5	1.175	24	00	0	9	45	y	own bed	own bed	20	20	30	30	nothing	nothing	nothing	nothing	1	0								Center	No
1268	20	489	2015-06-10	2009-04-15	4120	m	1979	Employed	High	1967	Employed	High	y	y	1	1	0		22.500	22.5	119.5	1.195	21	30	30	7	45	c	own bed	own bed	20	20	30	30	nothing	nothing	nothing	nothing	0	0								North	Yes
1269	20	489	2015-06-10	2009-06-12	3540	f	1981	Employed	High	1973	Employed	High	y	y	0	1	0		33.400	33.4	121.0	1.21	21	00	0	7	0	y	own bed	own bed	19	19	45	45	nothing	nothing	nothing	nothing	0	0								North	No
1270	20	489	2015-06-10	2009-07-11	2950	m	1982	Works at home	Middle	1979	Employed	Middle	y	y	0	1	0		32.000	32	128.0	1.28	20	30	30	7	30	y	own bed	own bed	19	19	30	30	nothing	nothing	nothing	nothing	2	0								North	Yes
1271	20	489	2015-06-11	2013-06-09	2760	f	1982	Works at home	High	1981	Employed	Middle	y	y	0	0	0		12.400	12.4	89.0	0.89	22	30	30	7	15	y	parents' bed	parents' bed	20	20	0	0	nothing	nothing	nothing	nothing	0	2.5								North	No
1272	9	592	2015-06-04	2009-06-25	3360	m	1979	Employed	University	1976	Employed	University	y	y	0	1	0		20.000	20	112.0	1.12	20	30	30	8	15	c	other room	own bed	19	19	30	30	juice	nothing	nothing	nothing	0	0								North	Yes
1274	9	592	2015-06-04	2012-07-19	2900	m	1979	Employed	University	1976	Employed	University	y	y	1	0	0		14.000	14	93.5	0.935	22	15	15	7	0	c	parents' bed	own bed	19	19	30	30	milk	sweet	nothing	nothing	1	2								North	Yes
1275	9	592	2015-06-16	2009-09-12	3252	f	1973	Unemployed	Middle	1971	Employed	University	y	y	0	0	0		19.000	19	112.0	1.12	22	30	30	9	0	y	own bed	own bed	19	19	30	30	nothing	nothing	nothing	nothing	1	0								North	No
1276	9	484	2015-06-16	2014-05-11	3220	f	1974	Employed	University	1965	Unemployed	High	y	y	0	0	0		7.450	7.45	73.0		23	15	15	7	30	n	parents' bed	parents' bed	20	20	0	0	juice	nothing	nothing	nothing	2	1.25								North	No
1277	9	521	2015-06-16	2010-06-04	4350	m	1988	Employed	Middle	1984	Employed	Middle	y	y	0	0	0		18.000	18	111.0	1.11	21	30	30	7	45	y	own bed	own bed	18	18	45	45	nothing	nothing	nothing	nothing	0	0								North	Yes
1279	9	521	2015-06-16	2012-02-28	3680	f	1982	Employed	University	1975	Employed	High	y	y	1	0	0		15.000	15	94.0	0.94	21	30	30	7	45	c	own bed	own bed	19	19	0	0	nothing	fruit	nothing	nothing	3	1								North	No
1280	9	560	2015-06-16	2014-01-17	1670	f	1975	Employed	University	1974	Employed	High	y	y	0	0	0		8.700	8.7	76.0		24	00	0	8	0	y	other room	own bed	20	20	0	0	milk	fruit	nothing	nothing	1	2								North	No
1281	9	560	2015-06-16	2013-04-24	2800	f	1978	Employed	High	1975	Employed	High	y	y	0	0	0		11.900	11.9	87.0	0.87	21	15	15	7	0	c	own bed	own bed	19	19	30	30	nothing	nothing	nothing	nothing	0	2								North	No
1282	9	512	2015-06-16	2013-02-18	2550	f	1981	Employed	University	1982	Employed	University	y	y	1	0	0		11.900	11.9	86.0	0.86	21	30	30	7	0	c	own bed	own bed	19	19	0	0	milk	nothing	nothing	nothing	0	2								North	No
1283	9	512	2015-06-16	2013-12-24	3240	f	1974	Employed	High	1971	Employed	University	y	y	2	0	0		9.200	9.2	75.5		22	30	30	6	30	n	other room	own bed	20	20	0	0	milk	nothing	milk	nothing	2	2.5								North	No
1284	17	534	2015-06-16	2009-12-23	3200	m	1975	Employed	University	1974	Employed		y	y	2	0	0		16.500	16.5	119.0	1.19	22	00	0	7	0	c	own bed	own bed	19	19	30	30	milk	nothing	nothing	nothing	0	0								North	Yes
1285	17	534	2015-06-16	2011-04-25	4020	m	1973	Employed	University	1967	Employed	Middle	y	y	1	0	0		20.500	20.5	117.0	1.17	21	30	30	7	30	c	own bed	own bed	19	19	0	0	milk	nothing	nothing	nothing	0	0								North	Yes
1286	9	554	2015-06-17	2012-10-28	2660	f	1977	Employed	University	1969	Employed	University	y	y	1	0	0		11.700	11.7	86.5	0.865	21	30	30	6	30	c	other room	own bed	19	19	30	30	milk	nothing	nothing	fruit	0	1.25								North	No
1288	9	560	2015-06-17	2014-01-01	3790	f	1971	Works at home	High	1971	Employed	High	y	y	0	0	0		10.400	10.4	81.0		21	15	15	9	0	y	own bed	own bed	19	19	15	15	milk	nothing	milk	nothing	2	2								North	No
1289	9	560	2015-06-17	2011-06-17	3100	f	1977	Employed	Middle	1974	Employed	Middle	y	y	2	0	0		17.600	17.6	104.0	1.04	21	00	0	7	30	n	parents' bed	parents' bed	19	19	15	15	nothing	nothing	nothing	nothing	3	0								North	No
1290	9	560	2015-06-17	2009-07-23	3200	f	1977	Employed	Middle	1974	Employed	Middle	y	y	1	1	0		16.500	16.5	109.0	1.09	21	00	0	7	30	n	parents' bed	parents' bed	19	19	15	15	nothing	nothing	nothing	nothing	0	0								North	No
1291	9	592	2015-06-16	2009-08-01	3080	m	1981	Employed	High	1975	Employed	University	y	y	1	0	0		20.000	20	115.0	1.15	20	30	30	6	15	y	own bed	own bed	19	19	15	15	nothing	nothing	nothing	nothing	1	0								North	Yes
1292	9	592	2015-06-17	2012-08-20	3065	m	1980	Other	High	1975	Employed	University	y	y	0	0	0		13.300	13.3	91.5	0.915	22	15	15	7	30	y	parents' bed	parents' bed	19	19	15	15	milk & juice	other	nothing	nothing	2	1								North	Yes
1293	9	513	2015-06-17	2009-01-21	2920	m	1976	Employed	High	1975	Employed	High	y	y	0	1	0		20.000	20	116.0	1.16	21	15	15	7	45	c	own bed	own bed	19	19	30	30	nothing	nothing	nothing	nothing	0	0								North	Yes
1294	17	534	2015-06-17	2011-07-21	3110	m	1973	Employed	High	1972	Employed	Middle	y	y	0	1	0		14.000	14	100.0	1	23	00	0	7	0	n	parents' bed	own bed	19	19	45	45	juice	nothing	nothing	nothing	0	1.75								North	Yes
1296	20	489	2015-06-17	2009-05-14	2980	m	1981	Employed	High	1975	Employed	High	y	y	1	1	0		18.800	18.8	113.7	1.137	21	15	15	7	30	c	own bed	own bed	19	19	30	30	nothing	nothing	nothing	nothing	0	0								North	Yes
1297	20	489	2015-06-17	2012-04-03	3150	m	1980	Works at home	Middle	1978	Employed	Middle	y	y	1	0	0		17.000	17	100.5	1.005	21	30	30	8	0	c	own bed	own bed	19	19	0	0	milk	nothing	milk	nothing	2	0								North	Yes
1298	9	513	2015-06-17	2012-04-25	3200	f	1976	Employed	High	1975	Employed	High	y	y	1	0	0		15.000	15	96.0	0.96	21	30	30	7	30	c	own bed	own bed	19	19	30	30	nothing	nothing	nothing	nothing	0	2								North	No
1299	20	489	2015-06-17	2009-09-17	3580	m	1977	Employed	High	1976	Employed	High	y	y	1	0	0		23.000	23	119.0	1.19	21	45	45	7	45	c	own bed	own bed	20	20	15	15	nothing	nothing	nothing	nothing	0	0								North	Yes
1300	15	541	2015-06-09	2005-10-18	2900	f	1983	Works at home	Middle	1982	Employed	Middle	y	y	0	1	0		46.000	46	149.0	1.49	1	30	30	8	30	n	own bed	own bed	20	20	0	0	juice	nothing	nothing	nothing	0	0								South	No
1301	15	541	2015-06-17	2009-08-07	2250	f	1990	Works at home	High	1986	Employed	Middle	y	y	0	0	0		20.000	20	108.0	1.08	22	00	0	8	0	y	parents' bed	parents' bed	20	20	30	30	juice	fruit & sweet	nothing	nothing	2	0								South	No
1302	15	541	2015-06-17	2013-04-23	2900	f	1981	Employed	Middle	1976	Employed	Middle	y	y	1	0	0		11.600	11.6	82.5	0.825	21	00	0	7	30	y	parents' bed	own bed	20	20	0	0	nothing	salted	nothing	nothing	0	0.5								South	No
1304	9	592	2015-06-18	2002-10-28	3640	m	1974	Other	High	1969	Other	High	y	y	1	0	0		69.000	69	154.5	1.545	22	00	0	7	0	y	own bed	own bed	19	19	30	30	nothing	nothing	nothing	nothing	0	0								North	Yes
1305	20	489	2015-06-18	2013-07-07	3690	m	1974	Works at home	High	1974	Employed	High	y	y	1	0	0		19.300	19.3	90.0		22	30	30	7	0	c	parents' bed	own bed	20	20	0	0	juice	nothing	juice	nothing	2	1.5								North	Yes
1306	17	534	2015-06-18	2012-05-07	1320	m	1984	Employed	High	1978	Employed	High	y	y	0	1	0		15.500	15.5	96.0	0.96	22	30	30	7	30	c	own bed	own bed	19	19	15	15	nothing	fruit	nothing	nothing	0	2								North	Yes
1307	9	512	2015-06-18	2012-05-21	3350	m	1978	Employed	University	1983	Employed	High	y	y	0	0	0		14.000	14	93.5	0.935	22	00	0	8	0	na	own bed	own bed	20	20	0	0	nothing	nothing	nothing	nothing	0	2								North	Yes
1308	17	534	2015-06-18	2010-05-06	4150	m	1973	Employed	High	1975	Employed	High	y	y	3	0	0		17.500	17.5	111.0	1.11	19	30	30	7	30	c	other room	own bed	18	18	45	45	nothing	nothing	nothing	nothing	0	2								North	Yes
1309	7	585	2015-06-16	2009-06-20	3100	f	1987	Unemployed	University	1986	Employed	High	y	y	0	1	0		22.350	22.35	118.0	1.18	21	15	15	7	30	c	own bed	own bed	20	20	0	0	nothing	nothing	nothing	nothing	0	0								Center	No
1310	7	585	2015-06-18	2011-12-23	2630	f	1974	Employed	Middle	1976	Employed	High	y	y	0	0	0		18.700	18.7	109.0	1.09	22	30	30	9	0	y	own bed	own bed	20	20	0	0	milk	nothing	nothing	nothing	1	0								Center	No
1312	9	512	2015-06-18	2013-06-18	3050	f	1981	Works at home	High	1973	Employed	High	y	y	1	0	0		12.200	12.2	89.6		22	00	0	7	30	c	own bed	own bed	19	19	45	45	nothing	nothing	nothing	nothing	0	2								North	No
1313	9	512	2015-06-18	2011-06-06	3250	m	1981	Works at home	High	1973	Employed	High	y	y	0	1	0		15.500	15.5	100.0	1	22	00	0	7	0	c	own bed	own bed	19	19	45	45	nothing	nothing	nothing	nothing	1	1.5								North	Yes
1314	20	499	2015-06-18	2011-04-03	2670	f	1970	Employed	Middle	1971	Employed	High	y	y	1	0	0		14.700	14.7	97.5	0.975	21	45	45	8	0	c	parents' bed	own bed	19	19	30	30	nothing	nothing	nothing	nothing	0	0								North	No
1316	9	592	2015-06-18	2011-07-12	1400	m	1983	Works at home	Middle	1978	Employed	High	y	y	2	1	1		15.000	15	98.0	0.98	21	00	0	7	15	c	own bed	own bed	19	19	0	0	nothing	nothing	nothing	nothing	2	0.75								North	Yes
1317	9	592	2015-06-19	2009-09-27	3020	f	1974	Employed	University	1975	Employed	University	y	y	0	1	0		30.000	30	135.0	1.35	22	15	15	8	0	y	own bed	own bed	20	20	0	0	nothing	nothing	nothing	nothing	0	0								North	No
1318	9	521	2015-06-19	2011-06-18	2840	f	1981	Employed	University	1975	Employed	University	y	y	0	1	0		17.000	17	104.0	1.04	21	15	15	7	30	c	own bed	own bed	19	19	15	15	nothing	nothing	nothing	nothing	1	1.25								North	No
1319	17	534	2015-06-19	2009-12-11	4200	f	1983	Employed	High	1980	Employed	Middle	y	y	0	2	0		24.000	24	125.0	1.25	20	45	45	7	30	c	own bed	own bed	19	19	15	15	juice	nothing	nothing	nothing	0	0								North	No
1320	17	534	2015-06-19	2014-01-30	3850	f	1981	Works at home	Middle	1975	Employed	Middle	y	y	1	0	0		9.700	9.7	81.0		21	30	30	8	45	c	parents' bed	own bed	19	19	45	45	milk	nothing	milk	nothing	2	2.5								North	No
1321	9	512	2015-06-19	2010-12-06	3100	m	1981	Employed	University	1979	Employed	University	y	y	0	1	0		17.000	17	104.0	1.04	21	15	15	7	30	c	own bed	own bed	19	19	0	0	nothing	nothing	nothing	nothing	0	0								North	Yes
1322	9	592	2015-06-19	2004-12-19	2940	f	1969	Employed	High	1962	Other	University	y	y	1	0	0		43.000	43	157.0	1.57	21	30	30	8	0	y	own bed	own bed	19	19	15	15	nothing	nothing	nothing	nothing	0	0								North	No
1324	7	585	2015-06-19	2004-01-13	3040	m	1978	Employed	University	1972	Employed	High	y	y	0	1	0		50.300	50.3	144.0	1.44	23	00	0	11	0	c	own bed	own bed	20	20	0	0	nothing	nothing	nothing	nothing	0	0								Center	Yes
1326	9	592	2015-06-23	2006-11-10	1990	f	1967	Works at home	Middle	1964	Unemployed	High	y	y	3	0	0		22.000	22	123.0	1.23	23	30	30	8	30	c	parents' bed	parents' bed	19	19	0	0	nothing	nothing	nothing	nothing	0	0								North	No
1327	9	592	2015-06-23	2011-06-14	3800	m	1984	Employed	University	1983	Employed	High	y	y	0	0	0		20.000	20	111.0	1.11	21	30	30	8	0	y	own bed	own bed	20	20	0	0	nothing	nothing	nothing	nothing	0	0								North	Yes
1328	9	592	2015-06-23	2012-06-30	2710	f	1981	Employed	University	1974	Employed	High	y	y	0	1	0		13.200	13.2	99.0	0.99	21	30	30	8	30	y	parents' bed	own bed	19	19	30	30	nothing	salted	nothing	nothing	0	1.75								North	No
1329	17	534	2015-06-23	2010-11-12	3800	f	1967	Employed	Middle	1968	Employed	Middle	y	y	1	0	0		14.000	14	102.0	1.02	21	30	30	7	0	c	own bed	own bed	19	19	15	15	milk & juice	sweet	nothing	nothing	3	1								North	No
1330	17	534	2015-06-23	2012-06-01	3300	m	1982	Employed	University	1977	Employed	Middle	y	y	0	0	0		14.300	14.3	95.0	0.95	22	30	30	8	0	n	parents' bed	parents' bed	18	18	30	30	nothing	salted	nothing	nothing	0	1.5								North	Yes
1334	4	491	2015-06-23	2014-02-13	3320	m	1978	Employed	University	1976	Employed	University	y	y	1	0	0		10.000	10	77.5		23	00	0	7	45	n	parents' bed	parents' bed	19	19	30	30	milk	nothing	milk	nothing	4	1.5								South	Yes
1335	13	597	2015-06-23	2005-12-28	3200	m	1971	Works at home	High	1967	Employed	High	y	y	1	0	0		40.500	40.5	137.0	1.37	22	15	15	8	0	y	own bed	own bed	20	20	30	30	nothing	nothing	nothing	nothing	0	0								South	Yes
1336	13	597	2015-06-23	2004-01-28	3240	f	1970	Employed	University	1970	Employed	University	y	y	0	1	0		46.500	46.5	144.0	1.44	23	30	30	10	0	y	own bed	own bed	18	18	0	0	nothing	nothing	nothing	nothing	1	0								South	No
1337	20	574	2015-06-24	2011-07-18	3245	m	1982	Employed	High	1971	Employed	Middle	y	y	1	0	0		16.500	16.5	102.5	1.025	22	30	30	7	30	y	own bed	own bed	20	20	0	0	milk	nothing	nothing	nothing	0	0.5								North	Yes
1338	9	592	2015-06-24	2002-07-14	2380	f	1974	Works at home	High	1967	Other	High	y	y	0	1	0		42.000	42	160.0	1.6	24	00	0	8	45	y	own bed	own bed	20	20	0	0	nothing	nothing	nothing	nothing	0	0								North	No
1339	20	574	2015-06-24	2009-09-23	2720	m	1977	Employed	University	1973	Employed	High	y	y	0	1	0		20.000	20	113.0	1.13	21	30	30	7	0	y	own bed	own bed	19	19	30	30	nothing	fruit	nothing	nothing	0	0								North	Yes
1340	13	598	2015-06-23	2009-06-20	2800	f	1990	Unemployed	Middle	1971	Unemployed	Middle	y	y	0	2	0		16.500	16.5	104.0	1.04	22	00	0	7	0	c	own bed	own bed	20	20	0	0	milk	nothing	nothing	nothing	1	0.75								South	No
1341	13	598	2015-06-23	2011-08-19	2900	f	1990	Unemployed	Middle	1971	Unemployed	Middle	y	y	1	1	0		13.000	13	88.5	0.885	22	15	15	7	15	c	own bed	own bed	20	20	0	0	milk	nothing	nothing	nothing	1	0.5								South	No
1342	9	532	2015-06-24	2013-12-04	3000	m	1977	Unemployed	Middle	1974	Employed	High	y	y	0	0	0		10.000	10	77.0		21	15	15	7	0	y	own bed	own bed	20	20	0	0	juice	nothing	juice	nothing	1	2.5								North	Yes
1343	16	548	2015-06-19	2011-11-30	3850	m	1980	Employed	High	1979	Employed	High	y	y	1	0	0		18.300	18.3	101.0	1.01	22	00	0	7	0	c	parents' bed	parents' bed	20	20	0	0	nothing	nothing	nothing	nothing	0	1.5								Center	Yes
1344	9	592	2015-06-24	2002-06-28	3245	f	1967	Unemployed	High	1968	Employed	High	y	y	1	0	0		59.000	59	170.0	1.7	23	30	30	10	15	y	own bed	own bed	19	19	0	0	nothing	nothing	nothing	nothing	1	0								North	No
1345	9	592	2015-06-24	2013-09-06	4260	f	1978	Employed	Middle	1979	Employed	Middle	y	y	0	0	0		11.000	11	80.0		22	30	30	7	0	y	other room	own bed	19	19	45	45	nothing	nothing	nothing	nothing	2	2								North	No
1347	9	558	2015-06-24	2012-03-01	2700	f	1981	Employed	University	1979	Employed	University	y	y	1	0	4		12.800	12.8	90.5	0.905	21	30	30	8	0	y	own bed	own bed	19	19	0	0	milk	nothing	nothing	nothing	1	1								North	No
1348	15	572	2015-06-04	2009-06-08	2850	f	1979	Works at home	High	1978	Employed	High	y	y	1	0	0		23.000	23	120.0	1.2	22	00	0	8	0	y	own bed	own bed	21	21	0	0	nothing	nothing	nothing	nothing	0	1.75								South	No
1349	13	597	2015-06-24	2011-05-10	2985	m	1980	Employed	University	1981	Employed	High	y	y	0	0	0		19.500	19.5	108.0	1.08	22	30	30	7	0	n	own bed	own bed	20	20	0	0	milk	sweet	milk	nothing	2	1.5								South	Yes
1350	13	597	2015-06-24	2011-03-14	3610	f	1983	Unemployed	Middle	1977	Employed	High	y	y	0	1	0		20.500	20.5	113.0	1.13	22	30	30	11	0	y	parents' bed	parents' bed	19	19	0	0	nothing	nothing	nothing	nothing	0	0								South	No
1351	7	585	2015-06-25	2005-04-05	3700	m	1984	Works at home	Middle	1976	Employed	Elementary	y	y	0	1	2		45.000	45	152.0	1.52	21	30	30	5	30	n	own bed	own bed	20	20	0	0	nothing	nothing	nothing	nothing	0	0								Center	Yes
1352	17	534	2015-06-25	2012-01-31	3410	f	1975	Works at home	High	1970	Employed	University	y	y	1	0	0		15.500	15.5	99.0	0.99	20	30	30	7	30	c	other room	own bed	19	19	0	0	juice	nothing	juice	nothing	3	1.75								North	No
1353	7	585	2015-06-25	2008-09-13	3400	m	1981	Employed	University	1976	Employed	University	y	y	0	1	0		22.500	22.5	117.0	1.17	22	00	0	8	0	y	own bed	own bed	19	19	0	0	nothing	nothing	nothing	nothing	1	0								Center	Yes
1354	15	572	2015-05-26	2012-04-07	2890	f	1988	Employed	High	1981	Employed	University	y	y	0	0	0		15.500	15.5	95.0	0.95	22	00	0	7	45	y	parents' bed	own bed	20	20	0	0	nothing	nothing	nothing	nothing	4	2								South	No
1355	15	572	2015-06-05	2011-06-05	3180	f	1980	Employed	University	1978	Employed	High	y	y	2	0	0		17.000	17	100.0	1	21	30	30	8	0	n	other room	own bed	20	20	30	30	nothing	sweet	nothing	nothing	0	2								South	No
1356	15	572	2015-06-05	2014-04-22	2900	m	1982	Unemployed	High	1974	Employed	High	y	y	1	0	0		9.550	9.55	78.0		20	30	30	7	30	y	other room	parents' bed	19	19	30	30	nothing	nothing	nothing	nothing	1	1								South	Yes
1357	15	572	2015-06-05	2011-03-02	3100	m	1976	Employed	University	1978	Employed	University	y	y	0	1	0		16.500	16.5	101.0	1.01	22	00	0	7	15	y	outside home	own bed	19	19	30	30	nothing	nothing	nothing	nothing	1	2								South	Yes
1359	15	572	2015-06-05	2008-10-30	3320	f	1982	Works at home	Middle	1981	Employed	Middle	y	n	1	0	0		35.000	35	120.0	1.2	21	30	30	7	0	c	own bed	own bed	20	20	0	0	nothing	sweet	nothing	nothing	0	1								South	No
1360	15	572	2015-06-05	2008-10-10	3460	m	1976	Works at home	High	1972	Employed	High	y	y	0	1	0		37.300	37.3	126.0	1.26	22	30	30	7	30	y	parents' bed	own bed	20	20	30	30	nothing	nothing	nothing	nothing	2	0								South	Yes
1361	9	592	2015-06-25	2003-01-11	3675	f	1973	Employed	Middle	1977	Employed	Middle	y	y	0	0	0		56.000	56	162.0	1.62	23	30	30	9	30	y	own bed	own bed	19	19	30	30	nothing	nothing	nothing	nothing	1	0								North	No
1362	17	534	2015-06-25	2009-09-21	3950	m	1989	Unemployed	Middle	1987	Employed	Middle	y	n	0	1	0		20.000	20	118.0	1.18	21	00	0	7	30	y	own bed	outside home	19	19	30	30	nothing	nothing	nothing	nothing	0	0								North	Yes
1363	9	592	2015-06-25	2005-05-11	3330	f	1970	Employed	High	1970	Employed	Middle	y	y	1	0	0		54.000	54	152.0	1.52	23	00	0	8	0	y	own bed	own bed	19	19	30	30	nothing	sweet	nothing	nothing	0	0								North	No
1365	9	532	2015-06-25	2003-12-02	3890	m	1976	Employed	Middle	1969	Employed	High	y	y	1	1	0		40.000	40	150.0	1.5	24	00	0	10	30	c	own bed	own bed	19	19	30	30	other	salted	nothing	nothing	0	0								North	Yes
1366	9	532	2015-06-25	2014-05-23	3650	f	1976	Employed	Middle	1969	Employed	High	y	y	2	0	0		10.350	10.35	74.0		22	45	45	5	45	n	parents' bed	own bed	19	19	30	30	milk	nothing	nothing	nothing	0	1								North	No
1368	13	598	2015-06-25	2005-09-14	3750	m	1977	Works at home	Middle	1976	Employed	Middle	y	y	1	1	0		58.000	58	145.0	1.45	22	00	0	7	30	y	own bed	own bed	21	21	0	0	nothing	sweet	nothing	nothing	0	0								South	Yes
1369	13	598	2015-06-25	2012-04-14	3050	f	1983	Unemployed	Middle	1980	Unemployed	Middle	y	y	0	0	0		15.000	15	95.0	0.95	23	30	30	10	0	n	parents' bed	parents' bed	20	20	30	30	milk	sweet	nothing	nothing	2	2								South	No
1370	13	598	2015-06-24	2014-06-20	3680	f	1983	Unemployed	High	1976	Employed	High	y	y	0	0	0		9.300	9.3	75.0		21	30	30	7	45	n	parents' bed	own bed					milk	nothing	nothing	nothing	5	3								South	No
1371	13	598	2015-06-24	2012-05-30	3200	m	1980	Works at home	High				y	y	0	0	0	n	15.000	15	97.0	0.97	22	15	15	8	30	y	own bed	own bed	20	20	15	15	milk	nothing	nothing	nothing	1	0.75								South	Yes
1372	9	559	2015-06-25	2008-06-01	3280	m	1982	Unemployed	Middle	1978	Employed	High	y	y	0	0	0		37.000	37	129.0	1.29	22	30	30	8	30	y	parents' bed	parents' bed	20	20	0	0	nothing	nothing	nothing	nothing	0	0								North	Yes
1373	13	597	2015-06-25	2010-08-15	3400	f	1973	Employed	Middle	1967	Employed	High	y	y	0	0	0		20.500	20.5	113.0	1.13	23	00	0	7	30	y	parents' bed	parents' bed	20	20	0	0	nothing	nothing	nothing	nothing	0	0								South	No
1374	13	597	2015-06-25	2003-11-10	4200	f	1975	Works at home	High	1962	Employed	High	y	y	1	0	0		53.500	53.5	155.0	1.55	1	30	30	7	0	y	other room	other room	21	21	0	0	nothing	sweet	nothing	nothing	0	1.25								South	No
1375	9	511	2015-06-25	2012-03-21	3030	m	1980	Employed	High	1972	Employed	High	y	y	0	0	0		15.500	15.5	99.0	0.99	21	30	30	7	0	y	own bed	own bed	19	19	30	30	milk	nothing	nothing	nothing	0	2.5								North	Yes
1376	17	534	2015-06-24	2009-09-19	3220	m	1973	Employed	High	1974	Employed	High	y	y	1	0	0		18.000	18	112.0	1.12	20	30	30	6	0	c	other room	parents' bed	19	19	0	0	nothing	nothing	nothing	nothing	1	0								North	Yes
1377	17	534	2015-06-26	2013-10-22	3880	m	1986	Employed	High	1978	Employed	High	y	y	1	0	0		12.000	12	86.0		22	00	0	7	30	n	parents' bed	own bed	19	19	45	45	nothing	nothing	nothing	nothing	1	1.5								North	Yes
1378	17	534	2015-06-26	2013-01-07	3380	m	1976	Employed	High	1967	Employed	Middle	y	y	1	1	0		12.500	12.5	90.0	0.9	21	00	0	8	0	c	own bed	parents' bed	19	19	30	30	milk	nothing	nothing	nothing	0	1.5								North	Yes
1379	9	592	2015-06-25	2009-09-15	3320	f	1987	Employed	High	1978	Employed	Middle	y	y	0	1	0		18.000	18	113.0	1.13	22	00	0	9	0	y	own bed	own bed	19	19	0	0	nothing	nothing	nothing	nothing	0	0								North	No
1380	9	592	2015-06-26	2004-02-29	2800	f	1986	Works at home	None	1962	Unemployed	Middle	y	y	0	1	0		31.000	31	137.0	1.37	24	00	0	10	15	y	other room	own bed	21	21	0	0	nothing	sweet	nothing	nothing	0	0								North	No
1382	15	572	2015-05-22	2011-08-03	3470	f	1981	Employed	High	1974	Employed	High	y	y	0	0	0		13.000	13	102.5	1.025	23	00	0	9	0	y	parents' bed	own bed	20	20	30	30	nothing	nothing	nothing	nothing	0	0								South	No
1383	15	572	2015-05-19	2010-01-02	3200	f	1982	Employed	Middle	1980	Unemployed	Middle	y	y	1	0	0		20.000	20	113.0	1.13	23	00	0	7	30	c	own bed	own bed	21	21	0	0	milk	salted	nothing	nothing	0	0								South	No
1384	15	572	2015-05-20	2007-01-26	3550	f	1975	Works at home	High	1974	Employed	High	y	y	1	0	0		43.000	43	134.5	1.345	20	30	30	7	0	c	parents' bed	own bed	19	19	30	30	nothing	nothing	nothing	nothing	0	0								South	No
1385	15	572	2015-05-20	2011-07-23	3330	m	1974	Unemployed	High	1974	Employed	High	y	y	1	0	1		13.500	13.5	96.0	0.96	20	00	0	7	0	y	own bed	own bed	19	19	30	30	nothing	nothing	nothing	nothing	0	0								South	Yes
1386	15	572	2015-05-20	2013-11-15	3350	f	1982	Works at home	Middle	1979	Employed	Middle	y	y	0	0	0		10.300	10.3	80.0		23	15	15	9	30	n	own bed	own bed	22	22	0	0	nothing	nothing	nothing	nothing	2	2								South	No
1387	15	572	2015-05-21	2012-08-18	3040	f	1978	Employed	University	1973	Employed	University	y	y	1	0	0		11.000	11	79.0	0.79	22	00	0	9	0	y	other room	own bed	20	20	30	30	nothing	nothing	nothing	nothing	3	0.75	y							South	No
1388	4	491	2015-06-26	2013-02-23	2960	f	1977	Employed	University	1964	Employed	University	y	y	0	0	3		12.200	12.2	88.5	0.885	22	15	15	9	15	n	parents' bed	parents' bed	20	20	15	15	milk	sweet	nothing	nothing	4	0								South	No
1389	15	572	2015-05-21	2013-04-28	3650	f	1978	Works at home	University	1974	Employed	High	y	y	0	0	0		11.300	11.3	88.0	0.88	23	30	30	9	30	y	other room	own bed	20	20	0	0	milk	nothing	nothing	nothing	1	2								South	No
1390	15	572	2015-05-21	2014-04-08	3420	f	1976	Employed	University	1976	Employed	High	y	y	0	0	0		10.950	10.95	78.0		20	30	30	7	30	n	parents' bed	parents' bed	19	19	0	0	nothing	nothing	nothing	nothing	0	2								South	No
1391	9	560	2015-06-26	2011-10-31	3420	f	1975	Employed	University	1956	Employed	High	y	y	1	0	0		16.000	16	100.5	1.005	20	45	45	7	0	c	other room	parents' bed	19	19	30	30	nothing	nothing	nothing	nothing	0	1								North	No
1392	9	560	2015-06-26	2010-01-14	3380	f	1975	Employed	University	1956	Employed	High	y	y	0	1	0		17.400	17.4	113.0	1.13	21	45	45	7	0	c	other room	own bed	19	19	30	30	nothing	nothing	nothing	nothing	0	0								North	No
1393	10	505	2015-06-26	2013-11-06	3620	f	1976	Employed	High	1973	Employed	Middle	y	y	2	0	0		11.520	11.52	86.0		21	45	45	7	0	n	own bed	own bed	20	20	0	0	milk	nothing	nothing	nothing	0	1.5								Center	No
1394	13	597	2015-06-26	2014-02-01	3450	m	1978	Employed	High	1977	Unemployed	High	y	y	0	0	2		12.500	12.5	82.0		23	00	0	7	45	n	own bed	own bed	20	20	0	0	nothing	nothing	nothing	nothing	0	2								South	Yes
1395	13	597	2015-06-26	2012-11-29	3850	m	1974	Employed	University	1972	Employed	University	y	y	0	0	0		16.500	16.5	98.0	0.98	21	00	0	7	0	y	parents' bed	parents' bed	19	19	30	30	milk	nothing	milk	nothing	2	0.5								South	Yes
1396	9	558	2015-06-26	2012-12-23	3380	f	1970	Employed	High	1970	Employed	High	y	y	0	0	4		13.800	13.8	90.5	0.905	21	30	30	8	0	y	own bed	own bed	19	19	30	30	juice	nothing	nothing	nothing	0	1								North	No
1397	13	598	2015-06-17	2009-12-15	1780	m	1976	Unemployed	High	1970	Other	Middle	y	y	0	0	0		21.000	21	108.0	1.08	22	00	0	8	30	c	own bed	own bed	19	19	30	30	milk	nothing	nothing	nothing	1	0								South	Yes
1398	13	598	2015-06-17	2009-12-15	1928	m	1976	Unemployed	High	1970	Other	Middle	y	y	0	0	0		20.000	20	108.0	1.08	22	00	0	8	30	c	own bed	own bed	19	19	30	30	nothing	nothing	nothing	nothing	0	0								South	Yes
1399	13	598	2015-06-18	2008-11-02	3350	m	1975	Works at home	High				y	y	1	0	0	n	21.000	21	113.0	1.13	24	00	0	10	0	y	own bed	own bed	20	20	0	0	nothing	sweet	nothing	nothing	1	0								South	Yes
1401	13	598	2015-06-05	2011-05-23	3080	m	1985	Works at home	Middle				y	y	1	0	0	n	18.000	18	107.0	1.07	0	30	30	9	0	y	parents' bed	parents' bed	22	22	0	0	nothing	nothing	nothing	nothing	0	0.75								South	Yes
1402	13	598	2015-06-05	2004-06-15	3500	f	1985	Works at home	Middle				y	y	0	1	0	n	75.000	75	160.0	1.6	0	30	30	9	0	y	own bed	own bed	22	22	30	30	nothing	nothing	nothing	nothing	0	0.5								South	No
1403	13	598	2015-06-10	2009-12-12	2850	f	1972	Works at home	High	1970	Other	Middle	y	y	1	0	0		19.000	19	118.0	1.18	22	30	30	8	15	y	own bed	own bed	20	20	0	0	nothing	nothing	nothing	nothing	1	1								South	No
1404	9	592	2015-06-26	2013-05-18	2550	m	1978	Employed	University	1973	Employed	University	y	y	1	0	0		10.300	10.3	82.3	0.823	21	30	30	7	30	c	own bed	own bed	20	20	0	0	nothing	nothing	nothing	nothing	2	2.25								North	Yes
1406	9	592	2015-06-30	2002-01-08	2870	f	1966	Employed	High	1967	Employed	High	y	y	1	0	0		56.500	56.5	164.0	1.64	23	15	15	7	15	c	own bed	own bed	20	20	0	0	nothing	nothing	nothing	nothing	0	0								North	No
1407	9	592	2015-06-30	2006-12-05	2600	f	1969	Employed	High	1969	Employed	Middle	y	y	1	0	0		34.500	34.5	134.5	1.345	21	15	15	8	0	c	own bed	own bed	19	19	0	0	nothing	nothing	nothing	nothing	1	0								North	No
1408	9	592	2015-06-30	2007-10-02	3670	m	1980	Works at home	High	1971	Employed	High	y	y	0	1	0		27.000	27	125.0	1.25	23	00	0	7	0	c	own bed	own bed	20	20	0	0	nothing	nothing	nothing	nothing	0	2								North	Yes
1409	9	592	2015-06-26	2009-05-22	2420	m	1981	Employed	High	1977	Employed	Middle	y	y	0	1	0		20.000	20	112.0	1.12	21	45	45	8	0	c	parents' bed	parents' bed	20	20	0	0	nothing	fruit & sweet	nothing	nothing	1	0								North	Yes
1410	9	592	2015-06-26	2009-05-22	2420	m	1981	Employed	High	1977	Employed	High	y	y	0	1	0		20.000	20	112.0	1.12	21	45	45	8	0	c	parents' bed	parents' bed	20	20	0	0	nothing	fruit & sweet	nothing	nothing	1	0								North	Yes
1411	4	491	2015-06-30	2012-12-28	3390	m	1976	Employed	High	1974	Employed	High	y	y	2	0	0		9.990	9.99	82.5	0.825	21	30	30	7	30	n	other room	own bed	20	20	15	15	nothing	fruit & salted	milk	nothing	4	1.25								South	Yes
1412	17	534	2015-06-30	2009-06-25	3500	m	1983	Employed	High	1979	Employed	Middle	y	y	2	0	0		20.000	20	117.0	1.17	21	00	0	7	0	c	own bed	own bed	19	19	15	15	nothing	nothing	nothing	nothing	0	0								North	Yes
1413	9	592	2015-06-30	2002-02-15	3130	f	1975	Works at home	High	1970	Employed	Middle	y	y	0	0	0		52.000	52	164.0	1.64	23	30	30	8	30	y	own bed	own bed	20	20	15	15	nothing	nothing	nothing	nothing	1	0								North	No
1414	9	511	2015-06-30	2012-11-19	2650	m	1976	Employed	High	1972	Employed	Middle	y	y	0	0	0		12.100	12.1	87.5	0.875	21	30	30	7	0	y	other room	own bed	19	19	30	30	milk	nothing	nothing	nothing	2	1.5								North	Yes
1415	4	491	2015-06-30	2013-08-23	2500	m	1974	Works at home	Middle	1972	Employed	High	y	y	2	0	0		12.370	12.37	91.5		22	00	0	7	45	n	own bed	parents' bed	19	19	30	30	milk	nothing	nothing	nothing	0	1.25								South	Yes
1416	9	511	2015-06-30	2009-02-27	2100	m	1978	Employed	High	1975	Employed	High	y	y	2	0	0		24.000	24	119.0	1.19	22	30	30	8	0	c	own bed	own bed	20	20	0	0	nothing	nothing	nothing	nothing	0	1.5								North	Yes
1417	9	592	2015-06-30	2012-12-14	3460	m	1979	Employed	High	1977	Employed	High	y	y	0	1	0		18.000	18	95.0	0.95	23	30	30	8	0	c	parents' bed	own bed	19	19	30	30	nothing	nothing	nothing	nothing	2	2								North	Yes
1418	13	598	2015-06-05	2009-12-12	2850	f	1972	Works at home	High	1970	Other	Middle	y	y	1	0	0		19.000	19	118.0	1.18	22	30	30	8	15	y	own bed	own bed	20	20	0	0	nothing	nothing	nothing	nothing	0	1								South	No
1419	13	598	2015-06-04	2004-05-17	2800	f	1972	Works at home	High	1970	Other	Middle	y	y	0	1	0		39.000	39	145.0	1.45	22	30	30	8	15	y	own bed	own bed	20	20	0	0	nothing	nothing	nothing	nothing	0	1								South	No
1420	13	598	2015-06-23	2008-05-12	2460	m	1974	Works at home	High	1969	Other	Middle	y	y	0	1	0		27.000	27	130.0	1.3	23	00	0	8	30	c	other room	own bed	20	20	0	0	nothing	nothing	nothing	nothing	0	1								South	Yes
1421	13	598	2015-06-09	2011-01-27	3160	f	1974	Works at home	High	1969	Other	Middle	y	y	1	0	0		17.000	17	110.0	1.1	23	00	0	8	30	c	other room	own bed	20	20	0	0	nothing	nothing	nothing	nothing	1	1								South	No
1422	13	598	2015-06-30	2013-12-31	3650	m	1976	Works at home	High				y	y	1	0	0	n	15.150	15.15	87.0		22	00	0	7	15	n	parents' bed	parents' bed	20	20	30	30	milk	nothing	nothing	nothing	2	0.75								South	Yes
1423	13	598	2015-05-29	2013-12-19	3450	f	1986	Other	High				y	y	0	0	0	n	11.150	11.15	76.0		22	30	30	7	0	y	parents' bed	own bed	20	20	45	45	milk	nothing	nothing	nothing	1	0.5								South	No
1424	13	598	2015-06-30	2013-05-15	3430	m	1982	Other	High				y	y	0	0	0	n	15.000	15	92.0	0.92	23	00	0	7	30	y	parents' bed	own bed	20	20	30	30	milk	nothing	nothing	nothing	2	0.5								South	Yes
1425	13	597	2015-06-30	2012-12-17	2700	f	1974	Unemployed	High	1977	Employed	High	y	y	0	0	0		17.800	17.8	99.0	0.99	22	30	30	8	0	y	own bed	own bed	19	19	30	30	milk	nothing	milk	nothing	2	1.5								South	No
1426	13	597	2015-06-30	2008-12-19	2700	f	1975	Employed	University	1976	Employed	University	y	y	0	0	0		24.300	24.3	124.0	1.24	22	00	0	7	30	y	other room	other room	20	20	0	0	milk	nothing	nothing	nothing	0	0								South	No
1427	15	541	2015-06-26	2014-02-27	3140	f	1985	Works at home	High	1979	Employed	Middle	y	y	1	0	0		9.950	9.95	76.5		24	00	0	6	30	n	other room	own bed	21	21	30	30	nothing	other	nothing	nothing	0	0.75								South	No
1428	15	541	2015-06-26	2010-11-27	3240	f	1983	Works at home	High	1979	Employed	High	y	y	0	0	0		20.000	20	110.0	1.1	21	15	15	7	0	y	parents' bed	parents' bed	20	20	0	0	nothing	salted	nothing	nothing	0	0								South	No
1429	15	541	2015-06-26	2009-10-02	3380	m	1975	Employed	High	1978	Employed	High	y	y	0	0	0		17.500	17.5	104.0	1.04	23	30	30	5	45	y	own bed	own bed	20	20	30	30	nothing	nothing	nothing	nothing	0	0								South	Yes
1430	15	541	2015-06-30	2010-10-02	2600	m	1976	Works at home	University	1974	Employed	High	y	y	1	0	0		16.000	16	101.0	1.01	22	30	30	9	15	n	own bed	own bed	21	21	0	0	juice	nothing	nothing	nothing	0	0								South	Yes
1432	15	541	2015-06-30	2011-06-28	1570	m	1975	Works at home	High	1970	Employed	High	y	y	0	1	0		16.500	16.5	105.0	1.05	23	30	30	9	30	y	parents' bed	parents' bed	20	20	0	0	milk	nothing	nothing	nothing	0	0.75								South	Yes
1433	15	541	2015-06-30	2012-07-20	3330	f	1978	Employed	High	1978	Employed	High	y	y	0	0	0		14.000	14	90.0	0.9	23	00	0	7	45	n	own bed	own bed	20	20	45	45	nothing	nothing	nothing	nothing	0	1.25								South	No
1434	15	541	2015-06-30	2010-04-16	3540	f	1975	Works at home	University	1975	Employed	University	y	y	0	1	0		19.000	19	107.0	1.07	23	30	30	8	30	c	own bed	own bed	19	19	45	45	nothing	nothing	nothing	nothing	0	0.25								South	No
1435	15	541	2015-06-30	2009-09-17	4000	m	1981	Employed	High	1977	Employed	Middle	y	y	0	1	0		26.500	26.5	123.0	1.23	24	00	0	9	30	n	own bed	own bed	20	20	0	0	nothing	nothing	nothing	nothing	0	0								South	Yes
1441	16	545	2015-09-10	2002-05-29	3890	m	1970	Employed	University	1967	Employed	University	y	y	0	1	0		44.500	44.5	158.0	1.58	24	00	0	8	0	c	own bed		20	20	0	0	milk	nothing	nothing		2	0								Center	Yes
1443	16	545	2015-09-11	2010-12-13	3080	f	1975	Employed	University	1972	Employed	University	y	y	2	0	0		17.000	17	111.0	1.11	21	30	30	8	0	y	own bed	own bed	19	19	30	30				nothing	5	0	y							Center	No
1446	9	554	2015-09-15	2010-09-04	4100	m	1972	Employed	High	1969	Employed	University	y	y	1	0	0		24.300	24.3	118.0	1.18	21	30	30	7	15	c	own bed	own bed	19	19	30	30	nothing	sweet	nothing	nothing	0	0								North	Yes
1447	9	554	2015-09-15	2008-12-01	3200	m	1967	Works at home	High	1967	Employed	High	y	y	1	0	0		21.000	21	118.2	1.182	22	00	0	7	0	c	parents' bed	own bed	19	19	30	30	nothing	nothing	nothing	nothing	0	0								North	Yes
1448	9	554	2015-09-15	2006-06-04	3020	m	1967	Works at home	High	1967	Employed	High	y	y	0	1	0		26.800	26.8	131.0	1.31	22	00	0	7	0	c	parents' bed	parents' bed	19	19	30	30	nothing	nothing	nothing	nothing	0	0								North	Yes
1449	9	518	2015-09-16	2006-08-24	3740	m	1975	Works at home	University	1975	Employed	High	y	y	1	1	0		31.500	31.5	134.5	1.345	22	30	30	7	45	y	own bed	parents' bed	20	20	0	0	nothing	nothing	nothing	nothing	1	0								North	Yes
1450	9	518	2015-09-16	2006-05-24	3250	m	1969	Employed	High	1963	Employed	Middle	y	y	1	0	0		44.300	44.3	137.5	1.375	22	00	0	7	30	y	own bed	own bed	19	19	0	0	nothing	fruit	nothing	nothing	1	0								North	Yes
1451	10	505	2015-09-16	2009-09-15	2770	f	1968	Unemployed	High	1966	Employed	High	y	y	0	0	0		18.000	18	112.8	1.128	21	45	45	6	45	y	parents' bed	own bed	19	19	45	45	nothing	nothing	nothing	nothing	0	0								Center	No
1452	10	505	2015-09-16	2009-05-28	3500	f	1973	Employed	University	1984	Employed	University	y	n	0	0	0		22.700	22.7	118.8	1.188	22	00	0	7	15	y	own bed	own bed	20	20	30	30	juice	nothing	nothing	nothing	0	0								Center	No
1454	10	505	2015-09-17	2014-02-24	3320	m	1980	Employed	High	1977	Employed	Middle	y	y	0	0	0		11.400	11.4	86.0		22	15	15	7	15	y	own bed	own bed	19	19	30	30	nothing	nothing	nothing	nothing	0	2.5								Center	Yes
1455	10	505	2015-09-17	2014-02-24	2650	f	1980	Employed	High	1977	Employed	Middle	y	y	0	0	0		11.370	11.37	86.0		22	15	15	7	15	c	own bed	own bed	19	19	30	30	nothing	nothing	nothing	nothing	0	2.5								Center	No
1456	9	553	2015-09-17	2009-07-01	3000	f	1973	Works at home	High	1971	Employed	High	y	y	0	1	0		22.500	22.5	121.1	1.211	22	00	0	7	0	n	parents' bed	parents' bed	19	19	30	30	juice	nothing	nothing	nothing	1	0								North	No
1457	9	553	2015-09-17	2013-09-17	3000	m	1973	Works at home	High	1971	Employed	High	y	y	1	0	0		11.600	11.6	85.0		21	30	30	7	15	n	parents' bed	parents' bed	19	19	30	30	juice	nothing	nothing	nothing	0	2								North	Yes
1458	9	514	2015-09-18	2010-09-30	3410	f	1972	Works at home	High	1973	Employed	University	y	y	0	0	2		22.500	22.5	114.0	1.14	21	45	45	7	30	y	own bed	own bed	18	18	30	30	nothing	nothing	nothing	nothing	0	0								North	No
1459	9	518	2015-09-18	2011-04-17	2990	f	1974	Employed	High	1972	Employed	High	y	y	1	0	0		14.000	14	104.0	1.04	22	00	0	7	15	y	own bed	own bed	19	19	30	30	nothing	nothing	nothing	nothing	1	0								North	No
1460	17	534	2015-09-22	2005-12-22	2700	f	1976	Works at home	High	1973	Employed	Middle	y	y	0	1	0		38.000	38	149.0	1.49	22	00	0	6	45	n	own bed	own bed	19	19	15	15	juice	nothing	nothing	nothing	0	0								North	No
1461	9	558	2015-09-22	2010-01-24	2860	m	1978	Employed	High	1977	Employed	Middle	y	y	0	1	4		16.100	16.1	111.5	1.115	21	30	30	7	0	y	own bed	own bed	20	20	0	0	nothing	nothing	nothing	nothing	1	0								North	Yes
1462	17	534	2015-09-22	2007-01-08	3500	m	1978	Employed	High	1981	Employed	High	y	y	1	1	0		26.000	26	140.0	1.4	21	00	0	7	0	c	parents' bed	own bed	19	19	30	30	nothing	nothing	nothing	nothing	0	0								North	Yes
1463	9	511	2015-09-22	2009-07-31	4100	m	1977	Employed	Middle	1982	Employed	High	y	y	0	1	0		27.500	27.5	126.5	1.265	21	30	30	7	30	y	own bed	own bed	19	19	30	30	nothing	nothing	nothing	nothing	0	0								North	Yes
1464	9	511	2015-09-22	2005-11-09	3980	m	1974	Works at home	High	1974	Employed	High	y	y	1	1	0		50.500	50.5	156.0	1.56	22	30	30	7	0	c	own bed	own bed	19	19	15	15	nothing	nothing	nothing	nothing	1	0								North	Yes
1465	20	499	2015-09-22	2004-08-24	2905	m	1980	Works at home	High	1980	Employed	High	y	y	0	1	0		38.800	38.8	142.0	1.42	21	00	0	6	45	c	own bed	own bed	19	19	30	30	nothing	sweet	nothing	nothing	0	0								North	Yes
1466	17	534	2015-09-23	2008-11-20	3200	m	1978	Employed	High	1981	Employed	High	y	y	2	0	0		24.000	24	120.0	1.2	21	30	30	7	0	c	own bed	own bed	19	19	30	30	nothing	nothing	nothing	nothing	0	0								North	Yes
1467	17	534	2015-09-23	2008-01-30	3720	f	1971	Unemployed	High	1962	Employed	High	y	y	0	1	0		23.000	23	125.0	1.25	21	30	30	7	0	c	own bed	own bed	19	19	15	15	nothing	nothing	nothing	nothing	0	0								North	No
1469	9	592	2015-09-23	2003-04-13	3500	f	1973	Employed	High	1966	Employed	Middle	y	y	1	0	0		48.000	48	165.0	1.65	22	45	45	7	0	y	own bed	own bed	20	20	0	0	nothing	fruit	nothing	nothing	0	0								North	No
1470	20	499	2015-09-23	2008-04-30	3760	f	1981	Employed	High	1980	Employed	High	y	y	0	1	0		28.700	28.7	127.0	1.27	21	15	15	6	45	c	parents' bed	own bed	19	19	30	30	nothing	nothing	nothing	nothing	0	0								North	No
1471	20	499	2015-09-23	2006-01-30	3780	m	1977	Employed	High	1977	Employed	Middle	y	y	0	0	0		27.500	27.5	137.0	1.37	21	30	30	7	15	y	own bed	own bed	19	19	45	45	nothing	nothing	nothing	nothing	0	0								North	Yes
1472	10	505	2015-09-23	2009-09-04	3060	f	1973	Employed	University	1974	Employed	High	y	y	1	0	0		20.900	20.9	123.0	1.23	21	45	45	7	0	c	parents' bed	own bed	20	20	0	0	juice	nothing	nothing	nothing	0	0								Center	No
1473	10	505	2015-09-23	2009-08-30	3650	m	1973	Employed	Middle	1971	Employed	Middle	y	y	0	0	0		22.800	22.8	121.7	1.217	21	30	30	7	0	y	parents' bed	parents' bed	19	19	45	45	milk	nothing	nothing	nothing	1	2								Center	Yes
1474	4	491	2015-09-23	2012-06-27	2990	f	1984	Employed	High	1981	Employed	Middle	y	y	0	0	0		15.500	15.5	99.3	0.993	22	00	0	7	0	n	parents' bed	parents' bed	19	19	0	0	milk	nothing	nothing	nothing	0	3								South	No
1475	20	499	2015-09-23	2004-02-06	3330	m	1966	Employed	High	1966	Employed	High	y	y	1	0	0		32.000	32	143.5	1.435	22	30	30	7	0	y	own bed	own bed	20	20	15	15	nothing	sweet	nothing	nothing	0	0								North	Yes
1476	10	505	2015-09-24	2011-09-09	3200	f	1976	Employed	High	1975	Employed	High	y	y	1	0	0		15.000	15	99.0	0.99	22	00	0	7	30	c	own bed	own bed	20	20	0	0	nothing	nothing	nothing	nothing	1	2								Center	No
1477	9	592	2015-09-24	2001-12-13	3250	f	1966	Works at home	Middle	1970	Employed	High	y	y	0	1	0		40.000	40	158.0	1.58	23	00	0	6	0	y	own bed	own bed	20	20	0	0	nothing	nothing	nothing	nothing	0	0.75					y			North	No
1478	20	499	2015-09-24	2003-12-23	3800	m	1967	Employed	Middle	1964	Employed	Middle	y	y	1	0	0		40.400	40.4	147.0	1.47	21	30	30	7	0	y	other room	own bed	20	20	0	0	nothing	nothing	nothing	nothing	0	0								North	Yes
1479	9	558	2015-09-24	2014-02-22	2930	m	1975	Unemployed	Middle	1973	Employed	High	y	y	1	0	2		11.900	11.9	81.0		21	30	30	8	0	c	own bed	own bed	19	19	30	30	nothing	fruit	nothing	nothing	1	0.75								North	Yes
1480	20	499	2015-09-24	2003-09-10	3360	f	1976	Employed	High	1971	Employed	Middle	y	y	1	2	0		43.400	43.4	160.0	1.6	23	30	30	7	15	c	own bed	own bed	21	21	15	15	nothing	nothing	nothing	nothing	0	0								North	No
1481	17	534	2015-09-24	2006-09-19	2340	f	1975	Employed	High	1973	Employed	University	y	y	0	2	0		34.500	34.5	131.0	1.31	21	00	0	7	0	y	own bed	own bed	19	19	0	0	nothing	nothing	nothing	nothing	0	0								North	No
1482	17	534	2015-09-24	2006-04-30	3150	f	1977	Employed	High	1971	Employed	University	y	y	0	1	0		33.000	33	137.0	1.37	21	30	30	6	45	c	own bed	own bed	19	19	0	0	nothing	nothing	nothing	nothing	0	0								North	No
1483	17	534	2015-09-25	2007-10-31	3620	f	1978	Works at home	High	1970	Employed	High	y	y	1	1	0		34.000	34	133.0	1.33	21	30	30	7	15	c	own bed	own bed	19	19	45	45	nothing	nothing	nothing	nothing	0	0								North	No
1484	20	574	2015-09-29	2013-09-26	2700	f	1981	Employed	University	1978	Employed	University	y	y	0	0	0		12.000	12	87.0	0.87	21	30	30	8	30	y	own bed	own bed	19	19	30	30	milk	nothing	nothing	nothing	1	2								North	No
1485	20	574	2015-09-29	2007-03-08	2100	m	1970	Works at home	High	1978	Employed	High	y	y	1	0	0		37.000	37	131.0	1.31	23	00	0	7	0	y	parents' bed	parents' bed	20	20	0	0	milk & juice	nothing	nothing	nothing	0	0								North	Yes
1486	17	534	2015-09-29	2011-07-06	3700	f	1975	Works at home	Middle	1970	Employed	Middle	y	y	2	0	0		22.000	22	105.0	1.05	21	00	0	7	30	y	parents' bed	parents' bed	18	18	30	30	juice	sweet	juice	nothing	3	2								North	No
1487	7	585	2015-09-29	2005-08-15	2830	m	1970	Works at home	Middle	1967	Employed	Middle	y	y	0	0	0		30.800	30.8	134.0	1.34	21	45	45	7	0	y	own bed	own bed	19	19	30	30	milk & juice	nothing	nothing	nothing	0	0								Center	Yes
1488	17	534	2015-09-29	2007-08-27	3400	f	1978	Employed	High	1977	Employed	High	y	y	0	2	0		23.000	23	125.0	1.25	20	30	30	6	45	c	own bed	own bed	19	19	0	0	nothing	nothing	nothing		0	0								North	No
1489	9	558	2015-09-29	2012-10-03	2850	m	1975	Employed	High	1974	Employed	High	y	y	0	0	4		15.500	15.5	96.0	0.96	21	30	30	7	0	y	own bed	own bed	19	19	30	30	milk	nothing	nothing	nothing	1	0.5								North	Yes
1490	20	499	2015-09-29	2004-08-07	3200	m	1973	Employed	Middle	1964	Employed	University	y	y	0	0	0		31.600	31.6	141.0	1.41	21	45	45	7	15	y	own bed	own bed	19	19	0	0	nothing	nothing	nothing	nothing	0	0								North	Yes
1492	17	534	2015-09-30	2009-07-24	3250	f	1978	Employed	High	1977	Employed	High	y	y	1	1	0		20.000	20	115.0	1.15	21	00	0	7	0	c	own bed	parents' bed	19	19	30	30	nothing	nothing	nothing	nothing	2	0								North	No
1493	17	534	2015-09-30	2003-02-10	3560	m	1968	Employed	High	1965	Employed	High	y	y	1	0	0		39.000	39	156.0	1.56	21	30	30	7	0	y	own bed	own bed	19	19	30	30	milk	nothing	nothing	nothing	0	0								North	Yes
1494	20	575	2015-09-30	2005-07-04	3040	m	1969	Employed	High	1968	Employed	Middle	y	y	1	0	0		33.500	33.5	138.0	1.38	22	30	30	6	45	c	own bed	own bed	19	19	0	0	other	nothing	nothing	nothing	2	0								North	Yes
1497	9	518	2015-09-30	2010-12-30	2830	f	1975	Employed	University	1970	Employed	High	y	y	0	0	0		16.200	16.2	104.0	1.04	21	00	0	7	45	y	other room	parents' bed	19	19	15	15	nothing	sweet	nothing	nothing	3	0								North	No
1499	9	592	2015-09-30	2004-07-09	3970	m	1976	Employed	High	1972	Employed	High	y	y	0	1	0		43.000	43	150.0	1.5	22	00	0	7	0	y	own bed	own bed	19	19	30	30	nothing	nothing	nothing	nothing	0	0								North	Yes
1500	7	585	2015-10-01	2013-12-06	3240	f	1974	Unemployed	High	1976	Employed	High	y	y	0	0	0		12.250	12.25	97.0		22	00	0	8	0	y	own bed	own bed	19	19	30	30	milk	nothing	nothing	nothing	0	1.5								Center	No
1501	7	585	2015-10-01	2010-06-10	2120	f	1975	Works at home	High	1975	Employed	High	y	y	0	0	0		22.200	22.2	118.0	1.18	24	00	0	7	15	y	parents' bed	own bed	20	20	30	30	nothing	nothing	nothing	nothing	2	0								Center	No
1502	9	511	2015-10-01	2004-06-27	3560	m	1969	Works at home	High	1969	Employed	University	y	y	0	1	0		40.500	40.5	148.0	1.48	22	00	0	6	45	y	own bed	own bed	20	20	0	0	nothing	nothing	nothing	nothing	0	0								North	Yes
1503	17	534	2015-10-01	2008-04-17	3360	m	1985	Employed	High	1983	Employed	High	y	y	0	0	0		22.500	22.5	126.0	1.26	21	15	15	6	30	y	parents' bed	parents' bed	20	20	0	0	milk	nothing	nothing	nothing	0	0								North	Yes
1504	17	534	2015-10-01	2008-05-18	3100	m	1974	Unemployed	High	1974	Employed	High	y	y	0	1	0		22.000	22	121.0	1.21	21	00	0	7	15	c	own bed	own bed	19	19	15	15	nothing	nothing	nothing	nothing	0	0								North	Yes
1505	20	571	2015-10-02	2008-04-24	3850	m	1973	Employed	Middle	1974	Employed	High	y	y	1	0	0		29.000	29	130.0	1.3	21	00	0	7	0	c	other room	parents' bed	19	19	30	30	nothing	nothing	nothing	nothing	0	0								North	Yes
1506	20	571	2015-10-02	2009-12-17	3280	m	1978	Student	High	1972	Employed	University	y	y	1	0	0		23.000	23	118.0	1.18	21	30	30	7	0	c	own bed	own bed	20	20	0	0	nothing	nothing	nothing	nothing	1	0								North	Yes
1507	9	511	2015-10-02	2005-03-14	3010	f	1974	Employed	High	1967	Employed	High	y	y	0	1	0		25.000	25	134.5	1.345	22	00	0	7	15	c	own bed	own bed	19	19	15	15	nothing	nothing	nothing	nothing	1	0								North	No
1508	4	491	2015-10-02	2004-07-01	2500	m	1968	Employed	University	1965	Employed	University	y	y	0	0	0		40.500	40.5	150.0	1.5	22	30	30	6	45	y	own bed	own bed	20	20	30	30	nothing	nothing	nothing	nothing	0	0								South	Yes
1509	20	574	2015-10-02	2009-04-09	2750	f	1978	Works at home	Middle	1973	Employed	Middle	y	y	0	1	0		21.200	21.2	118.0	1.18	21	00	0	6	45	c	own bed	own bed	19	19	0	0	milk	nothing	nothing	nothing	0	0								North	No
1510	20	574	2015-10-02	2009-05-15	4130	m	1988	Unemployed	Middle	1983	Employed	Middle	y	y	0	0	2		23.800	23.8	125.0	1.25	21	30	30	7	0	n	parents' bed	parents' bed	19	19	0	0	nothing	sweet	nothing	nothing	2	0								North	Yes
1511	9	518	2015-10-02	2005-06-25	3040	f	1965	Employed	University	1966	Employed	High	y	y	0	1	0		25.500	25.5	137.5	1.375	22	30	30	7	45	y	own bed	own bed	20	20	15	15	nothing	nothing	nothing	nothing	0	0								North	No
1512	7	585	2015-10-02	2014-03-26	3760	f	1982	Employed	University	1962	Employed	High	y	y	0	0	0		12.950	12.95	85.0		21	30	30	7	30	y	parents' bed	parents' bed	19	19	45	45	nothing	nothing	nothing	nothing	1	2.5								Center	No
1513	9	518	2015-10-02	2001-12-19	2050	f	1974	Employed	Middle	1968	Employed	Elementary	y	y	0	1	0		35.500	35.5	154.0	1.54	23	00	0	7	15	y	own bed	own bed	20	20	30	30	nothing	nothing	nothing	nothing	1	0								North	No
1514	7	585	2015-10-02	2014-08-21	3970	f	1995	Works at home	High	1992	Employed	High	y	y	0	0	3		12.600	12.6	85.0		21	15	15	7	30	n	own bed	own bed	19	19	30	30	nothing	nothing	nothing	nothing	0	3								Center	No
1515	17	534	2015-10-02	2008-08-12	3400	f	1984	Works at home	High	1982	Employed	High	y	y	0	1	1		32.000	32	123.0	1.23	22	00	0	6	30	y	own bed	own bed	19	19	30	30	juice	nothing	nothing	nothing	0	0								North	No
1516	17	534	2015-10-02	2006-02-11	2518	f	1973	Employed	High	1961	Employed	High	y	y	0	0	0		30.000	30	150.0	1.5	21	30	30	7	15	y	own bed	own bed	19	19	15	15	nothing	sweet	nothing	nothing	0	0								North	No
1517	9	554	2015-10-06	2009-05-24	3650	f	1973	Employed	High	1956	Employed	University	y	y	1	0	0		25.300	25.3	120.2	1.202	22	15	15	7	0	c	parents' bed	parents' bed	19	19	30	30	nothing	nothing	nothing	nothing	0	0								North	No
1518	10	505	2015-10-06	2011-10-03	3900	m	1980	Employed	High	1971	Employed	Middle	y	y	1	0	0		15.300	15.3	101.3	1.013	23	00	0	7	0	c	own bed	own bed	19	19	30	30	juice	nothing	nothing	nothing	0	0								Center	Yes
1519	10	505	2015-10-06	2003-01-08	3020	m	1969	Employed	High	1965	Employed	High	y	y	1	0	0		44.300	44.3	157.5	1.575	22	00	0	7	0	y	own bed	own bed	20	20	15	15	nothing	nothing	nothing	nothing	0	0								Center	Yes
1520	17	534	2015-10-06	2006-07-03	3250	m	1974	Works at home	High	1952	Employed	Middle	y	y	0	0	0		32.000	32	140.0	1.4	21	00	0	7	0	y	own bed	own bed	19	19	0	0	nothing	nothing	nothing	nothing	0	0								North	Yes
1521	17	534	2015-10-06	2002-03-07	3280	m	1971	Employed	High	1969	Employed	High	y	y	1	1	1		65.000	65	173.0	1.73	22	00	0	7	0	y	own bed	own bed	19	19	30	30	nothing	sweet	nothing	nothing	0	0								North	Yes
1523	9	558	2015-10-07	2011-05-25	3600	f	1974	Employed	High	1975	Employed	High	y	y	0	0	4		19.000	19	107.0	1.07	22	30	30	7	30	y	parents' bed	parents' bed	19	19	30	30	milk	nothing	nothing	nothing	2	0.5								North	No
1524	17	534	2015-10-07	2008-07-02	3360	m	1968	Employed	High	1962	Employed	Middle	y	y	1	0	0		26.000	26	123.0	1.23	21	30	30	7	15	c	own bed	own bed	19	19	45	45	milk	nothing	nothing	nothing	0	0								North	Yes
1525	17	534	2015-10-07	2006-06-09	3280	m	1970	Employed	High	1971	Employed	University	y	y	1	0	0		30.000	30	138.0	1.38	22	00	0	7	15	y	own bed	own bed	19	19	30	30	nothing	sweet	nothing	nothing	0	0								North	Yes
1527	10	505	2015-10-07	2009-07-30	3900	f	1973	Works at home	High	1973	Employed	Middle	y	y	0	0	0		35.100	35.1	126.5	1.265	22	30	30	7	0	y	parents' bed	parents' bed	19	19	30	30	juice	nothing	nothing	nothing	0	2								Center	No
1528	20	574	2015-10-08	2007-12-03	3420	f	1974	Employed	Middle	1968	Employed	High	y	y	0	0	0		35.000	35	132.5	1.325	21	00	0	6	45	y	own bed	own bed	19	19	30	30	nothing	nothing	nothing	nothing	1	0								North	No
1529	16	548	2015-10-08	2010-12-16	2680	m	1984	Employed	High	1982	Employed	High	y	y	0	1	0		16.200	16.2	105.5	1.055	23	00	0	8	0	y	own bed	parents' bed	20	20	0	0	nothing	nothing	nothing	nothing	1	0								Center	Yes
1530	16	548	2015-10-07	2008-12-02	3460	f	1972	Employed	University	1966	Employed	High	y	y	0	0	0		26.400	26.4	120.0	1.2	21	00	0	7	0	y	own bed	own bed	19	19	30	30	nothing	nothing	nothing	nothing	0	0								Center	No
1531	9	511	2015-10-08	2005-08-20	2880	f	1973	Employed	High	1966	Employed	High	y	y	1	0	0		33.500	33.5	149.5	1.495	22	30	30	7	30	c	own bed	own bed	19	19	30	30	nothing	nothing	nothing	nothing	0	0								North	No
1532	17	534	2015-10-08	2008-04-10	3650	f	1986	Employed	High	1977	Employed	High	y	y	0	2	0		25.000	25	120.0	1.2	21	30	30	7	30	c	own bed	own bed	20	20	0	0	nothing	fruit	nothing	nothing	0	0								North	No
1533	17	534	2015-10-09	2014-04-28	3385	f	1976	Employed	University	1978	Employed	University	y	y	0	0	0		11.000	11	83.0		21	30	30	8	0	y	parents' bed	own bed	19	19	0	0	nothing	nothing	nothing	nothing	1	1.75								North	No
1534	10	505	2015-10-09	2006-02-08	3110	m	1969	Employed	University	1967	Employed	High	y	y	0	1	0		25.800	25.8	128.9	1.289	22	30	30	7	15	c	own bed	own bed	20	20	15	15	juice	nothing	nothing	nothing	0	0								Center	Yes
1535	13	606	2015-10-09	2014-09-07	3370	f	1981	Works at home	Middle	1979	Employed	High	y	y	2	0	0		9.550	9.55	73.0		22	30	30	9	45	c	parents' bed	own bed	19	19	30	30	milk	other	milk	nothing	3	2								South	No
1536	20	487	2015-10-09	2010-08-17	3950	m	1974	Employed	High	1968	Employed	High	y	y	1	2	0		24.000	24	110.0	1.1	22	00	0	7	0	n	own bed	own bed	20	20	0	0	nothing	nothing	nothing	nothing	0	0.5								North	Yes
1538	20	487	2015-10-09	2012-03-28	3670	m	1978	Employed	High	1983	Employed	High	y	y	1	0	0		14.600	14.6	99.0	0.99	20	45	45	7	15	y	own bed	own bed	19	19	15	15	juice	nothing	nothing	nothing	1	1								North	Yes
1539	16	545	2015-10-13	2013-09-17	3050	f	1977	Employed	University	1971	Employed	University	y	y	0	0	0		11.500	11.5	88.0	0.88	23	00	0	9	0	y	own bed	own bed	20	20	0	0	nothing	fruit & salted		nothing	0	1								Center	No
1540	20	499	2015-10-13	2001-10-23	2670	f	1974	Employed	High	1968	Employed	High	y	y	0	0	0		60.700	60.7	169.0	1.69	21	00	0	6	0	y	own bed	own bed	19	19	30	30	nothing	nothing	nothing	nothing	0	0								North	No
1541	10	505	2015-10-13	2007-01-27	3000	f	1974	Employed	High	1970	Employed	Middle	y	y	0	1	0		22.600	22.6	124.2	1.242	23	00	0	7	15	c	parents' bed	own bed	20	20	0	0	nothing	nothing	nothing	nothing	0	0								Center	No
1544	13	530	2015-10-13	2002-03-31	3750	f	1968	Works at home	Middle	1972	Employed	High	y	y	0	0	0		72.000	72	166.0	1.66	22	00	0	7	0	y	own bed	own bed	20	20	15	15	nothing	nothing	nothing	nothing	0	0								South	No
1545	13	530	2015-10-13	2013-04-23	3240	f	1979	Employed	University	1977	Employed	High	y	y	1	0	0		12.300	12.3	93.0	0.93	24	00	0	8	0	n	parents' bed	parents' bed	19	19	15	15	milk	other	nothing	nothing	2	2								South	No
1546	10	505	2015-10-14	2014-05-11	3720	m	1971	Employed	High	1971	Employed	High	y	y	1	0	0		11.830	11.83	84.0		21	45	45	7	0	n	other room	own bed	19	19	30	30	nothing	nothing	nothing	nothing	2	2.5								Center	Yes
1547	17	534	2015-10-13	2010-02-10	3400	f	1978	Works at home	University	1967	Employed	Middle	y	y	0	0	0		23.000	23	124.0	1.24	20	30	30	6	45	y	own bed	own bed	19	19	0	0	nothing	nothing	nothing	nothing	0	0								North	No
1548	17	534	2015-10-14	2012-12-09	3820	m	1973	Employed	University	1970	Employed	High	y	y	0	1	0		15.000	15	97.0	0.97	21	00	0	7	0	y	own bed	parents' bed	19	19	0	0	milk	nothing	nothing	nothing	0	0								North	Yes
1549	17	534	2015-10-14	2009-01-20	2400	f	1978	Employed	High	1980	Employed	High	y	y	1	0	0		23.300	23.3	122.0	1.22	20	45	45	7	0	y	own bed	own bed	19	19	0	0	juice	sweet	nothing	nothing	0	0								North	No
1551	9	518	2015-10-14	2003-12-12	3900	m	1975	Employed	High	1974	Employed	High	y	y	0	1	0		33.300	33.3	139.0	1.39	22	00	0	7	0	y	own bed	own bed	20	20	0	0	nothing	nothing	nothing	nothing	1	0								North	Yes
1552	10	505	2015-10-14	2007-10-17	2920	f	1975	Employed	High	1971	Employed	High	y	y	0	0	0		25.400	25.4	128.0	1.28	21	45	45	7	0	y	parents' bed	parents' bed	20	20	0	0	nothing	sweet	nothing	nothing	0	0								Center	No
1553	16	548	2015-10-15	2013-07-01	3777	m	1978	Employed	High	1976	Employed	University	y	y	1	0	0		13.500	13.5	89.0	0.89	21	45	45	9	45	n	own bed	own bed	20	20	0	0	nothing	nothing	nothing	nothing	0	2.5								Center	Yes
1554	16	548	2015-10-15	2011-10-05	3900	m	1977	Employed	High	1977	Employed	University	y	y	0	0	0		16.000	16	100.0	1	22	30	30	8	30	y	own bed	own bed	20	20	0	0	milk & juice	nothing	nothing	nothing	0	2.25								Center	Yes
1555	9	511	2015-10-15	2005-02-20	3550	m	1971	Employed	Middle	1969	Employed	High	y	y	0	0	0		50.000	50	152.0	1.52	22	30	30	8	0	y	own bed	own bed	20	20	0	0	nothing	sweet	nothing	nothing	0	0								North	Yes
1556	13	530	2015-10-15	2013-09-30	3650	m	1980	Employed	University	1977	Employed	High	y	y	0	0	2		12.100	12.1	86.0	0.86	22	30	30	7	0	n	parents' bed	own bed	19	19	30	30	milk & juice	nothing	nothing	nothing	2	2								South	Yes
1557	9	511	2015-10-15	2007-09-25	2670	f	1969	Employed	High	1967	Employed	High	y	y	1	0	0		23.000	23	120.5	1.205	22	00	0	7	15	c	own bed	own bed	19	19	45	45	nothing	nothing	nothing	nothing	0	0								North	No
1558	17	534	2015-10-15	2006-03-29	3600	f	1981	Works at home	High	1971	Employed	Middle	y	y	0	2	0		43.000	43	150.0	1.5	20	00	0	7	0	c	own bed	own bed	19	19	30	30	nothing	nothing	nothing	nothing	0	0								North	No
1559	9	511	2015-10-16	2005-12-24	3800	m	1971	Employed	Middle	1971	Employed	Middle	y	n	0	0	0		32.000	32	138.5	1.385	21	30	30	7	30	y	own bed	own bed	20	20	30	30	nothing	nothing	nothing	nothing	0	0								North	Yes
1561	20	574	2015-10-16	2008-06-14	3800	f	1979	Employed	University	1969	Employed	High	y	y	0	1	0		26.500	26.5	126.0	1.26	21	00	0	7	30	c	own bed	own bed	19	19	30	30	nothing	nothing	nothing	nothing	0	0								North	No
1562	17	534	2015-10-16	2004-12-01	3350	m	1979	Employed	University	1972	Unemployed	Middle	y	y	0	2	0		39.000	39	150.0	1.5	21	00	0	7	0	c	own bed	own bed	18	18	30	30	nothing	nothing	nothing	nothing	0	0								North	Yes
1563	17	534	2015-10-16	2008-05-08	3380	f	1979	Employed	University	1972	Unemployed	Middle	y	y	1	1	0		26.000	26	128.0	1.28	21	30	30	7	15	c	own bed	own bed	18	18	30	30	nothing	nothing	juice	nothing	1	0								North	No
1564	16	548	2015-10-16	2012-05-09	2860	f	1986	Employed	High	1982	Employed	High	y	y	0	0	0		15.000	15	89.0	0.89	22	15	15	7	0	y	own bed	own bed	20	20	0	0	milk	nothing	nothing	nothing	1	1.75								Center	No
1565	17	534	2015-10-13	2012-05-10	3300	m	1991	Works at home	High	1984	Employed	High	y	y	0	0	1		13.000	13	101.0	1.01	22	00	0	7	0	n	parents' bed	parents' bed	19	19	0	0	juice	nothing	juice	nothing	3	1.5								North	Yes
1566	17	534	2015-10-15	2010-09-16	3670	m	1986	Employed	University	1982	Employed	Middle	y	y	0	1	0		23.000	23	119.0	1.19	21	15	15	8	30	y	parents' bed	parents' bed	19	19	30	30	nothing	nothing	nothing	nothing	1	0								North	Yes
1567	7	585	2015-10-15	2009-02-16	3250	m	1975	Employed	High	1973	Employed	High	y	y	0	1	0		23.500	23.5	120	1.2	21	30	30	9	0	c	own bed	own bed	19	19	30	30	milk	nothing	nothing	nothing	0	0								Center	Yes
1568	16	545	2015-10-21	2013-12-19	3860	f	1983	Employed	University	1980	Employed	University	y	y	0	0	0		13.000	13	88.0		23	15	15	10	15	y	own bed	own bed	19	19	0	0	milk	fruit & salted	other	other	2	3								Center	No
1569	17	534	2015-10-20	2008-08-31	4200	f	1986	Employed	Middle	1979	Employed	Middle	y	y	1	0	0		32.000	32	131.0	1.31	21	00	0	7	15	c	parents' bed	own bed	18	18	30	30	juice	nothing	nothing	nothing	0	0								North	No
1570	17	534	2015-10-20	2006-05-18	3250	f	1974	Employed	High	1963	Employed	Middle	y	y	1	0	0		27.500	27.5	135.0	1.35	21	30	30	7	0	c	own bed	own bed	19	19	30	30	nothing	nothing	nothing	nothing	0	0								North	No
1571	16	607	2015-10-20	2007-11-16	2530	m	1967	Works at home	High	1968	Employed	Middle	y	y	0	0	0		32.500	32.5	133.8	1.338	22	15	15	7	15	y	own bed	own bed	20	20	0	0	nothing	nothing	nothing	nothing	0	0								Center	Yes
1572	16	545	2015-10-20	2013-10-10	2800	f	1977	Employed	University	1975	Employed	University	y	y	0	0	0		14.000	14	95.0	0.95	21	00	0	7	0	y	own bed	own bed	19	19	0	0	other	nothing	nothing	nothing	0	1								Center	No
1574	10	505	2015-10-20	2008-10-26	3120	f	1973	Employed	High	1970	Employed	High	y	y	0	0	0		37.000	37	127.4	1.274	20	45	45	7	0	y	parents' bed	own bed	19	19	30	30	nothing	nothing	nothing	nothing	0	0								Center	No
1575	9	554	2015-10-20	2009-09-03	3250	m	1976	Employed	High	1977	Employed	High	y	y	0	0	0		19.700	19.7	113.0	1.13	21	15	15	7	30	y	own bed	own bed	19	19	0	0	nothing	nothing	nothing	nothing	0	0								North	Yes
1576	13	530	2015-10-20	2004-09-17	2640	m		Employed	High	1971	Employed	University	y	y	0	0	0		60.000	60	157.0	1.57	22	30	30	7	15	y	parents' bed	own bed	21	21	0	0	nothing	nothing	nothing	nothing	0	0.5								South	Yes
1578	16	607	2015-10-21	2013-10-03	3270	f	1978	Employed	High	1977	Employed	Middle	y	y	0	1	1		11.900	11.9	89.0	0.89	22	30	30	8	30	n	parents' bed	parents' bed	19	19	30	30	milk	nothing	milk	nothing	2	1								Center	No
1581	20	574	2015-10-21	2009-11-20	3560	f	1985	Employed	High	1968	Employed	Middle	y	y	0	1	0		23.500	23.5	116.5	1.165	21	45	45	7	15	y	parents' bed	parents' bed	19	19	30	30	nothing	nothing	nothing	nothing	0	0								North	No
1583	4	523	2015-10-21	2010-03-10	2600	f	1988	Works at home	High	1984	Employed	High	y	y	1	1	2		13.000	13	105.0	1.05	21	00	0	7	30	c	parents' bed	parents' bed	19	19	0	0	nothing	sweet	nothing	nothing	1	0								South	No
1585	10	505	2015-10-21	2011-02-16	3280	m	1972	Employed	University	1976	Employed	High	y	y	0	0	0		21.400	21.4	111.2	1.112	21	30	30	7	45	y	own bed	own bed	20	20	0	0	nothing	sweet	nothing	nothing	0	0.5								Center	Yes
1587	4	491	2015-10-21	2007-08-09	3860	m	1972	Works at home	Middle	1969	Employed	Middle	y	y	1	1	0		27.000	27	127.0	1.27	22	30	30	7	15	y	other room	own bed	19	19	0	0	nothing	nothing	nothing	nothing	0	0								South	Yes
1588	4	491	2015-10-21	2005-10-20	3500	f	1978	Employed	High	1974	Employed	Middle	y	y	1	0	0		35.000	35	135.0	1.35	23	00	0	7	30	y	own bed	own bed	20	20	0	0	nothing	nothing	nothing	nothing	0	0								South	No
1589	4	608	2015-10-21	2012-04-22	2900	f	1986	Employed	High	1981	Employed	High	y	y	0	1	0		14.600	14.6	95.0	0.95	23	30	30	8	0	y	own bed	own bed	19	19	0	0	nothing	sweet	nothing	nothing	1	0								South	No
1590	4	608	2015-10-21	2011-10-25	3500	m	1982	Employed	High	1982	Employed	High	y	y	0	1	0		16.800	16.8	108.5	1.085	21	00	0	7	30	y	other room	own bed	19	19	15	15	nothing	nothing	nothing	nothing	1	0								South	Yes
1591	4	608	2015-10-21	2010-02-05	2420	f	1978	Works at home	Middle	1975	Employed	Middle	y	y	0	1	0		24.600	24.6	110.5	1.105	23	30	30	8	0	n	parents' bed	parents' bed	20	20	0	0	milk	nothing	nothing	nothing	0	0								South	No
1593	17	534	2015-10-21	2006-04-26	3140	f	1980	Employed	High	1976	Employed	High	y	y	1	0	0		58.000	58	146.0	1.46	21	15	15	6	45	y	own bed	own bed	19	19	0	0	nothing	nothing	nothing	nothing	2	0								North	No
1594	17	534	2015-10-21	2004-02-29	3080	f	1979	Employed	High	1963	Employed	High	y	y	0	2	0		43.000	43	153.0	1.53	21	45	45	6	45	c	own bed	own bed	19	19	30	30	nothing	nothing	nothing	nothing	0	0								North	No
1595	17	534	2015-10-22	2014-10-10	2760	m	1979	Employed	High	1978	Employed	Middle	y	y	0	0	0		8.800	8.8	76.0		22	00	0	8	0	y	parents' bed	parents' bed	19	19	45	45	nothing	nothing	nothing	nothing	2	2								North	Yes
1596	17	534	2015-10-22	2009-10-16	3400	m	1974	Employed	High	1972	Employed	High	y	y	0	1	0		23.000	23	122.0	1.22	21	00	0	6	45	y	own bed	own bed	20	20	0	0	nothing	nothing	nothing	nothing	0	0								North	Yes
1598	7	585	2015-10-22	2004-07-15	3210	m	1973	Employed	Middle	1969	Employed	Middle	y	y	0	0	0		44.050	44.05	138.5	1.385	23	30	30	9	0	y	other room	own bed	19	19	30	30	nothing	nothing	nothing	nothing	0	0								Center	Yes
1599	7	585	2015-10-22	2014-04-21	3420	m	1981	Works at home	High	1978	Employed	High	y	y	0	0	0		10.900	10.9	83.0		22	00	0	6	45	y	other room	own bed	19	19	30	30	milk	nothing	nothing	nothing	2	1								Center	Yes
1600	13	530	2015-10-22	2013-09-22	3490	m	1976	Unemployed	High	1970	Employed	High	y	y	2	1	0		15.000	15	100.0	1	21	00	0	7	30	n	own bed	own bed	18	18	45	45	nothing	nothing	nothing	nothing	0	0								South	Yes
1601	9	511	2015-10-22	2003-06-17	2250	m	1966	Employed	High	1961	Employed	Middle	y	y	0	0	0		47.500	47.5	149.0	1.49	22	15	15	7	15	y	own bed	own bed	19	19	30	30	nothing	nothing	nothing	nothing	0	0								North	Yes
1602	13	530	2015-10-22	2005-06-25	3250	m	1973	Works at home	High	1969	Employed	High	y	y	0	1	0		36.000	36	139.0	1.39	21	15	15	7	30	y	other room	own bed	20	20	15	15	nothing	nothing	nothing	nothing	0	0								South	Yes
1603	13	530	2015-10-22	2010-10-08	3200	f	1973	Works at home	High	1969	Employed	High	y	y	1	0	0		26.000	26	118.0	1.18	21	15	15	7	30	c	other room	own bed	20	20	0	0	nothing	nothing	nothing	nothing	0	0								South	No
1604	13	530	2015-10-22	2005-09-04	3500	f	1968	Employed	High	1964	Employed	High	y	y	0	0	0		31.500	31.5	139.0	1.39	21	30	30	7	15	y	other room	own bed	20	20	45	45	nothing	nothing	nothing	nothing	1	0								South	No
1605	16	607	2015-10-22	2014-04-09	2550	m	1978	Employed	University	1975	Employed	High	y	y	1	0	0		11.520	11.52	81.7		21	30	30	6	30	n	parents' bed	parents' bed	18	18	45	45	nothing	nothing	nothing	nothing	4	1.25								Center	Yes
1606	4	608	2015-10-22	2011-10-13	2700	m	1978	Works at home	Middle	1977	Unemployed	Middle	y	y	1	0	0		14.000	14	98.2	0.982	24	00	0	7	0	y	own bed	own bed	20	20	0	0	milk	nothing	nothing	nothing	3	0.5								South	Yes
1607	4	608	2015-10-22	2011-09-15	2930	f	1977	Works at home	Middle	1983	Employed	Middle	y	y	0	1	0		29.300	29.3	112.0	1.12	20	30	30	7	15	y	parents' bed	parents' bed	19	19	0	0	nothing	nothing	nothing	nothing	0	1								South	No
1608	4	523	2015-10-23	2005-10-06	3000	m	1978	Unemployed	Middle	1975	Employed	Middle	y	y	0	3	2		40.000	40	138.0	1.38	22	00	0	8	0	y	own bed	own bed	20	20	30	30	nothing	sweet	nothing	nothing	0	0								South	Yes
1609	4	523	2015-10-23	2005-01-25	2850	f	1973	Employed	High	1970	Employed	High	y	y	1	0	0		42.500	42.5	157.0	1.57	21	45	45	7	15	y	own bed	own bed	19	19	30	30	nothing	nothing	nothing	nothing	0	0								South	No
1610	10	505	2015-10-23	2009-02-14	3200	m	1987	Employed	High	1982	Employed	High	y	y	0	0	0		18.700	18.7	112.0	1.12	22	15	15	6	45	y	parents' bed	parents' bed	20	20	0	0	juice	nothing	nothing	nothing	0	0								Center	Yes
1611	7	585	2015-10-23	2009-08-02	3200	f	1982	Employed	High	1978	Employed	High	y	y	0	0	0		27.400	27.4	119.0	1.19	21	30	30	9	0	c	own bed	own bed	19	19	45	45	nothing	fruit	nothing	nothing	1	0								Center	No
1612	17	534	2015-10-23	2002-02-02	3350	f	1974	Employed	Middle	1970	Employed	Middle	y	y	0	1	0		53.000	53	165.0	1.65	22	30	30	7	0	c	own bed	own bed	19	19	45	45	nothing	nothing	nothing	nothing	0	0								North	No
1613	17	534	2015-10-23	2012-12-23	3350	m	1987	Employed	High	1985	Employed	Middle	y	y	0	1	0		15.000	15	97.0	0.97	21	00	0	7	30	y	own bed	own bed	19	19	0	0	milk	fruit	nothing	nothing	0	1.25								North	Yes
1614	4	608	2015-10-23	2009-02-18	3450	f	1975	Employed	High	1971	Employed	Middle	y	y	1	0	0		22.700	22.7	123.4	1.234	23	00	0	7	30	y	own bed	own bed	20	20	15	15	nothing	nothing	nothing	nothing	0	0								South	No
1615	13	606	2015-10-23	2003-06-06	2850	f	1970	Employed	High	1966	Employed	Middle	y	y	0	0	0		48.000	48	156.0	1.56	23	00	0	6	45	y	own bed	own bed	21	21	15	15	nothing	nothing	nothing	nothing	0	0								South	No
1616	13	606	2015-10-22	2014-05-30	3720	m	1987	Works at home	Middle	1980	Employed	Middle	y	y	1	0	0		10.600	10.6	80.0		22	30	30	9	0	n	parents' bed	parents' bed	19	19	30	30	milk	sweet	milk	nothing	4	2								South	Yes
1617	13	606	2015-10-22	2012-02-03	3270	m	1979	Unemployed	High	1974	Employed	High	y	y	0	1	0		16.000	16	99.0	0.99	22	00	0	9	0	y	own bed	own bed	19	19	30	30	milk	nothing	nothing	nothing	2	2								South	Yes
1618	13	606	2015-10-22	2013-09-14	3480	m	1979	Unemployed	High	1974	Employed	High	y	y	1	0	0		14.000	14	92.0	0.92	21	30	30	7	30	n	own bed	own bed	19	19	30	30	milk	nothing	nothing	nothing	1	2.75								South	Yes
1619	13	606	2015-10-21	2008-09-03	3050	m	1973	Works at home	High	1975	Employed	High	y	y	1	0	0		23.000	23	120.0	1.2	21	45	45	7	15	c	own bed	own bed	19	19	45	45	nothing	nothing	nothing	nothing	0	0								South	Yes
1620	13	606	2015-10-21	2005-01-18	3630	m	1973	Employed	High	1975	Employed	High	y	y	0	1	0		30.500	30.5	142.0	1.42	22	15	15	7	0	c	own bed	own bed	19	19	45	45	nothing	nothing	nothing	nothing	0	0								South	Yes
1621	13	606	2015-10-21	2006-07-08	2400	f	1974	Employed	University	1970	Employed	University	y	y	0	0	0		36.000	36	141.0	1.41	22	00	0	7	15	y	own bed	own bed	20	20	30	30	nothing	nothing	nothing	nothing	0	0								South	No
1622	13	606	2015-10-21	2001-11-07	3750	m	1965	Employed	High	1963	Employed	Middle	y	y	2	0	0		47.500	47.5	167.0	1.67	23	30	30	6	0	y	own bed	own bed	20	20	30	30	nothing	nothing	nothing	nothing	0	0								South	Yes
1623	13	606	2015-10-20	2011-05-26	3150	m	1987	Works at home	High	1984	Employed	Middle	y	y	0	1	0		15.000	15	105.0	1.05	22	30	30	9	0	y	parents' bed	own bed	20	20	30	30	milk	nothing	nothing	nothing	0	0								South	Yes
1624	13	606	2015-10-20	2013-09-18	3060	m	1980	Employed	High	1976	Employed	University	y	y	0	0	0		11.600	11.6	86.5	0.865	22	30	30	8	45	y	own bed	own bed	19	19	30	30	nothing	nothing	nothing	nothing	1	0								South	Yes
1626	13	606	2015-10-20	2013-10-01	3350	f	1980	Unemployed	High	1978	Other	High	y	y	0	1	0		14.100	14.1	91.5	0.915	23	00	0	9	0	y	parents' bed	parents' bed	20	20	0	0	milk	nothing	nothing	nothing	1	2								South	No
1627	13	606	2015-10-20	2014-07-16	3550	m	1991	Works at home	University	1991	Employed	High	y	y	0	1	0		9.500	9.5	76.0		21	00	0	7	30	n	own bed	own bed	20	20	0	0	nothing	nothing	nothing	nothing	0	4								South	Yes
1628	13	606	2015-10-20	2011-10-18	3250	m	1985	Employed	High	1980	Employed	Middle	y	y	1	0	0		19.000	19	108.0	1.08	23	30	30	10	0	c	parents' bed	parents' bed	20	20	30	30	nothing	nothing	nothing	nothing	1	4								South	Yes
1629	13	606	2015-10-20	2003-02-21	3900	m	1975	Works at home	Middle	1968	Employed	Middle	y	y	0	1	0		42.500	42.5	154.0	1.54	1	00	0	7	0	y	own bed	own bed	20	20	30	30	other	nothing	nothing	nothing	0	1								South	Yes
1630	13	606	2015-10-20	2007-07-21	3100	f	1971	Works at home	Middle	1972	Employed	Middle	y	y	0	0	0		27.000	27	127.0	1.27	21	15	15	5	0	y	parents' bed	own bed	19	19	30	30	juice	nothing	nothing	nothing	4	0								South	No
1631	13	606	2015-10-20	2010-05-22	3350	m	1980	Works at home	Middle	1979	Employed	Middle	y	y	1	0	0		20.000	20	112.5	1.125	21	00	0	7	0	c	own bed	own bed	20	20	0	0	nothing	nothing	nothing	nothing	1	0								South	Yes
1632	4	491	2015-10-27	2012-01-10	3580	m	1975	Employed	High	1974	Employed	High	y	y	0	1	0		18.500	18.5	108.6	1.086	0	15	15	6	45	y	own bed	own bed	20	20	30	30	milk	sweet	nothing	nothing	0	2.5								South	Yes
1633	10	505	2015-10-27	2008-05-06	2750	f	1981	Employed	High	1971	Employed	High	y	y	0	1	0		28.000	28	126.0	1.26	21	30	30	7	0	y	own bed	own bed	19	19	30	30	milk	nothing	nothing	nothing	0	0								Center	No
1635	10	609	2015-10-27	2012-10-26	2780	m	1978	Employed	High	1976	Employed	University	y	y	0	1	0		11.500	11.5	95.0	0.95	21	30	30	7	15	y	own bed	own bed	20	20	15	15	nothing	nothing	nothing	nothing	0	1								Center	Yes
1636	7	585	2015-10-27	2014-08-07	3500	f	1984	Works at home	High	1978	Employed	University	y	y	0	0	0		11.130	11.13	82.0		22	00	0	7	30	n	own bed	parents' bed	19	19	45	45	milk	nothing	nothing	nothing	2	2								Center	No
1637	9	554	2015-10-27	2006-03-13	2770	f	1973	Employed	Middle	1968	Employed	Middle	y	y	2	0	0		33.400	33.4	137.0	1.37	21	15	15	7	15	c	other room	own bed	19	19	15	15	nothing	nothing	nothing	nothing	0	0								North	No
1638	13	530	2015-10-27	2009-10-09	2730	m	1970	Works at home	High	1964	Employed	High	y	y	2	0	0		24.100	24.1	121.0	1.21	22	30	30	7	0	n	own bed	own bed	20	20	30	30	nothing	nothing	nothing	nothing	0	0								South	Yes
1639	4	491	2015-10-27	2010-03-16	3560	m	1980	Employed	University	1973	Employed	High	y	y	0	1	0		21.500	21.5	112.7	1.127	21	30	30	7	0	y	other room	other room	19	19	30	30	juice	sweet	nothing		0	0								South	Yes
1640	7	585	2015-10-27	2004-07-09	3600	f	1982	Employed	High	1969	Unemployed	High	y	y	1	1	0		62.000	62	157.0	1.57	22	30	30	7	15	c	own bed	own bed	20	20	30	30	nothing	nothing	nothing	nothing	0	0								Center	No
1641	17	534	2015-10-27	2002-12-30	3380	m	1982	Works at home	High	1974	Employed	Middle	y	y	0	2	0		73.000	73	167.0	1.67	22	30	30	7	0	c	own bed	own bed	20	20	0	0	nothing	nothing	nothing	nothing	0	0								North	Yes
1642	17	534	2015-10-27	2005-05-10	3700	f	1972	Employed	High				y	n	0	0	0	n	38.000	38	144.0	1.44	20	45	45	7	0	y	parents' bed	parents' bed	19	19	0	0	juice	nothing	nothing	nothing	0	0								North	No
1643	4	608	2015-10-27	2011-08-11	3300	f	1983	Works at home	Middle	1982	Employed	High	y	y	1	0	0		16.000	16	95.5	0.955	22	00	0	7	15	y	parents' bed	parents' bed	20	20	0	0	nothing	nothing	nothing	nothing	0	0								South	No
1644	4	608	2015-10-27	2010-10-02	2750	f	1979	Works at home	Middle	1974	Unemployed	Middle	y	y	0	1	0		18.300	18.3	106.8	1.068	23	30	30	7	30	y	own bed	own bed	20	20	0	0	milk	other	nothing	nothing	2	0								South	No
1645	9	553	2015-10-28	2013-10-24	3340	f	1980	Employed	University	1981	Employed	University	y	y	1	0	0		13.900	13.9	85.5	0.855	21	30	30	7	15	y	parents' bed	own bed	19	19	30	30	nothing	nothing	nothing	nothing	1	4								North	No
1646	10	603	2015-10-28	2012-08-22	3800	m	1980	Works at home	University	1974	Other	University	y	y	0	1	0		15.500	15.5	96.0	0.96	22	45	45	7	15	y	parents' bed	own bed	21	21	0	0		nothing	nothing	nothing	1	2								Center	Yes
1647	10	603	2015-10-28	2003-09-03	4130	m	1973	Employed	High	1970	Employed	University	y	y	0	1	0		61.000	61	154.0	1.54	22	15	15	7	0	y	own bed	own bed	21	21	0	0	nothing	nothing	nothing	nothing	0	0								Center	Yes
1648	17	534	2015-10-28	2008-05-20	2800	m	1976	Works at home	High	1965	Employed	University	y	y	4	0	0		23.000	23	125.0	1.25	21	00	0	7	0	c	own bed	own bed	19	19	15	15	nothing	nothing	nothing	nothing	0	0								North	Yes
1649	9	558	2015-10-28	2006-04-20	3180	f	1986	Works at home	High	1983	Employed	Middle	y	y	0	2	4		30.000	30	132.0	1.32	22	00	0	7	0	c	own bed	own bed	20	20	0	0	milk & juice	nothing	nothing	nothing	0	0								North	No
1650	4	523	2015-10-28	2010-07-15	2550	m	1974	Works at home	High	1972	Employed	High	y	y	1	0	0		21.500	21.5	119.0	1.19	23	45	45	7	30	n	parents' bed	parents' bed	19	19	30	30	milk	nothing	nothing	nothing	1	1								South	Yes
1651	4	523	2015-10-28	2007-01-25	2910	f	1974	Works at home	High	1972	Employed	High	y	y	0	1	0		39.000	39	132.0	1.32	23	00	0	7	15	n	own bed	own bed	19	19	30	30	nothing	nothing	nothing	nothing	0	0								South	No
1652	4	523	2015-10-28	2011-03-09	3180	f	1986	Works at home	Middle	1989	Employed	Middle	y	y	0	0	0		18.500	18.5	107.0	1.07	23	15	15	8	15	y	outside home	own bed	20	20	30	30	nothing	nothing	nothing	nothing	1	0.5								South	No
1653	4	608	2015-10-28	2010-06-24	3330	m	1982	Employed	University	1977	Employed	Middle	y	y	0	1	0		18.500	18.5	110.0	1.1	21	45	45	7	0	y	other room	own bed	19	19	45	45	nothing	nothing	nothing	nothing	0	0								South	Yes
1654	4	608	2015-10-28	2006-12-17	2700	m	1978	Works at home	Middle	1976	Unemployed	Middle	y	y	0	1	0		23.200	23.2	123.0	1.23	22	30	30	7	0	y	own bed	own bed	20	20	30	30	nothing	nothing	nothing	nothing	0	0								South	Yes
1655	4	608	2015-10-28	2014-05-26	3150	m	1982	Employed	High	1978	Employed	Middle	y	y	1	0	2		10.820	10.82	80.0		0	15	15	9	15	n	own bed	parents' bed	19	19	30	30	nothing	sweet	nothing	nothing	3	1.25								South	Yes
1656	4	608	2015-10-28	2003-08-22	3250	m	1978	Works at home	High	1970	Employed	High	y	y	1	1	0		34.500	34.5	149.8	1.498	22	30	30	8	30	y	own bed	own bed	20	20	30	30	nothing	nothing	nothing	nothing	0	0								South	Yes
1657	9	521	2015-10-29	2010-08-02	1970	f	1976	Employed	University	1970	Employed	Middle	y	y	1	0	0		17.000	17	110.0	1.1	20	15	15	7	30	c	own bed	own bed	19	19	0	0	nothing	nothing	nothing	nothing	0	0								North	No
1658	7	585	2015-10-28	2009-02-26	3580	m	1975	Employed	University	1975	Employed	High	y	y	0	2	0		23.100	23.1	117.0	1.17	21	30	30	7	0	y	parents' bed	own bed	19	19	30	30	nothing	nothing	nothing	nothing	1	0								Center	Yes
1659	7	585	2015-10-28	2011-03-18	3630	m	1982	Employed	University	1977	Employed	High	y	y	0	1	0		16.900	16.9	109.0	1.09	21	00	0	7	30	n	parents' bed	parents' bed	19	19	0	0	nothing	nothing	nothing	nothing	1	2								Center	Yes
1660	9	521	2015-10-29	2009-01-27	3000	m	1977	Employed	High	1968	Employed	Middle	y	y	2	0	0		18.000	18	118.0	1.18	22	00	0	7	0	c	own bed	own bed	20	20	0	0	nothing	nothing	nothing	nothing	1	0								North	Yes
1661	10	603	2015-10-29	2006-01-06	3350	m	1968	Works at home	University	1961	Unemployed	University	y	y	1	0	0		39.000	39	140.0	1.4	21	30	30	7	15	c	own bed	own bed	19	19	30	30	nothing	sweet	nothing	nothing	0	0								Center	Yes
1662	7	585	2015-10-29	2009-06-12	2800	m	1973	Employed	University	1968	Employed	University	y	y	0	1	0		26.000	26	126.5	1.265	22	00	0	7	15	c	own bed	own bed	19	19	30	30	nothing	fruit	milk	nothing	0	0								Center	Yes
1663	7	585	2015-10-29	2008-02-02	3630	f	1981	Works at home	Middle	1972	Employed	Middle	y	y	1	0	1		24.500	24.5	120.5	1.205	21	00	0	6	45	c	own bed	own bed	19	19	30	30	nothing	nothing	nothing	nothing	1	0								Center	No
1665	15	610	2015-10-29	2010-05-04	3000	m	1977	Employed	University	1977	Employed	High	y	y	0	1	0		25.000	25	120.0	1.2	22	00	0	6	0	y	own bed	own bed	20	20	0	0	nothing	nothing	nothing	nothing	0	0								South	Yes
1666	10	603	2015-10-29	2011-04-18	2340	f	1981	Employed	University	1975	Employed	High	y	y	0	0	0		17.000	17	103.0	1.03	22	45	45	8	15	y	own bed	own bed	20	20	15	15	milk	nothing	nothing	nothing	0	0								Center	No
1667	17	534	2015-10-29	2006-11-11	2830	m	1981	Employed	High	1974	Employed	High	y	y	0	0	0		29.000	29	140.0	1.4	21	30	30	7	15	y	own bed	own bed	18	18	30	30	nothing	sweet	nothing	nothing	0	0								North	Yes
1668	17	534	2015-10-29	2010-11-26	2950	m	1982	Employed	High	1982	Employed	High	y	y	0	1	0		17.000	17	107.0	1.07	21	00	0	7	30	y	other room	own bed	19	19	0	0	juice	nothing	nothing	nothing	0	0								North	Yes
1669	10	505	2015-10-30	2004-11-03	3150	f	1973	Employed	High	1973	Employed	High	y	y	0	1	0		42.200	42.2	143.2	1.432	22	30	30	7	0	c	parents' bed	own bed	20	20	30	30	nothing	nothing	nothing	nothing	0	0								Center	No
1671	10	609	2015-10-30	2005-03-29	3100	m	1973	Works at home	University	1970	Employed	High	y	y	0	1	0		32.000	32	139.0	1.39	22	15	15	7	15	c	own bed	own bed	20	20	0	0	nothing	nothing	nothing	nothing	0	0								Center	Yes
1672	10	609	2015-10-30	2014-08-28	3675	m	1983	Employed	High	1959	Employed	High	y	y	1	0	0		11.200	11.2	79.0		21	45	45	7	30	n	parents' bed	parents' bed	18	18	30	30	nothing	nothing	nothing	nothing	1	1								Center	Yes
1673	20	574	2015-10-30	2006-06-05	3060	f	1973	Employed	High	1968	Employed	Middle	y	y	0	1	0		21.500	21.5	125.0	1.25	21	30	30	7	0	c	own bed	own bed	19	19	30	30	nothing	nothing	nothing	nothing	0	0								North	No
1674	7	585	2015-10-30	2010-09-10	3150	m	1979	Employed	University	1972	Employed	University	y	y	0	1	0		20.250	20.25	112.0	1.12	21	30	30	8	0	c	other room	own bed	19	19	0	0	nothing	fruit	nothing	nothing	0	0								Center	Yes
1675	7	585	2015-10-30	2002-06-20	3300	m	1973	Employed	High	1976	Employed	Middle	y	y	0	1	0		46.500	46.5	160.0	1.6	22	00	0	7	0	c	other room	own bed	20	20	15	15	juice	nothing	nothing	nothing	0	0								Center	Yes
1676	10	609	2015-10-30	2013-05-14	3050	f	1987	Employed	High	1982	Employed	Middle	y	y	0	1	0		13.000	13	87.0	0.87	22	00	0	8	0	y	own bed	own bed	20	20	15	15	nothing	nothing	nothing	nothing	1	1.75								Center	No
1677	17	534	2015-10-30	2009-04-06	3260	m	1984	Works at home	High	1974	Employed	High	y	y	1	0	0		21.000	21	122.0	1.22	21	00	0	7	0	c	other room	own bed	19	19	0	0	nothing	nothing	nothing	nothing	0	0								North	Yes
1678	17	534	2015-10-30	2012-10-21	3150	f	1980	Employed	University	1979	Employed	High	y	y	1	0	0		15.000	15	100.0	1	20	00	0	7	30	c	own bed	own bed	19	19	15	15	nothing	nothing	nothing	nothing	0	2								North	No
1679	15	610	2015-10-30	2014-04-30	3360	f	1979	Employed	University	1977	Employed	University	y	y	0	0	0		9.910	9.91	80.0		21	30	30	6	30	n	own bed	own bed	19	19	30	30	milk	nothing	nothing	nothing	1	2								South	No
1681	4	608	2015-10-30	2009-09-23	2400	m	1982	Employed	High	1975	Unemployed	High	y	y	1	0	1		26.700	26.7	122.2	1.222	21	00	0	7	30	n	own bed	own bed	20	20	0	0	milk	fruit	nothing	nothing	0	0								South	Yes
1682	4	608	2015-10-30	2007-07-12	3450	f	1981	Works at home	High	1977	Employed	High	y	y	0	1	0		34.500	34.5	134.0	1.34	22	00	0	6	30	n	own bed	own bed	19	19	30	30	nothing	nothing	nothing	nothing	0	0								South	No
1684	10	609	2015-10-30	2011-07-04	3290	f	1990	Employed	Middle	1987	Employed	University	y	y	0	0	3		18.600	18.6	95.0	0.95	22	00	0	7	0	n	parents' bed	parents' bed	19	19	30	30	nothing	nothing	nothing	nothing	1	1.5								Center	No
1685	20	487	2015-10-30	2010-08-01	3040	f	1984	Employed	Middle	1983	Employed	Middle	y	y	0	0	0		17.900	17.9	110.0	1.1	20	45	45	7	0	y	parents' bed	own bed	19	19	45	45	nothing	nothing	nothing	nothing	1	0.75								North	No
1687	9	553	2015-11-03	2013-11-02	2250	f	1976	Employed	High	1967	Employed	High	y	y	1	0	0		10.700	10.7	80.2	0.802	22	30	30	8	30	n	parents' bed	parents' bed	19	19	0	0	nothing	nothing	nothing	nothing	1	1								North	No
1688	10	603	2015-11-03	2012-11-13	3780	m	1984	Works at home	Middle	1978	Employed	High	y	y	0	0	0		15.000	15	95.0	0.95	23	00	0	8	15	n	parents' bed	parents' bed	19	19	15	15	nothing	fruit	nothing	nothing	0	2								Center	Yes
1689	10	609	2015-11-03	2004-02-22	3550	m	1970	Works at home	High	1962	Employed	High	y	y	2	0	2		48.000	48	154.0	1.54	23	30	30	7	45	y	own bed	own bed	20	20	0	0	nothing	nothing	nothing		0	0								Center	Yes
1690	15	610	2015-11-03	2010-04-10	3300	m	1974	Works at home	Middle	1978	Employed	Middle	y	y	0	0	0		18.000	18	116.0	1.16	22	30	30	8	45	y	parents' bed	parents' bed	20	20	30	30	nothing	nothing	nothing	nothing	0	2								South	Yes
1691	16	545	2015-11-03	2013-01-11	3000	f	1983	Employed	University	1976	Employed	University	y	y	0	0	0		14.000	14	90.0	0.9	21	00	0	7	0	y	own bed	own bed	20	20	0	0	nothing	nothing	nothing	nothing	1	0.75								Center	No
1692	17	534	2015-11-03	2006-07-06	3480	m	1986	Employed	High	1978	Employed	High	y	y	0	1	2		28.000	28	131.0	1.31	21	15	15	7	0	y	own bed	own bed	19	19	30	30	nothing	salted	nothing	nothing	0	0								North	Yes
1693	17	534	2015-11-03	2011-06-12	2800	m	1988	Employed	High	1985	Employed	Middle	y	n	0	0	2		16.000	16	110.0	1.1	20	15	15	7	30	y	parents' bed	parents' bed	18	18	30	30	nothing	nothing	nothing	nothing	0	0								North	Yes
1695	10	603	2015-11-03	2008-06-02	3030	f	1974	Employed	University	1974	Employed	High	y	y	1	0	0		25.000	25	125.0	1.25	22	30	30	7	15	c	own bed	own bed	20	20	0	0	nothing	nothing	nothing	nothing	0	2								Center	No
1696	10	603	2015-11-03	2010-08-03	2600	f	1973	Works at home	High	1975	Employed	Middle	y	y	1	0	0		19.000	19	110.5	1.105	22	15	15	7	15	c	parents' bed	own bed	19	19	30	30	milk	nothing	nothing	nothing	0	0								Center	No
1697	4	523	2015-11-03	2010-07-20	3000	f	1978	Works at home	Middle	1976	Employed	Middle	y	y	1	0	0		19.000	19	114.0	1.14	23	30	30	9	0	y	parents' bed	own bed	19	19	0	0	other	nothing	nothing	nothing	0	0								South	No
1698	10	603	2015-11-03	2008-11-27	3900	m	1976	Works at home	University	1967	Employed	High	y	y	0	1	0		25.000	25	126.0	1.26	21	45	45	7	30	y	own bed	own bed	20	20	0	0	nothing	nothing	nothing	nothing	0	0								Center	Yes
1699	10	505	2015-11-03	2013-07-04	2250	f	1980	Employed	University	1977	Employed	High	y	y	1	0	0		11.800	11.8	90.0	0.9	22	30	30	7	15	c	own bed	own bed	20	20	0	0	juice	nothing	nothing	nothing	1	1.5								Center	No
1700	10	505	2015-11-03	2009-10-23	3200	f	1980	Employed	University	1977	Employed	High	y	y	0	1	0		18.900	18.9	115.0	1.15	22	00	0	7	15	c	own bed	own bed	20	20	0	0	nothing	nothing	nothing	nothing	0	0								Center	No
1702	13	530	2015-11-03	2006-08-06	3450	f	1975	Employed	High	1969	Employed	High	y	y	1	0	0		38.000	38	144.0	1.44	21	30	30	7	0	c	own bed	own bed	19	19	30	30	nothing	nothing	nothing	nothing	0	0								South	No
1703	13	530	2015-11-03	2011-07-31	2540	f	1976	Unemployed	University	1983	Employed	High	y	y	0	1	0		15.500	15.5	101.0	1.01	22	00	0	8	0	y	own bed	own bed	20	20	0	0	nothing	nothing	nothing	nothing	0	0								South	No
1704	10	611	2015-11-03	2011-07-07	3750	m	1974	Works at home	High	1979	Employed	High	y	y	0	1	0		20.000	20	114.0	1.14	22	30	30	7	0	y	own bed	own bed	20	20	0	0	nothing	nothing	nothing	nothing	0	1								Center	Yes
1705	10	611	2015-11-03	2012-01-21	2950	m	1974	Employed	University	1978	Employed	University	y	y	0	0	0		27.000	27	115.0	1.15	22	30	30	8	0	n	parents' bed	parents' bed	20	20	0	0	nothing	nothing	nothing	nothing	1	2								Center	Yes
1706	10	603	2015-11-04	2007-09-14	4130	m	1973	Employed	University	1972	Employed	High	y	y	1	0	0		25.000	25	125.5	1.255	21	45	45	7	15	c	own bed	own bed	19	19	45	45	nothing	nothing	nothing	nothing	1	0								Center	Yes
1707	10	505	2015-11-04	2012-11-02	3700	m	1981	Works at home	High	1977	Employed	High	y	y	1	0	0		17.300	17.3	103.4	1.034	21	30	30	7	30	c	own bed	own bed	20	20	0	0	nothing	nothing	nothing	nothing	1	3								Center	Yes
1708	20	487	2015-11-03	2011-05-10	3270	m	1973	Employed	University	1965	Employed	University	y	n	0	0	0		16.900	16.9	106.0	1.06	22	30	30	6	0	y	parents' bed	parents' bed	20	20	0	0	nothing	sweet	nothing	nothing	1	0								North	Yes
1709	7	585	2015-11-04	2014-05-03	416	f	1980	Works at home	University	1978	Employed	High	y	y	0	0	0		10.250	10.25	82.0		22	45	45	8	15	n		own bed	20	20	0	0	milk & juice	nothing	milk	nothing	2	2								Center	No
1710	20	487	2015-11-04	2009-08-17	2930	f	1970	Employed	High	1969	Employed	High	y	y	0	0	0		24.000	24	113.0	1.13	21	15	15	7	45	y	own bed	own bed	20	20	0	0	milk & juice	nothing	nothing	nothing	0	0								North	No
1711	20	487	2015-11-04	2013-02-15	1560	m	1975	Unemployed	High	1970	Employed	University	y	y	0	0	0		15.200	15.2	90.0	0.9	20	30	30	7	30	y	parents' bed	parents' bed	19	19	45	45	nothing	nothing	nothing	nothing	1	0.75								North	Yes
1712	20	487	2015-11-04	2006-12-18	3140	m	1980	Employed	Middle	1982	Employed	Middle	y	y	1	0	0		26.500	26.5	132.0	1.32	22	15	15	7	15	y	own bed	own bed	20	20	15	15	nothing	nothing	nothing	nothing	0	0								North	Yes
1713	10	603	2015-11-04	2011-08-10	3280	m	1983	Employed	Middle	1984	Employed	Middle	y	y	0	1	0		23.500	23.5	109.0	1.09	22	00	0	8	0	c	own bed	own bed	19	19	30	30	milk	nothing	nothing	nothing	0	0								Center	Yes
1715	7	585	2015-11-04	2012-01-02	3380	f	1979	Employed	High	1978	Employed	High	y	y	0	0	0		18.150	18.15	107.0	1.07	23	00	0	9	0	n	outside home	outside home	19	19	30	30	nothing	sweet	nothing	nothing	1	0								Center	No
1716	7	585	2015-11-03	2014-04-02	3760	f	1978	Employed	High	1988	Employed	High	y	n	0	0	2		11.370	11.37	81.0		22	00	0	7	45	n	parents' bed	parents' bed	19	19	0	0	nothing	nothing	nothing	nothing	0	3								Center	No
1717	10	609	2015-11-04	2011-12-20	4130	m	1976	Employed	High	1974	Employed	High	y	y	1	0	1		18.000	18	109.0	1.09	24	00	0	10	0	n	own bed	other room	19	19	15	15	nothing	sweet	nothing	nothing	0	2.5								Center	Yes
1718	10	609	2015-11-04	2011-01-28	4000	f	1976	Employed	University	1970	Employed	University	y	y	1	0	0		18.000	18	105.0	1.05	22	00	0	6	45	y	other room	own bed	19	19	30	30	nothing	nothing	nothing	nothing	0	0								Center	No
1719	9	521	2015-11-04	2010-10-07	4020	m	1976	Employed	High	1972	Employed	High	y	y	0	1	0		19.900	19.9	115.0	1.15	22	00	0	8	0	c	own bed	own bed	18	18	45	45	milk	nothing	nothing	nothing	1	0								North	Yes
1720	9	521	2015-11-04	2013-10-17	3200	f	1976	Employed	High	1972	Employed	High	y	y	1	0	0		11.870	11.87	87.5	0.875	22	00	0	7	45	c	own bed	own bed	18	18	45	45	milk	nothing	nothing	nothing	0	2.75								North	No
1721	15	610	2015-11-04	2005-08-08	2970	f	1970	Employed	High	1963	Unemployed	University	y	y	0	0	2		32.000	32	145.4	1.454	23	00	0	7	30	y	own bed	own bed	21	21	15	15	nothing	nothing	nothing	nothing	0	0								South	No
1722	15	610	2015-11-04	2009-05-25	3000	m	1990	Works at home	Middle	1981	Employed	Middle	y	y	0	1	0		19.000	19	119.0	1.19	21	30	30	7	0	y	own bed	own bed	20	20	0	0	nothing	sweet	nothing	nothing	0	0								South	Yes
1724	9	521	2015-11-04	2006-07-25	3800	f	1970	Employed	Middle	1971	Employed	High	y	y	2	0	0		29.900	29.9	137.0	1.37	21	00	0	7	0	c	own bed	own bed	19	19	30	30	nothing	nothing	nothing	nothing	0	0								North	No
1725	4	491	2015-11-04	2003-12-22	3350	f	1981	Works at home	Middle	1978	Employed	Middle	y	y	0	1	0		29.000	29	136.6	1.366	22	00	0	7	30	y	own bed	own bed	20	20	30	30	nothing		nothing	nothing	0	0								South	No
1726	4	523	2015-11-04	2009-06-09	3000	m	1974	Employed	Middle	1975	Works at home	Middle	y	y	1	1	0		18.000	18	109.0	1.09	21	00	0	7	30	y	own bed	own bed	19	19	30	30	nothing	nothing	nothing	nothing	0	0								South	Yes
1727	4	523	2015-11-04	2006-03-18	2850	f	1974	Works at home	High	1970	Employed	Middle	y	y	1	0	0		27.000	27	125.0	1.25	21	00	0	7	0	y	own bed	own bed	19	19	15	15	milk	nothing	nothing	fruit	1	0								South	No
1728	4	523	2015-11-04	2006-07-20	2930	m	1978	Unemployed	Elementary	1977	Unemployed	Elementary	y	y	2	0	1		35.000	35	137.0	1.37	23	00	0	8	15	n	other room	parents' bed	21	21	15	15	juice	nothing	nothing	nothing	1	0.25								South	Yes
1729	10	609	2015-11-04	2002-12-15	3910	m	1973	Employed	High	1972	Employed	High	y	y	0	1	0		51.500	51.5	166.0	1.66	22	45	45	7	15	y	own bed	own bed	20	20	30	30	nothing	nothing	nothing	nothing	0	0								Center	Yes
1730	7	580	2015-11-04	2010-09-01	3010	m	1979	Other	University				y	y	1	0	1	n	17.000	17	108.0	1.08	23	15	15	10	0	y	other room	own bed	21	21					nothing		1	1								Center	Yes
1731	17	534	2015-11-04	2008-05-14	4310	f	1985	Works at home	High	1976	Employed	High	y	y	0	1	0		28.000	28	131.0	1.31	20	30	30	7	0	y	own bed	own bed	19	19	30	30	nothing	sweet	nothing	nothing	0	0								North	No
1732	17	534	2015-11-04	2004-07-13	2730	f	1978	Employed	High	1964	Employed	University	y	y	0	1	0		35.000	35	148.0	1.48	22	00	0	7	15	c	own bed	own bed	19	19	0	0	nothing	nothing	nothing	nothing	0	0								North	No
1733	4	608	2015-11-04	2011-10-29	3500	m	1985	Works at home	Middle	1982	Employed	Middle	y	y	1	0	0		15.900	15.9	104.4	1.044	22	30	30	7	30	y	parents' bed	parents' bed	20	20	0	0	nothing	nothing	nothing	nothing	2	1.5								South	Yes
1735	4	608	2015-11-04	2008-02-22	3550	m	1970	Works at home	High	1976	Employed	High	y	y	0	1	0		23.300	23.3	127.5	1.275	22	00	0	7	30	y	parents' bed	parents' bed	20	20	0	0	nothing	nothing	nothing	nothing	0	0								South	Yes
1736	4	608	2015-11-04	2012-01-10	2850	f	1977	Works at home	University	1975	Employed	High	y	y	1	0	0		15.500	15.5	103.5	1.035	22	30	30	7	30	y	own bed	own bed	20	20	0	0	nothing	nothing	nothing	nothing	0	1.25								South	No
1737	4	608	2015-11-04	2007-08-15	3010	f	1977	Works at home	University	1975	Employed	High	y	y	0	1	0		20.300	20.3	122.8	1.228	22	30	30	7	30	y	own bed	own bed	20	20	0	0	nothing	nothing	nothing	nothing	0	0								South	No
1738	10	609	2015-11-05	2009-03-26	2940	m	1975	Employed	Middle	1985	Employed	Middle	y	y	1	0	0		28.000	28	125.0	1.25	21	30	30	6	45	y	own bed	own bed	19	19	30	30	juice	nothing	nothing	nothing	0	0								Center	Yes
1740	7	585	2015-11-05	2010-08-27	3220	m	1980	Employed	Middle	1977	Employed	High	y	y	0	1	0		23.300	23.3	111.0	1.11	22	00	0	6	0	c	own bed	own bed	19	19	0	0	nothing	salted	nothing	nothing	1	0								Center	Yes
1741	20	487	2015-11-05	2004-08-06	3690	m	1966	Employed	University	1960	Employed	Middle	y	n	1	0	0		37.000	37	143.0	1.43	22	15	15	7	0	y	own bed	own bed	20	20	0	0	nothing	nothing	nothing	nothing	1	0								North	Yes
1742	9	532	2015-11-05	2003-01-10	3500	m	1967	Employed	University	1964	Unemployed	University	y	n	1	0	1		39.700	39.7	150.0	1.5	22	30	30	7	15	y	own bed	own bed	19	19	30	30	nothing	nothing	nothing	nothing	0	0								North	Yes
1743	20	487	2015-11-05	2009-08-19	3330	f	1977	Employed	High	1975	Employed	High	y	y	0	0	0		21.500	21.5	118.5	1.185	21	30	30	7	15	y	own bed	own bed	19	19	45	45	nothing	nothing	nothing	nothing	1	0								North	No
1744	9	558	2015-11-05	2012-11-15	3320	m	1970	Employed	High	1969	Employed	High	y	y	1	0	4		13.400	13.4	90.5	0.905	22	30	30	7	0	c	own bed	own bed	19	19	30	30	milk	nothing	nothing	nothing	2	0.5								North	Yes
1745	10	603	2015-11-05	2005-10-16	4170	m	1968	Works at home	High	1967	Employed	University	y	y	2	0	0		48.500	48.5	147.5	1.475	21	45	45	7	0	c	own bed	own bed	20	20	15	15	nothing	nothing	nothing	nothing	0	0								Center	Yes
1746	7	585	2015-11-05	2008-06-05	2750	f	1973	Works at home	High	1973	Employed	Middle	y	y	1	1	0		27.750	27.75	119.0	1.19	22	00	0	7	30	y	parents' bed	parents' bed	19	19	30	30	nothing	nothing	nothing	nothing	1	0								Center	No
1747	15	610	2015-11-05	2004-05-10	2200	f	1979	Works at home	Middle	1975	Employed	Middle	y	y	0	1	0		38.000	38	154.0	1.54	22	30	30	7	30	y	own bed	own bed	20	20	0	0	nothing	nothing	nothing	nothing	0	0								South	No
1748	10	603	2015-11-05	2009-10-08	2980	f	1976	Employed	University	1970	Employed	High	y	y	0	1	0		16.500	16.5	112.5	1.125	21	30	30	7	15	y	own bed	own bed	19	19	30	30	nothing	sweet	nothing	nothing	0	0								Center	No
1749	7	585	2015-11-05	2012-11-01	3670	m	1972	Employed	High	1977	Works at home	Middle	y	y	1	0	0		12.050	12.05	95.0	0.95	23	30	30	8	45	c	own bed	own bed	19	19	30	30	nothing	nothing	nothing	nothing	1	2.75								Center	Yes
1750	15	610	2015-11-05	2002-07-23	3550	m	1983	Employed	Middle	1981	Employed	Middle	y	y	0	1	0		36.000	36	147.0	1.47	24	00	0	7	30	y	own bed	own bed	21	21	15	15	nothing	nothing	nothing	nothing	0	0								South	Yes
1751	15	610	2015-11-05	2005-10-31	3350	m	1983	Employed	Middle	1981	Employed	Middle	y	y	1	0	0		24.000	24	124.2	1.242	22	30	30	7	30	y	own bed	own bed	21	21	15	15	milk	nothing	nothing	nothing	0	0								South	Yes
1752	17	534	2015-11-05	2006-03-14	3610	f	1975	Employed	High	1972	Employed	High	y	y	1	1	0		35.000	35	140.0	1.4	21	30	30	7	0	y	other room	other room	19	19	0	0	nothing	nothing	nothing	nothing	0	0								North	No
1753	17	534	2015-11-05	2009-03-06	2250	f	1975	Employed	High	1976	Employed	High	y	y	0	1	1		20.300	20.3	120.0	1.2	20	45	45	6	45	c	own bed	own bed	19	19	15	15	juice	nothing	nothing	nothing	0	0								North	No
1754	4	608	2015-11-05	2009-12-14	4250	m	1969	Works at home	Middle	1972	Employed	Middle	y	y	2	0	0		20.000	20	116.0	1.16	22	00	0	7	30	y	parents' bed	parents' bed	19	19	30	30	milk	nothing	nothing	nothing	0	0								South	Yes
1755	10	603	2015-11-06	2011-11-02	2850	m	1980	Employed	University	1977	Employed	High	y	y	0	1	0		18.000	18	101.0	1.01	23	00	0	8	0	c	own bed	own bed	20	20	0	0	nothing	nothing	nothing	nothing	0	1								Center	Yes
1756	10	603	2015-11-06	2012-04-27	2450	f	1969	Works at home	High	1971	Employed	High	y	y	0	0	0		11.550	11.55	96.0	0.96	23	30	30	8	30	y	other room	own bed	19	19	30	30	nothing	sweet	nothing	nothing	0	2								Center	No
1757	4	523	2015-11-06	2012-04-03	2890	f	1977	Works at home	Middle	1974	Employed	High	y	y	0	0	0		14.500	14.5	89.0	0.89	23	15	15	10	0	y	parents' bed	parents' bed	19	19	0	0	juice	sweet	nothing	nothing	2	0								South	No
1758	15	610	2015-11-06	2013-11-08	2460	m	1974	Employed	High	1974	Employed	High	y	y	0	0	0		11.960	11.96	89.5		20	30	30	7	0	n	other room	parents' bed	19	19	0	0	nothing	nothing	nothing	nothing	2	1								South	Yes
1759	4	491	2015-11-06	2014-09-23	2350	m	1979	Works at home	Middle	1980	Unemployed	High	y	y	0	0	0		12.620	12.62	82.5		23	30	30	9	0	n	parents' bed	parents' bed	19	19	30	30	milk	salted	nothing	nothing	2	3								South	Yes
1760	4	523	2015-11-06	2013-10-28	2860	f	1974	Works at home	Middle	1970	Employed	High	y	y	1	0	0		13.000	13	94.0	0.94	23	15	15	8	30	y	parents' bed	parents' bed	20	20	30	30	milk	sweet	nothing	nothing	2	3								South	No
1761	7	585	2015-11-06	2009-08-12	2840	f	1978	Employed	Middle	1969	Unemployed	Middle	y	y	2	1	0		24.000	24	125.0	1.25	21	00	0	7	0	n	parents' bed	parents' bed	19	19	30	30	nothing	nothing	nothing	nothing	0	1								Center	No
1762	20	487	2015-11-06	2011-01-25	3730	m	1976	Employed	University	1974	Employed	High	y	y	1	0	0		17.000	17	108.0	1.08	21	45	45	7	15	c	parents' bed	parents' bed	19	19	15	15	nothing	nothing	nothing	nothing	2	0.5								North	Yes
1763	20	575	2015-11-06	2007-05-03	2630	f	1969	Employed	High	1968	Employed	Middle	y	y	0	0	0		36.400	36.4	132.2	1.322	21	45	45	7	15	y	other room	own bed	20	20	0	0	nothing	nothing		nothing	0	0								North	No
1764	17	534	2015-11-06	2014-10-23	3640	m	1982	Employed	University	1975	Employed	High	y	y	0	0	0		12.600	12.6	83.0		21	30	30	6	45	y	own bed	own bed	20	20	0	0	nothing	nothing	nothing	nothing	0	1.5								North	Yes
1765	17	534	2015-11-06	2012-04-01	3300	m	1982	Employed	University	1977	Employed	Middle	y	y	0	0	0		14.500	14.5	97.0	0.97	22	30	30	8	0	y	own bed	own bed	19	19	15	15	juice	nothing	nothing	nothing	1	0								North	Yes
1766	7	585	2015-11-06	2008-01-30	3430	f	1975	Employed	High	1976	Employed	High	y	y	1	0	0		27.650	27.65	125.0	1.25	23	15	15	11	0	y	parents' bed	parents' bed	19	19	30	30	milk	sweet	nothing	nothing	0	0								Center	No
1767	20	487	2015-11-06	2008-02-05	3360	m	1973	Employed	University	1970	Employed	University	y	y	0	0	0		28.500	28.5	129.0	1.29	21	30	30	7	0	y	own bed	own bed	20	20	0	0	nothing	fruit	nothing	nothing	0	0								North	Yes
1769	15	541	2015-11-05	2006-12-06	3600	m	1974	Works at home	High	1977	Unemployed	Middle	y	y	1	0	0		42.000	42	130.0	1.3	21	00	0	6	30	c	own bed	own bed	18	18	45	45	nothing	nothing	nothing	nothing	0	1.25								South	Yes
1770	15	541	2015-11-05	2006-12-25	4005	m	1972	Works at home	High	1976	Employed	High	y	y	1	0	0		43.000	43	137.0	1.37	22	15	15	7	30	c	own bed	own bed	19	19	30	30	nothing	nothing	nothing	nothing	0	0								South	Yes
1771	15	541	2015-11-05	2005-06-25	4790	f	1982	Works at home	High	1978	Employed	Middle	y	y	0	3	0		50.000	50	140.0	1.4	22	00	0	6	45	c	own bed	own bed	20	20	30	30	nothing	nothing	nothing	nothing	0	0								South	No
1772	15	610	2015-11-10	2004-11-12	2060	m	1974	Unemployed	Middle	1973	Employed	Elementary	y	n	0	1	0		26.000	26	135.5	1.355	22	00	0	8	30	y	parents' bed	parents' bed	19	19	30	30	nothing	other	nothing	nothing	1	0								South	Yes
1773	9	521	2015-11-10	2006-12-08	3400	m	1971	Works at home	Middle	1965	Employed	Middle	y	y	2	0	0		24.500	24.5	127.0	1.27	21	00	0	7	0	y	other room	own bed	19	19	30	30	nothing	fruit	nothing	nothing	0	0								North	Yes
1774	9	521	2015-11-10	2008-12-27	3350	m	1982	Works at home	High	1978	Employed	University	y	y	0	1	0		18.200	18.2	104.0	1.04	21	45	45	7	0	c	own bed	own bed	19	19	0	0	nothing	nothing	nothing	nothing	0	0								North	Yes
1775	9	532	2015-11-10	2008-05-14	3900	m	1979	Employed	University	1975	Employed	University	y	y	0	1	0		25.000	25	125.0	1.25	22	15	15	7	45	y	own bed	own bed	20	20	0	0	nothing	nothing	nothing	nothing	0	0								North	Yes
1776	10	603	2015-11-10	2005-06-21	3930	m	1977	Employed	University	1972	Employed	High	y	y	0	2	0		46.000	46	142.0	1.42	21	30	30	7	0	c	own bed	own bed	19	19	30	30	nothing	nothing	nothing	nothing	0	0								Center	Yes
1777	9	521	2015-11-10	2013-11-08	2900	m	1980	Employed	University	1974	Employed	University	y	y	1	0	0		11.700	11.7	85.5	0.855	21	30	30	8	0	c	own bed	own bed	18	18	30	30	nothing	nothing	nothing	nothing	3	1.75								North	Yes
1778	20	565	2015-11-10	2011-10-29	1920	f	1980	Employed	High	1975	Employed	High	y	y	0	1	0		18.000	18	108.0	1.08	21	15	15	7	0	y	parents' bed	own bed	19	19	0	0	milk	nothing	nothing	nothing	0	1								North	No
1779	10	603	2015-11-10	2005-06-12	2720	f	1968	Employed	University	1966	Employed	University	y	y	2	1	0		29.500	29.5	124.5	1.245	22	00	0	7	0	c	own bed	own bed	20	20	30	30	nothing	nothing	nothing	nothing	1	0								Center	No
1780	9	532	2015-11-10	2005-07-24	3740	m	1970	Employed	High	1971	Employed	High	y	y	0	1	0		48.000	48	163.0	1.63	22	45	45	7	30	c	own bed	own bed	20	20	0	0	nothing	nothing	nothing	fruit	0	0								North	Yes
1781	7	585	2015-11-10	2007-11-30	4300	m	1970	Works at home	High	1965	Other	Middle	y	n	3	0	0		43.200	43.2	140.0	1.4	24	00	0	10	0	n	parents' bed	parents' bed	20	20	30	30	juice	sweet	nothing	nothing	0	0								Center	Yes
1783	4	491	2015-11-10	2006-02-06	3470	m	1975	Works at home	Middle	1975	Employed	High	y	y	0	1	0		47.000	47	147.0	1.47	20	30	30	6	30	y	own bed	own bed	19	19	0	0	nothing	sweet	nothing	nothing	3	0								South	Yes
1784	10	609	2015-11-10	2002-02-07	3150	m	1972	Works at home	Middle	1971	Employed	Middle	y	y	1	0	0		53.000	53	161.0	1.61	21	30	30	6	45	y	own bed	own bed	20	20	0	0	nothing	nothing	nothing	nothing	0	0								Center	Yes
1785	13	530	2015-11-10	2007-07-19	3510	f	1977	Works at home	University	1971	Employed	High	y	y	0	1	0		23.000	23	129.0	1.29	21	15	15	7	15	y	own bed	own bed	19	19	30	30	nothing	nothing	nothing	nothing	0	0								South	No
1786	13	530	2015-11-10	2009-07-04	3280	f	1977	Works at home	University	1971	Employed	High	y	y	1	0	0		18.000	18	117.5	1.175	21	15	15	7	15	y	own bed	own bed	19	19	30	30	nothing	nothing	nothing	nothing	1	0								South	No
1787	4	608	2015-11-10	2012-02-18	2240	m	1970	Employed	High	1969	Employed	University	y	y	1	0	0		16.200	16.2	104.2	1.042	23	30	30	7	0	c	parents' bed	parents' bed	19	19	0	0	milk	nothing	nothing	nothing	0	1								South	Yes
1788	4	608	2015-11-10	2006-09-19	3750	m	1977	Works at home	Middle	1969	Employed	Middle	y	y	1	1	0		37.300	37.3	145.5	1.455	21	00	0	7	15	c	own bed	own bed	19	19	30	30	nothing	nothing	nothing	nothing	0	0								South	Yes
1789	4	608	2015-11-10	2013-09-02	3720	m	1980	Works at home	Middle	1978	Employed	High	y	y	0	0	0		13.200	13.2	86.3	0.863	0	30	30	10	0	n	parents' bed	own bed	19	19	30	30	milk	sweet	nothing	nothing	2	2								South	Yes
1790	10	603	2015-11-11	2010-06-16	3600	m	1975	Employed	University	1973	Employed	University	y	y	1	0	0		21.500	21.5	113.0	1.13	21	30	30	8	0	c	own bed	own bed	19	19	0	0	nothing	nothing	nothing	nothing	0	0								Center	Yes
1791	7	585	2015-11-11	2011-01-29	3550	f	1986	Works at home	High	1984	Employed	High	y	y	0	0	1		23.100	23.1	109.0	1.09	23	00	0	8	45	n	parents' bed	own bed	19	19	30	30	milk	nothing	nothing	nothing	0	0								Center	No
1792	7	585	2015-11-11	2014-01-25	2260	f	1975	Employed	High	1970	Employed	University	y	y	1	0	0		9.750	9.75	81.0		22	30	30	8	30	c	other room	other room	19	19	0	0	nothing	nothing	nothing	nothing	2	3								Center	No
1793	10	603	2015-11-11	2011-05-11	3120	f	1973	Employed	University	1971	Employed	University	y	y	0	1	2		20.000	20	107.0	1.07	21	45	45	7	30	y	parents' bed	parents' bed	20	20	0	0	milk	nothing	nothing	nothing	1	0.75								Center	No
1794	10	505	2015-11-11	2012-09-09	3860	m	1984	Employed	High	1984	Employed	Middle	y	y	1	0	0		14.500	14.5	94.8	0.948	22	00	0	6	30	c	own bed	own bed	19	19	30	30	nothing	nothing	nothing	nothing	1	2								Center	Yes
1795	20	565	2015-11-11	2004-08-22	2960	f	1973	Works at home	Middle	1972	Employed	Middle	y	y	0	0	0		66.000	66	168.5	1.685	21	15	15	6	45	y	own bed	own bed	19	19	15	15	nothing	nothing	nothing	nothing	1	0								North	No
1796	20	565	2015-11-11	2006-09-15	3330	m	1976	Works at home	High	1973	Employed	High	y	y	1	0	0		32.500	32.5	140.5	1.405	22	00	0	7	15	y	own bed	own bed	20	20	0	0	nothing	sweet	nothing	nothing	1	0								North	Yes
1797	4	523	2015-11-11	2009-11-24	3000	m	1983	Works at home	High	1980	Employed	High	y	y	0	0	0		30.000	30	120.0	1.2	21	00	0	7	15	y	parents' bed	parents' bed	19	19	15	15	nothing	sweet	nothing	nothing	0	0								South	Yes
1799	15	610	2015-11-11	2010-04-28	3500	f	1983	Unemployed	High	1985	Unemployed	Middle	y	y	0	0	0		18.000	18	109.0	1.09	22	00	0	8	0	n	own bed	own bed	20	20	0	0	nothing	nothing	nothing	nothing	0	0								South	No
1800	15	610	2015-11-11	2010-10-04	2980	m	1995	Works at home	Middle				y	n	0	0	5	n	21.000	21	117.0	1.17	23	00	0	7	30	n	own bed	own bed	21	21	0	0	other	salted	nothing	nothing	2	1.5								South	Yes
1801	15	610	2015-11-11	2009-11-04	3400	f	1979	Employed	Middle	1975	Employed	Elementary	y	y	0	0	0		21.000	21	118.8	1.188	22	30	30	7	45	y	own bed	own bed	20	20	30	30	nothing	nothing	nothing	nothing	0	0								South	No
1802	17	534	2015-11-10	2006-11-08	3290	f	1981	Employed	High	1975	Employed	High	y	y	0	1	0		30.000	30	137.0	1.37	21	15	15	7	0	y	own bed	own bed	18	18	45	45	nothing	nothing	nothing	nothing	0	0								North	No
1803	17	534	2015-11-10	2012-07-05	2700	f	1975	Employed	High	1973	Employed	High	y	y	1	0	0		13.000	13	96.0	0.96	21	00	0	7	0	c	own bed	own bed	19	19	0	0	nothing	fruit	nothing	nothing	0	1.25								North	No
1804	15	610	2015-11-11	2002-05-03	3150	f	1966	Employed	High	1969	Employed	High	y	y	0	0	0		53.000	53	163.0	1.63	22	00	0	7	30	y	own bed	own bed	21	21	0	0	nothing	nothing	nothing	nothing	0	0								South	No
1806	4	491	2015-11-11	2003-12-15	3250	f	1974	Works at home	High	1970	Employed	Middle	y	y	2	0	0		26.500	26.5	127.5	1.275	21	30	30	7	15	y	parents' bed	parents' bed	19	19	30	30	milk	nothing	nothing	nothing	1	0								South	No
1807	20	566	2015-11-11	2004-05-03	3540	m	1974	Employed	Middle	1973	Employed	Middle	y	y	1	0	0		43.000	43	143.5	1.435	21	00	0	7	30	y	own bed	own bed					nothing	other	nothing	nothing	1	0								North	Yes
1808	20	566	2015-11-11	2002-10-13	3370	f	1976	Works at home	Middle	1974	Employed	Middle	y	y	0	0	0		44.000	44	161.0	1.61	24	00	0	7	15	y	own bed	own bed					nothing		nothing	nothing	0	0.25								North	No
1809	17	534	2015-11-11	2009-04-24	1200	m	1973	Other	High	1963	Employed	Middle	n	y	0	0	1		23.000	23	112.0	1.12	20	30	30	6	45	y	own bed	parents' bed	19	19	0	0	juice	salted & sweet	nothing	nothing	1	0								North	Yes
1810	17	534	2015-11-11	2009-05-14	2970	f	1981	Employed	High	1975	Employed	High	y	y	1	0	0		20.000	20	119.0	1.19	20	45	45	7	15	y	own bed	own bed	18	18	45	45	nothing	nothing	nothing	nothing	0	0								North	No
1811	4	608	2015-11-11	2010-07-06	3750	m	1975	Employed	High	1979	Employed	High	y	y	0	1	0		19.200	19.2	114.0	1.14	22	00	0	7	30	y	own bed	parents' bed	19	19	0	0	milk	nothing	nothing	nothing	2	0								South	Yes
1812	4	608	2015-11-11	2013-04-29	2630	m	1983	Works at home	High	1982	Employed	Middle	y	y	1	0	0		12.920	12.92	92.0	0.92	21	30	30	6	30	c	parents' bed	own bed	19	19	0	0	milk	sweet	nothing	nothing	3	2								South	Yes
1813	4	608	2015-11-11	2010-02-05	2900	f	1981	Works at home	Middle	1976	Employed	High	y	y	1	1	0		24.900	24.9	118.9	1.189	21	30	30	7	15	c	other room	own bed	19	19	0	0	milk	nothing	nothing	nothing	1	0								South	No
1814	4	608	2015-11-11	2008-07-01	2750	f	1981	Works at home	Middle	1978	Employed	Middle	y	y	1	0	0		32.300	32.3	125.4	1.254	23	00	0	7	15	c	other room	own bed	20	20	0	0	juice	nothing	nothing	nothing	1	0								South	No
1815	4	608	2015-11-11	2010-03-09	2950	f	1986	Works at home	High	1988	Employed	Middle	y	y	0	1	0		20.000	20	111.5	1.115	21	00	0	7	15	y	own bed	own bed	19	19	0	0	other	sweet	nothing	nothing	0	0								South	No
1816	10	609	2015-11-12	2012-06-22	3640	m	1978	Works at home	High	1974	Employed	Middle	y	y	1	0	0		14.000	14	95.0	0.95	22	30	30	7	45	y	other room	own bed	20	20	0	0	nothing	other	nothing	nothing	1	3								Center	Yes
1817	4	564	2015-05-21	2009-10-17	3340	f	1979	Works at home	High	1974	Employed	Elementary	y	y	0	1	0		21.000	21	109.0	1.09	22	30	30	7	30	c	parents' bed	parents' bed	20	20	0	0	nothing	nothing	nothing	nothing	0	0								South	No
1818	4	564	2015-05-21	2011-05-14	3810	m	1979	Works at home	High	1974	Employed	Elementary	y	y	1	0	0		17.000	17	104.5	1.045	21	45	45	7	30	c	parents' bed	own bed	20	20	0	0	nothing	nothing	nothing	nothing	3	0								South	Yes
1820	4	564	2015-11-03	2006-08-20	3250	f	1976	Unemployed	High	1978	Employed	Middle	y	y	0	1	0		26.300	26.3	122.5	1.225	23	00	0	7	30	c	own bed	own bed	20	20	0	0	other	nothing	nothing	nothing	0	0								South	No
1821	4	564	2015-11-03	2004-08-16	2520	f	1967	Employed	High	1969	Employed	High	y	y	0	1	0		34.500	34.5	143.0	1.43	22	15	15	6	30	y	own bed	own bed	20	20	30	30	nothing	nothing	nothing	nothing	0	0								South	No
1822	9	553	2015-11-12	2011-03-01	2510	m	1969	Employed	University	1974	Employed	High	y	y	0	0	0		16.900	16.9	107.2	1.072	21	30	30	7	30	n	other room	parents' bed	20	20	0	0	juice	nothing	nothing	nothing	0	2								North	Yes
1823	7	585	2015-11-12	2014-07-10	2800	m	1981	Works at home	High	1978	Employed	Middle	y	y	1	0	0		9.850	9.85	81.0		21	30	30	7	30	n	own bed	own bed	19	19	30	30	nothing	nothing	nothing	nothing	1	1.75								Center	Yes
1824	4	564	2015-11-03	2007-07-28	2900	m	1967	Employed	High	1969	Employed	High	y	y	1	0	0		23.500	23.5	123.2	1.232	22	15	15	6	30	y	own bed	own bed	20	20	30	30	nothing	nothing	nothing	nothing	0	0								South	Yes
1825	4	564	2015-11-03	2013-10-29	3450	f	1975	Other	High	1976	Employed	High	y	y	1	0	0		11.800	11.8	86.0	0.86	21	15	15	7	15	c	own bed	parents' bed	19	19	30	30	milk	nothing	nothing	nothing	1	1								South	No
1826	4	564	2015-11-03	2010-01-16	3300	f	1975	Other	High	1976	Employed	High	y	y	0	1	0		22.300	22.3	113.3	1.133	21	15	15	7	30	c	own bed	own bed	19	19	30	30	nothing	nothing	nothing	nothing	0	0								South	No
1828	4	491	2015-11-12	2011-08-22	2950	f	1977	Works at home	Middle	1972	Employed	Middle	y	y	0	1	0		14.500	14.5	98.0	0.98	21	30	30	6	30	n	own bed	own bed	19	19	30	30	nothing	nothing	nothing	nothing	2	0								South	No
1829	4	564	2015-11-03	2010-07-30	2890	m	1975	Other	University	1974	Other	University	y	y	1	0	0		16.000	16	101.9	1.019	21	30	30	7	15	y	parents' bed	parents' bed	20	20	0	0	nothing	nothing	nothing	nothing	0	0								South	Yes
1830	4	564	2015-11-03	2005-12-23	4130	m	1975	Other	University	1972	Other	University	y	y	0	1	0		40.000	40	148.0	1.48	22	00	0	7	0	c	own bed	own bed	20	20	0	0	nothing	nothing	nothing	nothing	0	0								South	Yes
1831	4	564	2015-11-03	2009-10-10	2990	f	1975	Other	University	1972	Other	University	y	y	1	0	0		22.300	22.3	114.8	1.148	21	15	15	7	0	c	own bed	own bed	20	20	0	0	nothing	nothing	nothing	nothing	0	0								South	No
1832	4	564	2015-11-04	2013-05-08	2590	f	1981	Unemployed	University	1979	Employed	High	y	y	0	0	0		11.400	11.4	89.0	0.89	23	00	0	8	30	c	own bed	own bed	20	20	0	0	nothing	nothing	nothing	nothing	0	2.25								South	No
1833	4	564	2015-11-04	2013-05-08	3150	m	1981	Unemployed	University	1979	Employed	High	y	y	0	0	0		12.700	12.7	92.0	0.92	23	00	0	8	30	c	own bed	own bed	20	20	0	0	nothing	sweet	nothing	nothing	0	2.25								South	Yes
1834	4	564	2015-11-04	2009-06-24	3200	m	1978	Works at home	High	1974	Employed	High	y	y	1	0	0		17.400	17.4	108.2	1.082	21	45	45	7	45	c	own bed	own bed	20	20	0	0	juice	nothing	nothing	nothing	1	0								South	Yes
1835	4	564	2015-11-06	2004-10-16	3800	f	1972	Works at home	Middle	1972	Employed	Middle	y	y	1	0	0		60.000	60	162.0	1.62	21	00	0	6	0	y	parents' bed	own bed	20	20	0	0	nothing	nothing	nothing	nothing	0	0								South	No
1836	4	564	2015-11-06	2005-11-06	3470	m	1968	Employed	High	1970	Other	High	y	y	0	0	0		30.400	30.4	129.8	1.298	22	30	30	6	45	y	own bed	parents' bed	20	20	0	0	nothing	nothing	nothing	nothing	0	0								South	Yes
1837	4	564	2015-11-10	2005-07-21	2900	f	1978	Works at home	High	1973	Other	Middle	y	y	0	1	0		33.100	33.1	145.0	1.45	23	00	0	7	15	c	own bed	own bed	20	20	0	0	nothing	nothing	nothing	nothing	0	0								South	No
1838	4	564	2015-11-10	2009-03-25	2700	m	1978	Works at home	High	1973	Other	Middle	y	y	0	1	0		26.100	26.1	123.9	1.239	23	00	0	7	15	c	own bed	own bed	20	20	0	0	nothing	sweet	nothing	nothing	0	0								South	Yes
1839	7	585	2015-11-12	2011-11-25	3510	f	1990	Employed	High	1985	Employed	High	y	y	0	0	0		17.900	17.9	104.5	1.045	23	30	30	9	0	y	other room	other room	19	19	45	45	nothing	salted	nothing	nothing	2	1								Center	No
1840	10	603	2015-11-12	2003-01-23	3200	m	1968	Works at home	High	1964	Employed	High	y	y	0	1	0		47.000	47	155.0	1.55	22	00	0	6	45	c	own bed	own bed	20	20	0	0	nothing	nothing	nothing	nothing	2	0								Center	Yes
1841	15	610	2015-11-12	2009-10-11	2170	f	1987	Works at home	Middle	1989	Employed	Middle	y	y	0	1	0		20.000	20	111.6	1.116	22	30	30	7	30	y	outside home	own bed	20	20	30	30	other	nothing	nothing	nothing	0	0								South	No
1842	15	610	2015-11-12	2009-10-11	2300	f	1987	Works at home	Middle	1989	Employed	Middle	y	y	0	1	0		26.000	26	113.2	1.132	22	30	30	7	30	y	outside home	own bed	20	20	30	30	other	nothing	nothing	nothing	0	0								South	No
1843	10	603	2015-11-12	2008-10-03	3290	f	1976	Unemployed	High	1969	Employed	Middle	y	y	1	0	0		22.000	22	121.0	1.21	21	45	45	7	45	y	parents' bed	own bed	20	20	0	0	nothing	nothing	nothing	nothing	0	0								Center	No
1844	15	610	2015-11-12	2008-05-19	3200	f	1977	Employed	Middle				y	n	0	0	0	n	21.000	21	121.0	1.21	21	30	30	7	30	n	other room	own bed	20	20	0	0	nothing	nothing	nothing	nothing	0	0								South	No
1845	15	610	2015-11-12	2011-09-12	3520	m	1987	Works at home	Middle	1988	Employed	Middle	y	y	0	1	0		17.000	17	103.5	1.035	20	00	0	7	30	n	parents' bed	parents' bed	19	19	0	0	nothing	sweet	nothing	nothing	0	0								South	Yes
1846	7	585	2015-11-12	2012-07-23	3300	m	1978	Employed	University	1972	Employed	University	y	y	0	0	0		15.650	15.65	97.0	0.97	22	30	30	7	30	y	other room	other room	19	19	30	30	nothing	nothing	nothing	nothing	2	1.5								Center	Yes
1847	10	603	2015-11-12	2007-06-26	3380	f	1969	Employed	High	1968	Employed	High	y	y	1	0	0		24.000	24	132.0	1.32	22	30	30	7	30	c	other room	parents' bed	20	20	0	0	nothing	nothing	nothing	nothing	0	0								Center	No
1848	9	511	2015-11-12	2005-01-13	3550	f	1979	Employed	High	1976	Employed	Middle	y	y	0	1	0		35.300	35.3	147.0	1.47	22	00	0	7	15	y	own bed	own bed	20	20	0	0	nothing	nothing	nothing	nothing	0	0								North	No
1849	17	534	2015-11-12	2011-09-01	3100	f	1987	Employed	High	1982	Employed	High	y	y	1	0	0		14.000	14	104.0	1.04	21	15	15	6	45	c	own bed	parents' bed	19	19	15	15	nothing	nothing	nothing	nothing	1	0								North	No
1850	17	534	2015-11-12	2010-05-25	3160	m	1972	Works at home	High	1960	Employed	High	y	y	0	0	0		21.000	21	116.0	1.16	21	00	0	7	15	y	parents' bed	parents' bed	19	19	30	30	nothing	fruit	nothing	nothing	1	0								North	Yes
1851	4	608	2015-11-12	2010-02-12	3560	f	1980	Employed	High	1976	Employed	Middle	y	y	0	1	0		23.500	23.5	117.5	1.175	22	30	30	8	30	y	parents' bed	own bed	19	19	0	0	nothing	sweet	nothing	nothing	0	0								South	No
1852	4	608	2015-11-12	2005-06-09	3200	f	1977	Works at home	Middle	1971	Unemployed	Middle	y	y	1	0	0		37.000	37	145.3	1.453	23	00	0	7	30	c	own bed	own bed	19	19	0	0	nothing	nothing	nothing	nothing	0	0								South	No
1853	4	608	2015-11-12	2014-10-09	3250	m	1978	Works at home	High	1974	Employed	High	y	y	2	0	0		10.270	10.27	78.2		22	15	15	7	0	n	parents' bed	own bed	19	19	0	0	milk	sweet	nothing	nothing	5	3	y							South	Yes
1855	9	553	2015-11-13	2010-12-31	3350	m	1971	Works at home	High	1973	Employed	University	y	y	1	0	0		17.300	17.3	105.0	1.05	21	15	15	7	15	c	parents' bed	parents' bed	19	19	30	30	nothing	nothing	nothing	nothing	2	0								North	Yes
1856	10	505	2015-11-13	2009-05-30	3640	m	1975	Employed	University	1971	Employed	University	y	y	0	1	0		23.000	23	117.0	1.17	21	30	30	7	15	c	own bed	own bed	19	19	30	30	nothing	sweet	nothing	nothing	0	0								Center	Yes
1857	9	553	2015-11-13	2009-05-12	2950	f	1978	Employed	High	1977	Employed	High	y	y	0	0	0		22.000	22	117.8	1.178	22	00	0	7	30	y	own bed	own bed	20	20	0	0	nothing	nothing	nothing	nothing	0	0								North	No
1858	9	553	2015-11-13	2011-08-13	2830	m	1982	Works at home	Middle	1979	Employed	High	y	y	0	1	0		18.000	18	107.7	1.077	21	30	30	7	15	y	own bed	own bed	19	19	15	15	nothing	nothing	nothing	nothing	1	1								North	Yes
1859	10	609	2015-11-13	2009-05-05	3300	m	1978	Works at home	High	1974	Employed	Middle	y	y	0	0	0		21.000	21	116.0	1.16	22	45	45	7	0	y	own bed	own bed	20	20	0	0	milk	nothing	nothing	nothing	1	0								Center	Yes
1860	9	553	2015-11-13	2014-10-05	2900	f	1983	Unemployed	High	1982	Employed	Middle	y	y	1	0	0		9.500	9.5	80.0		20	30	30	7	15	n	own bed	own bed	18	18	45	45	nothing	nothing	nothing	nothing	2	4								North	No
1862	9	553	2015-11-13	2011-05-02	2750	f	1983	Unemployed	High	1982	Employed	Middle	y	y	0	1	0		15.000	15	110.0	1.1	20	30	30	6	30	y	other room	own bed	18	18	45	45	nothing	nothing	nothing	nothing	0	0								North	No
1863	7	585	2015-11-13	2012-11-30	3350	f	1986	Employed	High	1980	Employed	High	y	y	0	0	0		15.950	15.95	97.0	0.97	23	45	45	8	30	n	parents' bed	parents' bed	21	21	0	0	nothing	nothing	nothing	nothing	1	1.5								Center	No
1864	10	609	2015-11-13	2008-01-27	3150	m	1976	Employed	High	1976	Employed	High	y	y	0	1	0		30.000	30	131.0	1.31	22	45	45	7	30	y	own bed	own bed	20	20	0	0	nothing	nothing	nothing	nothing	0	0								Center	Yes
1865	10	603	2015-11-13	2008-08-25	4000	m	1966	Employed	Middle	1972	Employed	High	y	y	0	0	0		26.500	26.5	122.0	1.22	21	00	0	6	30	n	parents' bed	parents' bed	19	19	0	0	milk	nothing	nothing	nothing	0	0								Center	Yes
1866	17	534	2015-11-13	2013-09-19	2100	m	1984	Works at home	High	1983	Employed	High	y	y	1	0	0		11.000	11	87.0	0.87	20	30	30	6	45	c	other room	parents' bed	18	18	0	0	nothing	fruit	nothing	nothing	1	1								North	Yes
1867	17	534	2015-11-13	2008-05-23	2720	f	1978	Employed	High	1973	Employed	High	y	y	0	1	0		23.000	23	122.0	1.22	20	45	45	7	0	c	own bed	own bed	18	18	30	30	milk	nothing	nothing	nothing	0	0								North	No
1868	7	585	2015-11-13	2007-07-07	3930	m	1977	Employed	High	1972	Employed	High	y	y	0	2	0		29.500	29.5	136.0	1.36	21	00	0	5	45	y	own bed	own bed	19	19	30	30	nothing	nothing	nothing	nothing	0	0								Center	Yes
1869	4	564	2015-11-10	2005-10-13	2270	f	1978	Unemployed	High	1976	Other	High	y	y	0	1	0		56.200	56.2	145.2	1.452	21	00	0	7	0	c	own bed	own bed	19	19	30	30	nothing	nothing	nothing	nothing	0	0								South	No
1870	4	564	2015-11-10	2010-04-17	2600	m	1978	Unemployed	High	1976	Other	High	y	y	1	0	0		20.000	20	117.0	1.17	21	00	0	7	0	c	own bed	own bed	19	19	30	30	nothing	nothing	nothing	nothing	0	0								South	Yes
1871	4	564	2015-11-10	2007-10-03	2740	m	1978	Works at home	High	1977	Employed	High	y	y	0	1	0		28.500	28.5	129.5	1.295	21	30	30	6	30	c	own bed	own bed	20	20	15	15	nothing	nothing	nothing	nothing	0	0								South	Yes
1872	4	564	2015-11-10	2011-02-15	3240	m	1978	Works at home	High	1977	Employed	High	y	y	1	0	0		15.900	15.9	101.0	1.01	21	00	0	7	30	c	other room	own bed	20	20	15	15	nothing	nothing	nothing	nothing	0	0								South	Yes
1874	13	606	2015-11-11	2006-09-21	2700	m	1975	Unemployed	High	1974	Employed	High	y	y	1	0	0		19.000	19	128.0	1.28	21	00	0	6	30	y	own bed	own bed	20	20	0	0	nothing	nothing	nothing	nothing	0	0								South	Yes
1875	13	606	2015-11-11	2014-07-06	2700	m	1981	Employed	University	1982	Employed	University	y	y	1	0	0		10.400	10.4	78.0		21	45	45	7	0	n	own bed	parents' bed	19	19	30	30	milk	nothing	nothing	nothing	4	2								South	Yes
1876	13	606	2015-11-06	2005-03-21	2680	f	1975	Unemployed	High	1974	Employed	High	y	y	0	1	0		29.000	29	136.0	1.36	22	00	0	6	45	y	own bed	own bed	20	20	30	30	nothing	nothing	nothing	nothing	0	0								South	No
1877	13	606	2015-11-11	2009-01-22	2840	m	1975	Employed	High	1967	Employed	High	y	y	0	0	0		16.000	16	111.0	1.11	21	30	30	7	0	y	own bed	own bed	19	19	30	30	nothing	nothing	nothing	nothing	0	0								South	Yes
1878	13	606	2015-11-11	2007-09-12	2250	f	1980	Works at home	University	1981	Employed	High	y	y	0	1	0		28.000	28	126.0	1.26	21	00	0	7	0	c	own bed	own bed	19	19	0	0	nothing	nothing	nothing	nothing	0	0								South	No
1879	13	606	2015-11-11	2011-04-21	3100	m	1980	Works at home	University	1981	Employed	High	y	y	1	0	0		18.000	18	110.0	1.1	21	00	0	7	0	c	own bed	own bed	19	19	0	0	nothing	nothing	nothing	nothing	1	0								South	Yes
1880	13	606	2015-11-03	2013-03-27	2600	f	1973	Employed	High	1969	Employed	High	y	y	1	0	0		10.750	10.75	84.0	0.84	22	30	30	7	0	y	own bed	own bed	20	20	30	30	nothing	nothing	nothing	nothing	1	3								South	No
1881	13	606	2015-11-03	2014-04-30	3220	f	1982	Employed	High	1977	Employed	High	y	y	1	0	0		10.400	10.4	82.0		21	30	30	7	45	c	own bed	own bed	19	19	45	45	milk	nothing	milk	nothing	1	2								South	No
1882	13	606	2015-11-04	2008-04-17	3970	m	1977	Works at home	High	1975	Employed	High	y	y	1	0	0		35.000	35	136.0	1.36	22	00	0	7	30	c	own bed	own bed	20	20	0	0	nothing	nothing	nothing	nothing	0	0								South	Yes
1883	13	606	2015-11-04	2004-07-11	4050	m	1977	Works at home	High	1975	Employed	High	y	y	0	1	0		56.000	56	155.0	1.55	22	30	30	7	0	c	own bed	own bed	20	20	0	0	nothing	nothing	nothing	nothing	0	0								South	Yes
1884	13	606	2015-11-04	2006-11-22	3120	f	1967	Works at home	Elementary	1960	Unemployed	Middle	y	y	0	0	0		39.000	39	130.0	1.3	22	00	0	6	15	y	own bed	own bed	19	19	0	0	nothing	other	nothing	nothing	0	0								South	No
1885	13	606	2015-11-05	2013-12-27	2700	m	1990	Works at home	Middle	1982	Unemployed	Middle	y	y	1	0	0		12.250	12.25	87.0		22	30	30	8	0	c	parents' bed	own bed	19	19	30	30	milk	sweet	nothing	nothing	1	2								South	Yes
1886	13	606	2015-11-05	2005-09-26	3100	f	1968	Works at home	Middle	1967	Employed	Middle	y	y	1	0	0		42.000	42	141.0	1.41	21	00	0	8	0	c	own bed	own bed	20	20	30	30	nothing	nothing	nothing	nothing	0	0								South	No
1887	13	606	2015-11-06	2006-10-20	3200	f	1974	Employed	High	1973	Employed	University	y	y	0	1	0		24.000	24	126.0	1.26	22	30	30	7	30	c	own bed	own bed	19	19	30	30	nothing	nothing	nothing	nothing	0	0								South	No
1888	13	606	2015-11-06	2006-09-10	2840	f	1969	Works at home	Middle	1960	Employed	High	y	y	2	0	0		24.000	24	127.0	1.27	22	00	0	7	15	c	parents' bed	own bed	20	20	30	30	nothing	nothing	nothing	nothing	0	1.5								South	No
1889	13	606	2015-11-04	2008-05-19	3410	m	1977	Employed	High	1977	Employed	High	y	y	0	1	0		41.500	41.5	130.0	1.3	22	30	30	6	45	y	own bed	own bed	20	20	0	0	nothing	nothing	nothing	nothing	0	0								South	Yes
1890	9	521	2015-11-17	2014-08-12	2830	f	1994	Employed	High	1988	Employed	High	y	y	0	0	0		9.060	9.06	72.5		22	00	0	9	0	n	parents' bed	parents' bed	19	19	30	30	nothing	nothing	milk	nothing	1	3								North	No
1891	15	610	2015-11-17	2013-11-15	2930	m	1980	Employed	High	1979	Employed	High	y	y	1	0	0		11.680	11.68	88.0	0.88	22	00	0	7	0	y	own bed	own bed	19	19	30	30	milk	sweet	nothing	nothing	0	2								South	Yes
1892	10	603	2015-11-17	2008-11-19	3400	f	1987	Unemployed	High	1986	Unemployed	High	y	n	0	0	2		35.500	35.5	131.0	1.31	21	30	30	7	0	n	parents' bed	parents' bed	20	20	0	0	nothing	nothing	nothing	nothing	0	0								Center	No
1893	10	603	2015-11-17	2003-02-08	3040	m	1972	Employed	University	1970	Employed	University	y	y	0	0	0		45.000	45	160.0	1.6	22	00	0	7	0	y	other room	own bed	20	20	0	0	nothing	nothing	nothing	nothing	0	0								Center	Yes
1894	9	521	2015-11-17	2008-10-06	3550	m	1974	Employed	High	1972	Employed	Middle	y	y	2	0	0		24.900	24.9	128.0	1.28	21	45	45	7	30	c	own bed	own bed	20	20	15	15	nothing	nothing	nothing	nothing	0	0								North	Yes
1895	10	609	2015-11-17	2007-02-17	2650	m	1972	Employed	High	1969	Employed	High	y	y	1	0	0		27.500	27.5	131.0	1.31	22	30	30	7	15	y	parents' bed	own bed	20	20	15	15	nothing	fruit	nothing	nothing	0	0								Center	Yes
1896	10	609	2015-11-17	2013-06-28	3580	m	1984	Employed	Middle	1988	Works at home	High	y	y	0	0	1		13.000	13	90.0	0.9	1	00	0	11	0	n	parents' bed	own bed	19	19	45	45	milk	fruit	nothing	nothing	0	1.25								Center	Yes
1897	9	521	2015-11-17	2010-01-26	2970	f	1982	Employed	High	1973	Employed	Middle	y	y	0	0	0		25.250	25.25	117.0	1.17	20	30	30	6	30	y	parents' bed	own bed	19	19	0	0	nothing	nothing	nothing	nothing	0	0								North	No
1898	10	609	2015-11-17	2010-12-30	3650	m	1978	Employed	High	1978	Employed	High	y	y	0	0	0		18.500	18.5	105.0	1.05	21	30	30	7	30	y	parents' bed	own bed	20	20	0	0	juice	nothing	nothing	nothing	1	0								Center	Yes
1899	10	609	2015-11-17	2012-08-04	3238	m	1981	Employed	High	1970	Employed	Middle	y	y	0	0	0		16.000	16	96.0	0.96	23	00	0	7	30	n	parents' bed	parents' bed	19	19	30	30	milk	nothing	nothing	nothing	1	1.25								Center	Yes
1900	4	491	2015-11-17	2010-02-15	3150	m	1976	Employed	University	1976	Employed	High	y	y	0	0	0		24.500	24.5	118.5	1.185	22	30	30	7	30	y	parents' bed	own bed	19	19	30	30	nothing	nothing	nothing	nothing	2	0								South	Yes
1901	7	585	2015-11-17	2014-02-07	2650	f	1977	Employed	University	1979	Works at home	High	y	y	0	0	0		12.300	12.3	83.0		23	00	0	7	0	n	own bed	own bed	20	20	0	0	nothing	nothing	nothing	nothing	0	2								Center	No
1902	7	585	2015-11-17	2010-01-16	3530	m	1965	Employed	High	1987	Works at home	Elementary	y	y	1	0	0		20.800	20.8	120.0	1.2	22	00	0	7	0	c	own bed	parents' bed	19	19	15	15	nothing	salted	nothing	nothing	1	0								Center	Yes
1903	17	534	2015-11-17	2003-06-24	3510	f	1968	Employed	High	1965	Employed	High	y	y	1	0	0		50.000	50	156.0	1.56	22	00	0	7	0	y	own bed	own bed	19	19	45	45	nothing	fruit	nothing	nothing	1	0								North	No
1904	17	534	2015-11-17	2007-03-15	2990	f	1970	Works at home	High	1971	Employed	High	y	y	0	1	0		37.000	37	136.0	1.36	21	30	30	7	0	y	parents' bed	parents' bed	20	20	0	0	nothing	nothing	nothing	nothing	0	0								North	No
1905	7	585	2015-11-18	2010-04-17	2890	f	1979	Works at home	University	1974	Employed	High	y	y	0	1	2		22.000	22	112.0	1.12	21	30	30	7	30	n	parents' bed	parents' bed	19	19	30	30	nothing	nothing	nothing	nothing	0	1.5								Center	No
1906	10	603	2015-11-18	2012-11-10	3500	m	1979	Employed	High	1979	Employed	High	y	y	0	0	0		13.750	13.75	93.0	0.93	23	00	0	8	0	y	other room	own bed	20	20	0	0	nothing	sweet	nothing	nothing	1	2								Center	Yes
1907	13	530	2015-11-18	2014-11-06	3390	m	1976	Unemployed	High	1970	Employed	High	y	y	3	0	0		11.380	11.38	81.0		21	30	30	7	0	n	own bed	own bed	19	19	0	0	nothing	nothing	milk	nothing	1	2								South	Yes
1908	7	585	2015-11-18	2008-02-10	3730	m	1970	Employed	High	1970	Employed	Middle	y	y	1	0	0		33.800	33.8	129.0	1.29	22	00	0	8	30	y	parents' bed	parents' bed	19	19	45	45	juice	salted	nothing	nothing	0	0								Center	Yes
1909	13	530	2015-11-18	2012-02-13	3000	f	1982	Employed	High	1984	Employed	Middle	y	y	0	0	0		16.000	16	105.0	1.05	23	15	15	8	30	n	parents' bed	parents' bed	20	20	45	45	nothing	nothing	nothing	nothing	1	1.25								South	No
1910	10	609	2015-11-18	2013-11-06	3010	f	1985	Employed	High	1985	Employed	Middle	y	y	0	0	0		11.600	11.6	86.0	0.86	23	00	0	10	0	n	own bed	own bed	20	20	0	0	milk	nothing	nothing	nothing	1	2								Center	No
1911	10	603	2015-11-18	2007-10-24	3700	m	1969	Employed	University	1968	Employed	Middle	y	y	1	0	0		37.000	37	132.0	1.32	22	00	0	7	30	c	own bed	own bed	20	20	0	0	nothing	nothing	nothing	nothing	0	0								Center	Yes
1912	9	558	2015-11-18	2010-08-11	2680	f	1976	Employed	High	1975	Employed	High	y	y	0	0	4		18.500	18.5	103.5	1.035	21	30	30	7	0	y	own bed	own bed	19	19	30	30	nothing	sweet	nothing	nothing	0	0								North	No
1913	4	523	2015-11-18	2011-09-07	3970	m	1985	Works at home	High	1978	Unemployed	Middle	y	y	1	0	0		14.500	14.5	102.0	1.02	20	30	30	7	0	y	parents' bed	parents' bed	19	19	0	0	nothing	nothing	nothing	nothing	2	0								South	Yes
1914	4	523	2015-11-18	2009-08-23	2580	f	1985	Works at home	High	1978	Unemployed	Middle	y	y	0	1	0		18.000	18	111.0	1.11	20	30	30	7	0	y	parents' bed	parents' bed	19	19	15	15	nothing	nothing	nothing	nothing	0	0								South	No
1915	15	610	2015-11-18	2007-01-08	2950	f	1974	Employed	Middle	1973	Employed	High	y	n	0	0	2		21.000	21	127.0	1.27	23	00	0	7	15	n	parents' bed	parents' bed	20	20	30	30	nothing	nothing	nothing	nothing	0	0								South	No
1917	7	613	2015-11-18	2007-08-18	3620	f	1981	Works at home	High	1976	Employed	High	y	y	0	1	0		23.200	23.2	131.0	1.31	22	15	15	7	15	y	own bed	own bed	20	20	0	0	nothing	nothing	nothing	nothing	0	0								Center	No
1918	7	613	2015-11-18	2011-09-11	4200	f	1968	Employed	University	1966	Employed	University	y	y	2	0	0		21.000	21	111.0	1.11	21	30	30	7	30	y	other room	own bed	20	20	0	0	nothing	nothing	nothing	nothing	0	0								Center	No
1919	4	491	2015-11-18	2009-06-17	2720	m	1981	Employed	Middle	1976	Employed	High	y	y	0	0	0		20.000	20	113.0	1.13	24	00	0	7	45	n											0	0								South	Yes
1920	20	499	2015-11-18	2004-09-06	2520	f	1975	Employed	High	1970	Employed	High	y	y	1	1	0		33.900	33.9	143.0	1.43	21	45	45	7	0	c	own bed	own bed	20	20	0	0	nothing	nothing	nothing	nothing	0	0								North	No
1921	20	499	2015-11-18	2004-09-06	2500	f	1975	Employed	High	1970	Employed	High	y	y	1	1	0		37.500	37.5	145.0	1.45	22	00	0	7	0	y	own bed	own bed	20	20	0	0	nothing	nothing	nothing	nothing	0	0								North	No
1922	17	534	2015-11-18	2006-08-31	3560	m	1982	Employed	High	1974	Unemployed	High	y	y	0	2	1		29.300	29.3	142.0	1.42	20	30	30	6	15	c	own bed	own bed	19	19	0	0	nothing	nothing	nothing	nothing	0	0								North	Yes
1923	17	534	2015-11-18	2007-10-06	3580	f	1982	Works at home	High	1974	Employed	Middle	y	y	1	1	0		25.000	25	125.0	1.25	21	30	30	7	30	c	other room	own bed	19	19	15	15	nothing	nothing	nothing	nothing	0	0								North	No
1924	4	608	2015-11-18	2011-08-30	3500	m	1981	Works at home	High	1977	Employed	High	y	y	0	0	2		20.500	20.5	104.6	1.046	21	30	30	7	0	y	parents' bed	own bed	19	19	0	0	milk	nothing	nothing	nothing	5	0								South	Yes
1925	4	608	2015-11-18	2010-09-20	3370	m	1974	Employed	University	1971	Employed	University	y	y	2	0	0		25.700	25.7	117.6	1.176	23	30	30	9	0	c	own bed	own bed	19	19	30	30	nothing	sweet	nothing	nothing	0	2								South	Yes
1926	4	608	2015-11-18	2010-05-06	3330	m	1982	Works at home	Middle	1976	Unemployed	Middle	y	y	0	0	0		20.500	20.5	115.9	1.159	22	30	30	7	30	n	parents' bed	parents' bed	19	19	0	0	milk	fruit	nothing	nothing	1	2								South	Yes
1927	4	608	2015-11-18	2010-04-27	4020	f	1982	Works at home	Middle	1980	Employed	Middle	y	y	1	0	0		33.000	33	122.5	1.225	19	30	30	7	0	c	parents' bed	parents' bed	18	18	30	30	nothing	nothing	nothing	nothing	0	0								South	No
1928	7	613	2015-11-19	2014-07-25	3470	m	1976	Works at home	High	1974	Employed	High	y	y	1	0	0		10.700	10.7	83.0		21	45	45	8	15	n	parents' bed	parents' bed	20	20	0	0	nothing	nothing	milk	nothing	2	2								Center	Yes
1929	7	613	2015-11-19	2011-10-25	2850	m	1976	Employed	High	1979	Employed	High	y	y	0	0	0		14.200	14.2	97.5	0.975	20	00	0	6	30	n	parents' bed	own bed	19	19	30	30	nothing	nothing	nothing	nothing	1	0								Center	Yes
1930	7	613	2015-11-19	2013-07-09	3000	m	1987	Works at home	High	1981	Employed	Middle	y	y	1	0	0		13.000	13	91.0	0.91	21	00	0	8	0	n	parents' bed	parents' bed	19	19	45	45	nothing	sweet	nothing	nothing	3	2								Center	Yes
1931	7	585	2015-11-19	2012-12-06	3240	f	1974	Works at home	High	1976	Employed	High	y	y	0	0	0		12.250	12.25	97.0	0.97	20	15	15	7	15	y	parents' bed	parents' bed	19	19	15	15	nothing	nothing	nothing	nothing	0	0								Center	No
1932	7	613	2015-11-19	2011-12-03	3800	m	1971	Employed	High	1972	Employed	High	y	y	0	0	0		17.700	17.7	106.5	1.065	23	00	0	8	0	n	parents' bed	parents' bed	20	20	0	0	milk	nothing	nothing	nothing	0	0								Center	Yes
1933	10	603	2015-11-19	2010-09-28	3590	m	1979	Unemployed	High	1978	Employed	High	y	y	0	0	0		20.000	20	111.0	1.11	22	00	0	8	0	y	parents' bed	parents' bed	19	19	15	15	nothing	nothing	nothing	nothing	1	0								Center	Yes
1934	10	603	2015-11-19	2010-06-17	2700	f	1972	Employed	High	1970	Employed	High	y	y	0	0	0		23.000	23	118.0	1.18	0	15	15	7	30	y	own bed	own bed	20	20	0	0	nothing		nothing	nothing	1	0								Center	No
1935	13	530	2015-11-19	2005-08-11	3360	f	1969	Works at home	High	1965	Employed	High	y	y	2	0	0		35.000	35	139.0	1.39	21	15	15	7	0	y	own bed	own bed	19	19	30	30	nothing	nothing	nothing	nothing	0	0								South	No
1936	7	585	2015-11-19	2012-05-06	2850	m	1980	Employed	High	1971	Employed	Middle	y	y	0	0	1		15.580	15.58	104.0	1.04	21	30	30	8	15	n	parents' bed	parents' bed	19	19	15	15	juice	nothing	nothing	nothing	2	0								Center	Yes
1938	7	585	2015-11-19	2005-05-22	2020	f	1971	Employed	High	1964	Employed	Middle	y	n	1	1	0		37.400	37.4	144.5	1.445	21	30	30	7	0	c	own bed	own bed	20	20	0	0	nothing	nothing	nothing	nothing	0	0								Center	No
1939	13	530	2015-11-19	2006-11-13	2450	m	1979	Works at home	High	1968	Employed	Elementary	y	y	1	0	0		30.000	30	133.5	1.335	21	45	45	7	0	c	own bed	own bed	20	20	0	0	nothing	nothing	nothing	nothing	0	0								South	Yes
1940	13	530	2015-11-19	2003-04-27	2800	m	1969	Unemployed	High	1968	Employed	Middle	y	y	1	0	0		61.000	61	142.5	1.425	23	30	30	7	45	y	own bed	own bed	21	21	15	15	nothing	nothing	nothing	nothing	0	0								South	Yes
1941	17	534	2015-11-19	2008-09-05	3800	m	1984	Employed	High	1976	Employed	High	y	y	0	1	0		26.000	26	130.5	1.305	21	00	0	6	45	c	own bed	own bed	19	19	0	0	nothing	sweet	nothing	nothing	0	0								North	Yes
1942	17	534	2015-11-19	2005-11-13	3260	m	1973	Employed	Middle	1975	Employed	Middle	y	y	0	2	0		46.500	46.5	139.0	1.39	20	45	45	5	45	c	own bed	own bed	18	18	30	30	nothing	nothing	nothing	nothing	0	0								North	Yes
1943	9	553	2015-11-20	2010-08-04	3840	m	1979	Works at home	High	1980	Employed	High	y	y	0	1	0		28.000	28	112.8	1.128	22	00	0	7	45	y	other room	own bed	19	19	45	45	juice	nothing	nothing	nothing	0	0								North	Yes
1944	9	553	2015-11-20	2011-09-08	3240	m	1981	Unemployed	High	1974	Employed	High	y	y	0	1	0		16.900	16.9	105.0	1.05	22	30	30	8	30	y	own bed	own bed	19	19	30	30	nothing	nothing	nothing	nothing	0	0								North	Yes
1945	9	532	2015-11-20	2008-04-29	3860	m	1971	Employed	University	1971	Employed	High	y	y	0	1	0		22.800	22.8	125.0	1.25	21	15	15	7	0	y	own bed	own bed	19	19	30	30	nothing	nothing	nothing	nothing	0	0								North	Yes
1946	4	523	2015-11-20	2012-07-04	3000	m	1986	Works at home	High	1984	Employed	High	y	y	0	0	0		16.000	16	102.0	1.02	22	30	30	9	15	y	own bed	parents' bed	19	19	30	30	nothing	nothing	nothing	nothing	3	0								South	Yes
1948	4	523	2015-11-20	2007-06-08	2740	m	1976	Works at home	Middle	1974	Employed	Middle	y	y	2	0	2		27.500	27.5	130.0	1.3	20	30	30	7	15	n	own bed	own bed	19	19	0	0	nothing	nothing	nothing	nothing	1	0								South	Yes
1949	4	523	2015-11-20	2012-11-12	2620	f	1984	Employed	University	1982	Employed	University	y	n	0	0	0		12.500	12.5	98.0	0.98	23	00	0	8	15	y	parents' bed	parents' bed	18	18	45	45	milk	nothing	nothing	nothing	2	0								South	No
1950	4	523	2015-11-20	2008-11-16	3000	f	1978	Employed	University	1975	Employed	University	y	y	0	2	0		28.000	28	126.0	1.26	21	00	0	7	30	y	own bed	own bed	19	19	30	30	nothing	sweet	nothing	nothing	0	0								South	No
1951	10	609	2015-11-20	2014-11-03	2200	m	1982	Employed	High	1983	Employed	High	y	y	0	0	0		11.380	11.38	87.0		22	00	0	6	30	n	parents' bed	parents' bed	20	20	15	15	nothing		milk	nothing	2	2								Center	Yes
1953	7	585	2015-11-20	2014-09-11	2900	f	1970	Employed	University	1970	Employed	High	y	y	0	0	0		10.200	10.2	78.0		21	00	0	7	0	y	parents' bed	parents' bed	19	19	0	0	nothing	nothing	milk	nothing	3	1								Center	No
1955	7	613	2015-11-20	2008-12-13	3500	m	1970	Employed	High	1968	Employed	High	y	y	0	0	0		31.500	31.5	125.5	1.255	23	30	30	7	15	n	parents' bed	parents' bed	20	20	0	0	nothing	nothing	nothing	nothing	0	1.5								Center	Yes
1956	7	613	2015-11-20	2008-12-21	3570	f	1983	Employed	University	1983	Employed	University	y	y	0	1	0		27.500	27.5	127.0	1.27	22	30	30	7	15	y	other room	own bed	20	20	15	15	nothing	nothing	nothing	nothing	2	0								Center	No
1957	7	613	2015-11-20	2005-11-22	3100	m	1972	Works at home	High	1973	Employed	High	y	y	0	0	0		51.000	51	143.0	1.43	21	45	45	7	45	y	other room	parents' bed	20	20	15	15	nothing	nothing	nothing	nothing	0	0								Center	Yes
1958	9	532	2015-11-20	2003-11-11	3120	m	1977	Employed	High	1974	Employed	Middle	y	y	0	1	0		46.000	46	159.5	1.595	22	30	30	7	0	c	own bed	own bed	20	20	15	15	nothing	nothing	nothing	nothing	0	0								North	Yes
1959	9	532	2015-11-20	2007-10-03	3260	f	1977	Employed	High	1974	Employed	Middle	y	y	1	0	0		29.900	29.9	134.0	1.34	22	00	0	7	15	c	own bed	own bed	20	20	15	15	nothing	nothing	nothing	nothing	0	0								North	No
1960	7	585	2015-11-20	2012-11-15	4370	f	1988	Employed	High	1990	Employed	Middle	y	y	0	0	0		17.700	17.7	100.0	1	22	00	0	8	0	y	other room	own bed	19	19	30	30	nothing	nothing	nothing	nothing	1	1.5								Center	No
1961	7	613	2015-11-20	2008-04-23	3570	m	1968	Works at home	High	1957	Employed	University	y	y	1	0	0		26.000	26	133.0	1.33	21	45	45	7	0	y	own bed	own bed	20	20	45	45	nothing	nothing	nothing	nothing	1	0								Center	Yes
1962	7	613	2015-11-20	2006-05-17	3220	f	1979	Works at home	Middle	1973	Employed	High	y	y	0	0	0		21.700	21.7	124.5	1.245	22	15	15	7	0	y	parents' bed	own bed	19	19	45	45	juice	sweet	nothing	nothing	0	0								Center	No
1964	7	585	2015-11-20	2012-06-01	2994	f	1979	Employed	University	1976	Employed	High	y	y	0	0	0		17.400	17.4	102.0	1.02	23	00	0	7	0	y	own bed	own bed	20	20	0	0	juice	nothing	nothing	nothing	0	0								Center	No
1965	17	534	2015-11-20	2011-01-03	2950	f	1980	Employed	High	1986	Unemployed	Middle	y	n	2	2	1		17.000	17	109.0	1.09	21	30	30	8	30	c	own bed	own bed	19	19	30	30	other	sweet	milk	sweet	1	0								North	No
1966	17	534	2015-11-20	2006-10-18	2100	f	1969	Employed	University	1966	Employed	University	y	y	1	1	0		27.000	27	125.0	1.25	22	00	0	7	0	y	own bed	own bed	19	19	0	0	nothing	nothing	nothing	nothing	0	0								North	No
1967	7	613	2015-11-20	2008-08-02	3430	f	1974	Works at home	Middle	1966	Employed	Middle	y	y	1	0	1		28.500	28.5	129.5	1.295	23	45	45	7	30	y	parents' bed	parents' bed	19	19	30	30	other	nothing	nothing	nothing	0	0								Center	No
1968	13	606	2015-11-20	2007-06-16	3100	m	1981	Employed	High	1975	Employed	Middle	y	y	0	1	0		40.000	40	138.0	1.38	22	30	30	7	0	y	own bed	own bed	21	21	0	0	nothing	nothing	nothing	nothing	1	0								South	Yes
1969	13	606	2015-11-20	2010-11-15	2880	f	1976	Unemployed	Middle	1978	Employed	High	y	y	0	0	0		17.500	17.5	113.0	1.13	24	00	0	9	0	y	parents' bed	parents' bed	20	20	30	30	nothing	nothing	nothing	nothing	0	0								South	No
1970	13	606	2015-11-20	2003-09-30	2800	m	1976	Employed	University	1973	Employed	High	y	y	0	0	0		53.000	53	157.0	1.57	24	00	0	7	0	y	own bed	own bed	20	20	0	0	nothing	sweet	nothing	nothing	0	0								South	Yes
1971	13	606	2015-11-20	2010-06-04	3000	m	1976	Employed	High	1973	Employed	High	y	y	1	0	0		16.000	16	111.0	1.11	23	30	30	7	30	c	own bed	own bed	20	20	30	30	nothing	nothing	nothing	nothing	0	0								South	Yes
1972	13	606	2015-11-20	2008-04-03	3150	m	1976	Employed	High	1973	Employed	High	y	y	0	1	0		26.000	26	130.0	1.3	23	30	30	7	30	c	own bed	own bed	20	20	30	30	nothing	nothing	nothing	nothing	0	0								South	Yes
1973	9	553	2015-11-24	2013-02-12	3090	f	1976	Works at home	High	1975	Employed	Middle	y	y	1	0	0		15.400	15.4	91.9	0.919	20	45	45	7	30	y	own bed	own bed	19	19	0	0	nothing	nothing	nothing	nothing	0	0								North	No
1975	9	553	2015-11-24	2010-11-05	3190	m	1976	Employed	University	1976	Employed	High	y	y	0	1	0		19.200	19.2	109.8	1.098	21	45	45	7	30	y	own bed	own bed	19	19	15	15	milk	nothing	nothing	nothing	0	0								North	Yes
1976	4	491	2015-11-24	2011-08-05	3650	f	1982	Employed	High	1982	Employed	High	y	y	0	0	0		17.000	17	105.5	1.055	22	00	0	6	45	y	own bed	own bed	20	20	0	0	milk	nothing	milk	nothing	2	1.5								South	No
1977	7	613	2015-11-24	2013-01-21	3400	m	1984	Employed	High	1981	Employed	High	y	y	0	1	0		13.900	13.9	92.7	0.927	22	00	0	7	0	y	other room	own bed	20	20	15	15	nothing	nothing	nothing	nothing	1	1.5								Center	Yes
1978	7	613	2015-11-24	2009-09-19	2920	m	1983	Employed	High	1979	Employed	Middle	y	n	1	1	1		23.500	23.5	122.0	1.22	22	00	0	7	30	c	own bed	own bed	19	19	30	30	nothing	salted	nothing	nothing	2	0								Center	Yes
1979	7	613	2015-11-24	2014-09-09	3610	m	1988	Works at home	High	1980	Employed	High	y	y	1	0	0		10.750	10.75	80.0		22	00	0	7	0	n	parents' bed	own bed	19	19	45	45	milk	nothing	milk	nothing	4	1.5								Center	Yes
1980	9	553	2015-11-24	2011-11-04	3500	f	1987	Unemployed	High	1977	Employed	High	y	y	0	0	0		17.100	17.1	104.0	1.04	21	30	30	8	30	y	parents' bed	parents' bed	19	19	30	30	nothing	nothing	nothing	nothing	0	0								North	No
1981	10	505	2015-11-24	2011-03-11	3660	m	1981	Employed	Middle	1974	Employed	Elementary	y	y	1	0	0		20.600	20.6	108.5	1.085	21	00	0	6	30	c	own bed	own bed	19	19	30	30	nothing	nothing	nothing	nothing	0	0								Center	Yes
1982	7	613	2015-11-24	2013-11-30	3130	f	1980	Employed	University	1974	Employed	High	y	y	0	0	0		9.900	9.9	88.0		22	30	30	6	0	y	other room	own bed	19	19	30	30	milk	nothing	nothing	nothing	0	2								Center	No
1983	10	609	2015-11-24	2004-04-14	3520	f	1982	Works at home	Middle	1979	Employed	Elementary	y	y	0	3	0		43.500	43.5	154.0	1.54	0	30	30	10	30	y	own bed	own bed	20	20	15	15	nothing	fruit	nothing	nothing	2	1.25								Center	No
1984	13	530	2015-11-24	2012-01-23	3300	f	1974	Employed	High	1975	Employed	High	y	y	0	0	0		15.000	15	100.5	1.005	23	00	0	9	0	y	parents' bed	parents' bed	20	20	15	15	milk	salted	nothing	nothing	0	0								South	No
1985	10	609	2015-11-24	2004-10-02	3500	m	1971	Employed	High	1967	Employed	High	y	y	1	0	0		31.200	31.2	135.0	1.35	23	00	0	6	45	y	own bed	own bed	20	20	0	0	nothing	nothing	nothing	nothing	0	0								Center	Yes
1986	15	615	2015-11-24	2010-07-03	3220	m	1976	Employed	High	1975	Employed	High	y	y	2	0	0		16.000	16	111.0	1.11	21	45	45	7	45	y	own bed	own bed	20	20	30	30	nothing	nothing	nothing	nothing	0	1								South	Yes
1987	15	615	2015-11-24	2010-11-22	3260	m	1986	Employed	High	1980	Employed	High	y	y	0	0	0		16.300	16.3	106.0	1.06	20	45	45	6	45	n	own bed	own bed	19	19	45	45	nothing	nothing	nothing	nothing	0	0								South	Yes
1988	15	615	2015-11-03	2010-03-14	3320	m	1969	Works at home	Middle	1964	Employed	Middle	y	y	0	0	0		15.000	15	110.0	1.1	21	30	30	7	45	y	own bed	own bed	20	20	30	30	nothing	nothing	nothing	nothing	0	0								South	Yes
1989	15	615	2015-11-03	2012-02-29	4800	m	1987	Employed	High	1987	Employed	High	y	y	0	1	0		16.500	16.5	100.0	1	22	00	0	7	30	y	parents' bed	parents' bed	20	20	15	15	nothing	nothing	nothing	nothing	2	1								South	Yes
1990	13	530	2015-11-24	2007-12-22	2940	m	1972	Works at home	Middle	1966	Employed	Middle	y	y	2	0	1		29.000	29	137.5	1.375	22	30	30	7	30	c	own bed	own bed	21	21	0	0	nothing	nothing	nothing	nothing	0	0								South	Yes
1991	10	609	2015-11-24	2013-03-19	3740	m	1974	Employed	High	1969	Employed	University	y	y	3	0	0		12.000	12	88.0	0.88	22	30	30	7	0	y	other room	own bed	20	20	0	0	milk	nothing	nothing	nothing	0	2								Center	Yes
1992	15	615	2015-10-29	2006-02-06	3200	m	1977	Employed	High	1974	Employed	High	y	y	1	0	0		32.000	32	133.0	1.33	23	00	0	7	30	y	parents' bed	parents' bed	21	21	0	0	nothing	nothing	nothing	nothing	0	0								South	Yes
1993	15	615	2015-10-29	2012-11-14	1580	f	1982	Unemployed	University	1980	Employed	High	y	y	0	0	0		14.000	14	95.0	0.95	20	30	30	8	0	y	own bed	own bed	19	19	45	45	nothing	nothing	nothing	nothing	1	2								South	No
1994	15	615	2015-11-06	2006-08-10	2950	f	1975	Employed	High	1976	Employed	Middle	y	y	1	1	0		28.000	28	130.0	1.3	22	00	0	7	30	y	own bed	own bed	21	21	0	0	nothing	nothing	nothing	nothing	0	0								South	No
1995	4	523	2015-11-24	2009-09-15	2850	m	1980	Works at home	Middle	1974	Employed	Middle	y	y	0	0	2		18.500	18.5	113.0	1.13	23	15	15	8	15	y	parents' bed	parents' bed	20	20	15	15	milk	sweet	nothing	nothing	1	0								South	Yes
1996	15	615	2015-10-27	2012-09-24	2840	f	1975	Employed	High	1976	Employed	Middle	y	y	2	0	0		12.600	12.6	92.0	0.92	22	00	0	7	45	n	parents' bed	parents' bed	21	21	0	0	nothing	nothing	nothing	nothing	2	0.5								South	No
1997	15	615	2015-10-28	2005-12-22	3235	m	1975	Employed	High	1975	Employed	High	y	y	0	2	0		42.000	42	140.0	1.4	21	30	30	7	15	y	own bed	own bed	20	20	30	30	nothing	nothing	nothing	nothing	0	0								South	Yes
1998	10	505	2015-11-24	2008-11-15	3230	m	1983	Employed	High	1980	Employed	Middle	y	y	0	1	0		23.400	23.4	125.0	1.25	21	15	15	7	15	y	own bed	own bed	19	19	30	30	nothing	nothing	nothing	nothing	0	0								Center	Yes
1999	15	615	2015-10-20	2007-04-06	3500	f	1980	Employed	Middle	1978	Unemployed	High	y	y	1	0	0		37.000	37	130.0	1.3	22	15	15	7	30	y	own bed	own bed	20	20	30	30	nothing	nothing	nothing	nothing	0	0								South	No
2000	15	615	2015-10-20	2009-11-21	2750	m	1985	Employed	University	1975	Employed	High	y	y	0	1	0		19.000	19	107.0	1.07	23	00	0	7	45	y	own bed	own bed	21	21	30	30	milk	nothing	nothing	nothing	0	0								South	Yes
2001	15	615	2015-10-28	2006-10-16	3120	f	1978	Works at home	Middle	1975	Employed	High	y	y	1	0	0		30.000	30	131.0	1.31	23	00	0	7	15	y	own bed	own bed	21	21	30	30	nothing	nothing	nothing	nothing	0	0								South	No
2002	13	530	2015-11-24	2010-03-12	1820	f	1978	Employed	High	1976	Employed	Middle	y	y	1	0	0		17.000	17	107.0	1.07	19	00	0	7	30	y	other room	own bed					nothing	nothing	nothing	nothing	0	2								South	No
2003	10	603	2015-11-24	2004-06-22	3050	m	1968	Employed	University	1961	Employed	High	y	y	0	0	0		57.000	57	151.0	1.51	23	00	0	7	30	y	own bed	own bed	20	20	0	0	nothing	nothing	nothing	nothing	0	0								Center	Yes
2004	13	530	2015-11-24	2006-09-03	3300	f	1981	Employed	High	1965	Unemployed	Middle	y	n	0	0	1		29.000	29	131.0	1.31	22	00	0	7	30	y	parents' bed	parents' bed	20	20	0	0	nothing	sweet	nothing	nothing	0	0								South	No
2005	13	530	2015-11-24	2010-06-22	4250	f	1983	Employed	High	1981	Employed	High	y	y	1	0	0		35.000	35	117.0	1.17	21	30	30	7	15	c	own bed	own bed	20	20	0	0	milk	nothing	nothing	nothing	0	0								South	No
2006	13	530	2015-11-24	2008-11-29	3800	f	1983	Employed	University	1981	Employed	University	y	y	0	1	0		29.000	29	121.0	1.21	22	00	0	7	15	c	own bed	own bed	20	20	30	30	milk	nothing	nothing	nothing	0	0								South	No
2007	10	603	2015-11-24	2006-12-05	3790	m	1976	Employed	University	1976	Employed	University	y	y	0	1	0		43.000	43	142.0	1.42	22	15	15	7	30	c	own bed	own bed	20	20	0	0	nothing	nothing	nothing	nothing	0	0								Center	Yes
2008	13	530	2015-11-24	2005-12-21	2490	m	1976	Employed	University	1971	Employed	High	y	y	1	1	0		29.000	29	144.0	1.44	22	00	0	7	30	y	own bed	own bed	19	19	0	0	nothing	nothing	nothing	nothing	0	0								South	Yes
2009	17	534	2015-11-24	2008-04-16	3230	m	1977	Works at home	High	1974	Employed	High	y	y	1	0	0		24.500	24.5	134.0	1.34	21	45	45	6	45	y	own bed	own bed	19	19	30	30	nothing	nothing	nothing	nothing	0	0								North	Yes
2010	13	530	2015-11-24	2014-07-20	4040	m	1983	Works at home	High	1977	Employed	High	y	y	0	0	0		11.500	11.5	83.0		23	30	30	8	45	n	parents' bed	parents' bed	20	20	30	30	nothing	nothing	nothing	nothing	3	2								South	Yes
2011	4	523	2015-11-24	2009-04-02	2600	f	1981	Unemployed	Middle	1978	Unemployed	Elementary	y	y	1	0	0		20.000	20	115.0	1.15	21	00	0	7	0	n	own bed	own bed	19	19	30	30	nothing	nothing	nothing	nothing	0	0								South	No
2012	17	534	2015-11-24	2003-05-29	3080	m	1965	Works at home	Middle	1964	Employed	High	y	y	2	0	0		52.500	52.5	156.0	1.56	22	45	45	7	0	c	own bed	own bed	19	19	0	0	nothing	fruit	nothing	nothing	0	0								North	Yes
2013	13	530	2015-11-24	2013-11-19	3060	m	1984	Employed	High	1979	Employed	High	y	y	0	1	0		14.000	14	86.5	0.865	21	00	0	8	0	y	other room	own bed	19	19	45	45	milk	nothing	milk	nothing	2	1								South	Yes
2014	10	603	2015-11-25	2002-04-04	4100	m	1966	Employed	University	1966	Employed	High	y	y	0	1	0		65.000	65	162.0	1.62	22	30	30	7	15	c	own bed	own bed	20	20	0	0	nothing	nothing	nothing	nothing	0	0								Center	Yes
2016	10	603	2015-11-25	2013-01-09	2680	m	1984	Employed	High	1980	Employed	High	y	y	0	0	0		15.500	15.5	98.0	0.98	23	45	45	8	30	y	parents' bed	own bed	20	20	0	0	juice	fruit	nothing	nothing	0	2								Center	Yes
2019	4	502	2015-11-25	2010-05-06	3000	m	1967	Works at home	High	1965	Employed	High	y	y	2	0	0		24.000	24	114.0	1.14	21	30	30	8	0	y	own bed	own bed	20	20	0	0		fruit	milk		0	0.5								South	Yes
2020	7	613	2015-11-25	2005-12-15	2570	f	1970	Employed	High	1965	Employed	High	y	y	1	0	0		40.000	40	148.0	1.48	22	30	30	6	15	y	parents' bed	own bed	20	20	0	0	nothing	nothing	nothing	nothing	0	0								Center	No
2021	7	613	2015-11-25	2008-09-04	3070	f	1982	Works at home	High	1953	Employed	Middle	y	y	0	1	0		42.300	42.3	128.5	1.285	21	00	0	8	0	y	own bed	own bed	20	20	0	0	nothing	nothing	nothing	nothing	0	0								Center	No
2022	15	610	2015-11-25	2011-11-19	3150	f	1977	Employed	University	1977	Employed	High	y	y	1	0	0		17.000	17	102.0	1.02	22	00	0	7	30	y	parents' bed	own bed	20	20	0	0	nothing	nothing	nothing	nothing	0	0								South	No
2023	4	523	2015-11-25	2010-12-21	2750	m	1982	Works at home	Middle	1974	Employed	High	y	y	0	1	2		14.000	14	106.0	1.06	21	30	30	7	45	y	own bed	own bed	18	18	30	30	milk	sweet	nothing	nothing	0	0								South	Yes
2024	15	610	2015-11-25	2005-04-05	2620	m	1964	Employed	High	1961	Unemployed	High	y	y	0	0	0		36.000	36	144.0	1.44	22	30	30	7	30	y	own bed	own bed	20	20	30	30	nothing	nothing	nothing	nothing	0	0								South	Yes
2025	7	613	2015-11-25	2004-08-16	3150	f	1979	Employed	High	1975	Employed	Middle	y	n	0	1	1		65.400	65.4	156.0	1.56	23	30	30	12	0	y	own bed	own bed	20	20	30	30	nothing	nothing	nothing	nothing	3	1.5								Center	No
2026	4	491	2015-11-25	2010-02-13	3280	f	1965	Employed	High	1967	Employed	University	y	y	0	0	0		19.000	19	115.0	1.15	22	00	0	7	30	y	parents' bed	parents' bed	20	20	0	0	nothing	sweet	nothing	nothing	0	0								South	No
2027	7	613	2015-11-25	2011-04-19	3200	m	1970	Works at home	University	1966	Employed	University	y	y	0	0	0		14.500	14.5	104.5	1.045	22	30	30	8	15	n	parents' bed	parents' bed	20	20	15	15	nothing	fruit	nothing	nothing	0	0								Center	Yes
2028	7	613	2015-11-25	2010-01-17	3640	m	1976	Employed	Middle	1980	Employed	High	y	y	0	0	0		25.500	25.5	125.0	1.25	22	00	0	7	15	y	own bed	own bed	19	19	30	30	nothing	nothing	nothing	nothing	0	0								Center	Yes
2029	4	491	2015-11-25	2014-07-20	2750	f	1990	Employed	High	1985	Employed	High	y	y	0	0	0		8.950	8.95	79.0		21	30	30	8	45	n	parents' bed	own bed	19	19	0	0	nothing	sweet	nothing		2	2								South	No
2030	7	613	2015-11-25	2003-12-14	2870	f	1968	Works at home	High	1968	Employed	Middle	y	y	1	0	0		50.500	50.5	159.0	1.59	22	30	30	7	15	y	own bed	own bed	20	20	30	30	nothing	nothing	nothing	nothing	0	0								Center	No
2031	17	534	2015-11-25	2013-02-21	3270	f	1980	Works at home	Middle	1975	Employed	Middle	y	y	2	0	1		13.700	13.7	93.0	0.93	24	00	0	8	15	n	parents' bed	own bed	20	20	30	30	milk	fruit	milk	nothing	2	2								North	No
2032	7	613	2015-11-25	2014-06-02	2980	f	1982	Unemployed	Middle	1970	Employed	High	y	y	1	0	0		9.850	9.85	80.0		24	00	0	7	30	n	other room	parents' bed	19	19	30	30	milk	nothing	nothing	nothing	0	2								Center	No
2033	4	608	2015-11-19	2007-05-20	2700	m	1987	Works at home	Elementary	1970	Unemployed	Middle	y	y	0	2	0		34.800	34.8	126.0	1.26	22	30	30	7	0	y	own bed	own bed	19	19	45	45	nothing	sweet	nothing	nothing	0	0								South	Yes
2034	4	608	2015-11-25	2010-04-01	3500	m	1980	Employed	High	1978	Employed	High	y	y	1	0	0		25.100	25.1	118.7	1.187	21	00	0	7	0	c	parents' bed	parents' bed	19	19	30	30	nothing	nothing	nothing	nothing	0	0								South	Yes
2035	4	608	2015-11-25	2008-10-09	3400	f	1977	Works at home	High	1975	Employed	University	y	y	1	0	0		24.800	24.8	131.0	1.31	21	15	15	7	0	c	own bed	own bed	19	19	30	30	nothing	nothing	nothing	nothing	0	0								South	No
2036	4	608	2015-11-25	2007-09-04	3050	f	1983	Employed	High	1982	Employed	High	y	n	0	0	2		29.400	29.4	126.9	1.269	21	30	30	7	30	n	own bed	own bed	19	19	30	30	nothing	sweet	nothing	nothing	0	0								South	No
2037	4	608	2015-11-25	2010-03-16	3450	m	1980	Employed	High	1981	Employed	Middle	y	y	0	0	0		23.400	23.4	117.9	1.179	20	45	45	7	30	n	other room	parents' bed	19	19	30	30	nothing	nothing	nothing	nothing	2	0								South	Yes
2038	4	608	2015-11-25	2003-09-28	3050	m	1972	Employed	University	1970	Employed	University	y	y	0	0	0		43.000	43	145.0	1.45	22	30	30	7	0	y	own bed	own bed	20	20	0	0	nothing	nothing	nothing	nothing	0	0								South	Yes
2039	10	609	2015-11-26	2011-12-28	3880	m	1981	Works at home	High	1977	Employed	High	y	y	1	0	0		18.000	18	108.0	1.08	22	30	30	7	30	y	own bed	own bed	20	20	0	0	nothing	fruit	nothing	nothing	0	2								Center	Yes
2040	7	613	2015-11-26	2013-06-03	3250	m	1972	Works at home	Middle	1967	Employed	Middle	y	y	2	0	0		15.000	15	96.0	0.96	22	00	0	6	30	n	parents' bed	own bed	19	19	30	30	nothing	nothing	nothing	nothing	1	3								Center	Yes
2041	4	491	2015-11-26	2009-12-02	3450	f	1978	Works at home	Middle	1975	Unemployed	Elementary	y	y	0	2	0		31.000	31	124.0	1.24	22	00	0	7	30	y	own bed	own bed	19	19	15	15	nothing	sweet	nothing	nothing	0	0								South	No
2043	7	613	2015-11-26	2013-02-10	3380	m	1978	Works at home	High	1972	Employed	High	y	y	1	0	0		14.000	14	98.5	0.985	22	00	0	7	15	c	other room	own bed	19	19	30	30	milk	nothing	nothing	nothing	1	2								Center	Yes
2044	7	613	2015-11-26	2013-07-24	2620	f	1973	Works at home	High	1972	Employed	High	y	y	1	0	0		11.600	11.6	87.0	0.87	23	00	0	7	30	c	other room	own bed	19	19	30	30	milk	nothing	nothing	nothing	0	1.5	y							Center	No
2045	4	491	2015-11-26	2012-09-22	3250	f	1990	Works at home	High	1987	Unemployed	High	y	y	0	1	0		12.500	12.5	85.5	0.855	22	30	30	7	45	y	parents' bed	own bed	18	18	30	30	nothing	fruit	milk	nothing	2	1								South	No
2046	7	613	2015-11-26	2013-02-07	1520	f	1962	Works at home	High	1964	Employed	University	y	y	1	0	0		11.000	11	89.0	0.89	23	00	0	9	30	n	parents' bed	own bed	20	20	30	30	nothing	nothing	nothing	nothing	1	2								Center	No
2047	7	585	2015-11-26	2010-01-20	3200	m	1978	Works at home	High	1974	Employed	University	y	y	1	0	0		19.400	19.4	120.0	1.2	23	00	0	7	30	c	parents' bed	own bed	19	19	30	30	nothing	nothing	nothing	nothing	0	1								Center	Yes
2048	4	502	2015-11-18	2008-01-02	3120	f	1965	Employed	University	1964	Employed	University	y	y	1	0	0		31.000	31	132.0	1.32	22	15	15	7	15	y	own bed	own bed	19	19	15	15	milk & juice	nothing	nothing	nothing	0	0								South	No
2051	10	603	2015-11-26	2003-02-08	3100	m	1968	Works at home	University	1961	Unemployed	University	y	y	0	1	0		46.000	46	151.0	1.51	22	30	30	7	15	c	own bed	own bed	20	20			nothing	nothing	nothing	nothing	1	0								Center	Yes
2052	4	502	2015-11-26	2008-04-11	3280	f	1973	Employed	High	1971	Employed	Middle	y	y	2	0	0		39.300	39.3	127.0	1.27	23	00	0	6	45	y	own bed	own bed	20	20	0	0	milk	nothing	nothing	nothing	0	0								South	No
2053	7	585	2015-11-26	2008-10-27	2860	f	1981	Employed	High	1974	Employed	High	y	y	1	0	0		19.750	19.75	114.0	1.14	22	15	15	7	0	y	own bed	own bed	19	19	0	0	nothing	nothing	nothing	nothing	0	0								Center	No
2054	9	511	2015-11-26	2005-04-01	3900	f	1975	Employed	High	1974	Employed	High	y	y	1	0	0		38.500	38.5	148.0	1.48	22	15	15	7	30	y	other room	own bed	21	21	0	0	nothing	nothing	nothing	nothing	0	0								North	No
2055	15	610	2015-11-26	2012-11-05	3200	f	1986	Works at home	Middle	1968	Employed	Middle	y	y	3	0	0		12.000	12	95.0	0.95	20	30	30	6	30	n	parents' bed	parents' bed	19	19	0	0	nothing	sweet	nothing	nothing	1	0								South	No
2056	15	610	2015-11-26	2004-05-13	2920	m	1976	Employed	Middle	1976	Employed	Middle	y	y	0	0	0		25.500	25.5	138.5	1.385	0	15	15	11	30	y	own bed	own bed	21	21	30	30	nothing	nothing	nothing	nothing	0	0								South	Yes
2057	7	585	2015-11-26	2011-03-22	3120	m	1973	Employed	University	1974	Employed	University	y	y	0	0	0		17.900	17.9	110.0	1.1	21	45	45	8	15	n	parents' bed	parents' bed	19	19	45	45	milk	nothing	nothing	nothing	0	0								Center	Yes
2058	4	502	2015-11-26	2013-06-13	2860	m	1975	Works at home	Middle	1971	Employed	Middle	y	y	1	0	1		12.600	12.6	84.0	0.84	23	00	0	8	0	y	own bed	own bed	19	19	0	0	juice	sweet	milk	nothing	2	1.5								South	Yes
2059	4	502	2015-11-26	2007-10-05	2780	m	1974	Works at home	Middle	1970	Employed	High	y	y	0	1	0		30.000	30	133.0	1.33	21	45	45	7	30	y	other room	other room	20	20	0	0	nothing	nothing	nothing	nothing	0	0								South	Yes
2060	4	502	2015-11-26	2012-02-02	2970	f	1975	Employed	High	1969	Employed	High	y	y	1	1	0		13.400	13.4	93.0	0.93	23	00	0	7	0	y	own bed	own bed	18	18	15	15	juice	nothing	nothing	nothing	2	1.5								South	No
2061	13	530	2015-11-26	2014-10-16	3490	m	1983	Employed	University	1980	Employed	University	y	y	0	0	0		11.100	11.1	75.0		22	30	30	6	45	n	own bed	own bed	20	20	15	15	nothing	nothing	nothing	nothing	0	1								South	Yes
2062	13	530	2015-11-26	2007-11-25	2600	m	1976	Works at home	High	1973	Employed	High	y	y	0	0	1		27.000	27	126.0	1.26	22	15	15	6	30	y	parents' bed	parents' bed	19	19	30	30	nothing	nothing	nothing	salted	0	0								South	Yes
2065	4	523	2015-11-27	2014-08-25	2530	f	1970	Works at home	Middle	1968	Employed	Middle	y	y	2	0	0		9.400	9.4	79.0		23	00	0	6	15	n	parents' bed	parents' bed	20	20	0	0	milk	sweet	nothing	nothing	5	1								South	No
2066	13	530	2015-11-27	2013-11-07	3300	f	1983	Works at home	Middle	1980	Unemployed	Middle	y	y	1	0	0		10.500	10.5	82.0	0.82	22	30	30	8	0	c	parents' bed	own bed	20	20	30	30	nothing	nothing	nothing	nothing	0	2								South	No
2067	10	505	2015-11-27	2012-09-22	2830	m	1970	Employed	High	1968	Employed	High	y	y	2	0	0		13.500	13.5	96.3	0.963	21	30	30	6	45	y	own bed	own bed	20	20	0	0	juice	nothing	nothing	nothing	0	2								Center	Yes
2068	10	603	2015-11-27	2011-07-16	2170	f	1975	Works at home	High	1969	Employed	High	y	y	0	0	0		16.000	16	106.0	1.06	21	30	30	8	30	y	own bed	parents' bed	19	19	0	0	nothing	nothing	nothing	nothing	1	0								Center	No
2069	10	505	2015-11-27	2009-04-11	3520	m	1978	Employed	High	1973	Employed	High	y	y	1	0	0		21.500	21.5	119.0	1.19	21	30	30	7	15	y	parents' bed	own bed	20	20	0	0	nothing	nothing	nothing	nothing	0	0								Center	Yes
2070	7	613	2015-11-27	2012-05-03	3380	m	1981	Works at home	High	1977	Employed	High	y	y	1	0	0		13.500	13.5	95.0	0.95	1	30	30	5	0	c	own bed	own bed	20	20	0	0	nothing	nothing	nothing	nothing	1	0								Center	Yes
2071	7	613	2015-11-27	2010-01-14	2720	m	1974	Employed	University	1973	Employed	High	y	y	0	0	0		16.600	16.6	109.0	1.09	23	00	0	7	30	y	parents' bed	own bed	20	20	30	30	nothing	nothing	nothing	nothing	0	0								Center	Yes
2072	7	585	2015-11-27	2008-06-26	3540	m	1974	Employed	University	1973	Employed	University	y	y	0	0	0		30.300	30.3	131.5	1.315	22	30	30	7	0	y	own bed	own bed	19	19	30	30	nothing	nothing	nothing	fruit	0	0								Center	Yes
2073	7	585	2015-11-27	2011-03-25	3960	f	1983	Works at home	High	1984	Employed	High	y	y	0	1	0		17.900	17.9	109.0	1.09	23	00	0	7	30	y	own bed	own bed	19	19	0	0	nothing	sweet	nothing	nothing	0	2								Center	No
2074	17	534	2015-11-26	2007-02-21	1950	f	1976	Works at home	Middle	1977	Employed	Middle	y	y	0	2	0		47.800	47.8	132.0	1.32	21	30	30	6	45	c	own bed	own bed	19	19	0	0	nothing	sweet	nothing	nothing	1	0								North	No
2075	17	534	2015-11-27	2003-04-07	3070	m	1979	Unemployed	Middle	1970	Employed	Middle	y	y	0	1	0		63.000	63	164.0	1.64	21	30	30	7	15	c	own bed	own bed	19	19	30	30	nothing	nothing	nothing	nothing	0	0								North	Yes
2076	17	534	2015-11-27	2008-10-21	3250	m	1975	Employed	University	1967	Employed	High	y	y	0	1	0		20.000	20	122.0	1.22	21	00	0	7	0	c	own bed	own bed	19	19	0	0	nothing	nothing	nothing	nothing	0	0								North	Yes
2079	13	606	2015-11-26	2006-09-08	3360	m	1974	Works at home	University	1974	Employed	High	y	y	0	1	0		63.000	63	148.0	1.48	22	15	15	7	15	y	own bed	own bed	19	19	45	45	nothing	nothing	nothing	nothing	0	0								South	Yes
2080	13	606	2015-11-26	2005-04-25	2990	f	1969	Unemployed	High	1969	Employed	High	y	y	1	0	0		47.000	47	143.0	1.43	22	00	0	7	15	y	own bed	own bed	20	20	0	0	nothing	nothing	nothing	nothing	1	0								South	No
2081	13	606	2015-11-26	2011-08-08	3100	f	1982	Employed	University	1977	Employed	High	y	y	0	1	0		18.000	18	103.0	1.03	22	00	0	7	30	n	parents' bed	own bed	20	20	0	0	nothing	nothing	nothing	nothing	0	0								South	No
2082	13	606	2015-11-26	2014-03-28	3930	m	1982	Employed	University	1977	Employed	High	y	y	1	0	0		11.650	11.65	78.0		22	00	0	8	0	n	parents' bed	own bed	20	20	0	0	nothing	nothing	nothing	nothing	1	2								South	Yes
2083	13	606	2015-11-26	2008-10-11	3850	m	1974	Employed	Middle	1975	Employed	High	y	y	0	1	0		27.000	27	125.0	1.25	22	30	30	7	15	y	own bed	own bed	20	20	0	0	nothing	nothing	nothing	nothing	1	0								South	Yes
2084	13	606	2015-11-26	2013-07-11	2600	m	1971	Employed	University	1971	Employed	High	y	y	2	0	0		11.700	11.7	88.5	0.885	23	30	30	6	30	y	parents' bed	own bed	20	20	0	0	milk	nothing	nothing	nothing	1	3								South	Yes
2085	13	606	2015-11-26	2011-04-22	3250	f	1988	Works at home	High	1983	Employed	High	y	y	0	0	0		19.000	19	112.0	1.12	22	00	0	8	30	y	parents' bed	parents' bed	20	20	0	0	milk	nothing	nothing	nothing	0	2								South	No
2086	13	606	2015-11-25	2008-07-18	3120	m	1973	Employed	University	1971	Employed	High	y	y	0	0	0		22.000	22	123.0	1.23	22	30	30	7	30	y	parents' bed	own bed	20	20	0	0	nothing	nothing	nothing	nothing	1	0								South	Yes
2087	13	606	2015-11-25	2006-09-03	3800	m	1973	Unemployed	Elementary	1968	Employed	Middle	n	y	0	0	0		27.000	27	135.0	1.35	21	00	0	6	45	y	own bed	own bed	20	20	0	0	nothing	salted	nothing	nothing	1	0								South	Yes
2088	13	606	2015-11-25	2010-01-27	2700	f	1975	Employed	University	1979	Employed	University	y	y	0	0	0		22.000	22	118.0	1.18	21	30	30	7	0	y	parents' bed	parents' bed	20	20	0	0	nothing	nothing	nothing	nothing	0	0								South	No
2089	13	606	2015-11-25	2002-09-11	3650	m	1965	Works at home	High	1969	Employed	University	y	n	0	0	0		66.500	66.5	166.0	1.66	22	30	30	7	0	n	own bed	own bed	20	20	15	15	nothing	nothing	nothing	nothing	1	0								South	Yes
2090	13	606	2015-11-25	2008-06-15	3520	m	1974	Employed	University	1979	Employed	University	y	y	0	1	0		22.000	22	120.0	1.2	21	00	0	7	15	y	own bed	own bed	20	20	0	0	nothing	nothing	nothing	nothing	0	0								South	Yes
2091	13	606	2015-11-25	2009-10-16	3990	m	1974	Employed	University	1979	Employed	University	y	y	1	0	0		29.000	29	123.0	1.23	20	30	30	7	15	y	own bed	own bed	19	19	30	30	nothing	nothing	nothing	nothing	0	0								South	Yes
2092	13	606	2015-11-26	2012-11-28	2870	m	1981	Works at home	Middle	1979	Employed	High	y	y	1	1	0		11.750	11.75	91.0	0.91	21	30	30	9	30	y	parents' bed	own bed	20	20	0	0	nothing	nothing	nothing	nothing	2	2								South	Yes
2093	4	502	2015-11-27	2009-12-12	3750	f	1968	Employed	High	1970	Employed	High	y	y	0	0	0		22.500	22.5	112.5	1.125	23	00	0	7	45	y	own bed	own bed	20	20	0	0	nothing	fruit & sweet	milk	nothing	1	0.75								South	No
2094	20	487	2015-11-27	2012-11-03	2960	f	1979	Works at home	Middle	1980	Employed	Middle	y	y	0	0	0		12.350	12.35	95.0	0.95	21	45	45	7	15	y	own bed	parents' bed	20	20	0	0	milk	nothing	nothing	nothing	2	1		y						North	No
2095	4	602	2015-10-28	2010-11-19	3050	m	1983	Works at home	Middle	1979	Employed	Middle	y	n	1	0	3		19.000	19	102.0	1.02	22	30	30	7	0	n	own bed	own bed	20	20	0	0	milk	salted & sweet	nothing	nothing	0	0								South	Yes
2097	7	613	2015-12-01	2014-11-24	3410	m	1972	Works at home	High	1975	Unemployed	High	y	y	0	0	0		10.700	10.7	85.0		23	15	15	8	15	y	other room	own bed	19	19	45	45	milk	nothing	nothing	nothing	1	2								Center	Yes
2098	10	609	2015-12-01	2012-05-06	3360	f	1974	Employed	Middle	1970	Employed	Middle	y	y	1	0	0		22.000	22	111.0	1.11	21	30	30	6	0	y	parents' bed	own bed	20	20	0	0	nothing	nothing	nothing	nothing	0	0								Center	No
2099	10	609	2015-12-01	2006-07-20	3950	m	1977	Employed	High	1972	Employed	High	y	y	1	0	0		33.000	33	157.0	1.57	21	45	45	7	30	y	own bed	own bed	20	20	15	15	other	nothing	nothing	nothing	0	0								Center	Yes
2100	7	585	2015-12-01	2013-02-25	3870	f	1974	Employed	Middle	1971	Employed	Elementary	y	y	1	0	0		17.800	17.8	109.0	1.09	19	30	30	7	30	y	own bed	own bed	18	18	45	45	nothing	nothing	nothing	nothing	0	0								Center	No
2101	10	603	2015-12-01	2012-11-15	3580	f	1976	Employed	University	1978	Employed	University	y	y	0	1	0		17.000	17	96.0	0.96	23	30	30	7	15	y	own bed	own bed	19	19	45	45	nothing	nothing	nothing	nothing	0	0								Center	No
2102	4	491	2015-12-01	2011-06-28	3030	f	1973	Works at home	Middle	1970	Unemployed	Middle	y	y	1	0	0		19.000	19	104.0	1.04	21	30	30	7	30	n	parents' bed	parents' bed	20	20	0	0	nothing	nothing	nothing	nothing	0	3								South	No
2103	10	505	2015-12-01	2008-04-30	3450	m	1974	Employed	Middle	1971	Employed	High	y	y	0	0	0		32.300	32.3	133.3	1.333	22	30	30	7	30	y	parents' bed	own bed	20	20	0	0	nothing	nothing	nothing	nothing	0	0								Center	Yes
2104	7	580	2015-11-10	2013-07-16	3100	m	1978	Other	High	1970	Other	High	y	y	0	0	2		15.100	15.1	96.0	0.96	23	30	30	10	15	na	parents' bed	parents' bed	21	21	0	0	milk	fruit & salted	milk	nothing	3	1								Center	Yes
2105	4	491	2015-12-01	2010-01-23	3750	m	1982	Works at home	Middle	1980	Employed	High	y	y	0	1	0		18.500	18.5	107.6	1.076	22	00	0	7	0	y	other room	parents' bed	19	19	0	0	nothing	nothing	nothing	nothing	0	0								South	Yes
2106	13	598	2015-12-01	2008-03-15	3200	m	1977	Works at home	Middle				y	y	1	0	0	n	25.000	25	125.0	1.25	21	45	45	7	0	c	own bed	own bed	20	20	0	0		nothing	nothing	nothing	0	0.5								South	Yes
2107	13	598	2015-12-01	2008-03-15	3200	m	1977	Works at home	High				y	y	1	0	0	n	25.000	25	125.0	1.25	21	30	30	7	15	c	other room	own bed	20	20	30	30	milk	nothing	juice	nothing	0	0								South	Yes
2108	7	585	2015-12-01	2014-11-06	3650	m	1984	Employed	High	1983	Employed	University	y	y	0	0	0		9.450	9.45	74.0		23	00	0	6	30	n	parents' bed	own bed	19	19	0	0		nothing	nothing	nothing	1	2								Center	Yes
2109	13	598	2015-12-01	2005-02-08	3600	f	1977	Works at home	High				y	y	0	1	0	n	40.000	40	145.0	1.45	21	30	30	7	15	c	own bed	own bed	20	20	30	30	nothing	nothing	nothing	nothing	1	0.25								South	No
2110	10	505	2015-12-01	2008-10-19	3100	m	1979	Employed	High	1977	Employed	High	y	y	0	1	0		38.300	38.3	129.5	1.295	21	30	30	7	0	c	parents' bed	parents' bed	20	20	0	0	nothing	nothing	nothing	nothing	0	0								Center	Yes
2111	13	598	2015-12-01	2011-01-02	2890	f	1974	Employed	Middle				y	y	0	0	0	n	18.000	18	106.0	1.06	21	15	15	7	30	y	own bed	own bed	20	20	0	0		nothing	nothing	nothing	1	0.5								South	No
2112	13	598	2015-12-01	2009-06-19	3400	f	1974	Unemployed	Middle				y	y	2	0	0	n	21.000	21	115.0	1.15	22	00	0	7	15	c	own bed	own bed	21	21	0	0	milk	sweet		nothing	0	0.5								South	No
2113	10	505	2015-12-01	2012-09-25	3820	m	1979	Employed	High	1977	Employed	High	y	y	1	0	0		18.900	18.9	104.8	1.048	22	00	0	6	45	c	parents' bed	parents' bed	20	20	0	0	nothing	nothing	milk & juice	nothing	3	0								Center	Yes
2114	13	598	2015-12-01	2012-09-22	3650	f	1978	Employed	High				y	y	1	0	4	n	18.000	18	106.0	1.06	20	45	45	7	15	c	own bed	own bed	19	19	30	30		nothing		nothing	0	0.5								South	No
2115	13	598	2015-12-01	2008-07-25	3450	m	1979	Employed	High				y	y	0	1	0	n	35.000	35	125.0	1.25	21	15	15	7	30	c	own bed	own bed	20	20	0	0	nothing				1	0.5								South	Yes
2117	10	609	2015-12-01	2013-01-08	1430	f	1971	Employed	Middle	1968	Employed	Middle	y	y	0	0	2		15.400	15.4	102.0	1.02	22	30	30	8	30	y	parents' bed	parents' bed	20	20	0	0	nothing	nothing	nothing	nothing	2	2								Center	No
2118	4	602	2015-10-28	2007-07-23	2950	m	1983	Works at home	Middle	1979	Employed	Middle	y	n	0	1	3		29.200	29.2	125.0	1.25	21	45	45	7	0	n	parents' bed	parents' bed	20	20	0	0	nothing	nothing	nothing	nothing	0	0								South	Yes
2119	4	602	2015-10-01	2011-05-23	4200	m	1980	Employed	University	1979	Employed	University	y	y	0	1	0		15.000	15	98.0	0.98	22	00	0	7	15	c	own bed	own bed	20	20	0	0	nothing	sweet	nothing	nothing	1	1.5								South	Yes
2120	4	602	2015-10-20	2011-04-13	2970	m	1975	Employed	University	1979	Employed	University	y	y	0	1	0		16.500	16.5	107.5	1.075	22	00	0	7	45	c	parents' bed	parents' bed	19	19	30	30	nothing	nothing	nothing	nothing	1	1.75								South	Yes
2121	4	602	2015-10-01	2012-08-07	3200	f	1980	Employed	University	1979	Employed	University	y	y	1	0	0		14.000	14	92.0	0.92	22	00	0	7	15	c	own bed	own bed	20	20	0	0	nothing	sweet	nothing	nothing	1	1.5								South	No
2122	4	602	2015-11-05	2013-01-24	3130	m	1976	Works at home	High	1967	Employed	Middle	y	y	1	0	0		12.500	12.5	92.0	0.92	20	00	0	7	0	n	own bed	own bed	19	19	30	30	nothing	nothing	nothing	nothing	0	0								South	Yes
2123	13	598	2015-12-01	2008-04-16	3100	m	1978	Employed	High				y	y	0	0	1	n	26.000	26	136.0	1.36	22	00	0	7	30	y	own bed	own bed	20	20	30	30	milk	nothing	nothing	nothing	1	0.5								South	Yes
2124	4	602	2015-11-05	2010-08-01	3030	m	1976	Works at home	High	1967	Employed	Middle	y	y	0	1	0		19.500	19.5	112.5	1.125	21	00	0	7	0	y	parents' bed	parents' bed	19	19	30	30	nothing	nothing	nothing	nothing	0	0								South	Yes
2126	13	530	2015-12-02	2014-09-23	3300	m	1978	Unemployed	University	1973	Employed	High	y	y	1	0	0		13.700	13.7	88.5		23	30	30	7	30	c	parents' bed	parents' bed	20	20	30	30	milk	nothing	milk	nothing	4	1.5								South	Yes
2128	7	585	2015-12-02	2014-10-17	3600	f	1984	Employed	Middle	1981	Employed	Middle	y	y	0	0	0		12.400	12.4	88.0		22	30	30	8	15	n	outside home	parents' bed	19	19	30	30	nothing	nothing	nothing	nothing	1	2								Center	No
2129	7	613	2015-12-02	2005-12-04	3150	f	1974	Employed	University	1970	Employed	High	y	y	0	0	0		30.500	30.5	147.5	1.475	21	30	30	8	0	y	other room	own bed	19	19	15	15	nothing	nothing	nothing	nothing	0	0								Center	No
2130	4	491	2015-12-02	2010-12-23	2860	m	1983	Works at home	University	1980	Employed	High	y	y	1	0	0		18.500	18.5	111.6	1.116	22	30	30	7	45	y	own bed	own bed	19	19	30	30	milk	nothing	nothing	nothing	1	0								South	Yes
2131	7	613	2015-12-02	2012-09-21	3020	m	1985	Works at home	High	1984	Employed	High	y	y	0	0	0		16.000	16	101.5	1.015	23	00	0	7	0	y	parents' bed	parents' bed	19	19	30	30	nothing	nothing	nothing	nothing	1	2.5								Center	Yes
2132	4	491	2015-12-02	2009-05-05	2900	f	1983	Works at home	University	1980	Employed	High	y	y	0	1	0		36.500	36.5	128.2	1.282	22	45	45	7	45	y	own bed	own bed	19	19	30	30	milk	sweet	nothing	nothing	2	0								South	No
2133	7	613	2015-12-02	2007-12-04	3330	m	1969	Employed	University	1962	Employed	High	y	y	2	0	0		22.300	22.3	122.0	1.22	21	30	30	7	15	y	own bed	own bed	20	20	30	30	nothing	nothing	nothing	nothing	0	0								Center	Yes
2134	10	505	2015-12-02	2007-11-11	3900	m	1978	Employed	High	1971	Employed	High	y	y	0	1	0		34.800	34.8	145.5	1.455	22	00	0	7	30	c	own bed	own bed	20	20	0	0	nothing	sweet	nothing	nothing	0	0								Center	Yes
2135	4	523	2015-12-02	2008-04-09	2850	m	1978	Employed	High	1980	Employed	Middle	y	y	0	0	3		18.000	18	114.0	1.14	22	15	15	7	15	y	parents' bed	parents' bed	19	19	15	15	nothing	sweet	nothing	nothing	1	0								South	Yes
2136	4	523	2015-12-02	2004-02-04	3000	f	1970	Employed	University	1968	Employed	University	y	y	1	0	0		35.000	35	130.0	1.3	21	15	15	7	15	y	own bed	own bed	20	20	0	0	nothing	nothing			0	0								South	No
2137	4	523	2015-12-02	2013-03-12	3000	m	1987	Employed	University	1976	Unemployed	High	y	y	0	0	0		18.000	18	100.0	1	23	30	30	8	15	n	parents' bed	parents' bed	20	20	15	15	milk	sweet	nothing	nothing	2	0								South	Yes
2138	4	602	2015-11-11	2009-09-21	3380	m	1977	Works at home	High	1975	Employed	High	y	y	1	0	0		19.500	19.5	113.5	1.135	21	00	0	7	0	y	parents' bed	parents' bed	20	20	0	0	nothing	nothing	nothing	nothing	1	0								South	Yes
2139	4	602	2015-11-11	2013-08-02	3300	m	1980	Employed	University	1977	Employed	High	y	y	0	1	0		13.500	13.5	95.0	0.95	21	30	30	7	0	y	own bed	own bed	19	19	30	30	milk	sweet	nothing	nothing	1	0								South	Yes
2140	4	602	2015-11-05	2014-06-04	2970	f	1994	Works at home	Middle	1980	Employed	Middle	y	y	0	0	1		9.800	9.8	74.5		20	30	30	7	0	n	parents' bed	own bed	19	19	30	30	milk	nothing	milk	nothing	2	1.5								South	No
2141	4	602	2015-11-26	2003-06-09	2750	m	1976	Works at home	High				y	n	0	1	0	n	50.000	50	160.0	1.6	23	30	30	7	15	y	own bed	own bed	20	20	15	15	nothing	sweet	nothing	nothing	2	0								South	Yes
2142	4	602	2015-11-18	2014-11-17	2830	m	1988	Works at home	Middle	1989	Employed	High	y	y	0	0	0		10.100	10.1	78.0		24	00	0	8	15	y	own bed	own bed	19	19	30	30	milk	nothing	nothing	nothing	2	2								South	Yes
2143	4	602	2015-11-18	2013-03-03	2980	f	1978	Employed	High	1976	Employed	High	y	y	0	0	0		12.000	12	90.0	0.9	22	30	30	7	30	n	parents' bed	parents' bed	19	19	0	0	milk	nothing	nothing	nothing	1	2								South	No
2144	4	602	2015-11-18	2014-07-20	3370	f	1981	Employed	University	1980	Employed	University	y	y	0	0	0		10.100	10.1	80.5		22	30	30	7	0	n	own bed	own bed	19	19	30	30	nothing	nothing	nothing	nothing	1	2								South	No
2145	4	608	2015-12-02	2014-05-23	2730	f	1978	Works at home	High	1971	Employed	Middle	y	y	1	0	0		12.580	12.58	91.4		21	30	30	7	30	c	own bed	own bed	19	19	0	0	milk	nothing	nothing	nothing	0	1								South	No
2146	4	608	2015-12-02	2008-10-23	1900	f	1976	Works at home	High	1968	Employed	High	y	y	0	1	0		28.100	28.1	117.5	1.175	21	30	30	6	0	y	own bed	own bed	20	20	45	45	nothing	nothing	nothing	nothing	2	0								South	No
2147	4	608	2015-12-02	2014-06-15	2980	f	1981	Employed	High	1981	Employed	High	y	y	1	0	0		12.170	12.17	84.5		22	00	0	8	0	n	own bed	parents' bed	19	19	0	0	milk	nothing	nothing	nothing	0	1.5								South	No
2148	4	602	2015-11-25	2011-01-25	3710	f	1972	Employed	High	1966	Employed	High	y	y	2	0	0		15.500	15.5	105.0	1.05	21	30	30	7	0	c	own bed	own bed	19	19	30	30	nothing	nothing	nothing	nothing	0	1								South	No
2149	4	602	2015-11-26	2014-06-25	3950	f	1976	Works at home	High	1972	Employed	High	y	y	1	0	0		12.800	12.8	83.5		2	00	0	10	30	n	other room	parents' bed	19	19	0	0	nothing	nothing		nothing	1	2								South	No
2150	4	602	2015-11-26	2013-06-19	3150	m	1985	Works at home	High	1983	Employed	High	y	y	1	0	0		11.600	11.6	88.0	0.88	21	00	0	8	0	y	own bed	parents' bed	19	19	0	0	nothing	nothing	nothing	nothing	1	1								South	Yes
2151	4	602	2015-11-25	2008-08-11	3370	m	1980	Employed	University	1979	Employed	High	y	y	0	1	0		37.000	37	131.0	1.31	22	00	0	7	0	y	parents' bed	parents' bed	19	19	0	0	nothing	nothing	nothing	nothing	0	0								South	Yes
2152	4	602	2015-11-25	2006-06-23	3000	f	1968	Employed	High	1971	Unemployed	High	y	y	0	0	0		26.000	26	127.0	1.27	22	30	30	6	45	n	parents' bed	parents' bed	19	19	0	0	nothing	nothing	nothing	nothing	0	0								South	No
2154	4	602	2015-11-24	2013-03-15	3100	m	1976	Employed	University	1973	Employed	High	y	y	0	1	0		15.000	15	97.0	0.97	24	00	0	9	30	y	parents' bed	own bed	19	19	30	30	milk	nothing	nothing	nothing	0	2								South	Yes
2155	4	602	2015-11-12	2007-11-12	3650	m	1974	Works at home	University	1971	Employed	University	y	y	0	0	0		35.000	35	130.0	1.3	22	30	30	7	15	y	parents' bed	parents' bed	19	19	30	30	nothing	nothing	nothing	nothing	0	0								South	Yes
2156	4	602	2015-11-26	2014-05-30	3320	f	1977	Works at home	High	1975	Employed	Middle	y	y	2	0	0		10.800	10.8	80.5		22	30	30	7	0	n	parents' bed	parents' bed	19	19	30	30	nothing	nothing	nothing	nothing	3	2								South	No
2157	7	585	2015-12-03	2004-05-23	2800	m	1986	Works at home	Elementary	1982	Employed	Elementary	y	y	0	0	0		33.000	33	143.0	1.43	22	00	0	7	30	n	own bed	own bed	20	20			nothing	nothing	nothing	nothing	0	0								Center	Yes
2158	7	585	2015-12-03	2011-09-24	3070	f	1992	Works at home	Middle	1985	Employed	Elementary	y	y	0	0	0		15.300	15.3	107.0	1.07	22	15	15	8	0	n	parents' bed	own bed	20	20	0	0	juice	sweet	nothing	nothing	1	0.5								Center	No
2159	7	580	2015-11-20	2006-05-25	2500	f	1966	Employed	University	1966	Employed	University	y	y	0	0	0		26.000	26	149.0	1.49	22	00	0	7	30	n	own bed	own bed	20	20	0	0	nothing	nothing	nothing	nothing	0	0								Center	No
2160	7	580	2015-11-20	2012-10-15	3500	f	1976	Employed	University	1976	Employed	University	y	y	0	1	0		17.800	17.8	99.0	0.99	22	30	30	7	45	y	own bed	own bed	20	20	0	0	nothing	nothing	nothing	nothing	1	2								Center	No
2161	10	603	2015-12-03	2004-10-19	3380	f	1972	Employed	High	1968	Employed	Middle	y	y	1	0	0		58.500	58.5	148.5	1.485	22	15	15	7	15	c	own bed	own bed	20	20	0	0	nothing	nothing	nothing	nothing	1	0								Center	No
2162	7	580	2015-11-17	2014-11-11	2500	m	1980	Employed	High	1981	Employed	High	y	y	1	0	0		9.000	9	75.0		22	30	30	8	15	c	other room	own bed	19	19	30	30	milk	nothing	milk	nothing	1	2.5								Center	Yes
2163	7	580	2015-11-18	2014-02-26	2400	m	1979	Employed	University	1976	Employed	University	y	y	1	0	0		11.000	11	88.0		21	45	45	6	30	n	own bed	own bed	18	18	30	30	nothing	nothing	nothing	nothing	2	1.75								Center	Yes
2165	7	585	2015-12-03	2009-08-26	3420	m	1973	Works at home	Middle	1970	Employed	Elementary	y	y	1	0	2		20.700	20.7	122.5	1.225	22	00	0	7	30	c	other room	own bed	19	19	0	0	nothing	nothing	nothing	nothing	0	0								Center	Yes
2166	4	608	2015-12-03	2010-11-30	3600	m	1981	Works at home	High	1974	Employed	High	y	y	2	0	0		21.400	21.4	105.3	1.053	21	00	0	7	30	c	parents' bed	own bed	19	19	0	0	nothing	nothing	nothing	nothing	0	0								South	Yes
2167	4	608	2015-12-03	2008-01-23	2580	m	1979	Works at home	High	1975	Employed	Middle	y	y	1	0	0		25.100	25.1	126.2	1.262	22	00	0	7	0	c	own bed	own bed	19	19	0	0	nothing	nothing	nothing	nothing	0	0								South	Yes
2168	4	608	2015-12-03	2013-06-01	3300	m	1988	Employed	High	1987	Employed	High	y	y	0	1	0		14.510	14.51	97.2	0.972	21	30	30	7	30	n	own bed	parents' bed	18	18	30	30	milk	sweet	nothing	nothing	1	1								South	Yes
2169	4	523	2015-12-04	2008-02-26	3420	m	1979	Works at home	High	1978	Employed	Middle	y	y	0	0	0		33.000	33	132.0	1.32	22	00	0	7	30	n	parents' bed	parents' bed	18	18	30	30	nothing	nothing	nothing	nothing	0	0								South	Yes
2170	7	585	2015-12-04	2014-08-08	2900	f	1976	Employed	High	1973	Employed	High	y	y	1	0	0		12.000	12	87.0		22	30	30	9	0	n	outside home	own bed	19	19	30	30	nothing	nothing	nothing	nothing	2	2								Center	No
2171	10	609	2015-12-04	2007-05-15	3650	m	1979	Employed	Middle	1975	Employed	Middle	y	y	1	0	0		51.000	51	142.0	1.42	21	30	30	7	0	y	own bed	own bed	20	20	0	0	nothing	nothing	nothing	nothing	1	0								Center	Yes
2172	10	505	2015-12-04	2003-11-18	2940	m	1970	Employed	University	1962	Employed	University	y	n	0	1	0		45.500	45.5	148.2	1.482	23	30	30	7	0	y	own bed	own bed	20	20	0	0	nothing	fruit	nothing	nothing	0	0								Center	Yes
2173	10	505	2015-12-04	2009-11-21	2800	m	1977	Employed	High	1979	Employed	University	y	y	0	1	0		19.200	19.2	116.5	1.165	22	00	0	7	0	c	own bed	own bed	20	20	0	0	milk	sweet	nothing	nothing	0	0								Center	Yes
2174	10	505	2015-12-04	2009-11-23	2600	f	1974	Employed	High	1970	Employed	University	y	y	0	0	0		21.600	21.6	114.8	1.148	21	30	30	7	0	y	own bed	own bed	19	19	30	30	nothing	nothing	nothing	nothing	0	0								Center	No
2177	7	580	2015-11-17	2011-05-12	3150	m	1969	Other	University	1969	Employed	High	y	y	0	0	0		22.000	22	109.0	1.09	23	00	0	9	30	n	own bed	own bed	20	20	0	0	nothing	nothing	nothing	nothing	1	0								Center	Yes
2178	7	580	2015-11-27	2012-04-10	3065	f	1976	Employed	University	1974	Employed	University	y	y	0	1	0		16.000	16	96.0	0.96	21	45	45	7	15	y	parents' bed	parents' bed	19	19	30	30	nothing	nothing	nothing	nothing	1	1.5								Center	No
2179	7	580	2015-11-05	2014-10-03	2600	m	1971	Other	University	1972	Other	University	y	y	1	0	0		12.900	12.9	79.0		22	15	15	9	30	y	other room	own bed	20	20	0	0	nothing	nothing	nothing	nothing	1	1								Center	Yes
2180	7	580	2015-11-06	2013-11-01	2300	m	1973	Employed	University	1969	Employed	University	y	y	1	0	0		12.000	12	87.0	0.87	20	45	45	5	30	n	own bed	own bed	19	19							4	1								Center	Yes
2181	7	580	2015-11-05	2011-11-05	3580	m	1977	Employed	University	1978	Employed	High	y	y	1	0	0		16.000	16	98.0	0.98	23	30	30	9	15	n	parents' bed	parents' bed	20	20	0	0	milk	nothing	milk	nothing	1	0.5								Center	Yes
2182	7	580	2015-11-05	2014-10-03	2300	m	1971	Employed	University	1972	Employed	University	y	y	0	1	0		10.500	10.5	76.0		22	15	15	9	30	y	own bed	own bed	20	20	0	0	nothing	nothing	nothing	nothing	4	1								Center	Yes
2183	7	580	2015-10-09	2012-07-03	3300	m	1974	Employed	High	1970	Employed	High	y	y	0	0	0		17.300	17.3	102.0	1.02	22	30	30	7	30	n	parents' bed	own bed	20	20	15	15	nothing	salted	nothing	nothing	0	1.5								Center	Yes
2184	7	580	2015-11-11	2013-10-18	3920	m		Employed		1977	Employed	High	y	y	0	0	0		12.000	12	86.0	0.86	23	00	0	9	0	n	parents' bed	parents' bed	20	20	0	0	milk	nothing	nothing	nothing	2	0								Center	Yes
2185	7	580	2015-10-09	2008-07-06	3920	m	1973	Employed	University	1973	Employed	High	y	y	0	0	0		36.500	36.5	138.5	1.385	22	00	0	7	30	c	own bed	own bed	20	20	30	30	nothing	nothing	nothing	nothing	0	0								Center	Yes
2186	7	580	2015-10-09	2010-09-22	3550	f	1973	Employed	University	1973	Employed	High	y	y	1	1	0		23.800	23.8	111.2	1.112	22	00	0	7	30	c	own bed	own bed	20	20	30	30	nothing	nothing	nothing	nothing	0	0								Center	No
2187	7	580	2015-11-20	2014-04-17	2800	m	1978	Employed	High	1977	Employed	Middle	y	y	1	0	0		11.500	11.5	83.5		21	00	0	7	30	n	own bed	own bed	20	20	0	0	nothing	nothing	nothing	nothing	1	2								Center	Yes
2188	7	580	2015-11-20	2009-09-21	2360	f	1978	Employed	High	1977	Employed	Middle	y	y	1	0	0		29.000	29	114.7	1.147	21	30	30	6	30	y	parents' bed	own bed	20	20	0	0	nothing	nothing	nothing	nothing	1	0								Center	No
2189	7	580	2015-11-20	2009-09-04	2500	f	1986	Works at home	Middle	1970	Other	High	y	y	0	0	0		24.100	24.1	118.7	1.187	21	30	30	7	15	y	own bed	own bed	20	20	0	0	other	nothing	nothing	nothing	0	0								Center	No
2190	7	580	2015-11-20	2008-10-12	3400	m	1980	Employed	University	1980	Employed	University	y	y	1	0	0		20.900	20.9	116.5	1.165	22	00	0	7	0	c	own bed	own bed	20	20	30	30	nothing	nothing	nothing	nothing	0	0.5								Center	Yes
2191	7	580	2015-11-13	2012-06-01	3300	f	1980	Employed	University	1980	Employed	University	y	y	1	0	0		16.200	16.2	93.7	0.937	22	00	0	7	0	c	own bed	own bed	20	20	30	30	nothing	nothing	nothing	nothing	1	1								Center	No
2192	7	580	2015-11-13	2012-09-28	3415	m	1979	Works at home	University	1973	Employed	High	y	y	0	1	0		13.900	13.9	97.2	0.972	22	30	30	8	0	c	own bed	own bed	21	21	30	30	nothing	nothing	milk	nothing	0	2								Center	Yes
2193	7	580	2015-10-08	2014-06-23	1520	m	1994	Works at home	Middle	1991	Employed	Middle	y	y	0	1	0		10.000	10	78.6		21	30	30	6	30	c	own bed	own bed	20	20	30	30	nothing	nothing	nothing	nothing	2	2.75								Center	Yes
2194	7	580	2015-10-08	2014-06-23	1420	f	1994	Works at home	Middle	1991	Employed	Middle	y	y	0	1	0		9.300	9.3	76.8		21	30	30	7	30	c	own bed	own bed	20	20	30	30	nothing	nothing	nothing	nothing	2	2.75								Center	No
2195	7	580	2015-10-06	2014-07-17	2750	m	1985	Employed	High	1987	Employed	Middle	y	y	1	0	0		10.700	10.7	82.0		22	00	0	7	30	n	own bed	own bed	20	20	30	30	nothing	nothing	nothing	nothing	5	2								Center	Yes
2196	7	580	2015-11-27	2012-09-21	3380	m	1972	Employed	High	1972	Unemployed	High	y	y	0	0	0		16.000	16	97.0	0.97	23	00	0	8	0	n	parents' bed	parents' bed	20	20	0	0	nothing	nothing	nothing	nothing	0	2								Center	Yes
2197	13	616	2015-11-03	2005-08-09	3400	f	1985	Employed	University	1985	Employed	Middle	y	y	1	0	0		38.000	38	150.0	1.5	22	00	0	7	0	n	parents' bed	parents' bed	20	20	0	0	nothing	nothing	nothing	nothing	0	0								South	No
2198	13	616	2015-11-03	2014-05-20	4160	f	1975	Employed	Middle	1973	Employed	Middle	y	y	1	0	0		11.700	11.7	75.0		21	30	30	7	30	n	own bed	own bed	19	19	0	0	milk	nothing	nothing	nothing	2	2								South	No
2199	13	616	2015-10-27	2013-04-23	3050	m	1985	Works at home	High	1986	Employed	High	y	y	0	1	0		10.700	10.7	85.0	0.85	21	00	0	8	0	y	own bed	own bed	20	20	30	30	nothing	salted	nothing	nothing	0	4								South	Yes
2200	13	616	2015-10-27	2013-05-22	3200	f	1980	Works at home	High	1977	Employed	High	y	y	0	1	0		11.000	11	83.0	0.83	24	00	0	9	30	n	parents' bed	own bed	20	20	0	0	milk	nothing	nothing	nothing	3	1								South	No
2201	13	616	2015-10-27	2013-11-27	3070	m	1989	Employed	Middle	1984	Employed	Middle	y	y	0	0	0		14.400	14.4	86.0		23	30	30	9	30	n	other room	own bed	19	19	30	30	milk	nothing	nothing	nothing	0	2								South	Yes
2202	13	616	2015-10-23	2013-02-04	2790	f	1978	Employed	Middle	1979	Employed	Middle	y	y	1	0	0		11.800	11.8	85.0	0.85	22	00	0	8	0	n	own bed	own bed	21	21	0	0	nothing	salted	nothing	nothing	0	2								South	No
2203	13	616	2015-10-23	2014-02-10	3100	m	1987	Works at home	Middle	1980	Employed	High	y	y	0	0	0		10.700	10.7	82.0		21	30	30	8	30	n	parents' bed	parents' bed	19	19	0	0	milk	nothing	nothing	nothing	2	3								South	Yes
2204	13	616	2015-10-22	2013-10-23	3950	m	1980	Employed	University	1971	Employed	High	y	y	1	0	0		13.500	13.5	92.0		22	00	0	7	0	n	parents' bed	parents' bed	19	19	30	30	milk	nothing	milk	nothing	1	2								South	Yes
2205	13	616	2015-10-15	2013-03-28	3300	m	1997	Student	Middle	1994	Unemployed	High	y	y	0	0	2		11.300	11.3	82.5	0.825	22	00	0	8	0	n	parents' bed	parents' bed	21	21	0	0	milk	sweet	nothing	nothing	0	2.5								South	Yes
2206	13	616	2015-10-14	2010-01-09	3200	f	1984	Works at home	Middle	1984	Unemployed	Middle	y	y	1	0	0		33.500	33.5	119.0	1.19	22	00	0	7	0	y	other room	own bed	20	20	0	0	nothing	nothing	nothing	nothing	1	0								South	No
2207	13	616	2015-10-14	2013-09-09	3120	m	1992	Works at home	High	1983	Employed	High	y	y	0	0	0		14.300	14.3	89.0	0.89	24	00	0	9	0	n	parents' bed	own bed	19	19	30	30	milk	nothing	nothing	nothing	0	1								South	Yes
2208	13	616	2015-10-21	2010-04-14	3900	m	1979	Employed	Middle	1980	Employed	Middle	y	y	1	0	0		32.000	32	117.0	1.17	21	00	0	9	15	y	own bed	own bed	20	20	0	0	nothing	nothing	nothing	nothing	1	0								South	Yes
2209	13	616	2015-10-13	2004-10-12	3350	m	1975	Employed	High	1979	Unemployed	Middle	y	y	0	0	0		41.000	41	147.0	1.47	22	30	30	6	45	n	own bed	own bed	20	20	30	30	nothing	nothing	nothing	nothing	0	0								South	Yes
2210	13	616	2015-10-13	2013-04-23	3200	m	1984	Works at home	High	1980	Employed	Middle	y	y	1	0	0		11.700	11.7	87.0	0.87	23	00	0	8	0	n	parents' bed	own bed	20	20	30	30	nothing	nothing	nothing	nothing	2	2								South	Yes
2211	13	616	2015-10-13	2014-09-09	3540	f	1984	Works at home	High	1984	Employed	High	y	y	0	0	0		10.450	10.45	75.5		22	00	0	8	30	n	parents' bed	own bed	18	18	45	45	milk	nothing	nothing	nothing	2	2								South	No
2212	13	616	2015-10-13	2012-12-05	2890	f	1980	Works at home	Middle	1979	Employed	Middle	y	y	0	1	0		12.500	12.5	92.0	0.92	23	00	0	8	0	n	parents' bed	parents' bed	20	20	30	30	milk	nothing	nothing	nothing	0	2								South	No
2213	13	616	2015-10-09	2010-10-07	3000	f	1989	Works at home	High	1989	Employed	Middle	y	y	0	0	0		23.000	23	117.0	1.17	22	00	0	7	30	y	other room	parents' bed	20	20	0	0	nothing	nothing	nothing	nothing	0	0								South	No
2214	13	616	2015-10-09	2009-09-09	3390	m	1969	Employed	University	1969	Employed	High	y	y	0	0	0		20.000	20	118.0	1.18	22	30	30	7	15	y	parents' bed	own bed	21	21	0	0	milk	nothing	nothing	nothing	0	0								South	Yes
2215	13	616	2015-10-08	2013-10-28	3200	m	1980	Works at home	Middle	1972	Employed	High	y	y	1	0	0		11.000	11	83.0		22	30	30	7	45	n	own bed	own bed	20	20	0	0	nothing	sweet	nothing	nothing	0	3	y							South	Yes
2216	13	616	2015-10-08	2011-12-21	4400	m	1980	Works at home	Middle	1972	Employed	High	y	y	0	1	0		16.300	16.3	97.0	0.97	23	00	0	7	45	n	own bed	own bed	20	20	0	0	juice	nothing	nothing	nothing	0	0								South	Yes
2217	4	602	2015-10-08	2005-01-03	3100	m	1974	Employed	University	1971	Employed	University	y	y	0	1	2		42.000	42	145.0	1.45	23	00	0	7	0	y	own bed	own bed	20	20	0	0	nothing	nothing	nothing	nothing	0	0								South	Yes
2218	4	602	2015-10-08	2009-05-17	2730	m	1974	Employed	University	1971	Employed	University	y	y	1	0	2		18.000	18	112.0	1.12	22	00	0	7	0	y	own bed	own bed	20	20	0	0	nothing	nothing	nothing	nothing	1	0								South	Yes
2219	4	602	2015-11-11	2013-09-24	4150	f	1987	Works at home	High	1976	Employed	Middle	y	y	0	0	0		12.500	12.5	85.0	0.85	23	00	0	10	0	n	parents' bed	own bed	20	20	0	0	nothing	nothing	nothing	nothing	0	1.25								South	No
2220	4	602	2015-11-19	2011-04-09	3400	m	1981	Works at home	University	1975	Employed	High	y	y	0	1	0		16.500	16.5	104.0	1.04	20	00	0	7	30	c	own bed	own bed	19	19	0	0	nothing	nothing	nothing	nothing	1	0								South	Yes
2221	4	602	2015-11-13	2012-10-31	3630	m	1983	Employed	University	1976	Employed	High	y	y	0	0	0		15.000	15	94.0	0.94	22	30	30	6	0	n	own bed	own bed	19	19	30	30	nothing	nothing	nothing	nothing	1	2								South	Yes
2222	4	602	2015-11-19	2012-11-19	2800	f	1981	Works at home	University	1975	Employed	High	y	y	1	0	0		10.500	10.5	86.5	0.865	20	00	0	7	30	c	own bed	own bed	19	19	0	0	nothing	nothing	nothing	nothing	3	0								South	No
2223	4	602	2015-11-17	2013-10-18	3120	m	1984	Works at home	Middle	1969	Employed	High	y	y	1	0	0		13.000	13	93.0	0.93	24	00	0	8	30	n	parents' bed	own bed	19	19	30	30	nothing	nothing	nothing	nothing	2	1.5								South	Yes
2224	4	602	2015-11-17	2010-09-17	3190	f	1984	Works at home	Middle	1969	Employed	High	y	y	0	1	0		21.000	21	119.5	1.195	22	30	30	8	30	y	other room	own bed	19	19	30	30	nothing	nothing	nothing	nothing	1	0								South	No
2225	13	616	2015-10-07	2011-08-06	3650	f	1976	Employed	University	1976	Employed	Middle	y	y	0	0	0		14.500	14.5	101.0	1.01	22	00	0	8	0	n	parents' bed	parents' bed	20	20	0	0	nothing	sweet	nothing	nothing	0	0								South	No
2226	13	616	2015-10-07	2011-10-08	3150	m	1973	Employed	Middle	1965	Employed	High	y	y	1	0	0		18.000	18	108.0	1.08	21	30	30	7	15	n	parents' bed	parents' bed	20	20	0	0	milk	nothing	nothing	nothing	1	0								South	Yes
2227	15	610	2015-12-10	2006-11-02	3450	m	1969	Works at home	Middle	1964	Employed	Middle	y	y	0	0	0		32.500	32.5	129.5	1.295	22	00	0	7	0	y	parents' bed	own bed	20	20	0	0	nothing	nothing	nothing	nothing	0	0								South	Yes
2228	13	616	2015-10-14	2012-11-05	2380	m	1983	Works at home	University	1980	Employed	High	y	y	0	0	0		13.500	13.5	91.0	0.91	22	30	30	7	0	y	own bed	parents' bed	20	20	0	0	nothing	nothing	nothing	nothing	1	2.25								South	Yes
2229	13	616	2015-10-06	2011-10-10	2300	m	1972	Employed	High	1976	Employed	High	y	y	0	0	0		15.000	15	102.0	1.02	21	00	0	8	0	n	own bed	own bed	19	19	0	0	milk	sweet	nothing	nothing	1	0								South	Yes
2230	13	616	2015-10-16	2014-05-13	3830	m	1986	Employed	University	1982	Employed	High	y	y	0	0	0		11.000	11	80.0		24	00	0	6	30	n	parents' bed	parents' bed	21	21	0	0	milk	nothing	milk	nothing	5	1.5								South	Yes
2231	13	616	2015-11-03	2008-02-08	3650	f	1978	Works at home	High	1979	Employed	Middle	y	y	1	0	0		26.500	26.5	132.5	1.325	22	30	30	7	45	y	own bed	own bed	20	20	0	0	nothing	nothing	nothing	nothing	0	0								South	No
2232	15	610	2015-12-10	2010-10-25	3250	f	1973	Employed	University	1971	Employed	University	y	y	1	0	0		18.000	18	112.7	1.127	23	15	15	7	45	y	parents' bed	parents' bed	21	21	0	0	nothing	nothing	nothing	nothing	0	1								South	No
2233	13	616	2015-12-03	2013-02-11	3300	f	1975	Employed	High	1971	Employed	Middle	y	y	2	0	0		11.700	11.7	86.0	0.86	21	30	30	8	0	n	parents' bed	parents' bed	20	20	0	0	nothing	nothing	nothing	nothing	0	1								South	No
2234	13	616	2015-12-03	2010-10-25	3100	f	1984	Works at home	Middle	1981	Employed	Middle	y	y	1	0	0		23.700	23.7	114.0	1.14	23	00	0	7	0	y	own bed	own bed	19	19	0	0	milk	nothing	nothing	nothing	0	3								South	No
[truncated: 165 more rows]
[truncated: 90 more columns]
